# Supplementary material for: B-cell repertoire sequencing reveals frequent rearrangements of IGHD5-5 in patients with systemic sclerosis
Source: Research Square preprint supplement (doi:10.21203/rs.3.rs-7604828/v1), 2025-12-08
Supplement: Supplementary file 1 [file 637af8e51650fb49de17a912.xlsx]

## Sheet: Sheet1
sample	1	2	3	4	5	6	7	8	9	10	11	12	13	14	15	N1	N2	N3	N4	N5
total_reads	234611	283994	225534	164451	162489	220768	193670	291821	290909	235245	217699	190668	325788	426355	184533	233184	265307	195593	326721	101105
assigned_reads	138908	180666	137370	106752	114980	132928	102322	183962	168973	103093	89263	110764	170275	230250	92487	114036	137950	103431	170039	54214
in_frame_reads	136857	177594	135720	105109	113131	131011	99932	180642	166286	101014	87624	109253	166625	226536	90168	112279	134881	101354	167719	53725
unique_reads	18404	41271	11825	9512	16010	18704	15829	26978	29787	20320	13308	18237	28710	25861	17440	14051	15520	12003	20979	9362
in_frame_unique_reads	16946	38843	10909	8630	14863	17444	14679	24742	27943	18924	12067	17093	26709	23620	16086	12983	14269	11083	19403	8963
median	1	1	1	1	1	1	1	1	1	1	1	1	1	1	1	1	1	1	1	1
diversity_shannon	7.58529	9.15243	6.17775	6.28725	7.52956	7.96657	7.91689	7.995	8.53094	8.15911	7.10482	7.89964	8.1483	7.31725	8.05739	7.1527	7.29233	7.0709	7.53536	7.34978
diversity_simpson	749.478	1412.69	41.3787	192.24	335.696	959.52	929.83	741.681	1053.34	1087.95	455.986	538.641	181.842	304.267	1162.97	358.58	550.507	379.167	562.445	172.383
diversity_pielou	0.778954	0.86611	0.664464	0.693727	0.783788	0.815683	0.825177	0.790312	0.833268	0.828488	0.755975	0.810517	0.79942	0.726649	0.831885	0.75519	0.76233	0.759236	0.763214	0.807592
diversity_de50	0.017113	0.041861	0.007058	0.009502	0.020521	0.02723	0.031065	0.017743	0.029775	0.025153	0.013508	0.025039	0.021753	0.008679	0.028348	0.014635	0.016049	0.016241	0.013245	0.033583
copy1	12940	27250	7829	6509	10520	12481	10523	18604	19175	13499	9450	11950	18782	17940	11505	9775	10780	8299	14531	5828
copy2_4	1973	5841	1454	1229	1967	2234	1869	3018	4124	2941	1468	2572	4076	3069	2335	1638	1774	1395	2529	1362
copy5_9	616	2082	423	311	675	732	593	1023	1620	992	387	902	1550	916	815	469	462	384	696	667
copy10_49	753	3155	751	248	1264	1340	1189	1222	2468	1001	365	1207	1550	987	985	610	646	545	988	984
copy50_99	296	411	234	91	279	406	336	447	370	329	164	313	471	221	307	213	252	201	255	74
copy100_499	353	100	201	207	144	240	167	412	168	156	223	139	273	424	138	259	329	246	376	45
copy500_999	12	2	6	25	6	9	0	10	14	6	10	5	6	46	1	15	21	9	23	1
copy1000over	3	2	11	10	8	2	2	6	4	0	0	5	1	17	0	4	5	4	5	2
N〇＝Control

## Sheet: Sheet2
col1	col2	col3	col4	col5	col6	col7	col8	col9	col10	total	3	4	5	6	7	N1	N2	N3	N4	N5
IGHV3-7	F	x	x	IGHJ4	F	IGHG2	F	CLAGYSSSGAFW	in-frame	18033	18033	0	0	0	0	0	0	0	0	0
IGHV3-7	F	x	x	IGHJ4	F	IGHG2	F	CLAGYSSSGAYW	in-frame	5318	5318	0	0	0	0	0	0	0	0	0
IGHV3/OR16-9	ORF	x	x	IGHJ4	F	IGHG2	F	CLAGYSSSGAFW	in-frame	5109	5109	0	0	0	0	0	0	0	0	0
IGHV3-9	F	IGHD2-8	F	IGHJ4	F	IGHG2	F	CISEPCPGGWCSRAWDYW	in-frame	5079	5079	0	0	0	0	0	0	0	0	0
IGHV1-3	F	x	x	IGHJ4	F	IGHG2	F	CLRDVYGSADYW	in-frame	3476	3476	0	0	0	0	0	0	0	0	0
IGHV1-69	F	x	x	IGHJ4	F	IGHG2	F	CARSIPDSVCRGYCGYFDRW	in-frame	3294	0	0	0	0	0	0	0	0	0	3294
IGHV3-23D	F	IGHD3-10	F	IGHJ4	F	IGHG2	F	CAKSDGSGSYDDFW	in-frame	3243	0	0	0	0	0	0	0	0	3243	0
IGHV3-23D	F	x	x	IGHJ2	F	IGHG2	F	CAKDPDPTYGSGYWYFDLW	in-frame	2607	0	0	0	0	0	2607	0	0	0	0
IGHV2-26	F	IGHD3-22	F	IGHJ6	F	IGHG1	F	CARMGGYYYDSSSYPYYYYGIDVW	in-frame	2537	0	2537	0	0	0	0	0	0	0	0
IGHV2-70,IGHV2-5	F	IGHD3-3	F	IGHJ5	F	IGHG1	F	CAHYNFWSGLVLDPW	in-frame	2534	0	0	0	0	0	0	0	2534	0	0
IGHV3-9	F	x	x	IGHJ4	F	IGHG1	F	CAKASGDQLLLDFDYW	in-frame	2426	0	0	2426	0	0	0	0	0	0	0
IGHV1-3	F	x	x	IGHJ4	F	IGHG2	F	CARATFGKSIMEYW	in-frame	2399	0	2399	0	0	0	0	0	0	0	0
IGHV3-7,IGHV3-69-1,IGHV3-48	F	x	x	IGHJ4	F	IGHG4	F	CARGIGPGLVRGVYFDNW	in-frame	2332	0	0	0	0	0	2332	0	0	0	0
IGHV3-15	F	x	x	IGHJ3	F	IGHG2	F	CTRWDYSAFDIW	in-frame	2068	0	2068	0	0	0	0	0	0	0	0
IGHV2-5	F	IGHD3-9	F	IGHJ4	F	IGHG1	F	CHYGGYFDWSIDYW	in-frame	2059	0	0	2059	0	0	0	0	0	0	0
IGHV3-7	F	x	x	IGHJ4	F	IGHG2	F	CARGSFDCRGVDYW	in-frame	1966	1966	0	0	0	0	0	0	0	0	0
IGHV3-9	F	IGHD6-19	F	IGHJ4	F	IGHG1	F	CAKDTQYLAVAGNFDYW	in-frame	1953	0	0	1953	0	0	0	0	0	0	0
IGHV3-33	F	x	x	IGHJ2	F	IGHG2	F	CARARAGWSLDLW	in-frame	1949	0	0	1949	0	0	0	0	0	0	0
IGHV3-15	F	x	x	IGHJ5	F	IGHG2	F	CNTAVGQWGVRDSW	in-frame	1923	0	1923	0	0	0	0	0	0	0	0
IGHV1-3	F	x	x	IGHJ4	F	IGHG2	F	CLRDVYGSADHW	in-frame	1851	1851	0	0	0	0	0	0	0	0	0
IGHV2-70D,IGHV2-70	F	x	x	IGHJ6	F	IGHG1	F	CARTLARPRWLFNDMDVW	in-frame	1794	0	0	1794	0	0	0	0	0	0	0
IGHV3-15	F	x	x	IGHJ3	F	IGHG2	F	CTRWSYSAFDIW	in-frame	1550	0	1550	0	0	0	0	0	0	0	0
IGHV4-59	F	x	x	IGHJ5	F	IGHG2	F	CARGGASSIWFDPW	in-frame	1528	1528	0	0	0	0	0	0	0	0	0
IGHV4-61,IGHV4-59	F	x	x	IGHJ4	F	IGHG1	F	CAREVPRSTDYIDYW	in-frame	1506	0	0	0	1505	0	0	0	0	1	0
IGHV3-48	F	x	x	IGHJ4	F	IGHG2	F	CATRADHGDFGRGVCDFW	in-frame	1487	1487	0	0	0	0	0	0	0	0	0
IGHV3-15	F	x	x	IGHJ4	F	IGHG2	F	CATRSAAGTLLNW	in-frame	1478	0	1478	0	0	0	0	0	0	0	0
IGHV1-18	F	x	x	IGHJ4	F	IGHG4	F	CARVGHGFDFW	in-frame	1476	0	0	0	0	0	1476	0	0	0	0
IGHV2-5	F	IGHD3-9	F	IGHJ4	F	IGHG1	F	CRYGGYFDWSIDSW	in-frame	1467	0	0	1467	0	0	0	0	0	0	0
IGHV3-15	F	x	x	IGHJ3	F	IGHG2	F	CTHWSYSAFDIW	in-frame	1437	0	1437	0	0	0	0	0	0	0	0
IGHV2-5	F	x	x	IGHJ4	F	IGHG2	F	CAHRRDYNGNWDGGSLDYW	in-frame	1436	0	0	0	0	0	0	0	0	1436	0
IGHV3-33	F	x	x	IGHJ2	F	IGHG2	F	CARARADWSLDLW	in-frame	1428	0	0	1428	0	0	0	0	0	0	0
IGHV2-70,IGHV2-70D	F	IGHD3-10	F	IGHJ4	F	IGHG2	F	CAHLFNTYYSGSGSYYNFDQW	in-frame	1367	0	0	0	0	1367	0	0	0	0	0
IGHV1-8	F	x	x	IGHJ5,IGHJ4	F	IGHG1	F	CARVRAYRYSFSWGFW	in-frame	1358	0	0	0	0	0	0	1358	0	0	0
IGHV3-23D	F	IGHD6-19	F	IGHJ1	F	IGHG2	F	CAKDWTPPNTSGWFPQYFQHW	in-frame	1340	0	0	0	0	0	0	0	1340	0	0
IGHV1-18	F	IGHD3-10	F	IGHJ4	F	IGHG4	F	CARDYGRGSSLDYW	in-frame	1304	0	0	0	0	0	0	0	0	1304	0
IGHV4-30-4	F	x	x	IGHJ4	F	IGHG2	F	CARDRGGDYRPFDYW	in-frame	1295	0	1295	0	0	0	0	0	0	0	0
IGHV3-74	F	x	x	IGHJ5	F	IGHG2	F	CAREASRHQLPNNWFDPW	in-frame	1295	0	0	0	0	0	0	1295	0	0	0
IGHV3/OR16-9	ORF	x	x	IGHJ4	F	IGHG2	F	CLAGYSSSGAYW	in-frame	1278	1278	0	0	0	0	0	0	0	0	0
IGHV3-49	F	x	x	IGHJ4	F	IGHG2	F	CTRYVGFTDYW	in-frame	1266	0	0	0	0	0	0	1266	0	0	0
IGHV5-51	F	x	x	IGHJ4	F	IGHG2	F	CARQPFYSNTWYW	in-frame	1260	0	0	0	0	0	0	1260	0	0	0
IGHV3-33	F	IGHD3-10	F	IGHJ4	F	IGHG2	F	CAKSDGSGSYDDFW	in-frame	1226	0	0	0	0	0	0	0	0	1226	0
IGHV3-15	F	x	x	IGHJ3	F	IGHG2	F	CTTDPQWGIW	in-frame	1177	0	1177	0	0	0	0	0	0	0	0
IGHV1-69	F	x	x	IGHJ4	F	IGHG2	F	CARSIPDSVCRGYCGYFDQW	in-frame	1162	0	0	0	0	0	0	0	0	0	1162
IGHV2-5	F	x	x	IGHJ4	F	IGHG2	F	CARRAILPGAWDVGFFDHW	in-frame	1158	0	0	0	0	0	0	0	0	1158	0
IGHV3-15	F	x	x	IGHJ5	F	IGHG2	F	CTTVSTIDHW	in-frame	1157	0	0	1157	0	0	0	0	0	0	0
IGHV3-33	F	x	x	IGHJ4	F	IGHG4	F	CAKSRGGGYLGSLDYW	in-frame	1154	0	1154	0	0	0	0	0	0	0	0
IGHV3-9	F	IGHD2-2	F	IGHJ3	F	IGHG2	F	CAKDVSPDIVVVPAAIGHDAFDMW	in-frame	1147	0	0	0	0	0	0	0	1147	0	0
IGHV3-53,IGHV3-33	F	x	x	IGHJ4	F	IGHG2	F	CARDDCTTTSCYGHW	in-frame	1133	0	0	0	0	1133	0	0	0	0	0
IGHV2-5	F	x	x	IGHJ4	F	IGHG2	F	CAHSDWEQPFDSW	in-frame	1076	0	0	0	0	0	0	0	1076	0	0
IGHV5-51	F	x	x	IGHJ3	F	IGHG1	F	CARRGSGHGFDIW	in-frame	1066	0	0	0	1066	0	0	0	0	0	0
IGHV3-15	F	x	x	IGHJ5	F	IGHG2	F	CTSFRRTW	in-frame	1023	0	0	0	0	0	0	1023	0	0	0
IGHV2-26	F	IGHD6-19	F	IGHJ4	F	IGHG4	F	CARTNFRGWLVRTNPFDVW	in-frame	1007	0	0	0	0	0	1007	0	0	0	0
IGHV4-34	F	IGHD6-13	F	IGHJ1	F	IGHG2	F	CARGRTAAVGTSEYFHHW	in-frame	1002	1002	0	0	0	0	0	0	0	0	0
IGHV2-70D,IGHV2-70	F	x	x	IGHJ4	F	IGHG1	F	CARMRDAYYPDSTGHYYFDQW	in-frame	988	0	0	0	0	0	988	0	0	0	0
IGHV3-23D	F	IGHD3-10	F	IGHJ4	F	IGHG2	F	CAKSDGSGSYDDYW	in-frame	987	0	0	0	0	0	0	0	0	987	0
IGHV2-5	F	x	x	IGHJ4	F	IGHG2	F	CAHMRSTMTTGDLDFW	in-frame	972	0	0	0	0	0	972	0	0	0	0
IGHV3-15	F	x	x	IGHJ4	F	IGHG2	F	CTTWSYSRFEYW	in-frame	962	0	962	0	0	0	0	0	0	0	0
IGHV3-33	F	x	x	IGHJ4	F	IGHG1	F	CAKCEAAADLGFDYW	in-frame	957	0	0	0	0	0	0	0	0	957	0
IGHV3-33,IGHV3-NL1	F	x	x	IGHJ6	F	IGHG2	F	CGKTGYYWLREYYYYGISVW	in-frame	953	0	0	953	0	0	0	0	0	0	0
IGHV3-23D	F	x	x	IGHJ5	F	IGHG2	F	CAKDPHEVITARGFDAW	in-frame	949	949	0	0	0	0	0	0	0	0	0
IGHV2-5	F	x	x	IGHJ4	F	IGHG1	F	CARFSPDPSGYGEHPFDFW	in-frame	922	0	0	0	0	0	0	922	0	0	0
IGHV4-59,IGHV4-61	F	IGHD1/OR15-1b,IGHD1/OR15-1a,IGHD1-7,IGHD1-20	ORF	IGHJ5	F	IGHG1	F	CARYNWKDAWFDPW	in-frame	913	0	0	0	0	0	0	0	0	913	0
IGHV3-74	F	x	x	IGHJ4	F	IGHG2	F	CARGSRAGISRPLDHW	in-frame	904	0	904	0	0	0	0	0	0	0	0
IGHV3-72	F	IGHD2-15	F	IGHJ4	F	IGHG2	F	CARDLYCSGGNCNGHGYW	in-frame	901	0	901	0	0	0	0	0	0	0	0
IGHV3-15	F	x	x	IGHJ4	F	IGHG2	F	CTSRVITTNDHW	in-frame	888	0	888	0	0	0	0	0	0	0	0
IGHV3-23D	F	IGHD3-10	F	IGHJ3	F	IGHG2	F	CVKDGGVRGVNDAFDIW	in-frame	879	0	879	0	0	0	0	0	0	0	0
IGHV3-9	F	x	x	IGHJ4	F	IGHG2	F	CIKEVQNGGLDYW	in-frame	871	0	0	0	871	0	0	0	0	0	0
IGHV3-9	F	x	x	IGHJ6	F	IGHG2	F	CARVRAPGGNLNFYYGMDVW	in-frame	848	848	0	0	0	0	0	0	0	0	0
IGHV3-15	F	x	x	IGHJ6	F	IGHG1	F	CNWDDHNGMDVW	in-frame	840	0	0	0	0	0	0	840	0	0	0
IGHV3-72	F	x	x	IGHJ3	F	IGHG2	F	CAREISGAFDIW	in-frame	839	0	839	0	0	0	0	0	0	0	0
IGHV4-39	F	IGHD6-19	F	IGHJ4	F	IGHG1	F	CARPGSSGWLYYFQYW	in-frame	834	0	0	834	0	0	0	0	0	0	0
IGHV3-74	F	x	x	IGHJ2	F	IGHG1	F	CARGRRIQLKAYWYFDLW	in-frame	821	0	0	821	0	0	0	0	0	0	0
IGHV2-26	F	x	x	IGHJ4	F	IGHG2	F	CARRYSDDFWAFDNW	in-frame	821	0	0	0	0	0	0	821	0	0	0
IGHV3-7,IGHV3-69-1,IGHV3-48,IGHV3-21	F	x	x	IGHJ4	F	IGHG2	F	CARLQRGINYLDKTGPAYFDYW	in-frame	819	0	819	0	0	0	0	0	0	0	0
IGHV5-51	F	x	x	IGHJ4	F	IGHG2	F	CAKLSSPGNTCIGAPRYFVSLRCYFDDW	in-frame	802	0	0	0	0	0	0	0	0	802	0
IGHV3-11	F	IGHD2/OR15-2b,IGHD2/OR15-2a	ORF	IGHJ4	F	IGHG2	F	CARGGPWELLAKYYFDLW	in-frame	802	0	0	0	0	0	802	0	0	0	0
IGHV3-21	F	x	x	IGHJ4	F	IGHG1	F	CARDVGYLDYW	in-frame	788	0	0	0	0	0	0	788	0	0	0
IGHV3-23D	F	x	x	IGHJ4	F	IGHG2	F	CARALGSIDPFDSW	in-frame	783	0	783	0	0	0	0	0	0	0	0
IGHV3-15	F	x	x	IGHJ6	F	IGHG2	F	CTTGPYGDTGPYGSDVW	in-frame	779	0	0	0	779	0	0	0	0	0	0
IGHV4-61,IGHV4-59	F	x	x	IGHJ5	F	IGHG2	F	CARMGEVPWNWFDPW	in-frame	768	0	0	0	0	0	0	0	0	768	0
IGHV3-74	F	x	x	IGHJ4	F	IGHG2	F	CSRDTFGMEDFW	in-frame	765	0	0	0	0	0	0	0	0	765	0
IGHV3-9	F	x	x	IGHJ4	F	IGHG1	F	CAKDTRPHLSHSLIDSW	in-frame	763	0	0	0	0	0	0	0	763	0	0
IGHV4-34,IGHV4-31	F	IGHD3-10	F	IGHJ4	F	IGHG2	F	CATWKDYYGLWEDYW	in-frame	762	0	0	0	0	0	0	762	0	0	0
IGHV2-5	F	IGHD5-12	F	IGHJ4	F	IGHG2	F	CAHTSGYDFDYW	in-frame	761	0	0	0	761	0	0	0	0	0	0
IGHV3-23D	F	x	x	IGHJ5	F	IGHG1	F	CAKAPIQLGLNWFDSW	in-frame	755	0	0	0	0	0	0	0	0	0	755
IGHV2-70,IGHV2-5	F	x	x	IGHJ4	F	IGHG2	F	CAHRRLIGGIGFDYW	in-frame	750	0	0	0	0	0	0	0	0	750	0
IGHV3-23D	F	x	x	IGHJ4	F	IGHG2	F	CAKDPRVQRYFDYW	in-frame	746	0	0	0	0	0	0	0	746	0	0
IGHV3-33	F	IGHD6-19	F	IGHJ4	F	IGHG2	F	CVRDDRHSSGWHFDYW	in-frame	734	0	734	0	0	0	0	0	0	0	0
IGHV3-9	F	IGHD5-5,IGHD5-18	F	IGHJ5	F	IGHG1	F	CAKDRYSYGSGWFDPW	in-frame	731	0	731	0	0	0	0	0	0	0	0
IGHV3-53	F	IGHD3-22	F	IGHJ4	F	IGHG2	F	CTRDGRDQYDRSGARGAFDYW	in-frame	730	0	730	0	0	0	0	0	0	0	0
IGHV3-48	F	IGHD4-17	F	IGHJ1	F	IGHG2	F	CATRVDYGDFGRGVCDFW	in-frame	730	730	0	0	0	0	0	0	0	0	0
IGHV2-5	F	IGHD4-23	ORF	IGHJ1	F	IGHG1	F	CAHDYGGNSLANW	in-frame	720	0	0	0	0	0	0	720	0	0	0
IGHV3-43	F	x	x	IGHJ5,IGHJ4	F	IGHG2	F	CAKETRGSKWLVREW	in-frame	710	0	0	0	0	0	710	0	0	0	0
IGHV2-70,IGHV2-5	F	x	x	IGHJ4	F	IGHG1	F	CARSRRGAFSEVSGYFFDVW	in-frame	701	0	0	0	0	0	0	0	0	701	0
IGHV3-49	F	IGHD2-21	F	IGHJ6	F	IGHG1	F	CSRDSPCGADCRDFDSYYMDVW	in-frame	699	0	0	0	0	0	0	699	0	0	0
IGHV2-26	F	IGHD6-19	F	IGHJ3	F	IGHG1	F	CARVMYRNGWYPAFDIW	in-frame	698	0	0	0	0	0	698	0	0	0	0
IGHV3-15	F	x	x	IGHJ4	F	IGHG2	F	CTTPYIISSGWGVDYW	in-frame	694	694	0	0	0	0	0	0	0	0	0
IGHV3-48	F	x	x	IGHJ4	F	IGHG2	F	CAKDVTYPNSWPYFDNW	in-frame	692	0	692	0	0	0	0	0	0	0	0
IGHV3-15	F	IGHD6-19	F	IGHJ5	F	IGHG2	F	CNTGVGQWLVRDSW	in-frame	683	0	683	0	0	0	0	0	0	0	0
IGHV1-8	F	x	x	IGHJ5	F	IGHG2	F	CARALRYQLLSDSW	in-frame	680	0	0	0	0	0	0	0	0	680	0
IGHV2-5	F	IGHD3-9	F	IGHJ4	F	IGHG2	F	CRYGGYFDWSIDSW	in-frame	674	0	0	674	0	0	0	0	0	0	0
IGHV4-39	F	IGHD6-13	F	IGHJ5	F	IGHG2	F	CARLYAPVAAASDNGWFDPW	in-frame	672	0	0	0	0	0	0	672	0	0	0
IGHV3-23D	F	x	x	IGHJ4	F	IGHG2	F	CAKGRESSDWYRWAIDYW	in-frame	668	0	0	0	0	0	0	0	668	0	0
IGHV2-5	F	x	x	IGHJ4	F	IGHG1	F	CVRRSFDYYDDSGPTYDNW	in-frame	666	0	0	0	0	0	666	0	0	0	0
IGHV3-23D	F	IGHD3-10	F	IGHJ4	F	IGHG2	F	CAKSDASGSYDDFW	in-frame	665	0	0	0	0	0	0	0	0	665	0
IGHV7-4-1	F	x	x	IGHJ4	F	IGHG1	F	CAREIVDFW	in-frame	658	0	0	0	0	0	0	0	0	658	0
IGHV1-18	F	x	x	IGHJ4	F	IGHG2	F	CARDQAGRQWLPLDYW	in-frame	654	0	0	0	0	0	0	0	0	654	0
IGHV2-26	F	x	x	IGHJ6	F	IGHG2	F	CAHFLVVEAPRYYYCVDVW	in-frame	653	0	0	0	0	0	0	0	0	653	0
IGHV4-39	F	x	x	IGHJ5	F	IGHG1	F	CARRQDPVTTRGVARKVNWFDPW	in-frame	652	0	0	0	0	0	0	0	0	652	0
IGHV1-3	F	x	x	IGHJ4	F	IGHG2	F	CARATFGKSIMDYW	in-frame	637	0	637	0	0	0	0	0	0	0	0
IGHV3-33,IGHV3-NL1	F	x	x	IGHJ6	F	IGHG2	F	CGKSGYYWLREYYYYGMNVW	in-frame	618	0	0	618	0	0	0	0	0	0	0
IGHV2-5	F	x	x	IGHJ4	F	IGHG2	F	CAHKGIGAWTNFDSW	in-frame	615	0	0	0	0	0	0	615	0	0	0
IGHV3-33	F	x	x	IGHJ4	F	IGHG1	F	CARGGRGSDYW	in-frame	607	0	0	0	0	0	0	607	0	0	0
IGHV1-18	F	IGHD5-12	F	IGHJ4	F	IGHG1	F	CARAGSRQWLRPLDYW	in-frame	607	0	0	0	0	0	0	0	0	607	0
IGHV4-61	F	IGHD3-10	F	IGHJ4	F	IGHG1	F	CARAATRLTMLRNIIIYYFDYW	in-frame	604	0	0	0	0	0	0	0	0	604	0
IGHV1-3	F	x	x	IGHJ4	F	IGHG1	F	CLRGSTWPPRGDYW	in-frame	603	0	0	0	0	0	603	0	0	0	0
IGHV1-69D	F	IGHD4-17	F	IGHJ4	F	IGHG1	F	CARAGTYGDYYFDYW	in-frame	599	0	599	0	0	0	0	0	0	0	0
IGHV2-5	F	x	x	IGHJ5	F	IGHG2	F	CAHMSGWVADQW	in-frame	598	0	0	0	598	0	0	0	0	0	0
IGHV1-18	F	x	x	IGHJ4	F	IGHG1	F	CARTARPYFDYW	in-frame	593	0	0	0	0	0	0	0	593	0	0
IGHV3-53	F	x	x	IGHJ4	F	IGHG2	F	CVRIYDYPGRGDPYYFDDW	in-frame	592	0	0	0	0	0	592	0	0	0	0
IGHV3-53	F	IGHD3-22	F	IGHJ4	F	IGHG1	F	CARPDYYDSSGYYPNFDYW	in-frame	588	0	0	0	0	0	0	588	0	0	0
IGHV3-15	F	x	x	IGHJ5	F	IGHG2	F	CTTFRRTW	in-frame	587	0	0	0	0	0	0	587	0	0	0
IGHV3-15	F	x	x	IGHJ5	F	IGHG2	F	CNIPVGQWGVRDSW	in-frame	586	0	586	0	0	0	0	0	0	0	0
IGHV4-61	F	x	x	IGHJ4	F	IGHG1	F	CAREVPRSTDYIDYW	in-frame	585	0	0	0	585	0	0	0	0	0	0
IGHV3-23D,IGHV3-23	F	x	x	IGHJ3	F	IGHG2	F	CAKDGGLREVDDSFDIW	in-frame	584	0	584	0	0	0	0	0	0	0	0
IGHV3-9	F	x	x	IGHJ6	F	IGHG2	F	CAKGPGFYGMDVW	in-frame	582	0	0	0	582	0	0	0	0	0	0
IGHV3-15	F	x	x	IGHJ4	F	IGHG2	F	CCTRLSGNDWIDYW	in-frame	579	0	579	0	0	0	0	0	0	0	0
IGHV3-9	F	x	x	IGHJ5,IGHJ4	F	IGHG1	F	CAKDIGQPAW	in-frame	571	0	0	0	0	0	0	571	0	0	0
IGHV4-61	F	x	x	IGHJ5	F	IGHG1	F	CARGDVGYGDVGETRRRDEFDIW	in-frame	569	0	0	0	569	0	0	0	0	0	0
IGHV3-15	F	IGHD3-10	F	IGHJ4	F	IGHG2	F	CTTALHYYGSGTYLVGYW	in-frame	566	0	566	0	0	0	0	0	0	0	0
IGHV3-53	F	x	x	IGHJ4	F	IGHG2	F	CARGGSWLDYW	in-frame	563	0	563	0	0	0	0	0	0	0	0
IGHV3-23D	F	x	x	IGHJ4	F	IGHG2	F	CAQGPAWELPNYYFDYW	in-frame	560	0	0	0	0	0	0	560	0	0	0
IGHV3-9	F	x	x	IGHJ5	F	IGHG1	F	CVQDGGLGDHSW	in-frame	558	0	0	0	0	0	0	558	0	0	0
IGHV3-7,IGHV3-69-1,IGHV3-48	F	x	x	IGHJ6	F	IGHG4	F	CARDLSYRVTTGSLDVW	in-frame	558	0	0	0	0	0	558	0	0	0	0
IGHV3-33,IGHV3-NL1	F	IGHD3-22	F	IGHJ5	F	IGHG1	F	CGKDTYDSSGLESW	in-frame	556	0	0	0	0	0	0	556	0	0	0
IGHV2-5	F	x	x	IGHJ4	F	IGHG1	F	CAHWARGAVGMFEYW	in-frame	554	0	0	0	0	0	0	0	0	554	0
IGHV2-5	F	IGHD3-9	F	IGHJ4	F	IGHG1	F	CHYGGYFDWSIDHW	in-frame	554	0	0	554	0	0	0	0	0	0	0
IGHV6-1	F	x	x	IGHJ4	F	IGHG2	F	CARGGITAAPGFDYW	in-frame	548	0	548	0	0	0	0	0	0	0	0
IGHV4-61,IGHV4-59	F	IGHD6-19	F	IGHJ6	F	IGHG1	F	CARDRYSSGWYGGDYYYGMDVW	in-frame	548	0	0	0	0	0	0	548	0	0	0
IGHV4-39	F	x	x	IGHJ6	F	IGHG1	F	CARHGPIDYYGMDVW	in-frame	548	0	548	0	0	0	0	0	0	0	0
IGHV4-61	F	x	x	IGHJ4	F	IGHG2	F	CARLGSYHDYW	in-frame	547	0	0	0	0	0	0	547	0	0	0
IGHV4-61	F	IGHD2-21	F	IGHJ4	F	IGHG2	F	CARVRYCGGDCYQIDYW	in-frame	546	0	0	0	0	0	546	0	0	0	0
IGHV3-48	F	IGHD3-22	F	IGHJ3	F	IGHG4	F	CARDPPYYYDWEGTFDVW	in-frame	545	0	0	0	0	0	545	0	0	0	0
IGHV3-23D	F	x	x	IGHJ4	F	IGHG2	F	CAKGGSILGLTRRFEYW	in-frame	539	0	0	0	0	0	0	539	0	0	0
IGHV3-66	F	x	x	IGHJ4	F	IGHG2	F	CSTANPRNPFFDDW	in-frame	537	0	0	0	537	0	0	0	0	0	0
IGHV4-30-2	F	IGHD2-2	F	IGHJ4	F	IGHG2	F	CARARPADVVVPAREFFDYW	in-frame	536	0	536	0	0	0	0	0	0	0	0
IGHV3-15	F	x	x	IGHJ4	F	IGHG2	F	CSIPWGKGENDYW	in-frame	536	536	0	0	0	0	0	0	0	0	0
IGHV3-33	F	x	x	IGHJ4	F	IGHG2	F	CAKDPHGDFFDYW	in-frame	534	0	0	0	0	0	0	0	0	534	0
IGHV3-23D	F	IGHD6-6,IGHD2/OR15-2b,IGHD2/OR15-2a	F	IGHJ4	F	IGHG1	F	CVKRSAARPEYYFDYW	in-frame	527	0	1	0	0	0	0	0	526	0	0
IGHV2-5	F	IGHD6-19	F	IGHJ4	F	IGHG1	F	CARRPGGGRSGSGWYIYFDYW	in-frame	527	0	0	0	0	0	0	0	0	527	0
IGHV2-70D,IGHV2-70	F	IGHD3-22	F	IGHJ4	F	IGHG1	F	CARMRDAFYPDSTGHYYFDQW	in-frame	526	0	0	0	0	0	526	0	0	0	0
IGHV4-39	F	IGHD4-17	F	IGHJ4	F	IGHG2	F	CASGVAEDYGDYETEHFAYW	in-frame	524	0	0	0	0	0	0	0	524	0	0
IGHV3-23D	F	IGHD2-21	F	IGHJ4	F	IGHG2	F	CARGVYCGGDCHRQFDYW	in-frame	522	0	0	0	0	0	0	0	0	522	0
IGHV3-NL1,IGHV3-30-5,IGHV3-30-3,IGHV3-30	F	x	x	IGHJ4	F	IGHG1	F	CAKELLDVGALINW	in-frame	521	0	521	0	0	0	0	0	0	0	0
IGHV4-39	F	IGHD1-26	F	IGHJ4	F	IGHG2	F	CARLPIVGTTPYYFDYW	in-frame	520	0	0	0	0	0	0	0	520	0	0
IGHV2-26	F	IGHD3-9	F	IGHJ3	F	IGHG1	F	CARMRDDILTGAFDMW	in-frame	517	0	0	0	0	0	0	0	0	517	0
IGHV3-72	F	x	x	IGHJ6	F	IGHG2	F	CARGGAEPNYQYAMDVW	in-frame	516	0	0	0	0	0	0	516	0	0	0
IGHV3-53	F	x	x	IGHJ4	F	IGHG2	F	CARSELLCCFDSW	in-frame	514	0	0	0	0	0	0	514	0	0	0
IGHV3-23D	F	IGHD6-6	F	IGHJ2	F	IGHG1	F	CAKNQGQQLVGDWYFDLW	in-frame	514	0	0	0	0	0	0	0	514	0	0
IGHV3-7,IGHV3-69-1,IGHV3-48,IGHV3-21	F	x	x	IGHJ4	F	IGHG2	F	CLAGYSSSGAFW	in-frame	509	509	0	0	0	0	0	0	0	0	0
IGHV3-9	F	IGHD2-2	F	IGHJ4	F	IGHG1	F	CAKDYYTSCYYIDYW	in-frame	506	0	0	0	0	0	0	0	0	506	0
IGHV5-51	F	IGHD5-5,IGHD5-18	F	IGHJ4	F	IGHG1	F	CARREGAIGYSYYYW	in-frame	505	0	505	0	0	0	0	0	0	0	0
IGHV2-5	F	x	x	IGHJ4	F	IGHG2	F	CARREPDSFDYW	in-frame	504	0	0	0	504	0	0	0	0	0	0
IGHV3-74	F	x	x	IGHJ4	F	IGHG2	F	CARAPGGNLYFDDW	in-frame	503	0	0	0	0	0	503	0	0	0	0
IGHV2-26	F	x	x	IGHJ4	F	IGHG4	F	CARTNFRGWLVRTNPFDVW	in-frame	503	0	0	0	0	0	503	0	0	0	0
IGHV3-7	F	x	x	IGHJ4	F	IGHG4	F	CARGIGPGLVRGVYFDNW	in-frame	502	0	0	0	0	0	502	0	0	0	0
IGHV2-5	F	x	x	IGHJ4	F	IGHG2	F	CAHGTQGLPYYFDYW	in-frame	502	0	0	0	0	0	0	0	502	0	0
IGHV2-5	F	IGHD3-9	F	IGHJ4	F	IGHG1	F	CAHLRDFDWLPATFDYW	in-frame	502	0	0	0	0	0	0	0	0	502	0
IGHV3-53	F	x	x	IGHJ4	F	IGHG1	F	CATGGSYLETTGYFAYW	in-frame	497	0	0	0	0	0	0	497	0	0	0
IGHV2-70D	F	x	x	IGHJ6	F	IGHG1	F	CARTLARPRWLFNDMDVW	in-frame	497	0	0	497	0	0	0	0	0	0	0
IGHV3-9	F	x	x	IGHJ3	F	IGHG4	F	CVKPYAGSLREAFDIW	in-frame	495	0	0	0	0	0	495	0	0	0	0
IGHV3-23D	F	x	x	IGHJ4	F	IGHG1	F	CAKMIHALGDLSHFDSW	in-frame	492	0	0	0	0	0	0	0	0	0	492
IGHV3-23D	F	IGHD3-9	F	IGHJ4	F	IGHG1	F	CAKDGDYDILTGYLKIPYFDYW	in-frame	491	0	491	0	0	0	0	0	0	0	0
IGHV2-70D,IGHV2-70	F	x	x	IGHJ6	F	IGHG2	F	CARAEGVQVPLAPHSWGQSYFYDYYVDVW	in-frame	490	0	0	0	0	0	0	0	0	490	0
IGHV3-74	F	x	x	IGHJ3	F	IGHG2	F	CAKSRGGNDVFDIW	in-frame	487	0	0	0	0	0	487	0	0	0	0
IGHV3-53	F	IGHD6-19	F	IGHJ4	F	IGHG1	F	CARNSGWYGKGYFDYW	in-frame	487	0	0	0	0	0	0	0	487	0	0
IGHV3-9	F	x	x	IGHJ5,IGHJ4	F	IGHG2	F	CVKVGGTQVRGAETHW	in-frame	485	0	485	0	0	0	0	0	0	0	0
IGHV3-23D	F	x	x	IGHJ4	F	IGHG2	F	CARDSQTLDYW	in-frame	484	0	484	0	0	0	0	0	0	0	0
IGHV3-23D	F	IGHD2-2	F	IGHJ3	F	IGHG2	F	CAKDRYCSSTSCYARSDAFDIW	in-frame	484	0	484	0	0	0	0	0	0	0	0
IGHV3-71	P	x	x	IGHJ6	F	IGHG4	F	CARVAWLLGSVYMDVW	in-frame	483	0	0	0	0	0	0	0	0	483	0
IGHV2-5	F	x	x	IGHJ4	F	IGHG2	F	CAYRHYSSAGTFDYW	in-frame	483	0	0	0	483	0	0	0	0	0	0
IGHV1-18	F	IGHD3-16	F	IGHJ4	F	IGHG1	F	CARDLGLRLEELSVYESW	in-frame	483	0	0	0	0	0	0	0	0	483	0
IGHV3-9	F	x	x	IGHJ4	F	IGHG1	F	CAKDTQYLALAGNFDYW	in-frame	481	0	0	481	0	0	0	0	0	0	0
IGHV3-11	F	x	x	IGHJ5	F	IGHG2	F	CARGGRTHFDPW	in-frame	480	0	480	0	0	0	0	0	0	0	0
IGHV4-61,IGHV4-59	F	x	x	IGHJ6	F	IGHG2	F	CARDASYGLDVW	in-frame	479	0	0	0	0	0	0	0	0	479	0
IGHV3-9	F	IGHD3-10	F	IGHJ6	F	IGHG2	F	CAKVIYYDSESYLFYGMDVW	in-frame	479	0	0	0	0	0	0	0	0	479	0
IGHV3-23D	F	IGHD3-3	F	IGHJ3	F	IGHG1	F	CAKILPPYYDFWPDAFDIW	in-frame	479	0	0	0	0	0	0	0	479	0	0
IGHV3-23D	F	x	x	IGHJ5	F	IGHG1	F	CAKPPPVGVRFLFDPW	in-frame	478	0	0	0	0	0	0	0	0	478	0
IGHV3-23D	F	x	x	IGHJ1	F	IGHG2	F	CKKAALSSSAGAW	in-frame	477	0	477	0	0	0	0	0	0	0	0
IGHV7-4-1	F	x	x	IGHJ6	F	IGHG2	F	CARSRGMTADFHYSGMDVW	in-frame	475	0	0	0	0	0	0	475	0	0	0
IGHV3-69-1	P	IGHD4-23	ORF	IGHJ4	F	IGHG2	F	CARVLYGGNTNGYFDHW	in-frame	474	0	0	0	0	0	0	0	0	474	0
IGHV3-15	F	x	x	IGHJ4	F	IGHG2	F	CTSRVVTTNDYW	in-frame	473	0	473	0	0	0	0	0	0	0	0
IGHV2-70	ORF	x	x	IGHJ6	F	IGHG1	F	CARCIQGEYYYYYMDVW	in-frame	473	0	0	0	0	0	0	0	473	0	0
IGHV3-15	F	IGHD3-16	F	IGHJ4	F	IGHG3	F	CTTRQPDYVWGSYRPPGYW	in-frame	472	0	0	0	0	0	472	0	0	0	0
IGHV3-33	F	x	x	IGHJ2	F	IGHG2	F	CAKELPCEPGVCVSAGHFDLW	in-frame	470	0	0	0	0	0	0	0	0	470	0
IGHV2-5	F	x	x	IGHJ4	F	IGHG1	F	CARRLTRVAFDYW	in-frame	469	0	0	0	0	0	0	0	469	0	0
IGHV2-5	F	x	x	IGHJ4,IGHJ5	F	IGHG2	F	CAHTSAKWEINFDPW	in-frame	466	0	0	0	0	0	0	0	0	466	0
IGHV4-34,IGHV4-31	F	IGHD6-13	F	IGHJ4	F	IGHG3	F	CARNVWGYSSSWYGYFDYW	in-frame	462	0	462	0	0	0	0	0	0	0	0
IGHV3-15	F	x	x	IGHJ5	F	IGHG2	F	CTAGIGDSW	in-frame	462	0	0	0	0	0	462	0	0	0	0
IGHV3-7,IGHV3-21,IGHV3-11	F	x	x	IGHJ5	F	IGHG2	F	CARDRSGSSRGWFDPW	in-frame	459	0	0	0	0	0	0	0	0	0	459
IGHV3-23D	F	IGHD6-19	F	IGHJ5	F	IGHG2	F	CAKEHSSGWSW	in-frame	457	0	0	0	0	0	0	0	0	457	0
IGHV2-26	F	x	x	IGHJ6	F	IGHG1	F	CARTRFLTRGVAIHYYMDVW	in-frame	457	0	0	0	0	0	0	0	457	0	0
IGHV5-51	F	x	x	IGHJ5	F	IGHG1	F	CASQGRNYGAPGPW	in-frame	456	0	0	0	0	0	0	0	0	456	0
IGHV4-39	F	IGHD4-17	F	IGHJ5	F	IGHG3	F	CARKIPHDYGDYAEWFDPW	in-frame	456	0	456	0	0	0	0	0	0	0	0
IGHV3-15	F	x	x	IGHJ4	F	IGHG2	F	CTTRWFHAYTGPLPKGDYW	in-frame	456	0	0	0	0	0	0	0	0	456	0
IGHV3-7	F	x	x	IGHJ4	F	IGHG1	F	CLAGYSSSGAYW	in-frame	454	454	0	0	0	0	0	0	0	0	0
IGHV3-23D	F	x	x	IGHJ1	F	IGHG2	F	CARGSIRLGVTDYFHHW	in-frame	453	0	0	0	0	0	0	0	0	0	453
IGHV4-30-4	F	x	x	IGHJ4	F	IGHG3	F	CATGTNKGDDFFDSRGFDYW	in-frame	450	0	450	0	0	0	0	0	0	0	0
IGHV3-53	F	IGHD2-15	F	IGHJ4	F	IGHG2	F	CARGPPYCSGGSCYSRAPDYW	in-frame	450	0	0	0	0	0	450	0	0	0	0
IGHV2-26	F	x	x	IGHJ3	F	IGHG1	F	CARNPGHLIGDGFDVW	in-frame	450	0	0	0	0	0	0	0	450	0	0
IGHV1-46	F	x	x	IGHJ4	F	IGHG2	F	CARSIPDSVCRGYCGYFDRW	in-frame	450	0	0	0	0	0	0	0	0	0	450
IGHV1-3	F	IGHD3-22	F	IGHJ5,IGHJ4	F	IGHG1	F	CATVDYYDNGGPYRSW	in-frame	449	0	0	0	0	0	0	0	449	0	0
IGHV3-NL1,IGHV3-30-5,IGHV3-30-3,IGHV3-30	F	x	x	IGHJ6	F	IGHG2	F	CAKDVTYSLSAGMDVW	in-frame	448	0	0	0	448	0	0	0	0	0	0
IGHV3-20	ORF	IGHD3-3	F	IGHJ4	F	IGHG1	F	CARAPRVTIFGVFIDW	in-frame	448	0	0	0	0	0	0	0	0	0	448
IGHV3-49	F	x	x	IGHJ1	F	IGHG1	F	CTTYSGRSWYVFHHW	in-frame	447	447	0	0	0	0	0	0	0	0	0
IGHV3-48	F	x	x	IGHJ5	F	IGHG2	F	CARAEDGSDIWIDPW	in-frame	447	0	447	0	0	0	0	0	0	0	0
IGHV3-7	F	x	x	IGHJ4	F	IGHG2	F	CGLWSYSRFDYW	in-frame	446	0	445	0	1	0	0	0	0	0	0
IGHV3-7	F	x	x	IGHJ3	F	IGHG2	F	CARELGYSSGHGAFEIW	in-frame	446	0	446	0	0	0	0	0	0	0	0
IGHV3-13	F	x	x	IGHJ6	F	IGHG1	F	CARAPSRYSGKYSYYYFMDVW	in-frame	446	0	0	0	0	0	0	0	0	446	0
IGHV3-74	F	x	x	IGHJ3	F	IGHG2	F	CAKGGHYVLHALDMW	in-frame	445	0	445	0	0	0	0	0	0	0	0
IGHV3-23D	F	IGHD3-16	F	IGHJ4	F	IGHG2	F	CAKFTIQLGDLSFFDSW	in-frame	445	0	0	0	0	0	0	0	0	0	445
IGHV7-4-1	F	x	x	IGHJ6	F	IGHG2	F	CARKKGGMDVW	in-frame	444	0	0	0	0	0	0	0	444	0	0
IGHV1-18	F	x	x	IGHJ5	F	IGHG1	F	CARGQSYYPSW	in-frame	443	0	0	443	0	0	0	0	0	0	0
IGHV3-72	F	x	x	IGHJ3	F	IGHG2	F	CVREIGGSFDIW	in-frame	442	0	442	0	0	0	0	0	0	0	0
IGHV3-43	F	x	x	IGHJ4	F	IGHG2	F	CATERQRFFDHW	in-frame	442	442	0	0	0	0	0	0	0	0	0
IGHV1-3	F	x	x	IGHJ4	F	IGHG2	F	CARDPPGVNFDYW	in-frame	442	0	0	0	0	0	442	0	0	0	0
IGHV3-7	F	x	x	IGHJ4	F	IGHG2	F	CSFDLRGPSGYW	in-frame	441	0	0	0	0	0	0	0	0	441	0
IGHV2-5	F	x	x	IGHJ4	F	IGHG1	F	CAHRSEWLRNFDYW	in-frame	441	0	0	0	0	0	0	0	441	0	0
IGHV3-7	F	x	x	IGHJ5	F	IGHG2	F	CARGTTLGLPNNWFDAW	in-frame	440	0	0	0	0	0	0	440	0	0	0
IGHV2-70,IGHV2-26	F	x	x	IGHJ4	F	IGHG1	F	CARSYFSGWLRRTNPFDFW	in-frame	440	0	0	0	0	0	440	0	0	0	0
IGHV5-51	F	x	x	IGHJ5	F	IGHG1	F	CARRGGRRNLCNGGSCFDSW	in-frame	438	0	0	0	0	0	0	438	0	0	0
IGHV4-59	F	x	x	IGHJ5	F	IGHG1	F	CAGGSFYDSDYSETYYWFDPW	in-frame	436	0	0	0	0	0	0	0	436	0	0
IGHV4-59	F	x	x	IGHJ4	F	IGHG2	F	CARGHGFVSYW	in-frame	436	0	0	436	0	0	0	0	0	0	0
IGHV2-5	F	x	x	IGHJ5,IGHJ4	F	IGHG2	F	CAHSGAGIW	in-frame	436	0	0	0	0	0	0	0	436	0	0
IGHV4-34,IGHV4-39	F	x	x	IGHJ5	F	IGHG1	F	CARRQDPVTTRGVARKVNWFDPW	in-frame	434	0	0	0	0	0	0	0	0	434	0
IGHV3-23D	F	x	x	IGHJ5	F	IGHG2	F	CAKIDSDYRHRRRSGRGGWFDSW	in-frame	434	434	0	0	0	0	0	0	0	0	0
IGHV4-61	F	IGHD4-4,IGHD4-11	F	IGHJ5	F	IGHG2	F	CARQPRGMSTVTTQYNWFDPW	in-frame	431	0	0	0	0	0	0	0	431	0	0
IGHV2-5	F	x	x	IGHJ6	F	IGHG4	F	CVRLNSTAGVDVW	in-frame	431	0	0	0	0	0	0	0	0	0	431
IGHV2-5	F	x	x	IGHJ6	F	IGHG1	F	CAHLRFTASGGGMDVW	in-frame	431	0	0	0	0	0	0	0	431	0	0
IGHV2-5	F	x	x	IGHJ4	F	IGHG1	F	CAHRWQRHFDYW	in-frame	430	0	0	0	0	430	0	0	0	0	0
IGHV3-23D	F	x	x	IGHJ6	F	IGHG2	F	CAKAGKDFYYGMDVW	in-frame	429	429	0	0	0	0	0	0	0	0	0
IGHV3-15	F	x	x	IGHJ4	F	IGHG2	F	CTTWDYSRFEYW	in-frame	428	0	428	0	0	0	0	0	0	0	0
IGHV2-5	F	x	x	IGHJ4	F	IGHG1	F	CAQMSTIYYFDSW	in-frame	428	0	0	0	0	0	0	0	0	428	0
IGHV7-4-1	F	x	x	IGHJ5	F	IGHG2	F	CARVIGNPYYHGSGAYYYFDPW	in-frame	427	0	0	0	0	0	427	0	0	0	0
IGHV4-34,IGHV4-31	F	x	x	IGHJ4	F	IGHG1	F	CARVNSPHYYQTSGEDYW	in-frame	425	0	0	0	0	0	425	0	0	0	0
IGHV3-23	F	x	x	IGHJ3	F	IGHG1	F	CAKNSHWLTLRDAFDVW	in-frame	424	0	0	0	0	0	0	0	424	0	0
IGHV3-9	F	x	x	IGHJ3	F	IGHG2	F	CAKDVNNWFPYDALDLW	in-frame	423	0	0	0	0	0	0	423	0	0	0
IGHV4-34,IGHV4-31	F	IGHD2-15	F	IGHJ4	F	IGHG1	F	CARQHCSGGSCYYPLFDYW	in-frame	422	0	422	0	0	0	0	0	0	0	0
IGHV3-73	F	x	x	IGHJ6	F	IGHG1	F	CTRRSSSGGGLWGLWDFYSKGMDVW	in-frame	422	0	0	0	0	0	422	0	0	0	0
IGHV4-61,IGHV4-59	F	x	x	IGHJ4	F	IGHG1	F	CARFNVDAVATIDSW	in-frame	421	0	0	0	0	0	0	421	0	0	0
IGHV3-23D	F	x	x	IGHJ5	F	IGHG2	F	CARMPWFEQPRW	in-frame	421	0	0	0	0	0	0	0	0	421	0
IGHV2-5	F	x	x	IGHJ4	F	IGHG2	F	CAHSVVLYPQYFDYW	in-frame	421	0	0	0	421	0	0	0	0	0	0
IGHV4-59	F	x	x	IGHJ5	F	IGHG2	F	CARGGAISFGPW	in-frame	420	420	0	0	0	0	0	0	0	0	0
IGHV3-9	F	x	x	IGHJ6	F	IGHG1	F	CVKAADPRYYMDVW	in-frame	420	0	0	0	0	0	0	0	420	0	0
IGHV2-70	F	IGHD3-10	F	IGHJ6	F	IGHG1	F	CTRMMVVRGTRAYFSGMDVW	in-frame	419	0	0	0	0	0	0	0	0	419	0
IGHV4-61,IGHV4-59	F	IGHD3-22	F	IGHJ4	F	IGHG2	F	CAREGYYDSRGYYLGYW	in-frame	418	0	0	0	0	0	0	0	0	418	0
IGHV3-9	F	x	x	IGHJ4	F	IGHG1	F	CAKAGGGGNYSPDFW	in-frame	418	0	0	0	0	0	0	418	0	0	0
IGHV1-69D	F	x	x	IGHJ5	F	IGHG1	F	CARSPVPMYGASMGYNWFDPW	in-frame	418	0	0	0	0	0	0	0	0	418	0
IGHV4/OR15-8	ORF	x	x	IGHJ4	F	IGHG2	F	CARGGGHLSNW	in-frame	416	0	416	0	0	0	0	0	0	0	0
IGHV4-39	F	IGHD5-12	F	IGHJ4	F	IGHG1	F	CTRSRYSGYDWDYW	in-frame	415	0	0	0	0	0	0	0	415	0	0
IGHV2-5	F	x	x	IGHJ4	F	IGHG1	F	CAHRRGELRLFDYW	in-frame	414	0	0	0	0	0	0	0	413	1	0
IGHV3-66	F	x	x	IGHJ5	F	IGHG2	F	CARDLSGTGSSNWYIRGGFDPW	in-frame	412	0	412	0	0	0	0	0	0	0	0
IGHV2-5	F	x	x	IGHJ4	F	IGHG2	F	CARTVQPRVLINW	in-frame	412	412	0	0	0	0	0	0	0	0	0
IGHV1-18	F	IGHD6-19	F	IGHJ2	F	IGHG3	F	CARDAGSGWYPWFFDLW	in-frame	412	0	0	0	0	412	0	0	0	0	0
IGHV4-59	F	IGHD1/OR15-1b,IGHD1/OR15-1a,IGHD1-7,IGHD1-20	ORF	IGHJ5	F	IGHG1	F	CARYNWKDAWFDPW	in-frame	411	0	0	0	0	0	0	0	0	411	0
IGHV3-23D	F	IGHD3-22	F	IGHJ4	F	IGHG1	F	CANRRYDSSGYYPAPFDYW	in-frame	411	0	0	0	0	0	0	0	0	411	0
IGHV3-64D	F	IGHD2-15	F	IGHJ4,IGHJ1	F	IGHG1	F	CVGTLAYCPGGSCLGVYW	in-frame	410	0	0	0	0	0	0	410	0	0	0
IGHV3-23D	F	x	x	IGHJ1	F	IGHG1	F	CAKDGGYLIEVGTGFQYW	in-frame	410	0	0	0	0	0	0	0	0	410	0
IGHV2-70	ORF	IGHD3-16	F	IGHJ4	F	IGHG1	F	CVRVSVRNYDYFWGSYRPFWFDYW	in-frame	409	0	0	0	0	0	409	0	0	0	0
IGHV5-51	F	x	x	IGHJ4	F	IGHG1	F	CARRGPAGVFDYW	in-frame	408	0	408	0	0	0	0	0	0	0	0
IGHV4-34,IGHV4-31	F	x	x	IGHJ5	F	IGHG2	F	CTSWKDYFGLEKDSW	in-frame	408	0	0	0	0	0	0	408	0	0	0
IGHV3-9	F	x	x	IGHJ4	F	IGHG2	F	CAKDWRPFGASADGYFDYW	in-frame	407	0	0	0	0	0	0	0	0	407	0
IGHV3-69-1,IGHV3-48	P	x	x	IGHJ6	F	IGHG2	F	CARSSDSLRYMDVW	in-frame	407	0	0	0	0	0	0	0	0	407	0
IGHV3-69-1,IGHV3-48	P	x	x	IGHJ6	F	IGHG2	F	CARSGDYVRYMDVW	in-frame	407	0	0	0	0	0	0	0	0	407	0
IGHV3-43	F	x	x	IGHJ4	F	IGHG2	F	CAKDIYCTVRRCDGRGSDYW	in-frame	407	407	0	0	0	0	0	0	0	0	0
IGHV4-34	F	x	x	IGHJ6	F	IGHG4	F	CARFPPYSRDYSQAYGMDVW	in-frame	406	0	0	0	0	0	0	0	0	406	0
IGHV3-48	F	x	x	IGHJ4	F	IGHG1	F	CASHGGPNDYW	in-frame	405	0	0	0	0	0	405	0	0	0	0
IGHV2-70,IGHV2-5	F	IGHD3-9	F	IGHJ4	F	IGHG1	F	CHYGGYFDWSIDHW	in-frame	405	0	0	405	0	0	0	0	0	0	0
IGHV1-18	F	x	x	IGHJ5,IGHJ4	F	IGHG2	F	CARGPKPDQPLKDGFDTW	in-frame	405	0	0	0	0	0	0	0	0	0	405
IGHV7-4-1	F	IGHD6-19	F	IGHJ6	F	IGHG1	F	CARDNFPIAVAGEGMDVW	in-frame	403	0	0	403	0	0	0	0	0	0	0
IGHV3-33	F	IGHD2-2	F	IGHJ4	F	IGHG2	F	CARGREAPRAVPAARLVPLDYW	in-frame	402	0	402	0	0	0	0	0	0	0	0
IGHV3-23D	F	x	x	IGHJ4	F	IGHG2	F	CAKDLGQWEPPDYW	in-frame	401	0	0	0	0	0	0	0	0	401	0
IGHV3-23D	F	IGHD3-22	F	IGHJ4	F	IGHG2	F	CAKERIKMIVVVISGIYDYW	in-frame	400	0	0	0	0	0	400	0	0	0	0
IGHV1-69	F	x	x	IGHJ6	F	IGHG1	F	CAKEGSSWAYYNGMDVW	in-frame	399	0	0	399	0	0	0	0	0	0	0
IGHV1-18	F	x	x	IGHJ6	F	IGHG4	F	CARDLSRFYVVLPADTSFFRSYYYGKDVW	in-frame	399	0	0	0	0	0	399	0	0	0	0
IGHV3-69-1	P	IGHD2-2	F	IGHJ3	F	IGHG2	F	CARDASPQYCSGTSCYIHALDIW	in-frame	398	0	0	0	0	0	0	0	0	398	0
IGHV3-23D	F	x	x	IGHJ5	F	IGHG2	F	CAKIDSDYQHRRRSGRGGWFDSW	in-frame	398	398	0	0	0	0	0	0	0	0	0
IGHV3-23D	F	IGHD3-10	F	IGHJ4	F	IGHG2	F	CAKGYKYVNMVRGVPIDYW	in-frame	398	0	0	0	398	0	0	0	0	0	0
IGHV3-11	F	x	x	IGHJ1	F	IGHG2	F	CARQMSRAKVPHPVNFW	in-frame	397	0	0	397	0	0	0	0	0	0	0
IGHV1-8	F	x	x	IGHJ5	F	IGHG2	F	CALLRGRGGSARWFDPW	in-frame	397	397	0	0	0	0	0	0	0	0	0
IGHV3-33	F	IGHD6-19	F	IGHJ4	F	IGHG1	F	CARVSTSGWYSDYW	in-frame	395	0	395	0	0	0	0	0	0	0	0
IGHV6-1	F	x	x	IGHJ4	F	IGHG2	F	CARATFGKSKMDYW	in-frame	394	0	394	0	0	0	0	0	0	0	0
IGHV3-7	F	IGHD5-5,IGHD5-18	F	IGHJ3	F	IGHG2	F	CVRELGYSNGHGAFEFW	in-frame	394	0	394	0	0	0	0	0	0	0	0
IGHV3-53	F	x	x	IGHJ4	F	IGHG2	F	CARDDCTTTSCYGHW	in-frame	394	0	0	0	0	394	0	0	0	0	0
IGHV1-8	F	x	x	IGHJ5	F	IGHG2	F	CATLRGRGGSARWFDPW	in-frame	394	394	0	0	0	0	0	0	0	0	0
IGHV1-18	F	x	x	IGHJ4	F	IGHG4	F	CARVGHGFDYW	in-frame	394	0	0	0	0	0	394	0	0	0	0
IGHV1-18	F	x	x	IGHJ4	F	IGHG1	F	CAWRGVSAAAGPFDYW	in-frame	394	0	0	0	0	0	0	0	0	394	0
IGHV3-53	F	IGHD3-10	F	IGHJ3	F	IGHG1	F	CACAMVRGYLHAFDIW	in-frame	392	0	0	0	0	0	392	0	0	0	0
IGHV3-23D	F	x	x	IGHJ3	F	IGHG2	F	CAKDGGLREVDDSFDIW	in-frame	391	0	391	0	0	0	0	0	0	0	0
IGHV1-18	F	IGHD2-15	F	IGHJ4	F	IGHG2	F	CARGPFCSGATCHSQYFDSW	in-frame	391	0	0	0	0	0	391	0	0	0	0
IGHV1-69D	F	IGHD3-3	F	IGHJ6	F	IGHG1	F	CARGLISGVADYYYYYVDVW	in-frame	389	0	0	0	0	0	0	0	0	389	0
IGHV3-9	F	x	x	IGHJ6	F	IGHG1	F	CVKGGASYYYYNGVDVW	in-frame	388	0	0	0	0	0	388	0	0	0	0
IGHV3-23D	F	IGHD3-9	F	IGHJ3	F	IGHG1	F	CAKGGYDILTGPSPFETW	in-frame	387	0	0	0	0	0	0	387	0	0	0
IGHV2-5	F	IGHD5-12	F	IGHJ5	F	IGHG2	F	CVHTSGYDFDQW	in-frame	387	0	0	0	387	0	0	0	0	0	0
IGHV1-3	F	x	x	IGHJ4	F	IGHG2	F	CMRDVYGSADHW	in-frame	387	387	0	0	0	0	0	0	0	0	0
IGHV3-7,IGHV3-69-1,IGHV3-48,IGHV3-11	F	x	x	IGHJ4	F	IGHG2	F	CLAGYSSSGAFW	in-frame	386	386	0	0	0	0	0	0	0	0	0
IGHV3-9	F	x	x	IGHJ3	F	IGHG1	F	CVRVRGIMDDAFDLW	in-frame	385	0	0	0	0	0	0	385	0	0	0
IGHV3-23D,IGHV3-23	F	x	x	IGHJ3	F	IGHG1	F	CAKDGGLRGVDDSFDIW	in-frame	385	0	385	0	0	0	0	0	0	0	0
IGHV3-9	F	x	x	IGHJ4	F	IGHG1	F	CAKGDTGYSSTWLQYW	in-frame	382	0	0	0	0	0	0	0	0	382	0
IGHV3-NL1,IGHV3-30-5,IGHV3-30-3,IGHV3-30	F	IGHD1-1	F	IGHJ6	F	IGHG2	F	CAKLGLQLERGGAVGSYYYYYMDVW	in-frame	381	0	0	0	0	0	0	381	0	0	0
IGHV1-18	F	x	x	IGHJ4	F	IGHG2	F	CARDLRGSWGFDYW	in-frame	381	0	0	0	0	0	0	0	0	381	0
IGHV3-66	F	x	x	IGHJ4	F	IGHG2	F	CARDVKMYGAGSPDHW	in-frame	378	0	0	0	378	0	0	0	0	0	0
IGHV1-3	F	x	x	IGHJ5	F	IGHG2	F	CARASVVVMGQAWFDPW	in-frame	378	0	0	0	0	0	0	0	0	378	0
IGHV3-15	F	x	x	IGHJ6	F	IGHG1	F	CTTDVDWPPPMDVW	in-frame	377	377	0	0	0	0	0	0	0	0	0
IGHV3-20	ORF	x	x	IGHJ5,IGHJ4	F	IGHG2	F	CVRRGDVW	in-frame	376	0	0	0	0	376	0	0	0	0	0
IGHV3-23D	F	x	x	IGHJ3	F	IGHG2	F	CMAGYPGALDMW	in-frame	375	0	0	0	0	0	0	0	0	375	0
IGHV2-70D	F	x	x	IGHJ4	F	IGHG2	F	CARVVRLGGPDYW	in-frame	375	0	0	0	0	0	0	0	0	375	0
IGHV3-72	F	x	x	IGHJ4	F	IGHG2	F	CARSLPTVTGHFDYW	in-frame	374	0	0	0	0	0	0	374	0	0	0
IGHV3-9	F	x	x	IGHJ5,IGHJ4	F	IGHG2	F	CVKDVFAGIGPGGSW	in-frame	373	373	0	0	0	0	0	0	0	0	0
IGHV3-73	F	x	x	IGHJ4	F	IGHG2	F	CSRQTNSCHDYW	in-frame	373	0	0	0	0	0	373	0	0	0	0
IGHV2-5	F	IGHD3-10	F	IGHJ4	F	IGHG1	F	CAVTMIRGRYPFDYW	in-frame	373	0	0	0	0	0	373	0	0	0	0
IGHV3-15	F	IGHD3-9	F	IGHJ4	F	IGHG1	F	CTTLYYDILTGQYW	in-frame	372	0	0	0	0	0	372	0	0	0	0
IGHV1-18	F	IGHD6-19	F	IGHJ4	F	IGHG2	F	CARDRTSVAGTGHFDYW	in-frame	371	0	0	0	0	0	0	0	371	0	0
IGHV1-18	F	IGHD6-19	F	IGHJ5	F	IGHG1	F	CARDGAVAGRGGWFDPW	in-frame	370	0	370	0	0	0	0	0	0	0	0
IGHV1-18	F	IGHD3-10	F	IGHJ3	F	IGHG1	F	CADTNYHSGSYSPHVFDTW	in-frame	370	0	0	0	0	0	0	370	0	0	0
IGHV3-9	F	IGHD2-15	F	IGHJ6	F	IGHG2	F	CARDMSSYCGGGRCDSPHYFYGMDVW	in-frame	369	0	0	0	0	0	0	0	0	369	0
IGHV3-74	F	x	x	IGHJ4	F	IGHG1	F	CASLGSKSYW	in-frame	368	368	0	0	0	0	0	0	0	0	0
IGHV3-23	F	x	x	IGHJ4	F	IGHG2	F	CVTSRQWAIDYW	in-frame	368	0	0	0	0	0	0	0	368	0	0
IGHV3-15	F	IGHD6-19	F	IGHJ5	F	IGHG2	F	CNIGVGQWLVRDSW	in-frame	368	0	368	0	0	0	0	0	0	0	0
IGHV2-5	F	x	x	IGHJ4	F	IGHG1	F	CAHSSTLGQFDVDFDHW	in-frame	368	0	0	0	0	0	368	0	0	0	0
IGHV7-4-1	F	x	x	IGHJ4	F	IGHG2	F	CARGKPVDYW	in-frame	367	0	0	0	0	367	0	0	0	0	0
IGHV3-49	F	x	x	IGHJ5	F	IGHG2	F	CTSFRRTW	in-frame	367	0	0	0	0	0	0	367	0	0	0
IGHV3-9	F	IGHD6-19	F	IGHJ4	F	IGHG1	F	CTKDTQYLAVAGNFDYW	in-frame	366	0	0	366	0	0	0	0	0	0	0
IGHV3-74	F	x	x	IGHJ5,IGHJ4	F	IGHG2	F	CVGSPAQAGTQ**W	out-of-frame	366	0	0	0	0	0	0	366	0	0	0
IGHV3-74	F	x	x	IGHJ5,IGHJ4	F	IGHG2	F	CTRDFDWPTSIW	in-frame	366	0	0	0	0	0	0	0	0	366	0
IGHV3-74	F	x	x	IGHJ4	F	IGHG2	F	CTRDSNAYPGWGDYW	in-frame	365	365	0	0	0	0	0	0	0	0	0
IGHV3-74	F	IGHD5-5,IGHD5-18	F	IGHJ4	F	IGHG1	F	CATDTSEHGYSYGYYDYW	in-frame	364	0	0	364	0	0	0	0	0	0	0
IGHV3-23D	F	IGHD2-2	F	IGHJ4	F	IGHG1	F	CAKGDYCSSTSCYVGEGSFDYW	in-frame	362	0	362	0	0	0	0	0	0	0	0
IGHV3-9	F	x	x	IGHJ4	F	IGHG2	F	CAKGVGKQETVQGWGYHSDYW	in-frame	361	0	0	0	361	0	0	0	0	0	0
IGHV3-23D	F	x	x	IGHJ6	F	IGHG2	F	CAKPIGLPHYYYYGMDVW	in-frame	361	0	0	0	0	0	361	0	0	0	0
IGHV3-23D	F	x	x	IGHJ5	F	IGHG2	F	CAICAIDVREGSSGWCNWLDPW	in-frame	360	0	0	0	0	0	0	0	0	360	0
IGHV1-8	F	IGHD3-10	F	IGHJ5	F	IGHG1	F	CARGVVRGLISWFDPW	in-frame	360	360	0	0	0	0	0	0	0	0	0
IGHV2-5	F	IGHD3-9	F	IGHJ4	F	IGHG2	F	CHYGGYFDWSIDYW	in-frame	359	0	0	359	0	0	0	0	0	0	0
IGHV2-70	F	x	x	IGHJ4	F	IGHG2	F	CAHRRDYNGNWDGGSLDYW	in-frame	358	0	0	0	0	0	0	0	0	358	0
IGHV4-34	F	IGHD2-2	F	IGHJ6	F	IGHG1	F	CARGQRCSSARCNRPFYFYGMDVW	in-frame	357	0	0	0	0	0	0	0	357	0	0
IGHV3-23D	F	x	x	IGHJ4	F	IGHG2	F	CAKDDLSGSYSDFW	in-frame	356	0	0	0	0	0	0	0	0	356	0
IGHV1-18	F	x	x	IGHJ6	F	IGHG2	F	CARDKWEGSYSYYAMDVW	in-frame	356	0	0	0	0	0	0	0	0	356	0
IGHV4-34	F	x	x	IGHJ6	F	IGHG1	F	CARLDSWNDGEDYYYHGMDVW	in-frame	355	0	0	0	355	0	0	0	0	0	0
IGHV3-7	F	x	x	IGHJ4	F	IGHG1	F	CARDVGYLDYW	in-frame	355	0	0	0	0	0	0	355	0	0	0
IGHV4-34,IGHV4-31	F	x	x	IGHJ3	F	IGHG1	F	CARVLSLVVTIW	in-frame	354	0	0	0	0	0	0	354	0	0	0
IGHV3-74	F	x	x	IGHJ4	F	IGHG1	F	CVRDGDHWNFDSW	in-frame	354	0	354	0	0	0	0	0	0	0	0
IGHV4-39	F	x	x	IGHJ5	F	IGHG4	F	CARRVIVSIGYHWFDPW	in-frame	353	0	0	0	0	0	0	0	0	0	353
IGHV4-34,IGHV4-31	F	x	x	IGHJ5	F	IGHG1	F	CARDGTSNYNYIDPW	in-frame	353	0	0	0	0	0	353	0	0	0	0
IGHV4-59	F	x	x	IGHJ4	F	IGHG1	F	CARGFQWLEPRPYFDYW	in-frame	352	0	352	0	0	0	0	0	0	0	0
IGHV3-7,IGHV3-69-1,IGHV3-48	F	x	x	IGHJ4	F	IGHG2	F	CARVSLGYRSSWYYIDSW	in-frame	352	0	0	0	0	0	0	0	352	0	0
IGHV3-7	F	x	x	IGHJ5	F	IGHG2	F	CARGGRTHFDPW	in-frame	352	0	352	0	0	0	0	0	0	0	0
IGHV3-23D	F	IGHD3-10	F	IGHJ6	F	IGHG2	F	CANEGSFSGSYYYYYYGMDVW	in-frame	352	0	0	0	0	0	0	0	0	352	0
IGHV2-5	F	IGHD5-12	F	IGHJ4	F	IGHG2	F	CAHMSGYDFDYW	in-frame	352	0	0	0	352	0	0	0	0	0	0
IGHV3-74	F	x	x	IGHJ4	F	IGHG2	F	CARDLDWELFDVW	in-frame	351	0	0	0	0	0	351	0	0	0	0
IGHV3-9	F	IGHD6-19	F	IGHJ5	F	IGHG2	F	CAKVSRYSSGWVDYW	in-frame	349	0	0	0	0	349	0	0	0	0	0
IGHV3-74	F	IGHD3-10	F	IGHJ5,IGHJ4	F	IGHG2	F	CVGSPAQADTQ**W	out-of-frame	349	0	0	0	0	0	0	349	0	0	0
IGHV3-9	F	x	x	IGHJ6	F	IGHG1	F	CAKDHSSGERSYYGLEVW	in-frame	348	0	0	348	0	0	0	0	0	0	0
IGHV3-7	F	x	x	IGHJ4	F	IGHG2	F	CARGYKGLDYW	in-frame	348	0	348	0	0	0	0	0	0	0	0
IGHV2-5	F	IGHD4-17	F	IGHJ3	F	IGHG1	F	CTLTEHDYGDYVNASAIW	in-frame	347	0	0	0	0	0	0	347	0	0	0
IGHV1-18	F	IGHD3-10	F	IGHJ4	F	IGHG1	F	CASGLLSDRYGSGSLGRHW	in-frame	344	0	0	0	0	0	0	0	0	344	0
IGHV3-69-1	P	IGHD3-9	F	IGHJ4	F	IGHG2	F	CARIDDILTGYLGAFFDFW	in-frame	343	0	0	0	0	0	0	0	0	343	0
IGHV3-23	F	x	x	IGHJ4	F	IGHG2	F	CAKSRERERNYFDYW	in-frame	341	0	0	0	0	0	0	0	341	0	0
IGHV3-11	F	x	x	IGHJ5	F	IGHG2	F	CARTYYDSVNRMSNWFDIW	in-frame	341	0	0	0	0	0	0	0	0	341	0
IGHV3-23D	F	x	x	IGHJ6	F	IGHG2	F	CAKEEGQIFYGTETWLSNYGLDYW	in-frame	340	0	0	0	0	0	0	340	0	0	0
IGHV3-23D	F	x	x	IGHJ2	F	IGHG2	F	CAKDRRVSPLWYLEVW	in-frame	340	0	0	0	0	0	0	0	340	0	0
IGHV4-34,IGHV4-31	F	x	x	IGHJ6	F	IGHG1	F	CARSYDGMEVW	in-frame	339	0	0	0	0	0	0	0	0	339	0
IGHV3-49	F	x	x	IGHJ1	F	IGHG1	F	CTSYSTTNWYVFQHW	in-frame	339	339	0	0	0	0	0	0	0	0	0
IGHV4-61	F	x	x	IGHJ4	F	IGHG1	F	CARHRLPHPSHFDSW	in-frame	338	0	0	0	0	0	0	0	0	338	0
IGHV3-15	F	IGHD3-10	F	IGHJ3	F	IGHG2	F	CIRWSYSAFDIW	in-frame	338	0	338	0	0	0	0	0	0	0	0
IGHV4-61	F	x	x	IGHJ6	F	IGHG2	F	CARDASYGLDVW	in-frame	337	0	0	0	0	0	0	0	0	337	0
IGHV3-71	P	x	x	IGHJ4	F	IGHG2	F	CARDVYPGNSNWGYHYFDYW	in-frame	337	0	0	0	0	0	0	0	0	337	0
IGHV3-7,IGHV3-21,IGHV3-11	F	IGHD3-10	F	IGHJ6	F	IGHG2	F	CAREQVLLWFGELAHYYYYYGMDVW	in-frame	336	0	0	0	0	0	0	0	0	336	0
IGHV3-15	F	x	x	IGHJ4	F	IGHG2	F	CTSRVVTTNDHW	in-frame	335	0	335	0	0	0	0	0	0	0	0
IGHV1-2	F	x	x	IGHJ5	F	IGHG1	F	CARDRVRGGWEFVDW	in-frame	335	0	0	0	0	0	0	0	335	0	0
IGHV7-4-1	F	x	x	IGHJ4	F	IGHG2	F	CARGLTGYDNNGLDLDSW	in-frame	333	0	0	0	0	0	0	0	333	0	0
IGHV3-13	F	x	x	IGHJ4	F	IGHG2	F	CATGLSGWDYW	in-frame	333	333	0	0	0	0	0	0	0	0	0
IGHV3-9	F	IGHD3-10	F	IGHJ6	F	IGHG2	F	CSKVIYYGPDSYLYYGMDVW	in-frame	332	0	0	0	0	0	0	0	0	332	0
IGHV3-23D	F	x	x	IGHJ5,IGHJ1	F	IGHG1	F	CAKDSGDGYLIGCDHW	in-frame	332	0	0	0	0	0	0	0	332	0	0
IGHV3-15	F	x	x	IGHJ4	F	IGHG1	F	CTTGPELLDAFDYW	in-frame	332	0	0	332	0	0	0	0	0	0	0
IGHV1-69	F	x	x	IGHJ4	F	IGHG2	F	CARSIPDSVCRGYCGYYDRW	in-frame	331	0	0	0	0	0	0	0	0	0	331
IGHV3-9	F	IGHD3-16	F	IGHJ4	F	IGHG1	F	CARAANDYVGGYYRHFDKW	in-frame	330	0	0	0	0	0	0	0	330	0	0
IGHV3-9	F	IGHD3-10	F	IGHJ4	F	IGHG2	F	CAKGSLTMVRGALGTIDYW	in-frame	330	0	0	0	0	0	0	330	0	0	0
IGHV3-71	P	x	x	IGHJ6	F	IGHG1	F	CAGERVVILPGYYYYSGMDVW	in-frame	330	0	330	0	0	0	0	0	0	0	0
IGHV3-66	F	x	x	IGHJ4	F	IGHG2	F	CARLQRGINYLDKTGPAYFDYW	in-frame	330	0	330	0	0	0	0	0	0	0	0
IGHV3-15	F	x	x	IGHJ5,IGHJ4,IGHJ1	F	IGHG2	F	CTTFREW	in-frame	330	0	0	0	0	0	0	330	0	0	0
IGHV2-5	F	x	x	IGHJ3	F	IGHG1	F	CAHSSFLSDWHWAFDLW	in-frame	330	0	0	0	0	0	0	330	0	0	0
IGHV2-70	ORF	IGHD3-9	F	IGHJ3	F	IGHG1	F	CARTVRGGYFDYLPIHAFDVW	in-frame	329	0	0	0	0	0	329	0	0	0	0
IGHV2-5	F	x	x	IGHJ5,IGHJ4	F	IGHG1	F	CAHTSTSFLRGAEW	in-frame	329	0	0	0	0	0	0	329	0	0	0
IGHV1-69D	F	x	x	IGHJ4	F	IGHG1	F	CARTSKYHYQSPFDYW	in-frame	329	0	0	0	0	0	0	0	0	329	0
IGHV3-23D	F	x	x	IGHJ5	F	IGHG2	F	CAKDMQQWLTRAGWFDPW	in-frame	327	0	0	0	0	0	0	0	0	327	0
IGHV3-69-1,IGHV3-48,IGHV3-11	P	x	x	IGHJ4	F	IGHG1	F	CARDQGDFFDFW	in-frame	326	0	0	0	0	0	0	326	0	0	0
IGHV3-33	F	x	x	IGHJ6	F	IGHG2	F	CARELVYCGGGYCDSDGMDVW	in-frame	325	0	0	0	325	0	0	0	0	0	0
IGHV3-33	F	x	x	IGHJ4	F	IGHG2	F	CGRVRGDCLAGGCHGDYW	in-frame	325	0	0	0	0	0	325	0	0	0	0
IGHV3-33	F	x	x	IGHJ2	F	IGHG2	F	CAKARADWSLDLW	in-frame	325	0	0	325	0	0	0	0	0	0	0
IGHV2-5	F	IGHD3-10	F	IGHJ4	F	IGHG1	F	CAHSRVRGVSAYW	in-frame	325	0	0	0	0	0	0	0	0	325	0
IGHV4-61,IGHV4-59	F	IGHD6-19	F	IGHJ6	F	IGHG2	F	CARDRYSSGWYGGDYYYGMDVW	in-frame	324	0	0	0	0	0	0	324	0	0	0
IGHV4-34	F	IGHD3-10	F	IGHJ5,IGHJ4	F	IGHG1	F	CARGPRWFGELW	in-frame	323	0	323	0	0	0	0	0	0	0	0
IGHV3-NL1	F	IGHD1-1	F	IGHJ6	F	IGHG2	F	CAKLGLQLERGGAVGSYYYYYMDVW	in-frame	323	0	0	0	0	0	0	323	0	0	0
IGHV3-33	F	x	x	IGHJ6	F	IGHG2	F	CGKTGYYWLREYYYYGISVW	in-frame	323	0	0	323	0	0	0	0	0	0	0
IGHV4-34	F	IGHD3-10	F	IGHJ6	F	IGHG1	F	CARGSLVRGVKIITVYEYSTYMDVW	in-frame	322	0	0	0	0	0	0	0	322	0	0
IGHV3-30	F	x	x	IGHJ4	F	IGHG2	F	CVRDDRHYIGWHFDYW	in-frame	322	0	322	0	0	0	0	0	0	0	0
IGHV3-15	F	x	x	IGHJ4	F	IGHG1	F	CTTDYYDGRPPFDSW	in-frame	322	0	0	322	0	0	0	0	0	0	0
IGHV3-74	F	x	x	IGHJ5	F	IGHG2	F	CAWGPAS*W	out-of-frame	321	0	0	0	0	0	0	0	321	0	0
IGHV2-70D,IGHV2-70	F	x	x	IGHJ4	F	IGHG1	F	CARTLRGFNYGHHYYFDYW	in-frame	321	0	0	0	0	0	321	0	0	0	0
IGHV4-61,IGHV4-59	F	x	x	IGHJ4	F	IGHG1	F	CARDRSIFSKYFYDDW	in-frame	320	0	0	0	0	0	0	320	0	0	0
IGHV3-9	F	x	x	IGHJ4	F	IGHG1	F	CARDIMGAMSMFYFDYW	in-frame	320	0	0	320	0	0	0	0	0	0	0
IGHV3-9	F	x	x	IGHJ4	F	IGHG1	F	CAKGSGDQLLLDFDYW	in-frame	320	0	0	320	0	0	0	0	0	0	0
IGHV3-23D	F	x	x	IGHJ4	F	IGHG4	F	CAKLRQQGVTRILVSPFDHW	in-frame	320	0	0	0	0	0	0	320	0	0	0
IGHV2-26	F	x	x	IGHJ4	F	IGHG1	F	CARKTYSFGHFDFW	in-frame	320	0	0	320	0	0	0	0	0	0	0
IGHV1-24	F	x	x	IGHJ3	F	IGHG1	F	CSIGHEALGGFDIW	in-frame	319	0	0	0	0	0	319	0	0	0	0
IGHV4-59	F	x	x	IGHJ4	F	IGHG2	F	CARQRGTYDYYFDYW	in-frame	318	0	0	318	0	0	0	0	0	0	0
IGHV3-7	F	x	x	IGHJ4	F	IGHG2	F	CAAGGGYLIDYW	in-frame	318	0	0	0	0	0	0	318	0	0	0
IGHV3-15	F	x	x	IGHJ6	F	IGHG2	F	CSWDDHTGMDVW	in-frame	318	0	0	0	0	0	0	318	0	0	0
IGHV1-3	F	x	x	IGHJ4	F	IGHG2	F	CARSLYRPSGVGLYHFDYW	in-frame	318	0	0	0	0	0	0	0	0	0	318
IGHV3-49	F	x	x	IGHJ5,IGHJ4	F	IGHG1	F	CARARQWLQFW	in-frame	317	0	0	317	0	0	0	0	0	0	0
IGHV3-15	F	x	x	IGHJ3	F	IGHG2	F	CVRWHYSAFDIW	in-frame	317	0	317	0	0	0	0	0	0	0	0
IGHV3-7,IGHV3-69-1,IGHV3-48,IGHV3-21	F	IGHD2-2	F	IGHJ6	F	IGHG1	F	CARDQGALVVVPAAMYHYYGMDVW	in-frame	316	0	316	0	0	0	0	0	0	0	0
IGHV3-15	F	x	x	IGHJ1	F	IGHG2	F	CAEYGPAEYFQSW	in-frame	315	0	0	0	0	0	315	0	0	0	0
IGHV5-51	F	x	x	IGHJ4	F	IGHG2	F	CARGLNDRLDYW	in-frame	314	0	0	0	0	0	0	314	0	0	0
IGHV4-39	F	IGHD3-10	F	IGHJ4	F	IGHG1	F	CARVVIWFGEGDDYW	in-frame	314	0	0	0	0	0	0	0	0	314	0
IGHV3-74	F	x	x	IGHJ3	F	IGHG2	F	CGRVYSAPFW	in-frame	314	0	0	0	0	0	0	0	0	314	0
IGHV3-72	F	IGHD3-10	F	IGHJ5	F	IGHG4	F	CARDSLVRGVIYGANWFDPW	in-frame	314	0	0	0	0	0	0	0	0	314	0
IGHV3-23D	F	x	x	IGHJ4	F	IGHG1	F	CAKDSYPLGTVTKGHFDNW	in-frame	314	0	0	0	0	0	0	314	0	0	0
IGHV3-15	F	x	x	IGHJ3	F	IGHG1	F	CATYNDRDAFNFW	in-frame	314	0	0	0	0	0	0	314	0	0	0
IGHV3-13	F	x	x	IGHJ5	F	IGHG2	F	CATGRYGWDSW	in-frame	314	314	0	0	0	0	0	0	0	0	0
IGHV3-23D	F	x	x	IGHJ5	F	IGHG2	F	CAKDPNVVVTARGFDSW	in-frame	313	313	0	0	0	0	0	0	0	0	0
IGHV3-15	F	x	x	IGHJ5	F	IGHG2	F	CTTDLAVTGSYFRPW	in-frame	313	0	313	0	0	0	0	0	0	0	0
IGHV4-61	F	IGHD2-2	F	IGHJ6	F	IGHG1	F	CARTSSVPAAIGHYMDVW	in-frame	312	0	0	0	0	0	0	312	0	0	0
IGHV4-39	F	x	x	IGHJ4	F	IGHG1	F	CARGPPNLGAVYFDYW	in-frame	312	0	0	0	0	0	312	0	0	0	0
IGHV3-53	F	x	x	IGHJ6	F	IGHG2	F	CASPVATAYYYYGMDVW	in-frame	312	312	0	0	0	0	0	0	0	0	0
IGHV3-15	F	IGHD3-10	F	IGHJ4	F	IGHG2	F	CATALHYYGSGTSLVGYW	in-frame	312	0	312	0	0	0	0	0	0	0	0
IGHV2-5	F	IGHD4/OR15-4b	ORF	IGHJ3	F	IGHG2	F	CAHRPMTYGARYSFDVW	in-frame	312	0	0	0	0	0	0	0	0	312	0
IGHV2-26	F	x	x	IGHJ6	F	IGHG1	F	CARIGLLWSGEFLRGARGLDVW	in-frame	312	0	0	0	312	0	0	0	0	0	0
IGHV3-9	F	IGHD5-5,IGHD5-18	F	IGHJ4	F	IGHG2	F	CVKDRRGYSSGYDW	in-frame	311	0	0	311	0	0	0	0	0	0	0
IGHV3-7	F	x	x	IGHJ4	F	IGHG2	F	CARGRQGGDW	in-frame	311	0	0	0	0	0	311	0	0	0	0
IGHV3-49	F	x	x	IGHJ5	F	IGHG2	F	CNTAVGQWGVRDSW	in-frame	311	0	311	0	0	0	0	0	0	0	0
IGHV3-43	F	x	x	IGHJ4	F	IGHG2	F	CAKDADCPTCYFDLW	in-frame	311	0	0	0	0	0	0	0	311	0	0
IGHV3-33	F	x	x	IGHJ1	F	IGHG2	F	CKKAALSSSAGAW	in-frame	311	0	311	0	0	0	0	0	0	0	0
IGHV3-23D	F	x	x	IGHJ4	F	IGHG2	F	CARKLTLTGYPGWGRPIDYW	in-frame	311	0	0	0	0	0	311	0	0	0	0
IGHV3-NL1	F	x	x	IGHJ6	F	IGHG1	F	CAKDGWYADPTQGHHYYYMDVW	in-frame	310	0	0	0	0	0	0	310	0	0	0
IGHV4/OR15-8	ORF	x	x	IGHJ6	F	IGHG1	F	CARVKAINFYYYMDVW	in-frame	309	0	0	0	0	0	1	308	0	0	0
IGHV3-48	F	x	x	IGHJ5,IGHJ4	F	IGHG2	F	CATDLTKW	in-frame	309	0	0	0	0	0	0	309	0	0	0
IGHV3-11	F	x	x	IGHJ6	F	IGHG2	F	CVRGNYGMDFW	in-frame	309	0	0	0	0	0	0	309	0	0	0
IGHV1-69	F	x	x	IGHJ4	F	IGHG2	F	CARSIPDSVCRGYCRYYDRW	in-frame	308	0	0	0	0	0	0	0	0	0	308
IGHV1-18	F	x	x	IGHJ3	F	IGHG1	F	CVRVPGYGVDDAFDIW	in-frame	308	0	0	0	0	0	0	0	0	308	0
IGHV3-72	F	IGHD3-10	F	IGHJ6	F	IGHG2	F	CSRAGSGTHRGYQYAMDVW	in-frame	307	0	0	0	0	0	0	307	0	0	0
IGHV2-70,IGHV2-5	F	x	x	IGHJ3	F	IGHG1	F	CAHSSFLSDWHWAFDLW	in-frame	307	0	0	0	0	0	0	307	0	0	0
IGHV2-5	F	x	x	IGHJ4	F	IGHG2	F	CAHRTSSGIPGVTIFDYW	in-frame	307	0	0	0	0	0	0	0	307	0	0
IGHV2-5	F	x	x	IGHJ3	F	IGHG2	F	CVKSSEGVSRQDPFDLW	in-frame	307	0	0	0	307	0	0	0	0	0	0
IGHV3-7	F	x	x	IGHJ4	F	IGHG2	F	CVRNRAAADYW	in-frame	306	0	0	0	0	0	0	0	306	0	0
IGHV3-15	F	IGHD4-17	F	IGHJ3	F	IGHG1	F	CATGEVVGGDDYGDYEHDPFEIW	in-frame	306	0	0	0	0	0	0	0	0	306	0
IGHV6-1	F	IGHD3-10	F	IGHJ3	F	IGHG2	F	CARLQGYGSGGQYPLDIW	in-frame	305	0	305	0	0	0	0	0	0	0	0
IGHV3-23D	F	x	x	IGHJ4	F	IGHG2	F	CATETRPNDYW	in-frame	305	0	305	0	0	0	0	0	0	0	0
IGHV3-15	F	IGHD5-24	ORF	IGHJ4	F	IGHG1	F	CSTDRDGYNYFDYW	in-frame	305	0	0	0	0	0	305	0	0	0	0
IGHV3-48	F	x	x	IGHJ6	F	IGHG1	F	CARGDFSNPYYYYGVDVW	in-frame	304	0	0	0	0	0	0	0	304	0	0
IGHV4-34,IGHV4-31	F	x	x	IGHJ5	F	IGHG2	F	CASWRDYYGLEKDSW	in-frame	303	0	0	0	0	0	0	303	0	0	0
IGHV3-74	F	x	x	IGHJ5	F	IGHG2	F	CAKDVGFGNDRW	in-frame	303	0	0	0	0	303	0	0	0	0	0
IGHV3-NL1,IGHV3-30-5,IGHV3-30-3,IGHV3-30	F	IGHD6-19	F	IGHJ3	F	IGHG2	F	CAKVIHRGEIPVAGRVFDIW	in-frame	302	0	0	0	0	302	0	0	0	0	0
IGHV3-23D	F	IGHD2-2	F	IGHJ6	F	IGHG1	F	CAKDRLPHYCSSTSCYGVMDVW	in-frame	301	0	0	0	0	0	0	301	0	0	0
IGHV3-20	ORF	x	x	IGHJ4	F	IGHG2	F	CARCHEQNSKALSCYFDRW	in-frame	301	0	0	0	0	0	0	0	0	301	0
IGHV2-5	F	x	x	IGHJ4	F	IGHG1	F	CVYRRSGGYVPRPGFDYW	in-frame	301	0	0	0	301	0	0	0	0	0	0
IGHV4-34,IGHV4-31	F	x	x	IGHJ4	F	IGHG2	F	CATDVAGPLEDW	in-frame	300	0	0	0	0	0	0	0	0	0	300
IGHV1-3	F	x	x	IGHJ6	F	IGHG2	F	CARDPLTGFYYYAMDVW	in-frame	300	0	300	0	0	0	0	0	0	0	0
IGHV4-61	F	IGHD3-10	F	IGHJ4	F	IGHG2	F	CVCYGAGSFAFDFW	in-frame	299	0	0	0	299	0	0	0	0	0	0
IGHV3-23D	F	x	x	IGHJ4	F	IGHG2	F	CAKSTHALGDLSHFDHW	in-frame	299	0	0	0	0	0	0	0	0	0	299
IGHV1-3	F	IGHD6-13	F	IGHJ4	F	IGHG1	F	CARGEALAAAGVFDYW	in-frame	299	0	0	0	0	0	0	0	0	299	0
IGHV1-18	F	x	x	IGHJ5	F	IGHG1	F	CARAINWFDPW	in-frame	299	0	0	0	0	0	0	0	0	299	0
IGHV3-9	F	x	x	IGHJ4	F	IGHG1	F	CAKDNVAELKNGFFESW	in-frame	298	0	0	298	0	0	0	0	0	0	0
IGHV3-49	F	x	x	IGHJ4	F	IGHG2	F	CTKYCGFDFW	in-frame	298	0	0	0	0	0	0	298	0	0	0
IGHV3-15	F	x	x	IGHJ5,IGHJ4	F	IGHG2	F	CSIEGAW	in-frame	298	0	0	0	0	0	0	0	0	298	0
IGHV3-15	F	x	x	IGHJ5	F	IGHG2	F	CAVGRLSQWEHW	in-frame	298	0	0	0	0	298	0	0	0	0	0
IGHV1-18	F	x	x	IGHJ5,IGHJ4	F	IGHG2	F	CARGPQPDQPLKDGFDTW	in-frame	298	0	0	0	0	0	0	0	0	0	298
IGHV3-53	F	x	x	IGHJ5,IGHJ4	F	IGHG2	F	CARDVGPW	in-frame	297	0	0	0	297	0	0	0	0	0	0
IGHV3-49	F	x	x	IGHJ1	F	IGHG2	F	CTRESYTNRWNLQLW	in-frame	297	0	0	0	0	0	0	0	297	0	0
IGHV5-51	F	IGHD6-13	F	IGHJ4	F	IGHG1	F	CARWGIAAALDLDYW	in-frame	296	0	296	0	0	0	0	0	0	0	0
IGHV4-61	F	x	x	IGHJ2	F	IGHG1	F	CAREQADVTWWFDIW	in-frame	296	0	0	0	0	0	0	0	296	0	0
IGHV3-23D	F	IGHD6-19	F	IGHJ4	F	IGHG2	F	CAKYKGYISGWGGYYFDYW	in-frame	296	0	0	0	0	0	0	296	0	0	0
IGHV4-39	F	IGHD3-10	F	IGHJ4	F	IGHG1	F	CARRASGSGSTFDQW	in-frame	295	0	0	0	0	0	0	0	0	295	0
IGHV4-61	F	x	x	IGHJ4	F	IGHG2	F	CARAPPSLWNFDSW	in-frame	294	0	0	0	0	0	0	0	0	294	0
IGHV4-30-4	F	x	x	IGHJ6	F	IGHG1	F	CARGGIINLRGIIKVSHYYGMDVW	in-frame	294	0	294	0	0	0	0	0	0	0	0
IGHV3-NL1	F	IGHD5-12	F	IGHJ4	F	IGHG1	F	CAKAAREGYSGFDWTKDVFDSW	in-frame	294	0	0	0	0	0	0	294	0	0	0
IGHV3-74	F	x	x	IGHJ4	F	IGHG2	F	CVRVATMGSTRDHPPSYFDDW	in-frame	294	294	0	0	0	0	0	0	0	0	0
IGHV3-11	F	x	x	IGHJ4	F	IGHG1	F	CARDPSGYKYW	in-frame	294	0	0	0	0	0	294	0	0	0	0
IGHV5-51	F	IGHD6-19	F	IGHJ4	F	IGHG2	F	CARRLAVAGTFEYW	in-frame	293	0	293	0	0	0	0	0	0	0	0
IGHV3-9	F	IGHD3-3	F	IGHJ6	F	IGHG1	F	CAKGAEVKIASYDLWSPYYSSAGDYNYMDVW	in-frame	293	0	0	0	0	0	0	0	0	293	0
IGHV3-74	F	x	x	IGHJ4	F	IGHG2	F	CARDLDWELFDIW	in-frame	293	0	0	0	0	0	293	0	0	0	0
IGHV3-33,IGHV3-53	F	x	x	IGHJ4	F	IGHG2	F	CAKSHSADYVDVVDDVRFDSW	in-frame	293	0	0	0	0	0	0	0	0	293	0
IGHV3-9	F	x	x	IGHJ2	F	IGHG1	F	CAKDPGPGTIGYIDLW	in-frame	292	0	0	0	0	0	0	292	0	0	0
IGHV3-9	F	IGHD2-2	F	IGHJ4	F	IGHG2	F	CVKKLEARTTSWYAFDFW	in-frame	292	0	0	0	0	0	0	0	292	0	0
IGHV3/OR16-9	ORF	x	x	IGHJ4	F	IGHG2	F	CVKLYNIGQQMVTLSDFW	in-frame	291	0	0	0	0	0	0	291	0	0	0
IGHV3-9	F	IGHD4-17	F	IGHJ3	F	IGHG1	F	CAKATYGDYTGRAFDIW	in-frame	291	0	0	0	0	0	0	291	0	0	0
IGHV3-69-1,IGHV3-48	P	x	x	IGHJ6	F	IGHG1	F	CARALGEGTDYYYYMDVW	in-frame	291	0	0	0	0	0	0	0	0	291	0
IGHV1-3	F	x	x	IGHJ4	F	IGHG2	F	CAPTVGGSFDHW	in-frame	291	0	0	0	0	0	0	291	0	0	0
IGHV5-51	F	x	x	IGHJ4	F	IGHG2	F	CVRHGETYDSYGRYW	in-frame	290	0	0	0	0	0	0	0	0	290	0
IGHV3-71	P	x	x	IGHJ6	F	IGHG2	F	CARGKDSRIGGLYLYGVDVW	in-frame	290	0	0	0	0	0	0	0	0	290	0
IGHV3-9	F	x	x	IGHJ4	F	IGHG1	F	CVKGEAGILTSYFFENW	in-frame	289	0	0	289	0	0	0	0	0	0	0
IGHV3-7	F	x	x	IGHJ4	F	IGHG2	F	CATSAFGYW	in-frame	289	0	0	0	0	0	0	0	289	0	0
IGHV3-69-1	P	x	x	IGHJ6	F	IGHG1	F	CARDNGAGGMDVW	in-frame	288	0	0	0	0	0	0	0	288	0	0
IGHV3-33	F	IGHD3-10	F	IGHJ6	F	IGHG1	F	CARSKAYYYGSGRLYYYMDVW	in-frame	288	0	0	0	0	0	0	288	0	0	0
IGHV4-34,IGHV4-31	F	x	x	IGHJ5	F	IGHG2	F	CTTWTDYYGLEKDSW	in-frame	287	0	0	0	0	0	0	287	0	0	0
IGHV3-48	F	x	x	IGHJ6	F	IGHG1	F	CAREQTYYYDMDVW	in-frame	287	0	287	0	0	0	0	0	0	0	0
IGHV3-43	F	IGHD3-10	F	IGHJ4	F	IGHG2	F	CASLVWFGDLAIDYW	in-frame	287	0	0	0	287	0	0	0	0	0	0
IGHV3-23D	F	x	x	IGHJ5	F	IGHG2	F	CVKDPHEVITARGFDAW	in-frame	287	287	0	0	0	0	0	0	0	0	0
IGHV5-51	F	x	x	IGHJ4	F	IGHG2	F	CGRRGGSVAASKAPFDNW	in-frame	286	0	0	0	0	0	286	0	0	0	0
IGHV3-23D	F	IGHD6-6	F	IGHJ4	F	IGHG1	F	CAKDGSSSSPRSPFDFW	in-frame	286	0	0	0	0	0	0	0	0	286	0
IGHV3-15	F	x	x	IGHJ3	F	IGHG2	F	CTRWTYSAFDIW	in-frame	286	0	286	0	0	0	0	0	0	0	0
IGHV7-4-1	F	IGHD2-2	F	IGHJ4	F	IGHG2	F	CARDLYCSSTRCYVRARDSDYW	in-frame	285	0	285	0	0	0	0	0	0	0	0
IGHV3-23D	F	x	x	IGHJ4	F	IGHG1	F	CAKEPTVHNPYSFDYW	in-frame	285	0	0	0	0	0	0	0	0	285	0
IGHV5-51	F	x	x	IGHJ5	F	IGHG1	F	CARGPLGVTPDDMMDNWFDTW	in-frame	284	0	0	0	284	0	0	0	0	0	0
IGHV4-34	F	IGHD3-22	F	IGHJ2	F	IGHG2	F	CARVRDFYDNSGSNRGWYFDLW	in-frame	284	0	284	0	0	0	0	0	0	0	0
IGHV3-20	ORF	IGHD3-10	F	IGHJ6	F	IGHG1	F	CARVSVRGFGSGNYGGADSYYGMDVW	in-frame	284	0	0	0	0	0	0	0	0	284	0
IGHV1-2	F	x	x	IGHJ5	F	IGHG1	F	CARAKRGDSLDPW	in-frame	284	0	0	0	0	0	0	0	284	0	0
IGHV3-9	F	IGHD6-19	F	IGHJ2	F	IGHG1	F	CAKDKGSGWPLYWYFDLW	in-frame	283	0	283	0	0	0	0	0	0	0	0
IGHV3-49	F	x	x	IGHJ1	F	IGHG2	F	CTTYYGTSSWLVFHRW	in-frame	283	283	0	0	0	0	0	0	0	0	0
IGHV4-59	F	IGHD3-3	F	IGHJ4	F	IGHG1	F	CARGYDFWNGYSGNSFDNW	in-frame	282	0	0	0	0	0	0	0	0	282	0
IGHV4-39	F	x	x	IGHJ3	F	IGHG2	F	CARHADHGGDISAFDVW	in-frame	282	0	0	0	0	0	0	0	0	282	0
IGHV3-NL1,IGHV3-30-5,IGHV3-30-3,IGHV3-30	F	x	x	IGHJ3	F	IGHG2	F	CVKIRTIGTGDAFDIW	in-frame	282	0	282	0	0	0	0	0	0	0	0
IGHV3-9	F	x	x	IGHJ5	F	IGHG2	F	CAKDHYRSGWPQFDRW	in-frame	281	0	0	0	0	0	0	0	0	281	0
IGHV3-9	F	IGHD3-10	F	IGHJ4	F	IGHG1	F	CAKDFYYGSGSCFDYW	in-frame	281	0	0	0	0	0	0	0	0	281	0
IGHV3-71	P	x	x	IGHJ5	F	IGHG2	F	CTRGHYGPW	in-frame	281	0	281	0	0	0	0	0	0	0	0
IGHV3-7,IGHV3-69-1,IGHV3-48	F	x	x	IGHJ4	F	IGHG1	F	CARDQGDFFDFW	in-frame	281	0	0	0	0	0	0	281	0	0	0
IGHV3-23D	F	IGHD6-13	F	IGHJ2	F	IGHG1	F	CAKSPEYSSSWYWYFDLW	in-frame	281	0	281	0	0	0	0	0	0	0	0
IGHV3-23D	F	IGHD1-26	F	IGHJ4	F	IGHG1	F	CAKGYVEWELLPAFDYW	in-frame	281	0	281	0	0	0	0	0	0	0	0
IGHV3-15	F	IGHD2-15	F	IGHJ4	F	IGHG2	F	CTTERYCSGGSCLPRNYW	in-frame	281	0	0	0	0	0	0	0	281	0	0
IGHV1-69	F	x	x	IGHJ4	F	IGHG2	F	CARSIPDAVCRGYCGYFDRW	in-frame	281	0	0	0	0	0	0	0	0	0	281
IGHV3-53	F	x	x	IGHJ2	F	IGHG1	F	CARGGLYGDRSYWYFDLW	in-frame	280	0	280	0	0	0	0	0	0	0	0
IGHV4-34,IGHV4-31	F	x	x	IGHJ4	F	IGHG1	F	CTREDGFKGGVDDFW	in-frame	279	0	0	0	0	0	0	279	0	0	0
IGHV3-9	F	x	x	IGHJ6	F	IGHG2	F	CAKVRAPGGNLNYYYGMDVW	in-frame	279	279	0	0	0	0	0	0	0	0	0
IGHV3-48	F	IGHD3-10	F	IGHJ6	F	IGHG2	F	CAREYGSGSLYYYYYYGMDVW	in-frame	279	0	0	0	0	0	0	279	0	0	0
IGHV3-33	F	x	x	IGHJ6	F	IGHG1	F	CARDREGEYYYGMDVW	in-frame	279	0	0	0	0	0	279	0	0	0	0
IGHV7-4-1	F	IGHD6-13	F	IGHJ3	F	IGHG1	F	CARDPLEQLLVRDTFDIW	in-frame	278	0	278	0	0	0	0	0	0	0	0
IGHV3-72	F	IGHD6-19	F	IGHJ4	F	IGHG2	F	CARTSYSSGWYVVFDYW	in-frame	278	0	0	0	0	0	0	0	0	278	0
IGHV7-4-1	F	x	x	IGHJ4	F	IGHG2	F	CARDSDGDYW	in-frame	277	0	0	0	0	0	0	0	277	0	0
IGHV3-74	F	x	x	IGHJ4	F	IGHG2	F	CARGTWEYNLDYW	in-frame	277	0	0	0	0	0	0	0	0	277	0
IGHV4-34	F	IGHD4-4,IGHD4-11	F	IGHJ6,IGHJ5,IGHJ4	F	IGHG2	F	CARGVDYSKSGDVW	in-frame	276	0	0	0	0	0	0	0	276	0	0
IGHV3-NL1,IGHV3-30-5,IGHV3-30-3,IGHV3-30	F	IGHD1-26	F	IGHJ6	F	IGHG1	F	CAKSGSYWLREYYYYGMDVW	in-frame	276	0	0	276	0	0	0	0	0	0	0
IGHV3-49	F	IGHD4-17	F	IGHJ4	F	IGHG2	F	CTREGDYGDYW	in-frame	276	0	0	0	0	0	276	0	0	0	0
IGHV3-33	F	x	x	IGHJ4	F	IGHG2	F	CAGGSFHCSTSSYHW	in-frame	276	0	0	0	0	0	0	276	0	0	0
IGHV1-8	F	x	x	IGHJ5	F	IGHG2	F	CARAVRNQLLSDSW	in-frame	276	0	0	0	0	0	0	0	0	276	0
IGHV1-18	F	IGHD3-22	F	IGHJ4	F	IGHG2	F	CARDVRKDYYDSSGYLDSW	in-frame	276	0	0	0	0	0	0	0	0	276	0
IGHV5-51	F	x	x	IGHJ6	F	IGHG1	F	CARHIGITGSPYYYYYMDVW	in-frame	275	0	0	0	0	0	0	0	0	275	0
IGHV4-61,IGHV4-59	F	x	x	IGHJ3	F	IGHG2	F	CATVPPYHVLTGHNMELPFDVW	in-frame	275	0	0	0	0	0	275	0	0	0	0
IGHV3-23D	F	x	x	IGHJ4	F	IGHG2	F	CAKASSRTCLGAICYYFDYW	in-frame	275	0	0	0	275	0	0	0	0	0	0
IGHV3-23D	F	x	x	IGHJ4	F	IGHG2	F	CAIDSGSRGFDYW	in-frame	275	0	0	0	0	0	0	0	275	0	0
IGHV3-23D	F	IGHD2-21	F	IGHJ1	F	IGHG1	F	CAKDVRYCGGGNCMPAGNFDNW	in-frame	275	0	0	0	0	0	0	0	0	275	0
IGHV2-26	F	IGHD3-22	F	IGHJ4	F	IGHG1	F	CARISYYYDPSGLYKPGDFDYW	in-frame	275	275	0	0	0	0	0	0	0	0	0
IGHV3-9	F	IGHD3-10	F	IGHJ3	F	IGHG1	F	CAKDVYYGSGRGAFDIW	in-frame	273	0	0	0	0	0	0	0	0	273	0
IGHV1-8	F	x	x	IGHJ6	F	IGHG1	F	CARGVVVRGHYHYNIQVW	in-frame	273	0	0	0	0	0	0	273	0	0	0
IGHV1-24	F	x	x	IGHJ3	F	IGHG1	F	CATGGPTLAFW	in-frame	273	0	0	0	0	0	0	0	0	273	0
IGHV1-18	F	x	x	IGHJ4	F	IGHG2	F	CARDLGLTSGKSHGYW	in-frame	273	273	0	0	0	0	0	0	0	0	0
IGHV4-34,IGHV4-31	F	IGHD2-15	F	IGHJ4	F	IGHG2	F	CARKPERRYCSGGSCYSPIYFDYW	in-frame	272	272	0	0	0	0	0	0	0	0	0
IGHV3-7	F	x	x	IGHJ4	F	IGHG2	F	CARDNDGVLDFW	in-frame	272	0	0	0	0	272	0	0	0	0	0
IGHV3-23D	F	x	x	IGHJ4	F	IGHG1	F	CAKEIAVIGRPLFDSW	in-frame	272	0	0	0	0	0	0	0	272	0	0
IGHV3-15	F	x	x	IGHJ4	F	IGHG2	F	CSTRLSGNDWIDYW	in-frame	272	0	272	0	0	0	0	0	0	0	0
IGHV1-46	F	x	x	IGHJ4	F	IGHG1	F	CARAVEGTFPFDFW	in-frame	272	0	0	0	0	0	0	272	0	0	0
IGHV4-61	F	x	x	IGHJ5	F	IGHG2	F	CARMGEVPWNWFDPW	in-frame	271	0	0	0	0	0	0	0	0	271	0
IGHV3-73	F	IGHD3-22	F	IGHJ5,IGHJ4	F	IGHG3	F	CTRQAYVGSGFYYW	in-frame	271	0	0	0	0	271	0	0	0	0	0
IGHV3-49	F	IGHD3-10	F	IGHJ6	F	IGHG2	F	CSRAGSGTHRGYQYAMDVW	in-frame	271	0	0	0	0	0	0	271	0	0	0
IGHV2-26	F	x	x	IGHJ4	F	IGHG2	F	CTRGTLEGGYDYW	in-frame	271	0	0	0	271	0	0	0	0	0	0
IGHV4-59	F	x	x	IGHJ4	F	IGHG2	F	CVRGNYLDYW	in-frame	270	0	0	0	270	0	0	0	0	0	0
IGHV3-9	F	x	x	IGHJ3	F	IGHG2	F	CTREKSKRGALDIW	in-frame	270	0	0	0	0	0	0	0	0	270	0
IGHV3-23D	F	IGHD6-19	F	IGHJ4	F	IGHG1	F	CAKPPYFTTGFSSGWGLFDYW	in-frame	270	0	0	0	0	0	270	0	0	0	0
IGHV3-15	F	x	x	IGHJ5	F	IGHG2	F	CAGGRLSQWGTW	in-frame	270	0	0	0	0	270	0	0	0	0	0
IGHV5-51	F	IGHD2-21	F	IGHJ4	F	IGHG2	F	CARAEHCGGECYFFDYW	in-frame	268	0	0	0	0	0	0	268	0	0	0
IGHV4-39	F	IGHD2-2	F	IGHJ6	F	IGHG2	F	CASFYCSSTTCSWPGYYYVDVW	in-frame	268	0	0	0	0	0	0	268	0	0	0
IGHV3-23	F	x	x	IGHJ4	F	IGHG1	F	CAKERLRRGIDYW	in-frame	268	0	0	0	0	0	0	0	268	0	0
IGHV3-20	ORF	x	x	IGHJ4	F	IGHG2	F	CARGGANFSPTAQFYFDFW	in-frame	268	0	0	0	0	0	0	0	0	268	0
IGHV1-18	F	x	x	IGHJ4	F	IGHG2	F	CARGPQPDQPLKDGFDSW	in-frame	268	0	0	0	0	0	0	0	0	0	268
IGHV4-34	F	x	x	IGHJ4	F	IGHG1	F	CARGGNIDYFDNW	in-frame	267	0	0	0	0	0	0	0	0	267	0
IGHV2-70	F	IGHD3-9	F	IGHJ6	F	IGHG1	F	CAHRKSYYDYLTFAYDYYALDVW	in-frame	267	0	267	0	0	0	0	0	0	0	0
IGHV2-5	F	x	x	IGHJ6	F	IGHG2	F	CGHSTLGIW	in-frame	267	0	0	0	0	0	0	0	267	0	0
IGHV1-3	F	x	x	IGHJ4	F	IGHG1	F	CARVIGWSPFDSW	in-frame	267	0	0	0	0	267	0	0	0	0	0
IGHV4/OR15-8	ORF	x	x	IGHJ4	F	IGHG1	F	CARDRGAWGDVISDFWFFDSW	in-frame	266	0	0	0	0	0	0	0	0	266	0
IGHV4-61	F	IGHD6-19	F	IGHJ6	F	IGHG1	F	CARQLGYSSRYFDGLDVW	in-frame	266	0	0	0	0	0	0	266	0	0	0
IGHV3-7	F	x	x	IGHJ4	F	IGHG2	F	CARDWGNCNGDCQVDYW	in-frame	266	0	0	0	0	0	266	0	0	0	0
IGHV3-7	F	IGHD6-6	F	IGHJ4	F	IGHG2	F	CARDFEFSSSSESDCW	in-frame	266	0	0	0	0	0	0	0	0	266	0
IGHV4-61,IGHV4-38-2,IGHV4-30-2	F	IGHD1-26	F	IGHJ6	F	IGHG1	F	CARDSRFGEEGGYYGLDVW	in-frame	265	0	0	0	0	0	0	0	0	265	0
IGHV2-5	F	x	x	IGHJ2	F	IGHG1	F	CAHTGTNWYFDVW	in-frame	265	0	0	0	0	265	0	0	0	0	0
IGHV1-2	F	x	x	IGHJ4	F	IGHG1	F	CARQPGAAALFDYW	in-frame	265	0	0	0	0	0	0	0	265	0	0
IGHV3-74	F	x	x	IGHJ3	F	IGHG2	F	CARDSWYFHVW	in-frame	264	0	0	0	264	0	0	0	0	0	0
IGHV3-23D	F	x	x	IGHJ6	F	IGHG2	F	CATDPNVLIWVGNYGVDVW	in-frame	264	0	0	0	264	0	0	0	0	0	0
IGHV1-18	F	x	x	IGHJ4	F	IGHG2	F	CARNWYSSVWLTDRDYFDYW	in-frame	264	0	0	0	264	0	0	0	0	0	0
IGHV4/OR15-8	ORF	x	x	IGHJ5	F	IGHG1	F	CARQMTTFGKVFIIPACEGCNWFDPW	in-frame	263	263	0	0	0	0	0	0	0	0	0
IGHV4-39	F	x	x	IGHJ5	F	IGHG2	F	CARHAHGEYVEFGEWFDPW	in-frame	263	0	0	0	0	0	0	0	263	0	0
IGHV3-74	F	IGHD6-19	F	IGHJ6	F	IGHG1	F	CARRIGVAATGCMDVW	in-frame	263	0	263	0	0	0	0	0	0	0	0
IGHV3-15	F	x	x	IGHJ5,IGHJ4	F	IGHG2	F	CTTDWGNYGW	in-frame	263	0	0	0	0	263	0	0	0	0	0
IGHV1-2	F	IGHD6-19	F	IGHJ4	F	IGHG2	F	CAREPVDSSGWSILDYW	in-frame	263	0	0	0	0	0	263	0	0	0	0
IGHV4-59	F	IGHD4-23	ORF	IGHJ4	F	IGHG1	F	CARLRWYLGDPTIDYW	in-frame	262	0	0	0	262	0	0	0	0	0	0
IGHV3-7	F	IGHD6-13	F	IGHJ6	F	IGHG1	F	CARDRSSSWPSYYYYGMDVW	in-frame	262	262	0	0	0	0	0	0	0	0	0
IGHV3-53	F	IGHD6-19	F	IGHJ1	F	IGHG2	F	CARDSTPPNTSGWFPQYFQDW	in-frame	262	0	0	0	0	0	0	0	262	0	0
IGHV3-30-3	F	IGHD3-10	F	IGHJ6	F	IGHG1	F	CARDLYGSGTEGGMDVW	in-frame	262	0	262	0	0	0	0	0	0	0	0
IGHV3-23D	F	IGHD3-10	F	IGHJ4	F	IGHG3	F	CASNPLWFGELYFDSW	in-frame	262	0	0	0	0	262	0	0	0	0	0
IGHV3-20	ORF	x	x	IGHJ6	F	IGHG1	F	CATSKWGSSSFIYYYSYRDVW	in-frame	262	0	0	0	0	0	0	0	0	262	0
IGHV3-15	F	x	x	IGHJ4	F	IGHG1	F	CTTPYIISSGWGVDYW	in-frame	262	262	0	0	0	0	0	0	0	0	0
IGHV7-4-1	F	x	x	IGHJ3	F	IGHG2	F	CAAGVFAPVPRRGPGAFDTW	in-frame	261	0	0	0	0	261	0	0	0	0	0
IGHV4-61,IGHV4-59	F	IGHD2-2	F	IGHJ6	F	IGHG1	F	CARTSSVPAAIGHYMDVW	in-frame	261	0	0	0	0	0	0	261	0	0	0
IGHV4-39	F	x	x	IGHJ6	F	IGHG1	F	CARLAPERTAVDFSYNVDVW	in-frame	261	0	0	0	0	0	0	0	0	261	0
IGHV4-39	F	IGHD6-19	F	IGHJ6	F	IGHG1	F	CARLSESSGWYEAHYRSYMDVW	in-frame	261	0	0	0	0	0	0	261	0	0	0
IGHV3-23	F	x	x	IGHJ4	F	IGHG1	F	CAKDIRSAYW	in-frame	261	0	0	0	0	0	0	0	261	0	0
IGHV3-15	F	x	x	IGHJ3	F	IGHG2	F	CTCWSYSAFDIW	in-frame	261	0	261	0	0	0	0	0	0	0	0
IGHV1-18	F	x	x	IGHJ6	F	IGHG2	F	CASGRYFHYGMDVW	in-frame	261	0	0	0	0	0	261	0	0	0	0
IGHV1-18	F	IGHD3-22	F	IGHJ4	F	IGHG2	F	CARGDYYDSGGWLDYW	in-frame	261	0	0	0	0	0	0	261	0	0	0
IGHV4-34	F	x	x	IGHJ4	F	IGHG1	F	CTRGYGSSANW	in-frame	260	0	0	0	0	0	0	260	0	0	0
IGHV3-7	F	x	x	IGHJ4	F	IGHG1	F	CLAGYSSSGAFW	in-frame	260	260	0	0	0	0	0	0	0	0	0
IGHV3-23D	F	x	x	IGHJ4	F	IGHG1	F	CTRHLSGSPVFFDFW	in-frame	260	0	0	0	0	260	0	0	0	0	0
IGHV2-5	F	x	x	IGHJ4	F	IGHG1	F	CAHNYIISVAEVPFDYW	in-frame	260	0	0	260	0	0	0	0	0	0	0
IGHV2-26	F	x	x	IGHJ3	F	IGHG2	F	CARTWRQLLYEAFDVW	in-frame	260	0	0	0	260	0	0	0	0	0	0
IGHV4-34,IGHV4-31	F	IGHD3-10	F	IGHJ4	F	IGHG2	F	CASWKDYYGLWEGYW	in-frame	259	0	0	0	0	0	0	259	0	0	0
IGHV3-9	F	IGHD6-19	F	IGHJ4	F	IGHG1	F	CAKDDSYTSGWLGYW	in-frame	259	0	0	0	0	0	0	0	0	259	0
IGHV3-48	F	x	x	IGHJ4	F	IGHG1	F	CARGRDSLWYW	in-frame	259	0	259	0	0	0	0	0	0	0	0
IGHV3-11	F	IGHD2-15	F	IGHJ3	F	IGHG1	F	CARGAGYCSGGSCILANVFDIW	in-frame	259	0	0	0	0	0	0	0	0	259	0
IGHV3-9	F	x	x	IGHJ3	F	IGHG1	F	CVKDLMSGAAHVFNAFDVW	in-frame	258	0	0	0	0	0	0	258	0	0	0
IGHV2-70,IGHV2-5	F	x	x	IGHJ4	F	IGHG2	F	CARRAILPGAWDVGFFDHW	in-frame	258	0	0	0	0	0	0	0	0	258	0
IGHV2-26	F	x	x	IGHJ6	F	IGHG1	F	CARIVDSSWGYYGMDVW	in-frame	258	0	0	0	258	0	0	0	0	0	0
IGHV1-3	F	IGHD5-5,IGHD5-18	F	IGHJ5	F	IGHG2	F	CARGYSYGPSNWLDPW	in-frame	258	0	0	0	0	0	0	0	0	258	0
IGHV5-51	F	x	x	IGHJ4	F	IGHG1	F	CARRRSSDRGWDYW	in-frame	257	0	0	257	0	0	0	0	0	0	0
IGHV3-7	F	x	x	IGHJ4	F	IGHG2	F	CTGAGYNAHW	in-frame	257	0	0	0	0	0	0	0	257	0	0
IGHV3-15	F	x	x	IGHJ3	F	IGHG2	F	CVRWDYSAFDIW	in-frame	257	0	257	0	0	0	0	0	0	0	0
IGHV2-5	F	x	x	IGHJ4	F	IGHG1	F	CARRFNGGLRPPYFDAW	in-frame	257	0	0	0	0	0	0	0	257	0	0
IGHV4-34	F	x	x	IGHJ6	F	IGHG1	F	CVRGPTRIVAATDSYYFYGMDVW	in-frame	256	0	0	0	0	0	256	0	0	0	0
IGHV3-NL1	F	IGHD1-1	F	IGHJ6	F	IGHG1	F	CAKLGLQLERGGAVGSYYYYYMDVW	in-frame	256	0	0	0	0	0	0	256	0	0	0
IGHV3-15	F	x	x	IGHJ3	F	IGHG2	F	CTTASDSSNYDDGLDIW	in-frame	256	0	0	0	0	0	256	0	0	0	0
IGHV2-5	F	x	x	IGHJ5	F	IGHG2	F	CAHEGYGSDNWYDPW	in-frame	256	0	0	0	256	0	0	0	0	0	0
IGHV3-15	F	IGHD5-24	ORF	IGHJ4	F	IGHG1	F	CTTDRDGYHYFDSW	in-frame	255	0	0	0	0	0	255	0	0	0	0
IGHV4-61,IGHV4-4	ORF	x	x	IGHJ4	F	IGHG1	F	CAREDEDGGYFDYW	in-frame	254	0	254	0	0	0	0	0	0	0	0
IGHV4-61	F	x	x	IGHJ4	F	IGHG2	F	CARVMGMMTAVRFDLW	in-frame	254	0	0	0	0	0	0	0	0	254	0
IGHV4-59	F	x	x	IGHJ5	F	IGHG1	F	CAGGSYAGSANSETYYWFDPW	in-frame	254	0	0	0	0	0	0	0	254	0	0
IGHV4-39	F	IGHD3-22	F	IGHJ2	F	IGHG1	F	CARATDPKTHYSGSRGYYSLGYFDLW	in-frame	253	0	0	0	0	0	253	0	0	0	0
IGHV3-49	F	x	x	IGHJ4,IGHJ5	F	IGHG2	F	CARGQRWTLGLW	in-frame	253	0	0	0	0	0	0	0	0	253	0
IGHV2-5	F	x	x	IGHJ4	F	IGHG1	F	CAHKMNDFLTHSGSFDYW	in-frame	253	0	0	0	0	0	0	0	0	253	0
IGHV1-3	F	IGHD2-2	F	IGHJ4	F	IGHG2	F	CARGYCSSTSCQYYFDNW	in-frame	253	0	0	0	0	0	0	0	253	0	0
IGHV3-7	F	IGHD6-13	F	IGHJ1,IGHJ5,IGHJ4	F	IGHG2	F	CVAGGATSSWYWRHW	in-frame	252	0	0	0	0	0	252	0	0	0	0
IGHV3-49	F	IGHD3/OR15-3b,IGHD3/OR15-3a	ORF	IGHJ1	F	IGHG2	F	CTTYYTPGSWYTFEHW	in-frame	252	252	0	0	0	0	0	0	0	0	0
IGHV3-33	F	x	x	IGHJ4	F	IGHG2	F	CVRSSYYDGSGFYWGLFDYW	in-frame	252	0	0	0	0	0	0	0	0	252	0
IGHV3-33	F	x	x	IGHJ4	F	IGHG1	F	CTSAFGFHPFDYW	in-frame	252	0	0	0	0	0	0	0	252	0	0
IGHV1-46	F	x	x	IGHJ4	F	IGHG2	F	CAKERVVGKDFDTW	in-frame	252	0	0	0	0	0	0	252	0	0	0
IGHV4-34,IGHV4-31	F	x	x	IGHJ4	F	IGHG2	F	CARGGWTQSTDSW	in-frame	251	0	0	0	0	0	0	0	0	251	0
IGHV3-74	F	IGHD2-2	F	IGHJ5	F	IGHG2	F	CSSWYGGFDPW	in-frame	251	0	0	0	251	0	0	0	0	0	0
IGHV3-23D	F	x	x	IGHJ4	F	IGHG2	F	CVKDFLLARAGFFEDW	in-frame	251	0	0	0	0	251	0	0	0	0	0
IGHV3-23D	F	x	x	IGHJ4	F	IGHG2	F	CAKLRGNYITNWFFEYW	in-frame	251	0	0	0	0	0	0	251	0	0	0
IGHV3-15	F	x	x	IGHJ4	F	IGHG2	F	CTTRPVHTRMAYLWDYW	in-frame	251	0	0	0	0	0	0	251	0	0	0
IGHV6-1	F	IGHD2-15	F	IGHJ4	F	IGHG2	F	CARTYCSDGTCYGRPSPFDYW	in-frame	250	0	0	0	0	0	0	0	250	0	0
IGHV4-4	F	x	x	IGHJ4	F	IGHG1	F	CARDPWGDHDYW	in-frame	250	0	250	0	0	0	0	0	0	0	0
IGHV3-NL1,IGHV3-30-5,IGHV3-30-3,IGHV3-30	F	IGHD6-19	F	IGHJ3	F	IGHG2	F	CAKVIHPGRIPVAGRVFDVW	in-frame	250	0	0	0	0	250	0	0	0	0	0
IGHV3-15	F	x	x	IGHJ4	F	IGHG2	F	CTTRVVTTNDYW	in-frame	250	0	250	0	0	0	0	0	0	0	0
IGHV3-11	F	x	x	IGHJ4	F	IGHG1	F	CARGFYEWDYW	in-frame	250	0	0	250	0	0	0	0	0	0	0
IGHV2-26	F	x	x	IGHJ5,IGHJ4	F	IGHG2	F	CARSPGYSLDSW	in-frame	250	0	0	0	250	0	0	0	0	0	0
IGHV4-61	F	x	x	IGHJ5	F	IGHG2	F	CARGGTSSLPLESW	in-frame	249	249	0	0	0	0	0	0	0	0	0
IGHV4-34	F	x	x	IGHJ3	F	IGHG2	F	CARYTSGAFDVW	in-frame	249	0	0	0	0	0	249	0	0	0	0
IGHV3-71	P	IGHD1-26	F	IGHJ4	F	IGHG2	F	CAREEVSGSYYFDYW	in-frame	249	0	0	0	0	0	0	249	0	0	0
IGHV3-7,IGHV3-69-1,IGHV3-48	F	IGHD3-10	F	IGHJ4	F	IGHG1	F	CARDHPPRMVRGPFDSW	in-frame	249	0	0	0	0	0	0	249	0	0	0
IGHV4-30-4	F	IGHD3-22	F	IGHJ4	F	IGHG1	F	CATGTNKGDDFYDNSGYDYW	in-frame	248	0	248	0	0	0	0	0	0	0	0
IGHV3-9	F	x	x	IGHJ6	F	IGHG2	F	CASSAERDYYFYPMDVW	in-frame	248	0	0	0	0	0	0	0	0	248	0
IGHV3-9	F	IGHD1-7	F	IGHJ5	F	IGHG1	F	CVKDANWNYGIGNWFDSW	in-frame	248	0	0	0	0	0	0	0	248	0	0
IGHV3-74	F	x	x	IGHJ4	F	IGHG1	F	CARDVCGSDDFW	in-frame	248	0	0	0	0	0	0	248	0	0	0
IGHV1-18	F	x	x	IGHJ4	F	IGHG1	F	CARVRAASRHRMTGESDYW	in-frame	248	0	0	0	0	0	0	0	248	0	0
IGHV1-18	F	x	x	IGHJ4	F	IGHG1	F	CARDLAGAGTGADYW	in-frame	248	0	0	0	0	0	248	0	0	0	0
IGHV3-9	F	IGHD6-19	F	IGHJ4	F	IGHG1	F	CAKDMGLEIAVAGDYW	in-frame	247	0	0	0	0	0	0	0	247	0	0
IGHV3-7	F	x	x	IGHJ1	F	IGHG2	F	CARSRGPSIW	in-frame	247	247	0	0	0	0	0	0	0	0	0
IGHV3-15	F	x	x	IGHJ5	F	IGHG2	F	CTVGMGDHW	in-frame	247	247	0	0	0	0	0	0	0	0	0
IGHV1-69	F	x	x	IGHJ4	F	IGHG2	F	CARSIPDSICRGYCGYFDRW	in-frame	247	0	0	0	0	0	0	0	0	0	247
IGHV3-43	F	x	x	IGHJ4	F	IGHG2	F	CVKDNDCPTCNFDYW	in-frame	246	0	0	0	0	0	0	0	246	0	0
IGHV3-23D	F	x	x	IGHJ4	F	IGHG2	F	CVKNRGFGWRYHFDYW	in-frame	246	0	0	0	0	246	0	0	0	0	0
IGHV4-61	F	x	x	IGHJ6	F	IGHG2	F	CARERLPASGMDVW	in-frame	245	0	0	0	245	0	0	0	0	0	0
IGHV4-61	F	x	x	IGHJ4	F	IGHG2	F	CASLPDISGWPFESW	in-frame	245	0	0	0	0	0	245	0	0	0	0
IGHV4-59	F	x	x	IGHJ5	F	IGHG1	F	CARGLPTAAGFDPW	in-frame	245	0	0	0	0	0	245	0	0	0	0
IGHV4-59	F	x	x	IGHJ4	F	IGHG1	F	CARHSGASFDSW	in-frame	245	0	0	0	0	0	245	0	0	0	0
IGHV3-9	F	x	x	IGHJ3	F	IGHG2	F	CAKGPWRLSLDAFDIW	in-frame	245	0	0	0	245	0	0	0	0	0	0
IGHV3-74	F	x	x	IGHJ3	F	IGHG2	F	CARGGHYVLDGFDIW	in-frame	245	0	245	0	0	0	0	0	0	0	0
IGHV3-69-1	P	x	x	IGHJ1	F	IGHG2	F	CARNGGDDWKYFQYW	in-frame	245	0	0	0	0	0	245	0	0	0	0
IGHV2-5	F	x	x	IGHJ4	F	IGHG1	F	CAHNGPTRNWFFDYW	in-frame	245	0	0	0	0	0	0	0	245	0	0
IGHV2-5	F	x	x	IGHJ2	F	IGHG1	F	CVPTSI**W	out-of-frame	245	0	0	0	0	0	0	245	0	0	0
IGHV4-61,IGHV4-59	F	x	x	IGHJ5	F	IGHG2	F	CARESAGGGVEDYFDPW	in-frame	244	244	0	0	0	0	0	0	0	0	0
IGHV3-9	F	x	x	IGHJ4	F	IGHG2	F	CAKSAAATGRAHRLENW	in-frame	244	0	0	0	0	0	244	0	0	0	0
IGHV4-61	F	IGHD3-22	F	IGHJ6	F	IGHG1	F	CARDTCYFDSSGYCKHYYGMDVW	in-frame	243	0	0	0	0	243	0	0	0	0	0
IGHV3-9	F	x	x	IGHJ4	F	IGHG2	F	CAKVTHQGYGAGGSYRAFDSW	in-frame	243	0	0	0	0	0	243	0	0	0	0
IGHV3-73	F	x	x	IGHJ6	F	IGHG2	F	CARHRPRIGSSVFYGMDVW	in-frame	243	0	0	0	0	0	0	0	243	0	0
IGHV3-53	F	x	x	IGHJ5	F	IGHG2	F	CARGGSWLDCW	in-frame	243	0	243	0	0	0	0	0	0	0	0
IGHV3-33,IGHV3-30	F	IGHD1-26	F	IGHJ4	F	IGHG2	F	CARESGSYFDYW	in-frame	243	0	0	0	0	0	0	243	0	0	0
IGHV4-61	F	IGHD4-17	F	IGHJ4	F	IGHG1	F	CARERRYGDYSLDSW	in-frame	242	0	0	0	242	0	0	0	0	0	0
IGHV3-49	F	IGHD3-10	F	IGHJ5	F	IGHG2	F	CTRTYGSGSYADSW	in-frame	242	0	0	0	242	0	0	0	0	0	0
IGHV3-23D	F	IGHD6-19	F	IGHJ4	F	IGHG2	F	CAKDRVQSPQWLVLGFDYW	in-frame	242	0	0	0	0	0	0	0	0	242	0
IGHV7-4-1	F	x	x	IGHJ4	F	IGHG1	F	CARGGVKDFW	in-frame	241	0	0	0	241	0	0	0	0	0	0
IGHV4-59,IGHV4-34,IGHV4-31	F	x	x	IGHJ5	F	IGHG1	F	CARWYGGPTARFDHW	in-frame	241	0	0	0	0	0	0	241	0	0	0
IGHV3-9	F	IGHD6-19	F	IGHJ4	F	IGHG1	F	CAKDTQYLAVAGNFDCW	in-frame	241	0	0	241	0	0	0	0	0	0	0
IGHV3-23D	F	x	x	IGHJ4	F	IGHG2	F	CVKDRGGQYW	in-frame	241	241	0	0	0	0	0	0	0	0	0
IGHV3-23D	F	x	x	IGHJ3	F	IGHG1	F	CAKDGGLRGVDDSFDIW	in-frame	241	0	241	0	0	0	0	0	0	0	0
IGHV1-18	F	IGHD2-2,IGHD2-8	F	IGHJ5	F	IGHG2	F	CARDLGYCTTSSCEREWFDPW	in-frame	241	0	0	0	0	0	0	0	0	241	0
IGHV7-4-1	F	IGHD2-2	F	IGHJ4	F	IGHG2	F	CARESCGPSSCYAFLDNW	in-frame	240	0	0	0	0	0	0	240	0	0	0
IGHV3-23D	F	IGHD3-22	F	IGHJ2	F	IGHG1	F	CAKDGRYYYDTSGYSQDWYFDLW	in-frame	240	0	0	0	0	0	0	240	0	0	0
IGHV3-15	F	x	x	IGHJ4	F	IGHG2	F	CSTEDWYRFTQW	in-frame	240	0	0	0	0	0	240	0	0	0	0
IGHV3-15	F	x	x	IGHJ3	F	IGHG2	F	CARWSYSAFDIW	in-frame	240	0	240	0	0	0	0	0	0	0	0
IGHV2-70,IGHV2-5	F	IGHD3-22	F	IGHJ4	F	IGHG1	F	CAHIPYYDRSGNYDPTLPFTYW	in-frame	240	0	240	0	0	0	0	0	0	0	0
IGHV3-9	F	x	x	IGHJ6	F	IGHG2	F	CGKDITAGGMDVW	in-frame	239	0	0	0	0	0	239	0	0	0	0
IGHV3-20	ORF	IGHD3-3	F	IGHJ4	F	IGHG1	F	CARAPRVTIFGAAFDW	in-frame	239	0	0	0	0	0	0	0	0	0	239
IGHV1-18	F	IGHD3-10	F	IGHJ4	F	IGHG4	F	CARGGSGSYDFW	in-frame	239	0	0	0	0	0	0	0	0	239	0
IGHV3-23D	F	IGHD6-13	F	IGHJ4	F	IGHG2	F	CAKKPAAGLSPLDYW	in-frame	238	0	0	0	0	0	0	0	238	0	0
IGHV3-15	F	x	x	IGHJ4	F	IGHG1	F	CTTGAIGWAFDSW	in-frame	238	0	0	0	0	0	238	0	0	0	0
IGHV3-15	F	x	x	IGHJ3	F	IGHG2	F	CSRWDYSAFDIW	in-frame	238	0	238	0	0	0	0	0	0	0	0
IGHV3-15	F	IGHD6-19	F	IGHJ4	F	IGHG2	F	CATGVGQWLVRDYW	in-frame	238	0	238	0	0	0	0	0	0	0	0
IGHV1-3	F	x	x	IGHJ4	F	IGHG2	F	CARAPFGKSRMDYW	in-frame	238	0	238	0	0	0	0	0	0	0	0
IGHV1-18	F	IGHD6-13	F	IGHJ4	F	IGHG2	F	CAKDAYSSWYFDAW	in-frame	238	0	0	0	0	238	0	0	0	0	0
IGHV3-69-1	P	x	x	IGHJ5	F	IGHG2	F	CARDRSGSSRGWLDPW	in-frame	237	0	0	0	0	0	0	0	0	0	237
IGHV3-23D,IGHV3-23	F	x	x	IGHJ4	F	IGHG1	F	CATEEFDYW	in-frame	237	0	0	0	0	0	0	0	0	237	0
IGHV3-9	F	x	x	IGHJ6	F	IGHG1	F	CAKDIGYRKYYYYYGMDVW	in-frame	236	0	0	0	0	0	0	236	0	0	0
IGHV3-15	F	x	x	IGHJ4	F	IGHG2	F	CTTRWFHDHLGPLPKGDYW	in-frame	236	0	0	0	0	0	0	0	0	236	0
IGHV1-18	F	x	x	IGHJ6	F	IGHG1	F	CAAAIAVRRRLFNPHTMDVW	in-frame	236	0	0	0	0	0	0	0	236	0	0
IGHV3-23D	F	x	x	IGHJ4	F	IGHG1	F	CAKDSDRYQRSDSW	in-frame	235	0	0	235	0	0	0	0	0	0	0
IGHV3-23D	F	IGHD6-13	F	IGHJ4	F	IGHG2	F	CVKDNYAGRSSWYAFHSW	in-frame	235	0	0	0	235	0	0	0	0	0	0
IGHV7-4-1	F	IGHD3-10	F	IGHJ6	F	IGHG1	F	CARVWGSGSYYHYYYGMDVW	in-frame	234	0	234	0	0	0	0	0	0	0	0
IGHV5-51	F	IGHD6-13	F	IGHJ4	F	IGHG2	F	CARLGPYSSSWPEYW	in-frame	234	234	0	0	0	0	0	0	0	0	0
IGHV4-39	F	x	x	IGHJ4	F	IGHG1	F	CARLRYWTYDETSGYQTYYFDYW	in-frame	234	0	0	0	0	0	0	234	0	0	0
IGHV4-34	F	x	x	IGHJ6	F	IGHG4	F	CARGPTRIVEATDSYSFYGMDVW	in-frame	234	0	0	0	0	0	234	0	0	0	0
IGHV3-7,IGHV3-69-1,IGHV3-48	F	x	x	IGHJ6	F	IGHG4	F	CARVLSFRVSTGAMDVW	in-frame	234	0	0	0	0	0	234	0	0	0	0
IGHV3-49	F	x	x	IGHJ6	F	IGHG1	F	CTRGRTEGGAGTYFYYGVDVW	in-frame	234	0	0	0	0	0	0	0	0	234	0
IGHV3-33	F	IGHD3-10	F	IGHJ4	F	IGHG2	F	CAKSDGSGSYDDYW	in-frame	234	0	0	0	0	0	0	0	0	234	0
IGHV3-15	F	x	x	IGHJ5,IGHJ4	F	IGHG2	F	CTTWSYSSLGLW	in-frame	234	0	234	0	0	0	0	0	0	0	0
IGHV1-3	F	x	x	IGHJ4	F	IGHG2	F	CARELDYFDFW	in-frame	234	0	0	0	0	0	0	0	0	234	0
IGHV5-51	F	x	x	IGHJ4	F	IGHG1	F	CARLTYGDPPLDYW	in-frame	233	0	0	0	0	0	0	0	233	0	0
IGHV3/OR16-9,IGHV3-7,IGHV3-69-1,IGHV3-48	ORF	x	x	IGHJ4	F	IGHG2	F	CLAGYSSSGAFW	in-frame	233	233	0	0	0	0	0	0	0	0	0
IGHV3-7	F	x	x	IGHJ4	F	IGHG2	F	CVRERPRDDFNIVFDYW	in-frame	233	233	0	0	0	0	0	0	0	0	0
IGHV3-33	F	x	x	IGHJ5	F	IGHG2	F	CARDGEALTQTRRNWLDPW	in-frame	233	0	0	0	0	0	0	0	233	0	0
IGHV2-70	F	IGHD3-10	F	IGHJ4	F	IGHG2	F	CAHLFNTYYSGSGSYYNFDQW	in-frame	233	0	0	0	0	233	0	0	0	0	0
IGHV4-39	F	IGHD4-17	F	IGHJ4	F	IGHG1	F	CARHVWDYGDNRFDYW	in-frame	232	0	0	0	0	0	0	232	0	0	0
IGHV4-34,IGHV4-31	F	x	x	IGHJ4	F	IGHG2	F	CARGYGGFDYW	in-frame	232	0	0	0	0	0	0	232	0	0	0
IGHV3-48	F	x	x	IGHJ6	F	IGHG2	F	CVREIAAERVFHYFDVW	in-frame	232	0	0	0	0	0	0	0	232	0	0
IGHV3-23D	F	x	x	IGHJ4	F	IGHG1	F	CAKEMGHRIAEGGIDYW	in-frame	232	0	232	0	0	0	0	0	0	0	0
IGHV1-8	F	x	x	IGHJ4	F	IGHG2	F	CTRGGRWPNTEAYFDYW	in-frame	232	0	0	232	0	0	0	0	0	0	0
IGHV1-18	F	x	x	IGHJ3	F	IGHG2	F	CARCFDPGAWPWPAFDIW	in-frame	232	0	0	0	0	0	0	232	0	0	0
IGHV3-73	F	IGHD3-10	F	IGHJ2	F	IGHG3	F	CTRHGMVRGNWYFDLW	in-frame	231	0	0	0	0	0	0	231	0	0	0
IGHV3-7	F	IGHD3-16	F	IGHJ3	F	IGHG1	F	CARSPPLNEDVGGSYHYTAVSGLDIW	in-frame	231	0	0	0	0	0	0	0	0	231	0
IGHV3-49	F	x	x	IGHJ1	F	IGHG2	F	CTTYYSSSWYVFQHW	in-frame	231	231	0	0	0	0	0	0	0	0	0
IGHV3-33	F	x	x	IGHJ5	F	IGHG2	F	CARGGSGGPEFELW	in-frame	231	0	0	0	0	0	0	231	0	0	0
IGHV3-74	F	IGHD3-10	F	IGHJ3	F	IGHG1	F	CARDFRVTMVRGVISDAFDIW	in-frame	230	0	0	0	0	0	230	0	0	0	0
IGHV3-33	F	x	x	IGHJ6	F	IGHG2	F	CAKVDYAGGGYHYGMDAW	in-frame	230	0	0	0	0	0	0	0	0	230	0
IGHV3-30,IGHV3-33	F	x	x	IGHJ4	F	IGHG2	F	CARDDCTTTSCYGHW	in-frame	230	0	0	0	0	230	0	0	0	0	0
IGHV3-13	F	x	x	IGHJ3	F	IGHG2	F	CVRDPGPGTSAFDIW	in-frame	230	0	0	230	0	0	0	0	0	0	0
IGHV2-5	F	x	x	IGHJ4	F	IGHG2	F	CAHFRGKWLPPDYW	in-frame	230	0	0	0	0	0	0	0	0	230	0
IGHV1-18	F	x	x	IGHJ4	F	IGHG2	F	CARDRGGNEPFDYW	in-frame	230	230	0	0	0	0	0	0	0	0	0
IGHV1-18	F	x	x	IGHJ4	F	IGHG2	F	CARAGNTNYDMNDYW	in-frame	230	0	0	0	230	0	0	0	0	0	0
IGHV1-18	F	x	x	IGHJ3	F	IGHG1	F	CARHVDLITLVQVVPTAFDIW	in-frame	230	0	0	0	0	0	0	0	230	0	0
IGHV4/OR15-8	ORF	x	x	IGHJ4	F	IGHG1	F	CARDFALAGMQYFFDSW	in-frame	229	0	0	0	0	0	0	0	0	229	0
IGHV4-61,IGHV4-59	F	x	x	IGHJ5	F	IGHG2	F	CARESSGDHRNNWFDPW	in-frame	229	0	0	0	0	0	0	0	0	229	0
IGHV4-34,IGHV4-31	F	x	x	IGHJ4	F	IGHG1	F	CARDKKNFDSSGVFDYW	in-frame	229	0	0	0	0	0	0	0	0	229	0
IGHV4-34,IGHV4-31	F	IGHD3-9	F	IGHJ4	F	IGHG1	F	CARQNDILTGYNNW	in-frame	229	0	0	0	0	0	0	229	0	0	0
IGHV3-9	F	x	x	IGHJ3	F	IGHG1	F	CARGRSGTNHDAFDIW	in-frame	229	0	229	0	0	0	0	0	0	0	0
IGHV3-7	F	x	x	IGHJ4	F	IGHG1	F	CARPDRDVHQIVFYFDYW	in-frame	229	0	0	0	0	0	229	0	0	0	0
IGHV3-66,IGHV3-64	F	IGHD3-10	F	IGHJ5	F	IGHG1	F	CASNTYYYASGNFYTSFDHW	in-frame	229	0	229	0	0	0	0	0	0	0	0
IGHV2-26	F	x	x	IGHJ4	F	IGHG1	F	CARIPMVGNYFDYW	in-frame	229	229	0	0	0	0	0	0	0	0	0
IGHV4-61	F	IGHD3-22	F	IGHJ4	F	IGHG2	F	CAREGYYDSRGYYLGYW	in-frame	228	0	0	0	0	0	0	0	0	228	0
IGHV3-53	F	x	x	IGHJ4	F	IGHG1	F	CSRYTAYW	in-frame	228	0	0	0	0	0	0	0	0	228	0
IGHV3-23D	F	x	x	IGHJ4	F	IGHG2	F	CTKARGSPWAQHCFDYW	in-frame	228	0	0	0	0	228	0	0	0	0	0
IGHV3-15	F	x	x	IGHJ4	F	IGHG2	F	CAEGWGFFNSW	in-frame	228	0	0	0	228	0	0	0	0	0	0
IGHV1-3	F	x	x	IGHJ4	F	IGHG1	F	CVRGWGKMLTSYDYW	in-frame	228	0	0	0	0	0	0	228	0	0	0
IGHV1-18	F	x	x	IGHJ4	F	IGHG1	F	CARDRNAQPRGYRGHPSSIVYW	in-frame	228	0	0	0	0	0	0	228	0	0	0
IGHV4-34,IGHV4-31	F	x	x	IGHJ5	F	IGHG1	F	CARGGGLSLRFRWFNPW	in-frame	227	0	0	0	0	0	0	0	0	227	0
IGHV4-34,IGHV4-31	F	x	x	IGHJ4	F	IGHG2	F	CASWKDYYGLWKGYW	in-frame	227	0	0	0	0	0	0	227	0	0	0
IGHV3-7,IGHV3-21	F	x	x	IGHJ2	F	IGHG2	F	CGREGSWHGGYWYFDRW	in-frame	227	0	0	0	0	227	0	0	0	0	0
IGHV3-15	F	x	x	IGHJ4	F	IGHG2	F	CTTDHSSNWYGFEDW	in-frame	227	0	0	0	0	0	0	227	0	0	0
IGHV3-74	F	x	x	IGHJ4	F	IGHG2	F	CARSSSGGLCPDW	in-frame	226	0	0	0	0	0	0	0	226	0	0
IGHV1/OR15-4	P	IGHD2-15	F	IGHJ4	F	IGHG1	F	CATDVQEHCSGGSCSPLYYFDFW	in-frame	226	0	0	0	0	0	0	226	0	0	0
IGHV1-46	F	x	x	IGHJ6	F	IGHG2	F	CAAASPTLGTHYYYIMDVW	in-frame	226	226	0	0	0	0	0	0	0	0	0
IGHV3-NL1,IGHV3-30-5,IGHV3-30-3,IGHV3-30	F	x	x	IGHJ5	F	IGHG2	F	CVKERATSGRAGCFDPW	in-frame	225	0	225	0	0	0	0	0	0	0	0
IGHV2-70	F	IGHD4-17	F	IGHJ3	F	IGHG1	F	CTLTEHDYGDYVNASAIW	in-frame	225	0	0	0	0	0	0	225	0	0	0
IGHV4-59	F	IGHD3-10	F	IGHJ4	F	IGHG1	F	CARGTSYYDSGTYYNPAFDFW	in-frame	224	0	0	0	0	224	0	0	0	0	0
IGHV3-NL1,IGHV3-30-5,IGHV3-30-3,IGHV3-30	F	x	x	IGHJ4	F	IGHG1	F	CAKGHRAFTMPRSTLAYFDYW	in-frame	224	0	224	0	0	0	0	0	0	0	0
IGHV3-15	F	IGHD3-10	F	IGHJ3	F	IGHG2	F	CVRWDYSAFDIW	in-frame	224	0	224	0	0	0	0	0	0	0	0
IGHV1-18	F	x	x	IGHJ4,IGHJ1	F	IGHG1	F	CARAKGWYYGEVYW	in-frame	224	0	0	0	0	0	0	224	0	0	0
IGHV4-34,IGHV4-31	F	IGHD5-5,IGHD5-18	F	IGHJ6	F	IGHG1	F	CARTRRDGEYTYGLGYMDVW	in-frame	223	0	0	0	0	0	0	0	223	0	0
IGHV3-7	F	x	x	IGHJ4	F	IGHG2	F	CNLISDW	in-frame	223	0	0	0	0	0	0	0	0	223	0
IGHV3-23D	F	x	x	IGHJ4	F	IGHG3	F	CAKDREMVDTRRGYYFDYW	in-frame	223	0	0	0	0	0	223	0	0	0	0
IGHV4-34,IGHV4-31	F	x	x	IGHJ4	F	IGHG1	F	CARGLSRYYFDYW	in-frame	222	0	0	0	0	0	222	0	0	0	0
IGHV4-34,IGHV4-31	F	x	x	IGHJ3	F	IGHG1	F	CARERTGAFDIW	in-frame	222	0	0	0	0	0	0	0	0	222	0
IGHV3-NL1,IGHV3-30-5,IGHV3-30-3,IGHV3-30	F	IGHD1-1	F	IGHJ6	F	IGHG1	F	CAKLGLQLERGGAVGSYYYYYMDVW	in-frame	222	0	0	0	0	0	0	222	0	0	0
IGHV3-7	F	x	x	IGHJ4	F	IGHG1	F	CGRGASMANW	in-frame	222	0	0	0	0	0	0	0	222	0	0
IGHV3-7	F	x	x	IGHJ4	F	IGHG1	F	CASWGTPGISAASDYW	in-frame	222	0	222	0	0	0	0	0	0	0	0
IGHV3-48	F	IGHD4-17	F	IGHJ4	F	IGHG2	F	CARDEDGDYDFDYW	in-frame	222	0	222	0	0	0	0	0	0	0	0
IGHV3-11	F	IGHD2-21	F	IGHJ4	F	IGHG2	F	CARGHCHGGGCGNLDHW	in-frame	222	0	0	0	0	0	0	222	0	0	0
IGHV1-18	F	x	x	IGHJ6	F	IGHG1	F	CARDIGTNETYPLYYYYLDVW	in-frame	222	0	0	0	0	0	0	222	0	0	0
IGHV6-1	F	IGHD6-19	F	IGHJ4	F	IGHG1	F	CARELGSGWEIYYFDYW	in-frame	221	221	0	0	0	0	0	0	0	0	0
IGHV4/OR15-8	ORF	x	x	IGHJ6	F	IGHG2	F	CARSARLVRVNYMDVW	in-frame	221	0	0	0	0	0	0	0	0	221	0
IGHV3-9	F	IGHD2-2	F	IGHJ3	F	IGHG2	F	CARGQPYCVSTGCYTGGPFDIW	in-frame	221	0	0	0	0	0	0	0	0	221	0
IGHV3-23D	F	x	x	IGHJ4	F	IGHG1	F	CAKDFEERDIVRLRFGDYFDYW	in-frame	221	0	221	0	0	0	0	0	0	0	0
IGHV4-61,IGHV4-59	F	x	x	IGHJ4	F	IGHG1	F	CAASLVLSNSLYAAIDYW	in-frame	220	0	0	0	0	0	0	220	0	0	0
IGHV4-34	F	x	x	IGHJ4	F	IGHG1	F	CVRVVSGTMLFDSW	in-frame	220	0	0	0	0	0	0	220	0	0	0
IGHV3-9	F	IGHD3-10	F	IGHJ4	F	IGHG2	F	CAKEARIYYLGSGSYGHEYW	in-frame	220	220	0	0	0	0	0	0	0	0	0
IGHV3-74	F	x	x	IGHJ5	F	IGHG1	F	CAKVSFSCSGFTCPYWLDLW	in-frame	220	0	0	0	0	0	0	220	0	0	0
IGHV3-49	F	x	x	IGHJ1	F	IGHG1	F	CTTYYGTNWPVFRHW	in-frame	220	220	0	0	0	0	0	0	0	0	0
IGHV3-33	F	x	x	IGHJ4	F	IGHG2	F	CAKDPNWAGDCW	in-frame	220	0	0	0	0	0	0	0	0	220	0
IGHV3-23D	F	x	x	IGHJ4	F	IGHG1	F	CARAFGRVDPFDFW	in-frame	220	0	220	0	0	0	0	0	0	0	0
IGHV3-23	F	IGHD3-10	F	IGHJ6	F	IGHG2	F	CANEGSFSGSYYYYYYGMDVW	in-frame	220	0	0	0	0	0	0	0	0	220	0
IGHV3-15	F	x	x	IGHJ4	F	IGHG2	F	CTSSAYW	in-frame	220	0	0	0	220	0	0	0	0	0	0
IGHV3-15	F	IGHD5-24	ORF	IGHJ4	F	IGHG3	F	CVTDVDMATVWGYW	in-frame	220	0	0	0	0	0	220	0	0	0	0
IGHV6-1	F	x	x	IGHJ4	F	IGHG1	F	CVRSGHGNNAGKFDSW	in-frame	219	0	0	0	0	0	219	0	0	0	0
IGHV5-51	F	IGHD3-10	F	IGHJ4	F	IGHG2	F	CGRPYGSGNYYNLEFDYW	in-frame	219	0	0	0	0	0	0	0	0	219	0
IGHV4-61,IGHV4-59	F	x	x	IGHJ4	F	IGHG1	F	CARVARRKWEIFTGYSDFFDSW	in-frame	219	0	219	0	0	0	0	0	0	0	0
IGHV3-69-1	P	IGHD3-10	F	IGHJ4	F	IGHG1	F	CARCPFYYGSGSYYPFDHW	in-frame	219	0	0	0	0	0	0	0	0	219	0
IGHV3-43	F	IGHD6-13	F	IGHJ6	F	IGHG1	F	CAKSGYGQQLVTGYYGMDVW	in-frame	219	219	0	0	0	0	0	0	0	0	0
IGHV3-15	F	x	x	IGHJ5,IGHJ4	F	IGHG2	F	CTTELGRWFV**W	out-of-frame	219	0	219	0	0	0	0	0	0	0	0
IGHV4-39	F	IGHD6-13	F	IGHJ3	F	IGHG2	F	CARHALIAAAGKMAAQFDIW	in-frame	218	0	0	0	0	0	0	218	0	0	0
IGHV3-30	F	IGHD2-21	F	IGHJ3	F	IGHG2	F	CARCGGDCHLSTSAFDVW	in-frame	218	0	0	0	0	0	0	218	0	0	0
IGHV1-69D	F	IGHD2-2	F	IGHJ4	F	IGHG2	F	CARGYCSSTSCPARGGAFDYW	in-frame	218	0	218	0	0	0	0	0	0	0	0
IGHV1-18	F	x	x	IGHJ4	F	IGHG1	F	CARLVPAGSTAYFDYW	in-frame	218	0	0	0	0	0	0	0	0	218	0
IGHV1-18	F	x	x	IGHJ4	F	IGHG1	F	CARGQYFDYW	in-frame	218	0	0	0	0	0	0	0	218	0	0
IGHV5-51	F	x	x	IGHJ4	F	IGHG2	F	CVTPPNW	in-frame	217	0	0	0	0	0	0	217	0	0	0
IGHV3-7,IGHV3-69-1,IGHV3-48	F	x	x	IGHJ4	F	IGHG2	F	CLAGYSSSGAYW	in-frame	217	217	0	0	0	0	0	0	0	0	0
IGHV3-7	F	IGHD3-10	F	IGHJ4	F	IGHG1	F	CARCPYYYGSGSYYPFDYW	in-frame	217	0	0	0	0	0	0	0	0	217	0
IGHV3-49	F	x	x	IGHJ6	F	IGHG1	F	CSVVGWTSNRYYAMDVW	in-frame	217	0	0	0	0	0	0	0	217	0	0
IGHV3-49	F	IGHD3-10	F	IGHJ5	F	IGHG4	F	CARDSLVRGVIYGANWFDPW	in-frame	217	0	0	0	0	0	0	0	0	217	0
IGHV3-23D	F	x	x	IGHJ4	F	IGHG2	F	CAKVEEQSGLITSFVDYW	in-frame	217	0	0	0	217	0	0	0	0	0	0
IGHV3-23D	F	x	x	IGHJ1	F	IGHG2	F	CAKDSTPPNTIGWYPQYFQYW	in-frame	217	0	0	0	0	0	0	0	217	0	0
IGHV2-5	F	IGHD3-9	F	IGHJ4	F	IGHG2	F	CARTGGDILTSPDFYFDSW	in-frame	217	0	0	0	0	0	0	0	217	0	0
IGHV7-4-1	F	IGHD6-6	F	IGHJ5	F	IGHG2	F	CARPWSSSSSVGWFDPW	in-frame	216	0	0	0	0	0	0	0	0	216	0
IGHV4-61	F	IGHD1-26	F	IGHJ6	F	IGHG1	F	CARSPAGEPVRKPNSGIYPPPKNYFGIDVW	in-frame	216	216	0	0	0	0	0	0	0	0	0
IGHV3-23D	F	x	x	IGHJ4	F	IGHG1	F	CAKDIRSAYW	in-frame	216	0	0	0	0	0	0	0	216	0	0
IGHV3-23D	F	IGHD2-2	F	IGHJ5	F	IGHG1	F	CAKVAYCSSNTCPIGGWFDPW	in-frame	216	0	0	0	0	0	0	0	0	216	0
IGHV2-26	F	IGHD3-10	F	IGHJ6	F	IGHG2	F	CARTRGSIGELLWFGDLFDYGMDVW	in-frame	216	0	0	0	0	0	216	0	0	0	0
IGHV1-46	F	x	x	IGHJ3	F	IGHG1	F	CARVILRVRGPNAFDIW	in-frame	216	0	216	0	0	0	0	0	0	0	0
IGHV4/OR15-8	ORF	x	x	IGHJ3	F	IGHG1	F	CARDQSGEPPARVAFEIW	in-frame	215	0	0	0	0	0	0	0	215	0	0
IGHV3-9	F	x	x	IGHJ4	F	IGHG2	F	CAKDLGQRGLRFVGDFW	in-frame	215	0	0	0	0	0	0	215	0	0	0
IGHV3-7,IGHV3-69-1,IGHV3-48	F	x	x	IGHJ4	F	IGHG4	F	CTRGIGPGLVRGVYFDNW	in-frame	215	0	0	0	0	0	215	0	0	0	0
IGHV3-48	F	x	x	IGHJ4	F	IGHG2	F	CTRDISAWHGSFDSW	in-frame	215	0	0	0	0	0	215	0	0	0	0
IGHV3-23D	F	x	x	IGHJ5	F	IGHG2	F	CAKATVRVTVGLDPW	in-frame	215	0	0	0	215	0	0	0	0	0	0
IGHV3-23D	F	x	x	IGHJ4	F	IGHG1	F	CATEEFDYW	in-frame	215	0	0	0	0	0	0	0	0	215	0
IGHV1-3	F	x	x	IGHJ5	F	IGHG2	F	CAKDNYKDGGNWFGPW	in-frame	215	0	0	0	0	0	0	0	215	0	0
IGHV1-3	F	x	x	IGHJ4	F	IGHG2	F	CARELGVEKTNFDYW	in-frame	215	0	0	0	0	0	0	215	0	0	0
IGHV1-24	F	IGHD3-10	F	IGHJ4	F	IGHG1	F	CATGWITMVRGVMEGSDYW	in-frame	215	0	0	0	0	0	0	0	0	215	0
IGHV4-61	F	IGHD6-13	F	IGHJ4	F	IGHG1	F	CARNVAAAGFPFDYW	in-frame	214	0	0	0	0	0	0	0	0	214	0
IGHV3-74	F	x	x	IGHJ4	F	IGHG2	F	CVRVVYGSGNSLEYW	in-frame	214	0	0	0	0	0	214	0	0	0	0
IGHV3-69-1	P	x	x	IGHJ5,IGHJ4	F	IGHG3	F	CASGLPPAHW	in-frame	214	0	0	0	214	0	0	0	0	0	0
IGHV6-1	F	x	x	IGHJ6	F	IGHG1	F	CAREGVVEVVAVDEVVDGMDVW	in-frame	213	0	0	0	0	0	0	213	0	0	0
IGHV4-59	F	x	x	IGHJ4	F	IGHG1	F	CARMIWGANDFW	in-frame	213	0	0	213	0	0	0	0	0	0	0
IGHV4-39	F	x	x	IGHJ4	F	IGHG2	F	CARINGPRCTRNSCPSPFDFW	in-frame	213	0	0	0	0	0	0	0	0	213	0
IGHV3-9	F	x	x	IGHJ6	F	IGHG4	F	CARRPLYYGMDVW	in-frame	213	0	0	0	213	0	0	0	0	0	0
IGHV3-9	F	x	x	IGHJ6	F	IGHG2	F	CTTDLTPGGADVW	in-frame	213	0	0	0	0	0	213	0	0	0	0
IGHV3-23D	F	x	x	IGHJ4	F	IGHG2	F	CVKDGLGSAIYYPDYW	in-frame	213	0	0	0	213	0	0	0	0	0	0
IGHV3-23D	F	IGHD2-2	F	IGHJ4	F	IGHG2	F	CAKGPPGYCTSTYCYTGDYW	in-frame	213	0	0	0	0	0	0	0	213	0	0
IGHV3-21	F	x	x	IGHJ6	F	IGHG1	F	CARVSGLYGMDAW	in-frame	213	0	0	0	0	0	0	213	0	0	0
IGHV3-NL1	F	IGHD5-12	F	IGHJ5	F	IGHG2	F	CAKSRDQSGGYDFIIHSW	in-frame	212	0	0	0	0	212	0	0	0	0	0
IGHV3-9	F	IGHD4-17	F	IGHJ4	F	IGHG1	F	CAKTFDYGDYFDYW	in-frame	212	0	0	212	0	0	0	0	0	0	0
IGHV3-66	F	x	x	IGHJ5	F	IGHG3	F	CVRGHYYGLQSRFDAW	in-frame	212	0	212	0	0	0	0	0	0	0	0
IGHV3-33,IGHV3-53	F	IGHD2-2	F	IGHJ6	F	IGHG1	F	CVRDRLPHYCSSTSCYGVMDVW	in-frame	212	0	0	0	0	0	0	212	0	0	0
IGHV4-59,IGHV4-4,IGHV4-39	F	x	x	IGHJ4	F	IGHG2	F	CANLPYPRGRPLAYW	in-frame	211	0	0	0	0	0	0	0	0	211	0
IGHV3-9	F	IGHD1-26	F	IGHJ4	F	IGHG1	F	CAKDHSGSFNTFLFASW	in-frame	211	0	0	211	0	0	0	0	0	0	0
IGHV3-7	F	x	x	IGHJ5	F	IGHG2	F	CGLWNYSRFDSW	in-frame	211	0	211	0	0	0	0	0	0	0	0
IGHV3-43	F	x	x	IGHJ6	F	IGHG1	F	CAKDSTVNLGYRDYYHYGMDVW	in-frame	211	0	0	0	0	0	0	0	211	0	0
IGHV3-21	F	x	x	IGHJ3	F	IGHG1	F	CATVRYMDAFDIW	in-frame	211	0	0	0	0	0	0	0	0	211	0
IGHV3-49	F	x	x	IGHJ5	F	IGHG2	F	CTRGVPRSGSYGWDSW	in-frame	210	0	0	0	0	210	0	0	0	0	0
IGHV3-49	F	IGHD1-26	F	IGHJ4	F	IGHG2	F	CTRVDSGSYHEYYFDFW	in-frame	210	0	0	0	0	0	0	0	0	210	0
IGHV3-72	F	IGHD1-26	F	IGHJ4	F	IGHG2	F	CGRSLGATIDYW	in-frame	209	0	0	0	0	0	0	0	209	0	0
IGHV3-7	F	IGHD4-17	F	IGHJ4	F	IGHG1	F	CARFQYGDYEDVPHFDYW	in-frame	209	0	209	0	0	0	0	0	0	0	0
IGHV3-33	F	x	x	IGHJ3	F	IGHG2	F	CARRGAYCSGGNCYSVNSYDLW	in-frame	209	0	0	0	0	0	0	209	0	0	0
IGHV3-23D	F	x	x	IGHJ4	F	IGHG1	F	CAKDLYLADLVGDFDYW	in-frame	209	0	0	209	0	0	0	0	0	0	0
IGHV2-5	F	IGHD1-26	F	IGHJ4	F	IGHG1	F	CAHRPMVGAYYLDYW	in-frame	209	0	0	0	0	0	0	0	0	209	0
IGHV1-3	F	x	x	IGHJ6	F	IGHG1	F	CAGSAGLVGATGGRYYYYYGMDVW	in-frame	209	0	209	0	0	0	0	0	0	0	0
IGHV7-4-1	F	x	x	IGHJ4	F	IGHG2	F	CAKARRSCRSSTDCQIDDFDYW	in-frame	208	0	0	0	0	0	0	0	0	208	0
IGHV3-74	F	x	x	IGHJ4	F	IGHG2	F	CARGGSGNFDQW	in-frame	208	0	0	0	208	0	0	0	0	0	0
IGHV3-23D,IGHV3-23	F	IGHD3-10	F	IGHJ4	F	IGHG2	F	CAKSDGSGSYDDFW	in-frame	208	0	0	0	0	0	0	0	0	208	0
IGHV3-23D	F	x	x	IGHJ4	F	IGHG2	F	CAKFEGPYSNNWFYDYW	in-frame	208	0	0	0	0	0	0	0	0	208	0
IGHV3-23D	F	x	x	IGHJ4	F	IGHG2	F	CAKDLVGGSGFFDYW	in-frame	208	0	0	0	0	0	0	0	0	208	0
IGHV3-23D	F	IGHD3-10	F	IGHJ4	F	IGHG2	F	CAKDGLGSGTYYPDYW	in-frame	208	0	0	0	208	0	0	0	0	0	0
IGHV3-23	F	x	x	IGHJ2	F	IGHG2	F	CAKGRGHDPRKWHFDLW	in-frame	208	0	0	0	0	0	0	0	208	0	0
IGHV2-5	F	IGHD3-10	F	IGHJ3	F	IGHG2	F	CAQSQWISGTYPKNDAFDIW	in-frame	208	0	0	0	208	0	0	0	0	0	0
IGHV7-4-1	F	x	x	IGHJ4	F	IGHG2	F	CARARFSDYRGVSGPVPLDYW	in-frame	207	0	0	0	0	0	0	0	0	207	0
IGHV5-51	F	x	x	IGHJ4	F	IGHG2	F	CTRRGFGDLRDFW	in-frame	207	0	0	0	207	0	0	0	0	0	0
IGHV4-34,IGHV4-31	F	IGHD3-10	F	IGHJ4	F	IGHG2	F	CTSWKDYYGFQKDYW	in-frame	207	0	0	0	0	0	0	207	0	0	0
IGHV3-7,IGHV3-69-1,IGHV3-48,IGHV3-21	F	x	x	IGHJ2	F	IGHG2	F	CAREGGRGHSSREYFDLW	in-frame	207	0	0	0	207	0	0	0	0	0	0
IGHV3-66	F	IGHD5-5,IGHD5-18	F	IGHJ5	F	IGHG1	F	CARRRYSYGYGWEQNWLDPW	in-frame	207	0	0	0	0	0	207	0	0	0	0
IGHV3-49	F	x	x	IGHJ4	F	IGHG2	F	CTKYGGFPDYW	in-frame	207	0	0	0	0	0	0	207	0	0	0
IGHV3-13	F	x	x	IGHJ3	F	IGHG1	F	CARSGKPSPWASRKYDAFDIW	in-frame	207	0	0	0	0	0	0	0	0	207	0
IGHV4-59,IGHV4-34,IGHV4-31	F	x	x	IGHJ5	F	IGHG3	F	CAQLRHDYGYFSPSPW	in-frame	206	0	0	0	0	0	0	206	0	0	0
IGHV4-39	F	x	x	IGHJ5,IGHJ4	F	IGHG1	F	CARQDVAVALSNQW	in-frame	206	0	0	0	0	0	0	0	0	206	0
IGHV3-9	F	x	x	IGHJ6	F	IGHG2	F	CSKVIYQGSDSYLFYGLDVW	in-frame	206	0	0	0	0	0	0	0	0	206	0
IGHV3-71	P	x	x	IGHJ2	F	IGHG1	F	CARDPPYTWDGGRVGYFDLW	in-frame	206	0	0	0	0	0	0	206	0	0	0
IGHV3-66,IGHV3-30-3,IGHV3-30	F	IGHD3-10	F	IGHJ5	F	IGHG1	F	CARDRRLLWFGGDSW	in-frame	206	0	206	0	0	0	0	0	0	0	0
IGHV3-23D	F	x	x	IGHJ3	F	IGHG1	F	CAKDLEPDAFDIW	in-frame	206	0	0	0	0	0	206	0	0	0	0
IGHV2-70D,IGHV2-70	F	x	x	IGHJ5	F	IGHG1	F	CARMGFTSCYGEVWFDPW	in-frame	206	0	0	206	0	0	0	0	0	0	0
IGHV1-18,IGHV1-46	F	x	x	IGHJ6	F	IGHG1	F	CARDSPPGGRLLQWLDHRPDKYYYNMDIW	in-frame	206	0	0	0	0	0	0	0	0	206	0
IGHV4-39	F	IGHD4-17	F	IGHJ6	F	IGHG1	F	CARQYGDYEDYYYYMDVW	in-frame	205	0	0	0	0	0	0	0	0	205	0
IGHV4-34,IGHV4-31	F	x	x	IGHJ4	F	IGHG2	F	CARGLGLGRPYYFDSW	in-frame	205	0	0	0	0	205	0	0	0	0	0
IGHV3-9	F	IGHD6-19	F	IGHJ4	F	IGHG1	F	CAKDAQYLAVAGNFDYW	in-frame	205	0	0	205	0	0	0	0	0	0	0
IGHV2-26	F	IGHD3-9	F	IGHJ5	F	IGHG1	F	CARIEAYYDILTGYYFSQTNWFDPW	in-frame	205	0	0	0	0	0	0	0	205	0	0
IGHV1-18	F	IGHD6-19	F	IGHJ3	F	IGHG1	F	CARDRLGISVAGPGSSNAFDFW	in-frame	205	0	0	0	0	0	0	0	205	0	0
IGHV4-61,IGHV4-59	F	IGHD3-22	F	IGHJ5	F	IGHG2	F	CARDSSGYGWFDPW	in-frame	204	0	0	0	0	0	0	0	0	204	0
IGHV4-61	F	x	x	IGHJ5	F	IGHG4	F	CARSWALAGTRWFDTW	in-frame	204	0	0	0	0	0	0	204	0	0	0
IGHV4-39	F	x	x	IGHJ6	F	IGHG1	F	CATGVDVLGHFYYYMDVW	in-frame	204	0	0	0	0	0	0	0	0	204	0
IGHV3-53	F	x	x	IGHJ2	F	IGHG1	F	CARGVSRYFDLW	in-frame	204	0	0	0	0	0	0	204	0	0	0
IGHV3-23D	F	x	x	IGHJ4	F	IGHG1	F	CTKVAQATVREGFDYW	in-frame	204	0	0	0	0	0	0	0	204	0	0
IGHV3-23D	F	IGHD3-10	F	IGHJ4	F	IGHG2	F	CAKDGERDYYGSGSYYNSHW	in-frame	204	0	204	0	0	0	0	0	0	0	0
IGHV3-20	ORF	x	x	IGHJ4	F	IGHG2	F	CARGGPYFSPTAQFYFDFW	in-frame	204	0	0	0	0	0	0	0	0	204	0
IGHV3-15	F	x	x	IGHJ4	F	IGHG2	F	CTTLTSENFHKDYW	in-frame	204	0	0	0	0	0	204	0	0	0	0
IGHV3-15	F	x	x	IGHJ4	F	IGHG2	F	CATGTGRSGPGDHFDYW	in-frame	204	0	0	0	0	204	0	0	0	0	0
IGHV7-4-1	F	x	x	IGHJ5	F	IGHG2	F	CARRPSISSALANW	in-frame	203	0	0	0	0	0	0	0	203	0	0
IGHV3-23D	F	x	x	IGHJ4	F	IGHG2	F	CAKGSPYDTGWSAFFDSW	in-frame	203	0	0	0	203	0	0	0	0	0	0
IGHV3-23D	F	x	x	IGHJ4	F	IGHG2	F	CAKCRQSYGDDSFDYW	in-frame	203	0	0	0	0	203	0	0	0	0	0
IGHV4/OR15-8	ORF	IGHD1-26	F	IGHJ5	F	IGHG1	F	CARFRRVGATAW	in-frame	202	0	0	0	0	0	0	0	0	202	0
IGHV4-39	F	x	x	IGHJ4	F	IGHG1	F	CARHSLGGPTTHGFMYYFDSW	in-frame	202	202	0	0	0	0	0	0	0	0	0
IGHV3-7	F	x	x	IGHJ4	F	IGHG2	F	CGLWTYSRFDYW	in-frame	202	0	202	0	0	0	0	0	0	0	0
IGHV3-48	F	x	x	IGHJ4	F	IGHG1	F	CARDPHPGVPYFDYW	in-frame	202	0	202	0	0	0	0	0	0	0	0
IGHV3-23D	F	x	x	IGHJ4	F	IGHG4	F	CAKSTHALGDLSHFDYW	in-frame	202	0	0	0	0	0	0	0	0	0	202
IGHV3-23D	F	x	x	IGHJ4	F	IGHG2	F	CAKQNGWDLSHYYFDYW	in-frame	202	0	0	0	0	0	0	0	0	202	0
IGHV1-8	F	x	x	IGHJ5	F	IGHG1	F	CARASKDIRKYWFDPW	in-frame	202	0	0	0	0	0	0	0	0	202	0
IGHV1-69D	F	x	x	IGHJ4	F	IGHG1	F	CAKTILTGFYKAAFDSW	in-frame	202	0	0	0	0	0	0	202	0	0	0
IGHV7-4-1	F	x	x	IGHJ5	F	IGHG1	F	CARVIWQNSVSSFDPW	in-frame	201	0	201	0	0	0	0	0	0	0	0
IGHV4-34	F	x	x	IGHJ2	F	IGHG2	F	CARRVDSYKSSTYYRPRNWYFDLW	in-frame	201	0	0	0	0	0	201	0	0	0	0
IGHV3-9	F	x	x	IGHJ4	F	IGHG2	F	CAKDVSVTRENYFDSW	in-frame	201	0	0	0	0	0	0	0	0	201	0
IGHV3-53	F	x	x	IGHJ4	F	IGHG2	F	CAREEEEAQNIDYW	in-frame	201	0	0	0	0	0	0	201	0	0	0
IGHV3-33,IGHV3-30	F	x	x	IGHJ2	F	IGHG2	F	CARARAGWSLDLW	in-frame	201	0	0	201	0	0	0	0	0	0	0
IGHV3-23D	F	x	x	IGHJ4	F	IGHG2	F	CTKSPGFESGGRTDW	in-frame	201	0	0	0	0	0	201	0	0	0	0
IGHV3-11	F	x	x	IGHJ4	F	IGHG1	F	CAREATFASATYTIPDNW	in-frame	201	0	0	0	0	0	0	201	0	0	0
IGHV5-51	F	x	x	IGHJ4	F	IGHG1	F	CARPLRHVAMGLNFDYW	in-frame	200	200	0	0	0	0	0	0	0	0	0
IGHV3-74	F	x	x	IGHJ5	F	IGHG4	F	CARDASPYSATNWFDPW	in-frame	200	0	0	0	0	0	200	0	0	0	0
IGHV3-74	F	x	x	IGHJ3	F	IGHG1	F	CVRDYPSTRGGAFDVW	in-frame	200	0	0	0	0	0	0	0	200	0	0
IGHV3-66,IGHV3-53	F	x	x	IGHJ3	F	IGHG1	F	CARHRGSGEYNNVPDIFYIW	in-frame	200	0	0	0	0	0	0	0	0	200	0
IGHV3-53	F	IGHD4-23	ORF	IGHJ1	F	IGHG1	F	CARDYGGNWGAGGDFQYW	in-frame	200	0	0	0	0	0	0	0	0	200	0
IGHV3-15	F	x	x	IGHJ3	F	IGHG2	F	CMVLGLSPTSSGDEAFDIW	in-frame	200	0	0	0	0	0	200	0	0	0	0
IGHV4-61,IGHV4-59	F	x	x	IGHJ4	F	IGHG1	F	CARVLEDGFCFDNW	in-frame	199	0	0	0	0	0	0	0	0	199	0
IGHV4-39	F	IGHD3-10	F	IGHJ5	F	IGHG1	F	CARQRTMVRGVRNHWFDPW	in-frame	199	0	0	0	0	0	0	199	0	0	0
IGHV4-30-2	F	x	x	IGHJ4	F	IGHG2	F	CARLPPASYFLDYW	in-frame	199	0	0	0	0	199	0	0	0	0	0
IGHV3-23D	F	x	x	IGHJ4	F	IGHG2	F	CAKDSGSRGFDYW	in-frame	199	0	0	0	0	0	0	0	199	0	0
IGHV3-15	F	x	x	IGHJ5,IGHJ4	F	IGHG1	F	CATNIVVLPAAAPGW	in-frame	199	0	0	0	0	0	0	0	0	199	0
IGHV3-15	F	x	x	IGHJ4	F	IGHG2	F	CAADEGQIEYW	in-frame	199	0	0	0	0	0	0	0	199	0	0
IGHV2-70D,IGHV2-70	F	x	x	IGHJ4	F	IGHG1	F	CARIRSSHETSSWNFPPFDYW	in-frame	199	0	0	199	0	0	0	0	0	0	0
IGHV2-70,IGHV2-5	F	IGHD3-22	F	IGHJ4	F	IGHG1	F	CAHTLRTYYYDPDGSLGYYFDEW	in-frame	199	0	0	0	0	0	0	0	0	199	0
IGHV1-69D	F	x	x	IGHJ3	F	IGHG1	F	CARDFRPPRRAFDIW	in-frame	199	0	0	0	0	0	0	0	199	0	0
IGHV1-18	F	IGHD6-13	F	IGHJ4	F	IGHG2	F	CAKDAYSSWYFDEW	in-frame	199	0	0	0	0	199	0	0	0	0	0
IGHV4-61	F	x	x	IGHJ6	F	IGHG1	F	CARDFGILTYNYGVDVW	in-frame	198	0	0	0	198	0	0	0	0	0	0
IGHV3-9	F	x	x	IGHJ6	F	IGHG1	F	CTRDRVHGHEFYYHYGLDVW	in-frame	198	0	0	0	0	0	0	0	198	0	0
IGHV3-74	F	x	x	IGHJ4	F	IGHG2	F	CVRDRDWVLFDYW	in-frame	198	0	0	0	0	0	198	0	0	0	0
IGHV3-74	F	IGHD3-10	F	IGHJ4	F	IGHG1	F	CARDGSYGSGSYEADYW	in-frame	198	0	0	0	0	0	0	0	198	0	0
IGHV3-7	F	IGHD3-3	F	IGHJ4	F	IGHG1	F	CARVDVEIYYDFWSGYYLDYW	in-frame	198	198	0	0	0	0	0	0	0	0	0
IGHV3-33	F	x	x	IGHJ2	F	IGHG2	F	CAKARADWSLDVW	in-frame	198	0	0	198	0	0	0	0	0	0	0
IGHV3-33	F	IGHD3-10	F	IGHJ4	F	IGHG2	F	CAKSDASGSYDDFW	in-frame	198	0	0	0	0	0	0	0	0	198	0
IGHV3-15	F	x	x	IGHJ5	F	IGHG2	F	CTTCNWKSPWDPW	in-frame	198	0	0	0	0	198	0	0	0	0	0
IGHV3-15	F	x	x	IGHJ4	F	IGHG1	F	CTTEFLPGFPPFGNW	in-frame	198	0	0	198	0	0	0	0	0	0	0
IGHV1-69D	F	x	x	IGHJ6	F	IGHG2	F	CARGRTDNWKYEDYYYDMVVW	in-frame	198	0	0	0	0	0	0	0	198	0	0
IGHV5-51	F	IGHD3-10	F	IGHJ4	F	IGHG2	F	CARRVNMVRGVTYPYFDYW	in-frame	197	0	197	0	0	0	0	0	0	0	0
IGHV4-61,IGHV4-59	F	IGHD4-17	F	IGHJ2	F	IGHG2	F	CARVENGDYGDWYFDLW	in-frame	197	0	0	0	0	0	0	0	197	0	0
IGHV4-4	F	x	x	IGHJ4	F	IGHG1	F	CARGPSYTPVVIRPRYFDSW	in-frame	197	0	0	0	0	0	0	197	0	0	0
IGHV4-34,IGHV4-31	F	x	x	IGHJ4	F	IGHG1	F	CARGPPNLGAVYFDYW	in-frame	197	0	0	0	0	0	197	0	0	0	0
IGHV3-33	F	x	x	IGHJ4	F	IGHG2	F	CAKDLSHHYSPDSW	in-frame	197	0	0	0	0	0	0	197	0	0	0
IGHV3-23D	F	IGHD3-10	F	IGHJ4	F	IGHG1	F	CAKDDGAMVRGVIRSVGYFDYW	in-frame	197	0	197	0	0	0	0	0	0	0	0
IGHV3-15	F	IGHD3-3	F	IGHJ4	F	IGHG2	F	CATPNSLTTLGVVILGSAFDYW	in-frame	197	0	0	0	0	0	0	0	197	0	0
IGHV1-3	F	x	x	IGHJ6	F	IGHG2	F	CTRVQVDEYGQPYFYNGMDFW	in-frame	197	0	0	0	0	0	0	197	0	0	0
IGHV1-18	F	x	x	IGHJ2	F	IGHG2	F	CARDRGAGSTYSYPHWHFDLW	in-frame	197	0	0	0	0	197	0	0	0	0	0
IGHV4-61,IGHV4-59	F	x	x	IGHJ5	F	IGHG1	F	CATVRSAYENWFDPW	in-frame	196	0	0	0	0	0	0	196	0	0	0
IGHV3-9	F	IGHD3-22	F	IGHJ4	F	IGHG2	F	CAKSHYYDSRGYYDYW	in-frame	196	0	0	196	0	0	0	0	0	0	0
IGHV3-69-1,IGHV3-48	P	x	x	IGHJ5	F	IGHG2	F	CARDPPDTDRPTWVDFW	in-frame	196	0	0	0	196	0	0	0	0	0	0
IGHV3-69-1	P	x	x	IGHJ5	F	IGHG3	F	CARDPLDTDKPTWVDYW	in-frame	196	0	0	0	196	0	0	0	0	0	0
IGHV3-49	F	x	x	IGHJ4	F	IGHG2	F	CSRGRTVDGAKYYSDHW	in-frame	196	0	0	0	0	0	0	0	0	196	0
IGHV3-33	F	IGHD3-9	F	IGHJ6	F	IGHG1	F	CAKVLRHFDWLFFLATTSVWT**W	out-of-frame	196	0	0	0	0	0	196	0	0	0	0
IGHV3-23D,IGHV3-23	F	x	x	IGHJ4	F	IGHG2	F	CAKAGGVAMGWARFDHW	in-frame	196	0	196	0	0	0	0	0	0	0	0
IGHV3-23D	F	x	x	IGHJ4	F	IGHG2	F	CAKHEGWLQQNYCFDYW	in-frame	196	0	0	0	196	0	0	0	0	0	0
IGHV3-15	F	x	x	IGHJ5,IGHJ4	F	IGHG1	F	CTAIVGGYDVWDHW	in-frame	196	0	0	0	0	0	196	0	0	0	0
IGHV3-15	F	x	x	IGHJ4	F	IGHG2	F	CATGTGRSGPGDYLDYW	in-frame	196	0	0	0	0	196	0	0	0	0	0
IGHV3-15	F	x	x	IGHJ1	F	IGHG1	F	CTSYSTTNWYVFQHW	in-frame	196	196	0	0	0	0	0	0	0	0	0
IGHV3-15	F	IGHD2-2	F	IGHJ4	F	IGHG2	F	CTTSPLYCSTTSCYLSRTYW	in-frame	196	0	0	0	0	0	196	0	0	0	0
IGHV2-70D,IGHV2-70	F	IGHD3-22	F	IGHJ4	F	IGHG1	F	CARMRDAYYPDSTGHYYFDQW	in-frame	196	0	0	0	0	0	196	0	0	0	0
IGHV1-69D	F	x	x	IGHJ4	F	IGHG1	F	CARDYGAPHSLDYW	in-frame	196	0	0	0	0	0	0	0	196	0	0
IGHV1-69D	F	IGHD4-17	F	IGHJ6	F	IGHG1	F	CSREVAFYGDYTYYYGMDVW	in-frame	196	0	0	0	0	0	0	0	196	0	0
IGHV3-74	F	x	x	IGHJ4	F	IGHG1	F	CAKGTRGTVDSW	in-frame	195	0	0	0	0	0	0	195	0	0	0
IGHV3-69-1,IGHV3-48	P	x	x	IGHJ5	F	IGHG2	F	CARDRSGSSRGWLDPW	in-frame	195	0	0	0	0	0	0	0	0	0	195
IGHV3-23D	F	IGHD3-10	F	IGHJ5	F	IGHG1	F	CAKCPAVIMIRGVIKCDWFDPW	in-frame	195	0	0	0	0	195	0	0	0	0	0
IGHV3-15	F	IGHD5-12	F	IGHJ4	F	IGHG2	F	CSTRLTGYDWVDYW	in-frame	195	0	195	0	0	0	0	0	0	0	0
IGHV3-13	F	x	x	IGHJ5	F	IGHG3	F	CTKVRHLEGYLRLWFDSW	in-frame	195	0	0	0	0	0	195	0	0	0	0
IGHV2-5	F	x	x	IGHJ2	F	IGHG1	F	CVQGSWYFDIW	in-frame	195	0	0	0	195	0	0	0	0	0	0
IGHV5-51	F	x	x	IGHJ4	F	IGHG1	F	CARFRNFFDPIDYW	in-frame	194	0	194	0	0	0	0	0	0	0	0
IGHV3-9	F	x	x	IGHJ4	F	IGHG2	F	CSADTAGDLEFW	in-frame	194	0	0	0	0	0	0	0	0	194	0
IGHV3-74	F	x	x	IGHJ4	F	IGHG2	F	CTTYTSSAYW	in-frame	194	0	0	0	0	0	0	0	194	0	0
IGHV3-74	F	x	x	IGHJ4	F	IGHG2	F	CARVLPQHGSGWFPDKW	in-frame	194	0	0	0	0	0	194	0	0	0	0
IGHV3-7,IGHV3-69-1,IGHV3-48	F	x	x	IGHJ3	F	IGHG2	F	CAREGFRPRLSSDDAFDVW	in-frame	194	0	0	0	194	0	0	0	0	0	0
IGHV3-23D	F	x	x	IGHJ3	F	IGHG1	F	CASRRCYISNCFARSLDAFDFW	in-frame	194	0	0	0	0	0	0	0	0	194	0
IGHV3-23D	F	x	x	IGHJ3	F	IGHG1	F	CAKNSHWLTLRDAFDVW	in-frame	194	0	0	0	0	0	0	0	194	0	0
IGHV3-23D	F	IGHD5-12	F	IGHJ4	F	IGHG1	F	CAKPPGYSGYDAKNYFDYW	in-frame	194	194	0	0	0	0	0	0	0	0	0
IGHV1-18	F	x	x	IGHJ5,IGHJ4	F	IGHG1	F	CARDGETYYPGDHW	in-frame	194	0	0	0	0	0	0	0	194	0	0
IGHV7-4-1	F	x	x	IGHJ3	F	IGHG2	F	CARETGAWDFDAFDVW	in-frame	193	0	0	0	0	0	0	193	0	0	0
IGHV4-61,IGHV4-59	F	x	x	IGHJ4	F	IGHG2	F	CARDPFGQVSFDSW	in-frame	193	0	193	0	0	0	0	0	0	0	0
IGHV4-39	F	IGHD3-10	F	IGHJ6	F	IGHG1	F	CARDSHYYDSGYYHYGMDVW	in-frame	193	0	0	0	0	0	193	0	0	0	0
IGHV3-74	F	x	x	IGHJ4	F	IGHG2	F	CTTVYEFW	in-frame	193	0	0	0	193	0	0	0	0	0	0
IGHV3-23D	F	x	x	IGHJ4	F	IGHG2	F	CAKRGGSGVYYFDYW	in-frame	193	0	0	0	0	0	0	193	0	0	0
IGHV3-15	F	x	x	IGHJ5,IGHJ4	F	IGHG1	F	CVTVPSPPPYFDGNRLW	in-frame	193	0	0	0	0	0	0	193	0	0	0
IGHV4-34,IGHV4-31	F	x	x	IGHJ5	F	IGHG1	F	CARGIGLYFGQPNNWFDPW	in-frame	192	0	0	0	0	0	0	0	0	192	0
IGHV4-34,IGHV4-31	F	x	x	IGHJ4	F	IGHG2	F	CANWRDYYGLGKDYW	in-frame	192	0	0	0	0	0	0	192	0	0	0
IGHV3-48	F	x	x	IGHJ2	F	IGHG2	F	CARDRGSGYSNWYFDLW	in-frame	192	0	0	0	0	0	0	192	0	0	0
IGHV3-23D	F	x	x	IGHJ6	F	IGHG2	F	CAKVAAVSRSFWGDSGLDVW	in-frame	192	192	0	0	0	0	0	0	0	0	0
IGHV3-15	F	IGHD3-22	F	IGHJ4	F	IGHG2	F	CTALWYYTESSGHW	in-frame	192	0	192	0	0	0	0	0	0	0	0
IGHV3-13	F	x	x	IGHJ2	F	IGHG1	F	CARVTGIGGSYGGLDLW	in-frame	192	0	0	0	0	0	0	192	0	0	0
IGHV4-61,IGHV4-39,IGHV4-34	F	IGHD3-10	F	IGHJ4	F	IGHG4	F	CARVGFLVRGVVDSW	in-frame	191	0	0	0	0	0	0	0	0	191	0
IGHV3-74	F	x	x	IGHJ4	F	IGHG2	F	CTKDIPTGWFVDIW	in-frame	191	0	0	0	0	0	191	0	0	0	0
IGHV3-7,IGHV3-69-1,IGHV3-48	F	x	x	IGHJ6	F	IGHG1	F	CARVAVWERSGGSNSFMDVW	in-frame	191	0	0	0	0	0	0	191	0	0	0
IGHV3-7,IGHV3-69-1,IGHV3-48	F	x	x	IGHJ4	F	IGHG1	F	CARPAVEMAIGGVEFDYW	in-frame	191	0	191	0	0	0	0	0	0	0	0
IGHV3-49	F	IGHD3-10	F	IGHJ4	F	IGHG3	F	CSRGSPVTMVRGGQTDYW	in-frame	191	0	191	0	0	0	0	0	0	0	0
IGHV3-23D	F	x	x	IGHJ4	F	IGHG2	F	CAKRSSIAPTGAHFDSW	in-frame	191	0	0	0	0	0	0	0	191	0	0
IGHV3-23D	F	IGHD3-16	F	IGHJ4	F	IGHG4	F	CAKDKIRLGDLSDSDHW	in-frame	191	0	0	0	0	0	0	0	0	0	191
IGHV3-23D	F	IGHD2-2	F	IGHJ3	F	IGHG1	F	CAKDVGGVIPAAITDAFDIW	in-frame	191	0	0	0	0	0	0	0	0	191	0
IGHV3-21	F	x	x	IGHJ5,IGHJ4	F	IGHG1	F	CAALEGVW	in-frame	191	0	0	0	0	0	0	0	191	0	0
IGHV2-5	F	x	x	IGHJ3	F	IGHG2	F	CAHKRGGDAFDMW	in-frame	191	0	0	0	0	191	0	0	0	0	0
IGHV2-5	F	IGHD5-5,IGHD5-18	F	IGHJ4	F	IGHG1	F	CAHASSRGYSYGWPFEYW	in-frame	191	0	0	0	0	191	0	0	0	0	0
IGHV1-18	F	x	x	IGHJ6	F	IGHG1	F	CARAHIVLMLYAQNYMDVW	in-frame	191	0	0	0	0	0	0	0	191	0	0
IGHV4-59	F	x	x	IGHJ6	F	IGHG1	F	CARLLLVHDDDGVAVDYGMDVW	in-frame	190	0	0	0	0	0	190	0	0	0	0
IGHV3-72	F	x	x	IGHJ4	F	IGHG2	F	CARHFDTSTSYW	in-frame	190	0	0	0	0	0	0	0	0	190	0
IGHV3-72	F	IGHD1/OR15-1b,IGHD1/OR15-1a,IGHD1-7,IGHD1-20	ORF	IGHJ4	F	IGHG2	F	CITGVRFDYW	in-frame	190	190	0	0	0	0	0	0	0	0	0
IGHV3-7	F	IGHD3-10	F	IGHJ5	F	IGHG1	F	CTRSRITMVRENSWFDPW	in-frame	190	0	0	0	0	0	0	0	190	0	0
IGHV3-33	F	IGHD6-13	F	IGHJ1	F	IGHG2	F	CARDFSSSWDSQSLQHW	in-frame	190	0	0	0	190	0	0	0	0	0	0
IGHV2-70D,IGHV2-70	F	IGHD5-12	F	IGHJ4	F	IGHG1	F	CARQTQAEYNGYDLGFNYW	in-frame	190	0	0	0	0	0	0	190	0	0	0
IGHV1-69	F	x	x	IGHJ4	F	IGHG2	F	CARSIPDAVCRGYCGYFDQW	in-frame	190	0	0	0	0	0	0	0	0	0	190
IGHV1-18	F	x	x	IGHJ6	F	IGHG2	F	CARGGPPRGWRSSGGDLKYGLDVW	in-frame	190	0	0	0	190	0	0	0	0	0	0
IGHV1-18	F	x	x	IGHJ6	F	IGHG2	F	CARDLVRAGSLFGYMDVW	in-frame	190	0	0	0	190	0	0	0	0	0	0
IGHV1-18	F	x	x	IGHJ3	F	IGHG1	F	CATRSGSFTLGALDIW	in-frame	190	0	0	0	0	0	0	190	0	0	0
IGHV3-9	F	x	x	IGHJ5	F	IGHG2	F	CAKDAGQRVGTNWFDSW	in-frame	189	189	0	0	0	0	0	0	0	0	0
IGHV3-49	F	x	x	IGHJ6	F	IGHG1	F	CARGVGLDIGSHRVKYFYYYMDVW	in-frame	189	0	0	0	0	0	0	0	0	189	0
IGHV3-33	F	IGHD3-9	F	IGHJ4	F	IGHG1	F	CARGSDILTGYRPGNFDYW	in-frame	189	0	0	189	0	0	0	0	0	0	0
IGHV3-11	F	IGHD3-10	F	IGHJ5	F	IGHG2	F	CARGTSVWFGELLNWFDSW	in-frame	189	0	0	0	0	0	0	189	0	0	0
IGHV2-5	F	x	x	IGHJ4	F	IGHG1	F	CAHRDSGYYANW	in-frame	189	189	0	0	0	0	0	0	0	0	0
IGHV1-3	F	x	x	IGHJ4	F	IGHG2	F	CARATFGKSKMDYW	in-frame	189	0	189	0	0	0	0	0	0	0	0
IGHV1-3	F	IGHD6-19	F	IGHJ4	F	IGHG2	F	CARGTSDGSGWFLDHW	in-frame	189	0	0	0	0	0	0	0	189	0	0
IGHV1-18	F	x	x	IGHJ6	F	IGHG4	F	CGRDLVELWFVPYVLDVW	in-frame	189	0	0	0	189	0	0	0	0	0	0
IGHV4-34,IGHV4-31	F	x	x	IGHJ6	F	IGHG2	F	CARERIPERDYYYSGMDVW	in-frame	188	0	0	0	0	0	0	188	0	0	0
IGHV3-9	F	x	x	IGHJ5	F	IGHG2	F	CVKDAVKVPDGFPPPGWFDTW	in-frame	188	188	0	0	0	0	0	0	0	0	0
IGHV3-7,IGHV3-69-1,IGHV3-48,IGHV3-21	F	x	x	IGHJ4	F	IGHG1	F	CARDVGYLDYW	in-frame	188	0	0	0	0	0	0	188	0	0	0
IGHV3-7,IGHV3-69-1	F	x	x	IGHJ4	F	IGHG1	F	CARQIGYEYGLGTGDFW	in-frame	188	0	0	0	0	0	188	0	0	0	0
IGHV3-33	F	IGHD6-19	F	IGHJ4	F	IGHG1	F	CASDQGSSGWYWGFDNW	in-frame	188	0	0	188	0	0	0	0	0	0	0
IGHV3-20	ORF	IGHD3-22	F	IGHJ4	F	IGHG2	F	CARVGHYYYETSGYYFLDSW	in-frame	188	0	0	0	0	0	188	0	0	0	0
IGHV3-11	F	x	x	IGHJ4,IGHJ5	F	IGHG3	F	CVRGDGDYNSW	in-frame	188	0	0	0	188	0	0	0	0	0	0
IGHV3-11	F	IGHD2-2	F	IGHJ4	F	IGHG2	F	CARHLRCNTNCYALDSW	in-frame	188	0	0	0	0	0	188	0	0	0	0
IGHV1-69D	F	x	x	IGHJ3	F	IGHG1	F	CARDRTNHDNFDIW	in-frame	188	0	0	0	0	0	0	188	0	0	0
IGHV4-61	F	IGHD3-9	F	IGHJ2	F	IGHG1	F	CARDNGPYYDILTGPDWYFDLW	in-frame	187	0	0	0	187	0	0	0	0	0	0
IGHV3-NL1	F	x	x	IGHJ4	F	IGHG2	F	CAKLLHDSDRSGFSSDSW	in-frame	187	0	0	0	0	0	187	0	0	0	0
IGHV3-74	F	IGHD6-13	F	IGHJ4	F	IGHG2	F	CVRVAAAAGTYYFDYW	in-frame	187	0	0	0	0	0	0	0	0	187	0
IGHV3-7	F	IGHD3-22	F	IGHJ4	F	IGHG2	F	CAREGVLLLGDISGYYTGGSFDYW	in-frame	187	0	0	0	187	0	0	0	0	0	0
IGHV3-23D	F	x	x	IGHJ4	F	IGHG4	F	CAKLKSVGGEEYW	in-frame	187	0	0	187	0	0	0	0	0	0	0
IGHV3-23	F	IGHD3-22	F	IGHJ4	F	IGHG1	F	CARGSGNYYPVYIDNW	in-frame	187	0	0	0	0	0	0	0	187	0	0
IGHV1-46	F	x	x	IGHJ4	F	IGHG1	F	CAREGDTYRYFDYW	in-frame	187	0	0	0	0	0	0	0	187	0	0
IGHV4-59,IGHV4-39	F	x	x	IGHJ4	F	IGHG2	F	CAQTGWMITPPFADW	in-frame	186	0	0	0	0	0	0	0	186	0	0
IGHV4-59	F	x	x	IGHJ4	F	IGHG2	F	CARGGASSLPLNCW	in-frame	186	186	0	0	0	0	0	0	0	0	0
IGHV4-34,IGHV4-31	F	x	x	IGHJ5	F	IGHG2	F	CARDRRDSRAYWFDPW	in-frame	186	0	0	0	0	186	0	0	0	0	0
IGHV3-9	F	x	x	IGHJ4	F	IGHG2	F	CAKGVGKQQTVQGWGYHSDYW	in-frame	186	0	0	0	186	0	0	0	0	0	0
IGHV3-9	F	IGHD5-24	ORF	IGHJ4	F	IGHG2	F	CGKGPLRDGYNLDHW	in-frame	186	0	0	0	0	0	0	0	186	0	0
IGHV3-33	F	x	x	IGHJ6	F	IGHG1	F	CARELGRSWFPFYPYYMDVW	in-frame	186	0	0	0	0	0	0	0	0	186	0
IGHV3-23D,IGHV3-23	F	IGHD3-16	F	IGHJ4	F	IGHG2	F	CAKFTIQLGDLSFFDSW	in-frame	186	0	0	0	0	0	0	0	0	0	186
IGHV3-23D	F	x	x	IGHJ4	F	IGHG2	F	CARNLPFDYW	in-frame	186	0	0	0	0	0	0	0	186	0	0
IGHV3-23D	F	x	x	IGHJ4	F	IGHG2	F	CAQGRGRRYPPALEHW	in-frame	186	0	0	0	0	0	0	186	0	0	0
IGHV3-23D	F	x	x	IGHJ3	F	IGHG2	F	CAKEPKGDVIIW	in-frame	186	0	0	0	0	186	0	0	0	0	0
IGHV1-8	F	x	x	IGHJ5	F	IGHG2	F	CAILRGRGGSARWFDPW	in-frame	186	186	0	0	0	0	0	0	0	0	0
IGHV4-34,IGHV4-31	F	IGHD5-12	F	IGHJ3	F	IGHG2	F	CAREVDTVATSDAFDIW	in-frame	185	0	0	0	0	0	185	0	0	0	0
IGHV3-7,IGHV3-69-1,IGHV3-48,IGHV3-21	F	x	x	IGHJ6	F	IGHG1	F	CATFSSADTYDYYATDVW	in-frame	185	0	0	0	0	0	185	0	0	0	0
IGHV3-49	F	IGHD6-19	F	IGHJ4	F	IGHG1	F	CSSRKLSSGWHGFDYW	in-frame	185	185	0	0	0	0	0	0	0	0	0
IGHV3-43	F	x	x	IGHJ6	F	IGHG1	F	CAKGQYTSGPHFYYYMEVW	in-frame	185	0	0	0	0	0	0	185	0	0	0
IGHV3-23D	F	IGHD5-24	ORF	IGHJ4	F	IGHG1	F	CAKGSDGYNYYYLDYW	in-frame	185	0	0	185	0	0	0	0	0	0	0
IGHV2-5	F	IGHD4-17	F	IGHJ5	F	IGHG1	F	CARRLTTVTSWFDPW	in-frame	185	0	0	0	185	0	0	0	0	0	0
IGHV1-18	F	x	x	IGHJ4	F	IGHG2	F	CARDSLNGWYDWDYW	in-frame	185	0	0	0	185	0	0	0	0	0	0
IGHV1-18	F	x	x	IGHJ3	F	IGHG1	F	CARIRDVYYGNDAFDIW	in-frame	185	0	0	185	0	0	0	0	0	0	0
IGHV4-61	F	x	x	IGHJ4	F	IGHG2	F	CARDARYRGIFLDSW	in-frame	184	0	0	0	184	0	0	0	0	0	0
IGHV4-61	F	IGHD3-16	F	IGHJ3	F	IGHG2	F	CARELGGYAYDVW	in-frame	184	0	0	0	0	0	184	0	0	0	0
IGHV3-7,IGHV3-21,IGHV3-11	F	x	x	IGHJ5	F	IGHG2	F	CARGGRTHFDPW	in-frame	184	0	184	0	0	0	0	0	0	0	0
IGHV3-69-1,IGHV3-48	P	x	x	IGHJ6	F	IGHG2	F	CARSGDSLRYMDVW	in-frame	184	0	0	0	0	0	0	0	0	184	0
IGHV3-66	F	x	x	IGHJ4	F	IGHG2	F	CATRGYSTSWDYLDYW	in-frame	184	0	0	0	0	0	184	0	0	0	0
IGHV3-15	F	x	x	IGHJ5,IGHJ4	F	IGHG2	F	CTTGSLDKSTQAEDHW	in-frame	184	0	0	0	0	0	0	184	0	0	0
IGHV1-18	F	x	x	IGHJ4	F	IGHG1	F	CARDRGLREYISRGAFDAW	in-frame	184	0	0	0	0	0	0	0	184	0	0
IGHV7-4-1	F	x	x	IGHJ5	F	IGHG2	F	CVRDKLGETPW	in-frame	183	0	0	0	0	0	0	0	0	183	0
IGHV4-61	F	IGHD3-22	F	IGHJ5	F	IGHG1	F	CARVVDSSGYGWLVPW	in-frame	183	0	0	0	0	0	0	183	0	0	0
IGHV3-9	F	x	x	IGHJ6	F	IGHG2	F	CAKDSGPLVLPYYYDGMDVW	in-frame	183	0	0	0	183	0	0	0	0	0	0
IGHV3-74	F	x	x	IGHJ4	F	IGHG2	F	CTGALPGSFVSDYW	in-frame	183	0	0	0	0	0	183	0	0	0	0
IGHV3-74	F	x	x	IGHJ4	F	IGHG2	F	CARDLSWELFDVW	in-frame	183	0	0	0	0	0	183	0	0	0	0
IGHV3-7	F	IGHD3-22	F	IGHJ6	F	IGHG2	F	CARGHYYDPIHGMDVW	in-frame	183	183	0	0	0	0	0	0	0	0	0
IGHV3-66	F	x	x	IGHJ4	F	IGHG1	F	CARDRGSNWLLYYFDSW	in-frame	183	0	0	0	0	0	0	0	0	183	0
IGHV3-49	F	x	x	IGHJ1	F	IGHG2	F	CVRDTGEPGHW	in-frame	183	0	0	0	0	0	0	183	0	0	0
IGHV3-33	F	x	x	IGHJ2	F	IGHG1	F	CVKKAGKLLVQDWYFDLW	in-frame	183	0	0	0	0	0	0	0	183	0	0
IGHV3-23D	F	IGHD3-9	F	IGHJ2	F	IGHG1	F	CAKGPRWYDILTAFYHNWYFDLW	in-frame	183	0	0	0	0	0	0	183	0	0	0
IGHV3-15	F	IGHD6-13	F	IGHJ4	F	IGHG1	F	CTTGWTYSSSWYP**W	out-of-frame	183	0	0	0	0	0	0	0	183	0	0
IGHV2-5	F	x	x	IGHJ4	F	IGHG1	F	CAHPPVNW	in-frame	183	0	0	0	0	0	0	0	0	183	0
IGHV1-18	F	x	x	IGHJ1	F	IGHG1	F	CTRSRLYDTSGHPADFQHW	in-frame	183	0	183	0	0	0	0	0	0	0	0
IGHV5-51	F	x	x	IGHJ3	F	IGHG2	F	CARRVYVLQTFDIW	in-frame	182	0	182	0	0	0	0	0	0	0	0
IGHV4-59	F	IGHD3-10	F	IGHJ5	F	IGHG2	F	CARYYYGSTRPYWFGPW	in-frame	182	0	0	0	182	0	0	0	0	0	0
IGHV4-39	F	x	x	IGHJ4	F	IGHG1	F	CVRLRGYWWYYIEFW	in-frame	182	0	0	0	0	0	0	0	182	0	0
IGHV4-34,IGHV4-31	F	x	x	IGHJ4	F	IGHG1	F	CVRHPGASFDYW	in-frame	182	0	0	0	0	0	0	182	0	0	0
IGHV3-NL1,IGHV3-30-5,IGHV3-30-3,IGHV3-30	F	x	x	IGHJ3	F	IGHG2	F	CAKIRTIGTGDAFDIW	in-frame	182	0	182	0	0	0	0	0	0	0	0
IGHV3-9	F	x	x	IGHJ4	F	IGHG1	F	CARVGCIRGKCYYDYW	in-frame	182	0	0	0	0	0	182	0	0	0	0
IGHV3-69-1,IGHV3-48	P	x	x	IGHJ6	F	IGHG1	F	CGRDVYNHMMTAYEMTHYYHGMDVW	in-frame	182	0	0	0	0	0	0	0	0	182	0
IGHV3-66	F	x	x	IGHJ4	F	IGHG2	F	CLAGYSSSGAYW	in-frame	182	182	0	0	0	0	0	0	0	0	0
IGHV3-49	F	IGHD6-13	F	IGHJ1	F	IGHG2	F	CASYYSTSWYVFQHW	in-frame	182	182	0	0	0	0	0	0	0	0	0
IGHV3-49	F	IGHD3-10	F	IGHJ4	F	IGHG1	F	CTREGHYYASGSTHW	in-frame	182	0	0	0	182	0	0	0	0	0	0
IGHV2-5	F	x	x	IGHJ4	F	IGHG1	F	CAHTYMISVAEVPLDYW	in-frame	182	0	0	182	0	0	0	0	0	0	0
IGHV1-69	F	x	x	IGHJ6	F	IGHG1	F	CAREGGFETGASTDSPIRAMDVW	in-frame	182	0	0	0	0	0	0	0	0	0	182
IGHV1-58	F	x	x	IGHJ4	F	IGHG1	F	CAVAMLGGFFGNW	in-frame	182	0	0	0	0	0	182	0	0	0	0
IGHV1-18	F	x	x	IGHJ6	F	IGHG3	F	CARQETHVPTHNSYSYMDVW	in-frame	182	0	0	0	0	0	0	182	0	0	0
IGHV7-4-1	F	x	x	IGHJ4	F	IGHG1	F	CARATSYGPGFDYW	in-frame	181	0	0	0	181	0	0	0	0	0	0
IGHV7-4-1	F	IGHD2-2	F	IGHJ3	F	IGHG1	F	CARGYCSSDSCYHAYDIW	in-frame	181	0	181	0	0	0	0	0	0	0	0
IGHV3-9	F	x	x	IGHJ4	F	IGHG1	F	CAKDLRDGIAVAVSTLDSW	in-frame	181	0	0	0	0	0	0	0	181	0	0
IGHV3-74	F	x	x	IGHJ4	F	IGHG2	F	CARDRGYNTLHYW	in-frame	181	0	181	0	0	0	0	0	0	0	0
IGHV3-74	F	IGHD3-10	F	IGHJ6	F	IGHG1	F	CAREGGRNYYGSGNYSIGYYYSMDVW	in-frame	181	0	181	0	0	0	0	0	0	0	0
IGHV3-72	F	IGHD6-19	F	IGHJ5	F	IGHG2	F	CVRSIAVAGAAW	in-frame	181	0	0	0	0	0	0	0	0	181	0
IGHV3-33,IGHV3-30	F	IGHD3-9	F	IGHJ4	F	IGHG2	F	CARDRKHVLTGYFDCW	in-frame	181	0	181	0	0	0	0	0	0	0	0
IGHV3-23D	F	x	x	IGHJ4	F	IGHG2	F	CAKDRGRYCFDYW	in-frame	181	0	0	0	0	181	0	0	0	0	0
IGHV3-15	F	x	x	IGHJ4	F	IGHG2	F	CATPTFASGRLAHW	in-frame	181	0	181	0	0	0	0	0	0	0	0
IGHV3-15	F	x	x	IGHJ1	F	IGHG2	F	CTTHPPMFTDW	in-frame	181	0	0	0	0	0	181	0	0	0	0
IGHV1-24	F	x	x	IGHJ6	F	IGHG1	F	CATHDFGDLYGLDVW	in-frame	181	0	0	0	0	0	0	181	0	0	0
IGHV7-4-1	F	x	x	IGHJ4	F	IGHG2	F	CARHQSLGRGDDYW	in-frame	180	0	0	0	0	0	0	180	0	0	0
IGHV4/OR15-8	ORF	IGHD1-1	F	IGHJ4	F	IGHG2	F	CARVPASYNLNSYFDYW	in-frame	180	0	0	0	0	0	0	180	0	0	0
IGHV4-61,IGHV4-34	ORF	IGHD3-9	F	IGHJ4	F	IGHG1	F	CAMGDPILTGYYPLDYW	in-frame	180	0	0	0	0	0	0	180	0	0	0
IGHV4-61	F	x	x	IGHJ3	F	IGHG1	F	CARGGDAFDVW	in-frame	180	0	0	0	0	0	0	0	0	180	0
IGHV4-61	F	IGHD6-19	F	IGHJ4	F	IGHG1	F	CARCRILGSGWYVADYW	in-frame	180	0	0	0	0	0	0	180	0	0	0
IGHV4-61	F	IGHD1-7	F	IGHJ5	F	IGHG1	F	CAGGITGTPSYSWFDPW	in-frame	180	180	0	0	0	0	0	0	0	0	0
IGHV4-59	F	x	x	IGHJ4	F	IGHG1	F	CARGAGTTTGPLDYW	in-frame	180	0	0	0	0	0	0	0	180	0	0
IGHV3-NL1	F	IGHD6-19	F	IGHJ3	F	IGHG2	F	CAKVIHPGRIPVAGRVFDVW	in-frame	180	0	0	0	0	180	0	0	0	0	0
IGHV3-9	F	x	x	IGHJ6	F	IGHG2	F	CVKDIGPGGADVW	in-frame	180	0	0	0	0	0	180	0	0	0	0
IGHV3-48	F	IGHD3-22	F	IGHJ4	F	IGHG1	F	CARSPVRHQYDSSGLLWSDYW	in-frame	180	0	0	0	0	0	0	180	0	0	0
IGHV3-33,IGHV3-30	F	x	x	IGHJ4	F	IGHG2	F	CVRSSYYDGSGFYWGLFDYW	in-frame	180	0	0	0	0	0	0	0	0	180	0
IGHV3-33	F	x	x	IGHJ1	F	IGHG2	F	CARNGGDDWKYFQNW	in-frame	180	0	0	0	0	0	180	0	0	0	0
IGHV5-51	F	x	x	IGHJ4	F	IGHG1	F	CATLGRTSYGGYDYW	in-frame	179	179	0	0	0	0	0	0	0	0	0
IGHV4-61,IGHV4-59	F	x	x	IGHJ6	F	IGHG2	F	CARWPQRQYYMDVW	in-frame	179	0	0	0	0	0	0	179	0	0	0
IGHV3-NL1,IGHV3-30-5,IGHV3-30-3,IGHV3-30	F	x	x	IGHJ4	F	IGHG2	F	CAKDFPIEWQLPNYFFGSW	in-frame	179	0	0	0	0	0	0	179	0	0	0
IGHV3-9	F	x	x	IGHJ4	F	IGHG2	F	CTKGPLGTVAGSPDFDFW	in-frame	179	179	0	0	0	0	0	0	0	0	0
IGHV3-9	F	IGHD3-10	F	IGHJ4	F	IGHG1	F	CTKGKMVRGVIGANYFDHW	in-frame	179	0	0	0	0	0	0	179	0	0	0
IGHV3-74	F	x	x	IGHJ4	F	IGHG2	F	CARGGAEPFDL*W	out-of-frame	179	0	0	0	0	179	0	0	0	0	0
IGHV3-48	F	x	x	IGHJ5	F	IGHG1	F	CAILGATTGGSW	in-frame	179	0	0	0	0	0	0	179	0	0	0
IGHV3-33	F	IGHD3-16	F	IGHJ4	F	IGHG2	F	CARDASIAVGGVIARSYFDYW	in-frame	179	0	0	0	0	0	179	0	0	0	0
IGHV3-23D	F	IGHD3-10	F	IGHJ4	F	IGHG1	F	CAKCQHGSGSPNDHW	in-frame	179	0	0	0	0	0	0	0	0	179	0
IGHV2-5	F	x	x	IGHJ4	F	IGHG2	F	CAHWGYYDSRRPFDHW	in-frame	179	0	0	0	179	0	0	0	0	0	0
IGHV4-61,IGHV4-30-4	ORF	x	x	IGHJ6	F	IGHG2	F	CARDRTLPFPGTSGHSYYGMDVW	in-frame	178	0	0	0	178	0	0	0	0	0	0
IGHV4-34,IGHV4-31	F	x	x	IGHJ3	F	IGHG3	F	CARVEGANDVFDIW	in-frame	178	0	0	0	0	0	178	0	0	0	0
IGHV4-34	F	x	x	IGHJ5,IGHJ4	F	IGHG2	F	CAKSAFRGPASPFDLW	in-frame	178	0	0	0	0	0	0	0	0	178	0
IGHV3-9	F	x	x	IGHJ6	F	IGHG1	F	CVKDHSSGERSYYGLEVW	in-frame	178	0	0	178	0	0	0	0	0	0	0
IGHV3-9	F	x	x	IGHJ4	F	IGHG2	F	CVKDMGNHHGLGTDYYDYW	in-frame	178	0	0	0	0	0	178	0	0	0	0
IGHV3-72	F	x	x	IGHJ5	F	IGHG1	F	CVCSFNYYSRPW	in-frame	178	0	0	0	0	0	0	178	0	0	0
IGHV3-53	F	IGHD3-10	F	IGHJ4	F	IGHG1	F	CARNSPVLHYGSGDYFDNW	in-frame	178	0	0	0	0	0	0	178	0	0	0
IGHV3-30	F	x	x	IGHJ4	F	IGHG1	F	CAREAYDRKYFDSW	in-frame	178	0	0	0	0	0	0	0	178	0	0
IGHV3-15	F	x	x	IGHJ4	F	IGHG1	F	CTTEFLPGSPPFGYW	in-frame	178	0	0	178	0	0	0	0	0	0	0
IGHV3-15	F	x	x	IGHJ4	F	IGHG1	F	CATNEVGHCSGGSCHLDHW	in-frame	178	0	0	0	0	0	0	0	178	0	0
IGHV4-61	F	x	x	IGHJ5	F	IGHG2	F	CARVVFNTWFDPW	in-frame	177	0	0	0	177	0	0	0	0	0	0
IGHV3-72	F	IGHD1-26	F	IGHJ3	F	IGHG1	F	CARVMGATLGGFDLW	in-frame	177	0	0	0	0	0	0	0	0	177	0
IGHV1-18	F	x	x	IGHJ6	F	IGHG1	F	CARGYDLLNAYLPLTNNYYYYGLDVW	in-frame	177	0	0	0	177	0	0	0	0	0	0
IGHV1-18	F	x	x	IGHJ4	F	IGHG2	F	CTRVGYGINFLDLW	in-frame	177	0	0	0	0	0	0	0	0	177	0
IGHV7-4-1	F	x	x	IGHJ6	F	IGHG2	F	CVRVSKYYDLQTGETSRLMDVW	in-frame	176	0	176	0	0	0	0	0	0	0	0
IGHV5-10-1	F	IGHD5-12	F	IGHJ4,IGHJ5	F	IGHG1	F	CARARYGGYSPVDLW	in-frame	176	0	176	0	0	0	0	0	0	0	0
IGHV3-9	F	IGHD5-12	F	IGHJ5,IGHJ4	F	IGHG2	F	CVKDSHSYRGYDLGLFIW	in-frame	176	176	0	0	0	0	0	0	0	0	0
IGHV3-74	F	x	x	IGHJ4	F	IGHG2	F	CARDAGGGTPFDLW	in-frame	176	0	0	0	0	0	176	0	0	0	0
IGHV3-74	F	x	x	IGHJ4	F	IGHG1	F	CVRGETWGQRTWDYW	in-frame	176	0	0	0	0	0	0	0	176	0	0
IGHV3-7,IGHV3-69-1,IGHV3-48	F	x	x	IGHJ4	F	IGHG2	F	CARDGHFNTNPLDYW	in-frame	176	0	0	0	176	0	0	0	0	0	0
IGHV3-7	F	x	x	IGHJ5	F	IGHG2	F	CARLVGWGRFDHW	in-frame	176	0	0	0	176	0	0	0	0	0	0
IGHV3-23D	F	x	x	IGHJ5	F	IGHG2	F	CTTDVVVYPASHNFFDPW	in-frame	176	0	0	0	0	0	0	0	0	176	0
IGHV3-15	F	x	x	IGHJ5	F	IGHG2	F	CTAAVGVTAAWGWGATFDPW	in-frame	176	176	0	0	0	0	0	0	0	0	0
IGHV3-13	F	x	x	IGHJ5	F	IGHG2	F	CVRAGGVGATWSWFNPW	in-frame	176	0	0	0	0	0	0	0	0	176	0
IGHV2-70D,IGHV2-70	F	x	x	IGHJ4	F	IGHG1	F	CALASRGRSESGFDYW	in-frame	176	0	0	0	0	0	0	176	0	0	0
IGHV1-18	F	IGHD3-3	F	IGHJ4	F	IGHG2	F	CAREPDFWNGHSRLTDYFDYW	in-frame	176	176	0	0	0	0	0	0	0	0	0
IGHV4-61	F	x	x	IGHJ6	F	IGHG1	F	CARETTYRRDYYGLDVW	in-frame	175	175	0	0	0	0	0	0	0	0	0
IGHV4-34	F	x	x	IGHJ6	F	IGHG2	F	CALQTRGVFGMGVW	in-frame	175	0	0	0	0	0	0	0	0	175	0
IGHV3-71	P	x	x	IGHJ5	F	IGHG2	F	CARSNYFRTHQFDPW	in-frame	175	0	0	0	0	0	0	0	0	175	0
IGHV3-49	F	x	x	IGHJ1	F	IGHG2	F	CTTYYTPGSWYTFQHW	in-frame	175	175	0	0	0	0	0	0	0	0	0
IGHV3-23D	F	IGHD6-19	F	IGHJ1	F	IGHG2	F	CAKDSTPPGTSGWFPQYFQNW	in-frame	175	0	0	0	0	0	0	0	175	0	0
IGHV3-15	F	x	x	IGHJ4	F	IGHG2	F	CTTWSYSSLELW	in-frame	175	0	175	0	0	0	0	0	0	0	0
IGHV4-61	F	x	x	IGHJ4	F	IGHG1	F	CAREGVDCNTESCHSFDSW	in-frame	174	0	0	0	174	0	0	0	0	0	0
IGHV4-59	F	x	x	IGHJ5	F	IGHG2	F	CARGLMAPDPW	in-frame	174	174	0	0	0	0	0	0	0	0	0
IGHV3-NL1,IGHV3-30-5,IGHV3-30-3,IGHV3-30	F	IGHD2-15	F	IGHJ5	F	IGHG1	F	CSKDLRSGGSCHDHW	in-frame	174	0	0	174	0	0	0	0	0	0	0
IGHV3-9	F	x	x	IGHJ6	F	IGHG1	F	CAKDNRGGLEYYYSYGMDVW	in-frame	174	0	0	0	0	0	0	174	0	0	0
IGHV3-9	F	x	x	IGHJ4	F	IGHG2	F	CAKGLLLSPNVAFDSW	in-frame	174	0	0	174	0	0	0	0	0	0	0
IGHV3-49	F	x	x	IGHJ1	F	IGHG1	F	CTTYYGTNWRVFRHW	in-frame	174	174	0	0	0	0	0	0	0	0	0
IGHV3-23D	F	x	x	IGHJ6	F	IGHG2	F	CAKRVGFGRGMDVW	in-frame	174	0	0	0	0	174	0	0	0	0	0
IGHV3-15	F	x	x	IGHJ4	F	IGHG2	F	CATWAGFSWSGPFDHW	in-frame	174	1	0	0	0	0	173	0	0	0	0
IGHV3-15	F	IGHD3-22	F	IGHJ4	F	IGHG2	F	CTADVADSSGYSHDYW	in-frame	174	174	0	0	0	0	0	0	0	0	0
IGHV1-2	F	x	x	IGHJ4	F	IGHG2	F	CARFLVPAALDYW	in-frame	174	0	0	0	0	0	0	0	174	0	0
IGHV1-18	F	IGHD3-10	F	IGHJ4	F	IGHG2	F	CARDWYFFGSESPNQLDHW	in-frame	174	0	0	0	174	0	0	0	0	0	0
IGHV3/OR16-9	ORF	x	x	IGHJ4	F	IGHG2	F	CLGGYYYEYW	in-frame	173	0	0	0	0	0	0	0	173	0	0
IGHV3-53	F	IGHD3-10	F	IGHJ4	F	IGHG1	F	CAKGQITMVRGVLNSW	in-frame	173	0	0	0	0	0	0	173	0	0	0
IGHV3-35	ORF	x	x	IGHJ4	F	IGHG2	F	CLAGYSSSGAFW	in-frame	173	173	0	0	0	0	0	0	0	0	0
IGHV3-23D	F	x	x	IGHJ4	F	IGHG2	F	CTKVEERSGLITSFIDYW	in-frame	173	0	0	0	173	0	0	0	0	0	0
IGHV3-15	F	IGHD6-13	F	IGHJ4	F	IGHG1	F	CTTSSSWSDYW	in-frame	173	173	0	0	0	0	0	0	0	0	0
IGHV3-11	F	x	x	IGHJ4	F	IGHG2	F	CATSRVFDYW	in-frame	173	0	0	0	0	0	173	0	0	0	0
IGHV2-70D,IGHV2-70	F	IGHD3-9	F	IGHJ3	F	IGHG1	F	CARIRSFYYDILTGYPTPDAFDIW	in-frame	173	0	173	0	0	0	0	0	0	0	0
IGHV2-70D,IGHV2-70	F	IGHD1-26	F	IGHJ6	F	IGHG1	F	CARIGGSYYYYMDVW	in-frame	173	0	0	0	0	0	0	0	0	173	0
IGHV4-59	F	IGHD2/OR15-2b,IGHD2/OR15-2a	ORF	IGHJ4	F	IGHG1	F	CARGFRGGTIAIDYFDFW	in-frame	172	0	0	0	0	0	0	0	172	0	0
IGHV4-30-4	F	x	x	IGHJ4	F	IGHG1	F	CARDRGGDYRPFDYW	in-frame	172	0	172	0	0	0	0	0	0	0	0
IGHV3-74	F	x	x	IGHJ4	F	IGHG2	F	CARDLNWELYDYW	in-frame	172	0	0	0	0	0	172	0	0	0	0
IGHV3-48	F	x	x	IGHJ4	F	IGHG1	F	CARDRPGPILQLEYW	in-frame	172	0	0	0	0	0	1	0	0	171	0
IGHV3-23D	F	x	x	IGHJ4	F	IGHG2	F	CAKETVGGAGWYTVDHW	in-frame	172	0	0	0	0	0	172	0	0	0	0
IGHV3-23D	F	IGHD2-15	F	IGHJ3	F	IGHG1	F	CARPVEEVRGYCSGGTCYAFDIW	in-frame	172	0	0	0	0	172	0	0	0	0	0
IGHV1-18	F	x	x	IGHJ6	F	IGHG1	F	CGRVGLHTSYYMDVW	in-frame	172	0	0	0	0	0	0	0	172	0	0
IGHV4/OR15-8	ORF	x	x	IGHJ4	F	IGHG2	F	CVRHADTAIITDFDYW	in-frame	171	0	0	0	0	0	171	0	0	0	0
IGHV3/OR16-6,IGHV3-15	ORF	x	x	IGHJ4	F	IGHG2	F	CITGQGLTDTDYW	in-frame	171	0	0	0	0	0	0	0	171	0	0
IGHV3-9	F	x	x	IGHJ3	F	IGHG1	F	CVKDLGALVAAADDQGGFEVW	in-frame	171	0	0	171	0	0	0	0	0	0	0
IGHV3-71	P	x	x	IGHJ6	F	IGHG1	F	CARALHEAHQYYYMDVW	in-frame	171	0	0	0	0	0	0	0	0	171	0
IGHV3-7,IGHV3-69-1,IGHV3-48	F	x	x	IGHJ4	F	IGHG2	F	CARGSFDCRGVDYW	in-frame	171	171	0	0	0	0	0	0	0	0	0
IGHV3-7	F	x	x	IGHJ5	F	IGHG2	F	CARDGAVYFGHWFDPW	in-frame	171	0	0	0	0	0	0	171	0	0	0
IGHV3-23D	F	x	x	IGHJ6	F	IGHG1	F	CAKRIAVSTTNAMDVW	in-frame	171	0	0	0	0	0	0	0	0	171	0
IGHV3-23D	F	IGHD3-22	F	IGHJ6	F	IGHG1	F	CAKDVYYYDSSGYYVTLEEAYYYYGMDVW	in-frame	171	0	0	0	0	0	0	171	0	0	0
IGHV3-15	F	x	x	IGHJ4	F	IGHG2	F	CTAGYPIDHW	in-frame	171	0	0	0	0	171	0	0	0	0	0
IGHV3-NL1,IGHV3-30-5,IGHV3-30-3,IGHV3-30	F	x	x	IGHJ4	F	IGHG2	F	CAKDLPIEWQLPNYFFGNW	in-frame	170	0	0	0	0	0	0	170	0	0	0
IGHV3-73	F	x	x	IGHJ6	F	IGHG3	F	CTRIKSRDDGGYYFYMDVW	in-frame	170	0	0	0	0	0	0	170	0	0	0
IGHV3-7,IGHV3-69-1,IGHV3-48	F	x	x	IGHJ4	F	IGHG2	F	CARDLGHYLRFGGEDYW	in-frame	170	0	0	0	0	0	0	0	0	170	0
IGHV3-21	F	x	x	IGHJ4	F	IGHG1	F	CAMRYDYW	in-frame	170	0	0	0	0	0	0	0	0	170	0
IGHV2-70D,IGHV2-70	F	IGHD3-22	F	IGHJ4	F	IGHG1	F	CASMRDAFYPDSTGHYYFDRW	in-frame	170	0	0	0	0	0	170	0	0	0	0
IGHV1-8	F	x	x	IGHJ4	F	IGHG1	F	CTRPHGRIYDTSSYYYFDFW	in-frame	170	0	0	0	0	0	170	0	0	0	0
IGHV1-18	F	x	x	IGHJ6	F	IGHG2	F	CARDGTSVLGGDGDYYFYGMDVW	in-frame	170	0	0	0	0	0	0	0	0	170	0
IGHV4-61,IGHV4-59	F	x	x	IGHJ5	F	IGHG2	F	CARESAGGHVEDYFDPW	in-frame	169	169	0	0	0	0	0	0	0	0	0
IGHV4-59	F	x	x	IGHJ5	F	IGHG2	F	CARGGPRPRWLDPW	in-frame	169	0	0	0	0	0	0	0	0	169	0
IGHV3/OR16-6,IGHV3-15	ORF	x	x	IGHJ4	F	IGHG2	F	CVMDLPGNSPGIDNW	in-frame	169	0	0	0	0	0	0	0	0	169	0
IGHV3-NL1,IGHV3-30-5,IGHV3-30-3,IGHV3-30	F	x	x	IGHJ4	F	IGHG2	F	CGKGCNTPYCFFTEYW	in-frame	169	0	0	0	0	0	169	0	0	0	0
IGHV3-9	F	x	x	IGHJ4	F	IGHG2	F	CVKDDPNGSVDSW	in-frame	169	0	0	0	169	0	0	0	0	0	0
IGHV3-74	F	x	x	IGHJ4	F	IGHG2	F	CARDGGDGTPFDYW	in-frame	169	0	0	0	0	0	0	169	0	0	0
IGHV3-7,IGHV3-69-1,IGHV3-48,IGHV3-21	F	IGHD6-19	F	IGHJ4	F	IGHG1	F	CARVYSSGWYGGAWPYYFDYW	in-frame	169	0	0	0	0	0	169	0	0	0	0
IGHV3-7,IGHV3-21,IGHV3-11	F	x	x	IGHJ4	F	IGHG1	F	CVRGGDNSGSYFDFW	in-frame	169	0	0	0	0	0	0	0	0	169	0
IGHV3-7	F	x	x	IGHJ6	F	IGHG4	F	CARDLSYRVTTGSLDVW	in-frame	169	0	0	0	0	0	169	0	0	0	0
IGHV3-48	F	IGHD4-17	F	IGHJ4	F	IGHG2	F	CATRVDYGDFGRGVCDFW	in-frame	169	169	0	0	0	0	0	0	0	0	0
IGHV3-11	F	x	x	IGHJ3	F	IGHG2	F	CARDFRYGGADVW	in-frame	169	0	0	0	169	0	0	0	0	0	0
IGHV1-18	F	x	x	IGHJ6	F	IGHG1	F	CARDKEKQWLPEYYYGMDVW	in-frame	169	0	0	169	0	0	0	0	0	0	0
IGHV5-51	F	x	x	IGHJ4,IGHJ5	F	IGHG1	F	CARRGPGVWYQSDLW	in-frame	168	0	0	0	0	0	0	0	0	168	0
IGHV3-66	F	x	x	IGHJ4	F	IGHG2	F	CARPKYDYAELDSW	in-frame	168	0	0	0	0	0	168	0	0	0	0
IGHV3-15	F	x	x	IGHJ4	F	IGHG2	F	CSAPESEGYW	in-frame	168	0	0	0	168	0	0	0	0	0	0
IGHV2-70,IGHV2-5	F	IGHD3-9	F	IGHJ4	F	IGHG1	F	CAHKSFYYDPLTGDYISPPFDYW	in-frame	168	0	0	0	0	168	0	0	0	0	0
IGHV1/OR15-1	ORF	IGHD2-15	F	IGHJ6	F	IGHG1	F	CANRPTGGRPTRDCSGGSCYSRYYFSGMDVW	in-frame	168	0	0	0	0	0	0	0	0	168	0
IGHV4-39	F	IGHD3-9	F	IGHJ5	F	IGHG2	F	CARLPAVLTGYHQGWFDPW	in-frame	167	0	0	0	0	0	0	167	0	0	0
IGHV3-NL1	F	IGHD2-8	F	IGHJ4	F	IGHG2	F	CTNGDRGSYPEFEYW	in-frame	167	0	167	0	0	0	0	0	0	0	0
IGHV3-9	F	x	x	IGHJ6	F	IGHG2	F	CARVRAPGGNLNYYYGMDVW	in-frame	167	167	0	0	0	0	0	0	0	0	0
IGHV3-74	F	x	x	IGHJ4	F	IGHG1	F	CARSVGWIFDYW	in-frame	167	0	0	0	0	0	0	167	0	0	0
IGHV3-49	F	x	x	IGHJ1	F	IGHG1	F	CTTYYNNTSWRVFQQW	in-frame	167	167	0	0	0	0	0	0	0	0	0
IGHV1-69D	F	x	x	IGHJ4	F	IGHG1	F	CACNDNHQWLLDFW	in-frame	167	0	0	0	0	0	0	0	167	0	0
IGHV1-69-2	F	x	x	IGHJ4	F	IGHG2	F	CARSIPDSVCRGYCGYFDRW	in-frame	167	0	0	0	0	0	0	0	0	0	167
IGHV1-3	F	x	x	IGHJ4	F	IGHG1	F	CARDRRLGTFYLDYW	in-frame	167	0	0	0	0	0	0	0	0	167	0
IGHV4-61,IGHV4-59	F	x	x	IGHJ6	F	IGHG2	F	CVRDRGSDWNENGFYYGMDVW	in-frame	166	0	0	0	0	0	0	0	0	166	0
IGHV4-34,IGHV4-31	F	IGHD2-21	F	IGHJ4	F	IGHG1	F	CVRSPCGGDCYLWFYFDSW	in-frame	166	0	0	166	0	0	0	0	0	0	0
IGHV3-9	F	IGHD2-2	F	IGHJ4	F	IGHG1	F	CTKGSGDQLLLDFDFW	in-frame	166	0	0	166	0	0	0	0	0	0	0
IGHV3-71	P	x	x	IGHJ4	F	IGHG2	F	CATRPPSENYLGVFDFW	in-frame	166	0	0	0	0	0	0	0	166	0	0
IGHV3-7	F	IGHD3-3	F	IGHJ4	F	IGHG1	F	CARHSGRVSKATIYGVVTMLNDYW	in-frame	166	0	0	0	0	0	0	0	0	166	0
IGHV3-48	F	x	x	IGHJ6	F	IGHG2	F	CVTEPQTIGYFGLDVW	in-frame	166	0	0	0	166	0	0	0	0	0	0
IGHV3-33	F	x	x	IGHJ4	F	IGHG2	F	CARDDCTTTSCYGHW	in-frame	166	0	0	0	0	166	0	0	0	0	0
IGHV3-23D	F	x	x	IGHJ6	F	IGHG4	F	CAKSVVGTGLWYYMDVW	in-frame	166	0	0	0	0	0	0	0	0	166	0
IGHV3-23D	F	x	x	IGHJ4	F	IGHG2	F	CATLGVRLETGGHDYW	in-frame	166	0	0	0	0	0	0	166	0	0	0
IGHV3-23D	F	x	x	IGHJ4	F	IGHG1	F	CAKGAVGFDYW	in-frame	166	0	166	0	0	0	0	0	0	0	0
IGHV3-23D	F	IGHD4-17	F	IGHJ4	F	IGHG1	F	CAKDRMDYYYGDYVDSW	in-frame	166	0	0	0	0	0	0	0	0	166	0
IGHV3-15	F	x	x	IGHJ5	F	IGHG2	F	CATGSGGLLGPW	in-frame	166	0	0	0	0	0	0	166	0	0	0
IGHV2-70,IGHV2-5	F	IGHD2-2,IGHD2-15	F	IGHJ4	F	IGHG2	F	CAHRVEVGYCRSRNCYEGGFDYW	in-frame	166	0	0	0	166	0	0	0	0	0	0
IGHV1-3	F	x	x	IGHJ4	F	IGHG1	F	CARVSYKSDFGDFDYW	in-frame	166	0	0	0	0	166	0	0	0	0	0
IGHV1-18	F	IGHD1-26	F	IGHJ4	F	IGHG3	F	CARDGDPFSGSYYLNYW	in-frame	166	0	0	0	0	0	0	166	0	0	0
IGHV7-4-1	F	x	x	IGHJ4	F	IGHG1	F	CARDLKGSWYGAYW	in-frame	165	165	0	0	0	0	0	0	0	0	0
IGHV5-51	F	IGHD6-19	F	IGHJ4	F	IGHG2	F	CARVSAPVTAVAVGDYW	in-frame	165	0	0	0	0	0	0	0	165	0	0
IGHV4-39	F	IGHD5-12	F	IGHJ3	F	IGHG2	F	CARQGNLVATGAFDIW	in-frame	165	0	0	0	165	0	0	0	0	0	0
IGHV3-71	P	x	x	IGHJ4	F	IGHG1	F	CARDVGYLDYW	in-frame	165	0	0	0	0	0	0	165	0	0	0
IGHV3-64	F	x	x	IGHJ4	F	IGHG1	F	CARPALRWFGDLLGVIEDSDYW	in-frame	165	0	0	0	0	0	0	165	0	0	0
IGHV3-30	F	x	x	IGHJ6	F	IGHG1	F	CARDREGEYYYGMDVW	in-frame	165	0	0	0	0	0	165	0	0	0	0
IGHV3-23D	F	IGHD2-2	F	IGHJ6	F	IGHG2	F	CAKDGYCGSPRCYHVYNDGMDVW	in-frame	165	0	0	0	165	0	0	0	0	0	0
IGHV3-20	ORF	x	x	IGHJ5	F	IGHG2	F	CARTGASGWKRLYNWFDPW	in-frame	165	0	0	0	165	0	0	0	0	0	0
IGHV2-5	F	x	x	IGHJ4	F	IGHG1	F	CAHGYNDLGDFEGYLEYW	in-frame	165	0	0	0	0	0	0	165	0	0	0
IGHV1-3	F	x	x	IGHJ4	F	IGHG2	F	CARSPLGYSPSWHYFDYW	in-frame	165	0	0	0	0	0	0	0	165	0	0
IGHV4-61	F	x	x	IGHJ6	F	IGHG4	F	CTRGPLEVTAFSYVYYGMDVW	in-frame	164	0	0	0	164	0	0	0	0	0	0
IGHV4-61	F	x	x	IGHJ4	F	IGHG1	F	CARLTGGFYQIDYW	in-frame	164	0	0	0	0	0	0	0	164	0	0
IGHV4-61	F	IGHD3-9	F	IGHJ3	F	IGHG1	F	CVREMSATYVERYFDWLSNDAFNIW	in-frame	164	0	0	0	0	0	0	0	0	164	0
IGHV3-NL1,IGHV3-30-5,IGHV3-30-3,IGHV3-30	F	x	x	IGHJ4	F	IGHG2	F	CAKDHNDYLVDYW	in-frame	164	0	0	0	0	0	0	0	164	0	0
IGHV3-49	F	IGHD2-8	F	IGHJ4	F	IGHG2	F	CTRWRTRSFFDVW	in-frame	164	164	0	0	0	0	0	0	0	0	0
IGHV3-23D	F	x	x	IGHJ1	F	IGHG2	F	CAKDWTPPNTRGWFPQYFQHW	in-frame	164	0	0	0	0	0	0	0	164	0	0
IGHV3-15	F	x	x	IGHJ4	F	IGHG2	F	CTSRVVTTSDNW	in-frame	164	0	164	0	0	0	0	0	0	0	0
IGHV3-15	F	x	x	IGHJ4	F	IGHG1	F	CATASHGSTQPFEFW	in-frame	164	0	0	0	0	0	0	164	0	0	0
IGHV3-15	F	x	x	IGHJ1,IGHJ5,IGHJ4	F	IGHG2	F	CTTFRQLLHW	in-frame	164	0	0	0	0	164	0	0	0	0	0
IGHV4-61	F	x	x	IGHJ6	F	IGHG1	F	CARDEVYGMDVW	in-frame	163	0	0	0	0	0	0	163	0	0	0
IGHV3-NL1	F	x	x	IGHJ4	F	IGHG2	F	CAKDHNDYLVDYW	in-frame	163	0	0	0	0	0	0	0	163	0	0
IGHV3-9	F	x	x	IGHJ4	F	IGHG1	F	CAKGAFGGYQLLPIDYW	in-frame	163	163	0	0	0	0	0	0	0	0	0
IGHV1-8	F	IGHD3-9	F	IGHJ4	F	IGHG2	F	CARGRLRYFDWLYPYW	in-frame	163	163	0	0	0	0	0	0	0	0	0
IGHV1-69	F	x	x	IGHJ6	F	IGHG2	F	CAKASSRGDYFRSDYYDMDVW	in-frame	163	0	0	163	0	0	0	0	0	0	0
IGHV5-51	F	x	x	IGHJ1	F	IGHG2	F	CVRWFGANFEYFQYW	in-frame	162	0	0	0	0	0	162	0	0	0	0
IGHV5-51	F	IGHD6-19	F	IGHJ4	F	IGHG1	F	CARHVDSSGCFDSW	in-frame	162	0	0	0	0	0	0	162	0	0	0
IGHV4-61,IGHV4-59	F	x	x	IGHJ3	F	IGHG1	F	CARVNTALVADAFDMW	in-frame	162	0	0	0	0	0	0	0	0	162	0
IGHV4-59,IGHV4-39	F	IGHD3-10	F	IGHJ6	F	IGHG1	F	CARLYMSGSYWEDYHYNYYMDVW	in-frame	162	0	0	0	0	0	0	0	0	162	0
IGHV3-NL1,IGHV3-30-5,IGHV3-30-3,IGHV3-30	F	x	x	IGHJ3	F	IGHG1	F	CAKGLSGGDYDGLDIW	in-frame	162	0	162	0	0	0	0	0	0	0	0
IGHV3-23D	F	x	x	IGHJ4	F	IGHG1	F	CATYTATAPDYW	in-frame	162	0	0	0	0	0	0	0	0	162	0
IGHV2-70D,IGHV2-70	F	IGHD3-10	F	IGHJ3	F	IGHG1	F	CARLTQSYYYGSGSYRDAFDIW	in-frame	162	0	0	0	0	0	0	0	0	162	0
IGHV1-46	F	x	x	IGHJ4	F	IGHG1	F	CARRRSNGPFDYW	in-frame	162	0	0	0	0	162	0	0	0	0	0
IGHV1-3	F	x	x	IGHJ4	F	IGHG1	F	CAREWWVDSHFDYW	in-frame	162	0	0	0	0	0	0	0	0	162	0
IGHV1-18	F	x	x	IGHJ6	F	IGHG1	F	CARFSSHFDDPMGRGMDVW	in-frame	162	0	0	0	0	0	0	162	0	0	0
IGHV4-59	F	x	x	IGHJ5	F	IGHG2	F	CARGGASSKWFDPW	in-frame	161	161	0	0	0	0	0	0	0	0	0
IGHV4-59	F	x	x	IGHJ4	F	IGHG2	F	CARFRPGGELRLYYFDFW	in-frame	161	0	0	0	0	0	0	0	0	161	0
IGHV4-34,IGHV4-31	F	x	x	IGHJ4	F	IGHG1	F	CARGTDFTAGGVYFDFW	in-frame	161	0	0	0	0	161	0	0	0	0	0
IGHV4-34	F	x	x	IGHJ5	F	IGHG1	F	CARGEDPVLQVSTWGGVIGHPTWFDPW	in-frame	161	0	0	0	0	0	0	0	0	161	0
IGHV3/OR16-9	ORF	IGHD6-13	F	IGHJ1,IGHJ5,IGHJ4	F	IGHG2	F	CVAGGATSSWYWRHW	in-frame	161	0	0	0	0	0	161	0	0	0	0
IGHV3-7	F	x	x	IGHJ4	F	IGHG2	F	CVREPAAGAYYFDYW	in-frame	161	0	0	0	0	0	0	0	0	161	0
IGHV3-7	F	x	x	IGHJ4	F	IGHG2	F	CVPWGTHNYW	in-frame	161	0	0	0	0	0	0	0	161	0	0
IGHV3-53	F	x	x	IGHJ3	F	IGHG1	F	CAAGDLFGFGFGAFDIW	in-frame	161	0	0	0	0	0	0	0	0	161	0
IGHV3-33	F	x	x	IGHJ4	F	IGHG2	F	CVRDDRHNSGWHFDYW	in-frame	161	0	161	0	0	0	0	0	0	0	0
IGHV3-30-3	F	IGHD2-21	F	IGHJ4	F	IGHG1	F	CARDPHIVVVTGALVDYW	in-frame	161	0	0	0	0	0	0	0	0	161	0
IGHV3-23D	F	x	x	IGHJ1	F	IGHG2	F	CAKDSTPPNTIGWYPQYFQEW	in-frame	161	0	0	0	0	0	0	0	161	0	0
IGHV3-23	F	x	x	IGHJ4	F	IGHG2	F	CAKGRESSDWYRWAIDYW	in-frame	161	0	0	0	0	0	0	0	161	0	0
IGHV3-11	F	x	x	IGHJ6	F	IGHG2	F	CARARYIDVW	in-frame	161	161	0	0	0	0	0	0	0	0	0
IGHV2-70	F	x	x	IGHJ4	F	IGHG3	F	CARVDLWGDPPRWLDFW	in-frame	161	0	0	0	0	0	161	0	0	0	0
IGHV7-4-1	F	x	x	IGHJ4	F	IGHG1	F	CARGSVAATFDFW	in-frame	160	0	0	0	0	0	0	160	0	0	0
IGHV4-34,IGHV4-31	F	x	x	IGHJ3	F	IGHG1	F	CARDARSWGGLDIW	in-frame	160	0	0	0	0	0	0	160	0	0	0
IGHV4-34,IGHV4-31	F	IGHD2-15	F	IGHJ4	F	IGHG1	F	CARQHCGGGSCYYPLFDYW	in-frame	160	0	160	0	0	0	0	0	0	0	0
IGHV3-9	F	x	x	IGHJ3	F	IGHG2	F	CAKDMYSLGTGGAFDFW	in-frame	160	0	0	0	160	0	0	0	0	0	0
IGHV3-7,IGHV3-33,IGHV3-11	F	x	x	IGHJ6	F	IGHG1	F	CARDAPIDHDFSSLPFEEDANYYHFYMDVW	in-frame	160	0	0	0	0	0	0	0	160	0	0
IGHV3-69-1,IGHV3-48	P	IGHD3-10	F	IGHJ4	F	IGHG1	F	CARCPFYYGSGSYYPFDHW	in-frame	160	0	0	0	0	0	0	0	0	160	0
IGHV3-66	F	x	x	IGHJ6	F	IGHG2	F	CARDPVETTDYGMDVW	in-frame	160	0	0	0	0	0	160	0	0	0	0
IGHV3-49	F	x	x	IGHJ4	F	IGHG2	F	CARWTVWQVLDCW	in-frame	160	160	0	0	0	0	0	0	0	0	0
IGHV3-48	F	x	x	IGHJ4	F	IGHG2	F	CATRRDHGDFGRGVCDFW	in-frame	160	160	0	0	0	0	0	0	0	0	0
IGHV3-23D	F	x	x	IGHJ5	F	IGHG1	F	CAKDLLVHGGCVADW	in-frame	160	0	0	0	0	0	0	160	0	0	0
IGHV3-11	F	IGHD5/OR15-5b,IGHD5/OR15-5a	ORF	IGHJ3	F	IGHG1	F	CARHYLVSTITWHFFDIW	in-frame	160	0	0	0	0	0	160	0	0	0	0
IGHV1-2	F	x	x	IGHJ6	F	IGHG1	F	CARDKAVLPVYYAMDVW	in-frame	160	0	0	0	0	0	0	0	160	0	0
IGHV5-51	F	x	x	IGHJ3	F	IGHG1	F	CARPPFSSSYDAFEMW	in-frame	159	0	0	0	0	0	159	0	0	0	0
IGHV4-61,IGHV4-38-2,IGHV4-30-2	F	IGHD2-21	F	IGHJ3	F	IGHG4	F	CARECGGGCFDALDIW	in-frame	159	0	0	0	0	0	0	0	0	159	0
IGHV4-59,IGHV4-61	F	x	x	IGHJ5	F	IGHG1	F	CSRSTGIYVPNVWFDPW	in-frame	159	0	0	0	0	0	0	0	0	159	0
IGHV4-30-4	F	IGHD2-15	F	IGHJ3	F	IGHG1	F	CARERGFCNGGSCYLGAIDIW	in-frame	159	0	159	0	0	0	0	0	0	0	0
IGHV3-9	F	x	x	IGHJ4	F	IGHG1	F	CAKVRSGYSLDYW	in-frame	159	0	0	159	0	0	0	0	0	0	0
IGHV3-9	F	x	x	IGHJ2	F	IGHG1	F	CAKKWAPVVTPDWYLDAW	in-frame	159	0	0	0	0	0	0	0	0	159	0
IGHV3-74	F	x	x	IGHJ3	F	IGHG1	F	CARDGIDYRAFDVW	in-frame	159	0	0	0	0	0	0	0	0	159	0
IGHV3-48	F	x	x	IGHJ3	F	IGHG1	F	CARGRLRTALDIW	in-frame	159	0	0	159	0	0	0	0	0	0	0
IGHV3-20	ORF	IGHD3-3	F	IGHJ4	F	IGHG2	F	CARAPRVTIFGAAFDW	in-frame	159	0	0	0	0	0	0	0	0	0	159
IGHV3-15	F	x	x	IGHJ5,IGHJ4	F	IGHG2	F	CTDPRWATWPAW	in-frame	159	0	0	0	159	0	0	0	0	0	0
IGHV3-15	F	x	x	IGHJ5	F	IGHG2	F	CTTDISHSRGYYDGVGQW	in-frame	159	0	0	0	0	0	0	159	0	0	0
IGHV2-70,IGHV2-5	F	IGHD3-9	F	IGHJ3	F	IGHG1	F	CAHRAAPHYDILTGSYTRHDSFHVW	in-frame	159	0	0	0	159	0	0	0	0	0	0
IGHV1-46	F	x	x	IGHJ5,IGHJ4	F	IGHG2	F	CARERGGTAMDVW	in-frame	159	0	0	0	0	0	159	0	0	0	0
IGHV6-1	F	x	x	IGHJ4	F	IGHG1	F	CAREVASGILWHIFDYW	in-frame	158	0	0	0	0	158	0	0	0	0	0
IGHV4-39	F	x	x	IGHJ5	F	IGHG3	F	CARRVPNDLGDYAEWFHPW	in-frame	158	0	158	0	0	0	0	0	0	0	0
IGHV4-39	F	IGHD2/OR15-2b,IGHD2/OR15-2a	ORF	IGHJ4	F	IGHG2	F	CARHIHNGGYEYYFDYW	in-frame	158	0	0	0	0	0	158	0	0	0	0
IGHV3-9	F	IGHD3-10	F	IGHJ3	F	IGHG1	F	CAKAYLYGSGRVDIFHVW	in-frame	158	0	0	0	0	0	158	0	0	0	0
IGHV3-74	F	x	x	IGHJ6	F	IGHG2	F	CAGSDLTDYPIMGYYYYGMDVW	in-frame	158	0	0	0	158	0	0	0	0	0	0
IGHV3-74	F	IGHD6-13	F	IGHJ4	F	IGHG1	F	CARDAYSSSYYVLLYW	in-frame	158	0	0	0	0	0	0	0	0	158	0
IGHV3-49	F	IGHD3-3	F	IGHJ4	F	IGHG1	F	CTRDSRGIFGVIMIGAFDCW	in-frame	158	0	0	0	0	0	0	0	0	158	0
IGHV3-49	F	IGHD2/OR15-2b,IGHD2/OR15-2a	ORF	IGHJ1	F	IGHG2	F	CTTYYSSNWYDFQHW	in-frame	158	158	0	0	0	0	0	0	0	0	0
IGHV3-25	P	x	x	IGHJ6	F	IGHG1	F	CTRVRESWNLLWGYYNYGMDVW	in-frame	158	0	0	0	0	0	158	0	0	0	0
IGHV3-23D	F	x	x	IGHJ4	F	IGHG2	F	CVKSFSTIWPTLNFDYW	in-frame	158	0	0	158	0	0	0	0	0	0	0
IGHV3-23D	F	IGHD4-17	F	IGHJ6	F	IGHG1	F	CAKHHIDGDYDYYFMDVW	in-frame	158	0	0	0	0	0	0	0	158	0	0
IGHV3-23D	F	IGHD2-2	F	IGHJ6	F	IGHG1	F	CAKDRLPHYCSSNSCYGVMDVW	in-frame	158	0	0	0	0	0	0	158	0	0	0
IGHV3-23D	F	IGHD1-26	F	IGHJ4	F	IGHG2	F	CAKVAVAWELPNYYFDYW	in-frame	158	0	0	0	0	0	0	158	0	0	0
IGHV3-15	F	IGHD5-24	ORF	IGHJ4	F	IGHG1	F	CTTDRDGYNYFDYW	in-frame	158	0	0	0	0	0	158	0	0	0	0
IGHV1-18	F	x	x	IGHJ4	F	IGHG1	F	CARDRSYDSYGLYSRYSDNW	in-frame	158	0	158	0	0	0	0	0	0	0	0
IGHV7-4-1	F	IGHD3-22	F	IGHJ6	F	IGHG1	F	CARDVDSSGYHYYYGMDVW	in-frame	157	0	0	0	0	0	0	0	0	157	0
IGHV4-4,IGHV4-39	F	x	x	IGHJ5	F	IGHG1	F	CVRVFWSGRLQDRFDPW	in-frame	157	0	0	0	0	0	0	0	0	157	0
IGHV4-34	F	x	x	IGHJ5	F	IGHG2	F	CSRGQDRSKSGDSW	in-frame	157	0	0	0	0	0	0	0	157	0	0
IGHV3-NL1,IGHV3-30-5,IGHV3-30-3,IGHV3-30	F	x	x	IGHJ6	F	IGHG1	F	CAKKRSYSNYYYYFDMDVW	in-frame	157	0	0	0	0	0	157	0	0	0	0
IGHV3-74	F	IGHD6-13	F	IGHJ5	F	IGHG1	F	CARVGRYSSSRFDPW	in-frame	157	157	0	0	0	0	0	0	0	0	0
IGHV3-7,IGHV3-69-1,IGHV3-48	F	x	x	IGHJ4	F	IGHG1	F	CARARNDDLWSGLDYW	in-frame	157	0	0	0	0	0	0	0	0	157	0
IGHV3-49	F	x	x	IGHJ4	F	IGHG2	F	CTRGGGAGASPHYW	in-frame	157	157	0	0	0	0	0	0	0	0	0
IGHV3-48	F	x	x	IGHJ3	F	IGHG1	F	CARGNADTGFYPGDGFDFW	in-frame	157	0	0	0	0	0	157	0	0	0	0
IGHV3-33,IGHV3-23D,IGHV3-23	F	IGHD3-10	F	IGHJ4	F	IGHG2	F	CAKSDGSGSYDDFW	in-frame	157	0	0	0	0	0	0	0	0	157	0
IGHV3-23D	F	x	x	IGHJ4	F	IGHG2	F	CAKTLWSGEFLFKGPFDYW	in-frame	157	0	0	0	0	0	0	157	0	0	0
IGHV3-15	F	x	x	IGHJ4	F	IGHG2	F	CTRLLYYDYW	in-frame	157	0	0	0	0	0	157	0	0	0	0
IGHV1-69D	F	x	x	IGHJ3	F	IGHG1	F	CAREGRRAAGHDAIDIW	in-frame	157	0	0	0	0	0	0	157	0	0	0
IGHV3-7,IGHV3-69-1,IGHV3-48,IGHV3-21	F	IGHD2-2	F	IGHJ6	F	IGHG1	F	CARVRVVPAAENYYYGMDVW	in-frame	156	0	156	0	0	0	0	0	0	0	0
IGHV3-7	F	x	x	IGHJ5,IGHJ4	F	IGHG1	F	CARERRGYYDN*W	out-of-frame	156	0	0	0	0	156	0	0	0	0	0
IGHV3-33	F	IGHD2-2	F	IGHJ5	F	IGHG3	F	CARGGYCSSTSCSRSWFDPW	in-frame	156	0	0	0	0	0	0	0	0	156	0
IGHV3-23D	F	IGHD3-10	F	IGHJ4	F	IGHG2	F	CVKARGSGSHREYHFDYW	in-frame	156	0	0	0	0	156	0	0	0	0	0
IGHV3-15	F	IGHD1-26	F	IGHJ4	F	IGHG2	F	CTAIVGAYDVWDYW	in-frame	156	0	0	0	0	0	156	0	0	0	0
IGHV1-8	F	IGHD3-10	F	IGHJ1	F	IGHG1	F	CARARYYGSGSFSILQHW	in-frame	156	0	0	0	0	0	0	0	0	156	0
IGHV1-46	F	IGHD5-12	F	IGHJ4	F	IGHG2	F	CARGVHSGYDFYDW	in-frame	156	0	0	0	0	0	156	0	0	0	0
IGHV1-18	F	x	x	IGHJ5	F	IGHG1	F	CARDGELQRNWFDPW	in-frame	156	0	0	0	0	0	0	0	156	0	0
IGHV1-18	F	x	x	IGHJ3	F	IGHG2	F	CVRDFLQYGGGRWDDTFDIW	in-frame	156	0	0	0	0	0	156	0	0	0	0
IGHV4-61	F	IGHD2-15	F	IGHJ4	F	IGHG1	F	CAREGGYCSGGRCHSVDYW	in-frame	155	0	0	0	155	0	0	0	0	0	0
IGHV4-4,IGHV4-39	F	x	x	IGHJ4	F	IGHG1	F	CARGPSYTPVVIRPRYFDSW	in-frame	155	0	0	0	0	0	0	155	0	0	0
IGHV3-9	F	IGHD6-19	F	IGHJ4	F	IGHG1	F	CAKDSSGWSRLKT**W	out-of-frame	155	0	0	0	0	0	155	0	0	0	0
IGHV3-7	F	x	x	IGHJ4	F	IGHG1	F	CVRSKVITSFDYW	in-frame	155	0	0	0	0	155	0	0	0	0	0
IGHV3-64,IGHV3-64D	F	x	x	IGHJ5,IGHJ4	F	IGHG1	F	CLGRIAELFW	in-frame	155	0	0	0	0	0	0	155	0	0	0
IGHV3-49	F	IGHD5-24	ORF	IGHJ4	F	IGHG1	F	CTRGRLESATITAAGYW	in-frame	155	0	0	0	0	0	0	155	0	0	0
IGHV3-23D	F	x	x	IGHJ6	F	IGHG1	F	CAKDLTAHFYATGSFLRVAGMDVW	in-frame	155	0	0	0	0	155	0	0	0	0	0
IGHV3-15	F	x	x	IGHJ4	F	IGHG2	F	CVMDLPGNSPGIDNW	in-frame	155	0	0	0	0	0	0	0	0	155	0
IGHV3-15	F	IGHD3-10	F	IGHJ6	F	IGHG4	F	CATDVTMVRGAVPGRFQYYMDVW	in-frame	155	0	0	0	0	0	0	155	0	0	0
IGHV2-70,IGHV2-5	F	x	x	IGHJ6	F	IGHG4	F	CVRLNSTAGVDVW	in-frame	155	0	0	0	0	0	0	0	0	0	155
IGHV2-70	F	x	x	IGHJ4	F	IGHG2	F	CARILHYHDTRGFSHYFDCW	in-frame	155	0	0	0	0	0	155	0	0	0	0
IGHV7-4-1	F	IGHD2-15	F	IGHJ4	F	IGHG2	F	CAREDFTCAGGSCYFDCW	in-frame	154	0	0	0	154	0	0	0	0	0	0
IGHV4/OR15-8	ORF	x	x	IGHJ5	F	IGHG2	F	CTSWKDYFGLEKDSW	in-frame	154	0	0	0	0	0	0	154	0	0	0
IGHV4-61,IGHV4-59	F	x	x	IGHJ4	F	IGHG1	F	CARTDGSLDYW	in-frame	154	0	154	0	0	0	0	0	0	0	0
IGHV4-34,IGHV4-31	F	x	x	IGHJ4	F	IGHG2	F	CTTWKDYYALWKDYW	in-frame	154	0	0	0	0	0	0	154	0	0	0
IGHV3-9	F	x	x	IGHJ5,IGHJ4	F	IGHG2	F	CVKDMFAGIGPGEHW	in-frame	154	154	0	0	0	0	0	0	0	0	0
IGHV3-9	F	x	x	IGHJ4	F	IGHG2	F	CAKASGDQLLLDFDYW	in-frame	154	0	0	154	0	0	0	0	0	0	0
IGHV3-7	F	IGHD5-12	F	IGHJ3	F	IGHG2	F	CASGVDILATYAFDIW	in-frame	154	0	0	0	0	154	0	0	0	0	0
IGHV3-49	F	x	x	IGHJ4	F	IGHG1	F	CVRSRGSPHGIFDLW	in-frame	154	0	0	0	0	0	0	154	0	0	0
IGHV3-23D	F	x	x	IGHJ4	F	IGHG2	F	CAKYDESMYYFDHW	in-frame	154	0	0	0	0	0	0	0	0	154	0
IGHV3-11	F	IGHD2-21	F	IGHJ3	F	IGHG2	F	CASFRSSVVTESPFDLW	in-frame	154	0	0	0	0	0	154	0	0	0	0
IGHV2-5	F	x	x	IGHJ4	F	IGHG4	F	CAHNRLFDFW	in-frame	154	0	0	154	0	0	0	0	0	0	0
IGHV1/OR15-9	ORF	x	x	IGHJ4	F	IGHG1	F	CANCKRHREYGDYAFDSW	in-frame	154	0	0	0	0	0	0	0	154	0	0
IGHV1-3	F	x	x	IGHJ4	F	IGHG2	F	CARGHDGTFDIW	in-frame	154	0	0	0	0	0	0	0	0	154	0
IGHV1-18	F	x	x	IGHJ6	F	IGHG2	F	CARDVRYLMDVW	in-frame	154	0	0	0	0	0	0	154	0	0	0
IGHV1-18	F	IGHD2-2	F	IGHJ2	F	IGHG2	F	CVKDCCRYCPATSCYGGNFYLDFW	in-frame	154	0	0	0	0	0	0	154	0	0	0
IGHV7-4-1	F	IGHD2-15	F	IGHJ4	F	IGHG2	F	CAREDFTCSGGTCYFDYW	in-frame	153	0	0	0	153	0	0	0	0	0	0
IGHV4-39	F	IGHD4-23	ORF	IGHJ4	F	IGHG1	F	CARHVPPNYGGNWGSW	in-frame	153	0	0	0	0	0	0	153	0	0	0
IGHV4-34,IGHV4-31	F	IGHD3-10	F	IGHJ4	F	IGHG4	F	CARGRRFGSGTSLANW	in-frame	153	0	0	0	0	0	153	0	0	0	0
IGHV3-NL1,IGHV3-64D	F	x	x	IGHJ4	F	IGHG2	F	CVKDIGWSRGMGGQSLDNW	in-frame	153	0	0	0	0	0	153	0	0	0	0
IGHV3-74	F	x	x	IGHJ4	F	IGHG2	F	CARGNGSNTAFDYW	in-frame	153	0	0	0	0	0	153	0	0	0	0
IGHV3-64	F	IGHD2-8	F	IGHJ4	F	IGHG1	F	CARGYCTGGNCYAFFDYW	in-frame	153	0	0	0	0	0	153	0	0	0	0
IGHV3-53	F	x	x	IGHJ4	F	IGHG1	F	CVRDLATGTSPSLSDFW	in-frame	153	0	0	0	0	0	153	0	0	0	0
IGHV3-23D	F	x	x	IGHJ4	F	IGHG2	F	CAKDTVLIA.WWPPFFDYW	out-of-frame	153	0	0	0	0	0	0	0	153	0	0
IGHV1/OR15-3	P	x	x	IGHJ5	F	IGHG2	F	CARDLSNIRIDSWWLDPW	in-frame	153	0	0	0	0	0	0	153	0	0	0
IGHV1-3	F	x	x	IGHJ6	F	IGHG4	F	CARDFRIGYSSSWTDYYYYGMDVW	in-frame	153	0	0	0	0	0	153	0	0	0	0
IGHV1-18	F	x	x	IGHJ4	F	IGHG1	F	CARALVVSYAGDDLTPLEINYW	in-frame	153	0	0	0	0	0	0	153	0	0	0
IGHV4-59	F	x	x	IGHJ5	F	IGHG2	F	CARGRGALAPW	in-frame	152	152	0	0	0	0	0	0	0	0	0
IGHV4-39	F	x	x	IGHJ5	F	IGHG1	F	CARGEDPVLQVSTWGGVIGHPTWFDPW	in-frame	152	0	0	0	0	0	0	0	0	152	0
IGHV4-34	F	x	x	IGHJ5	F	IGHG1	F	CARGYGSGFGRFDPW	in-frame	152	0	0	152	0	0	0	0	0	0	0
IGHV3-73	F	x	x	IGHJ6	F	IGHG1	F	CARRASTSGSLWGLWEFYYYGMDVW	in-frame	152	0	0	0	0	0	152	0	0	0	0
IGHV3-64	F	x	x	IGHJ5,IGHJ4	F	IGHG1	F	CLGRIAELFW	in-frame	152	0	0	0	0	0	0	152	0	0	0
IGHV3-53	F	x	x	IGHJ4	F	IGHG2	F	CGRGQIVGVRGNYW	in-frame	152	0	0	0	152	0	0	0	0	0	0
IGHV3-49	F	IGHD6-19	F	IGHJ1	F	IGHG2	F	CTTYYSSAWYVFQHW	in-frame	152	152	0	0	0	0	0	0	0	0	0
IGHV3-49	F	IGHD3-16	F	IGHJ4	F	IGHG2	F	CIRWENDQSYAYYW	in-frame	152	152	0	0	0	0	0	0	0	0	0
IGHV3-33	F	x	x	IGHJ6	F	IGHG2	F	CGKSGYYWLREYYYYGMNVW	in-frame	152	0	0	152	0	0	0	0	0	0	0
IGHV3-23D	F	x	x	IGHJ6	F	IGHG1	F	CAKRDDYYYHGMDVW	in-frame	152	0	0	0	0	0	0	0	0	152	0
IGHV3-11	F	IGHD3-10	F	IGHJ5	F	IGHG3	F	CARGTSVWFGELLNWFDSW	in-frame	152	0	0	0	0	0	0	152	0	0	0
IGHV1-46	F	x	x	IGHJ4	F	IGHG2	F	CLRDVFGSADHW	in-frame	152	152	0	0	0	0	0	0	0	0	0
IGHV5-51	F	IGHD3-22	F	IGHJ4	F	IGHG1	F	CARLETFYYDSSGFFDYW	in-frame	151	0	0	151	0	0	0	0	0	0	0
IGHV4-4	F	IGHD3-22	F	IGHJ4	F	IGHG1	F	CASPSSGYFSFDYW	in-frame	151	0	0	0	0	0	0	151	0	0	0
IGHV4-34,IGHV4-31	F	IGHD3-9	F	IGHJ5	F	IGHG1	F	CARGNDILTGHSLW	in-frame	151	151	0	0	0	0	0	0	0	0	0
IGHV3-NL1,IGHV3-30-5,IGHV3-30-3,IGHV3-30	F	IGHD3-22	F	IGHJ4	F	IGHG1	F	CAKEADSSGFHHPLELDYW	in-frame	151	0	0	0	0	0	0	151	0	0	0
IGHV3-73	F	x	x	IGHJ4	F	IGHG2	F	CTRGMVYW	in-frame	151	0	0	0	0	0	0	0	0	151	0
IGHV3-48	F	x	x	IGHJ5,IGHJ4	F	IGHG1	F	CASASGGPVAGW	in-frame	151	0	151	0	0	0	0	0	0	0	0
IGHV3-33	F	x	x	IGHJ4	F	IGHG1	F	CARDYDVVVPTYFFEHW	in-frame	151	0	151	0	0	0	0	0	0	0	0
IGHV3-23D	F	x	x	IGHJ5	F	IGHG2	F	CAKCFSEGARPESW	in-frame	151	0	0	0	151	0	0	0	0	0	0
IGHV2-70	F	x	x	IGHJ5	F	IGHG1	F	CARIPCYGGTFEGSW	in-frame	151	0	0	0	0	0	0	0	0	151	0
IGHV2-5	F	x	x	IGHJ3	F	IGHG2	F	CAYRVVPRSRTAQSWSAFDIW	in-frame	151	0	0	0	0	0	0	0	151	0	0
IGHV2-5	F	IGHD3-10	F	IGHJ6	F	IGHG1	F	CAHRRGNYYGSENHYYHGMDVW	in-frame	151	0	0	0	0	0	0	0	151	0	0
IGHV1-18	F	x	x	IGHJ6	F	IGHG2	F	CARDGVYKDHFYYYGMDVW	in-frame	151	0	0	0	151	0	0	0	0	0	0
IGHV7-4-1	F	IGHD6-13	F	IGHJ5	F	IGHG1	F	CARDRGGSSWSWFDPW	in-frame	150	0	0	0	0	0	0	150	0	0	0
IGHV6-1	F	x	x	IGHJ4	F	IGHG2	F	CATRYFDHW	in-frame	150	150	0	0	0	0	0	0	0	0	0
IGHV4-30-4	F	x	x	IGHJ4	F	IGHG2	F	CARDRGGDSRPFDYW	in-frame	150	0	150	0	0	0	0	0	0	0	0
IGHV3-NL1	F	IGHD5-5,IGHD5-18	F	IGHJ4	F	IGHG2	F	CAKPTLGGGYSYLIDYW	in-frame	150	0	0	0	0	150	0	0	0	0	0
IGHV3-9	F	x	x	IGHJ5	F	IGHG2	F	CVKDVFAGIGPGGSW	in-frame	150	150	0	0	0	0	0	0	0	0	0
IGHV3-9	F	IGHD3-10	F	IGHJ3	F	IGHG1	F	CARETYYGSGSYYRDGFDLW	in-frame	150	0	0	0	0	0	150	0	0	0	0
IGHV3-7,IGHV3-69-1,IGHV3-48,IGHV3-21	F	x	x	IGHJ6	F	IGHG2	F	CTRDPVTWLRRGHMDVW	in-frame	150	0	0	0	0	0	0	0	0	150	0
IGHV3-64,IGHV3-30-3,IGHV3-30	F	x	x	IGHJ5	F	IGHG2	F	CARDLSGTGSSNWYIRGGFDPW	in-frame	150	0	150	0	0	0	0	0	0	0	0
IGHV3-48	F	x	x	IGHJ4	F	IGHG1	F	CARDRRMASLREYERLHFW	in-frame	150	0	0	0	0	0	0	0	0	150	0
IGHV3-23D	F	x	x	IGHJ4	F	IGHG2	F	CAKSDWEGTRPGKYW	in-frame	150	0	0	0	0	0	0	150	0	0	0
IGHV3-23D	F	x	x	IGHJ4	F	IGHG2	F	CAKCRKSYGDDSFDYW	in-frame	150	0	0	0	0	150	0	0	0	0	0
IGHV3-23D	F	x	x	IGHJ3	F	IGHG2	F	CARVFGSGSQSGLNAFDVW	in-frame	150	0	0	0	0	150	0	0	0	0	0
IGHV3-15	F	x	x	IGHJ3	F	IGHG1	F	CTTEGKGGGAFDIW	in-frame	150	0	0	0	0	150	0	0	0	0	0
IGHV3-15	F	IGHD3-22	F	IGHJ4	F	IGHG1	F	CTSVVRYYDSTNYPRYW	in-frame	150	0	0	150	0	0	0	0	0	0	0
IGHV3-13	F	x	x	IGHJ5	F	IGHG2	F	CASGLRGWDLW	in-frame	150	0	0	0	0	0	0	0	150	0	0
IGHV1-69D	F	x	x	IGHJ5,IGHJ4	F	IGHG2	F	CVKARKSYYNFGLDHW	in-frame	150	0	0	0	0	0	0	150	0	0	0
IGHV1-3	F	x	x	IGHJ4	F	IGHG2	F	CAREWWVDSHFDYW	in-frame	150	0	0	0	0	0	0	0	0	150	0
IGHV1-18	F	x	x	IGHJ3	F	IGHG1	F	CASEVAAGVGGLDIW	in-frame	150	0	0	0	0	0	0	0	150	0	0
IGHV4-59	F	x	x	IGHJ2	F	IGHG1	F	CARGADSFWATADSGGWYFDLW	in-frame	149	0	0	0	0	0	0	149	0	0	0
IGHV4-39	F	IGHD6-19	F	IGHJ4	F	IGHG1	F	CVRQWSSGWYNFDYW	in-frame	149	0	0	0	0	0	0	0	0	149	0
IGHV4-30-4	F	x	x	IGHJ4,IGHJ5	F	IGHG2	F	CARLRGSGIYQLDLW	in-frame	149	0	0	0	0	149	0	0	0	0	0
IGHV3-74	F	x	x	IGHJ6	F	IGHG1	F	CIRGQTYFYHYGLEVW	in-frame	149	0	0	149	0	0	0	0	0	0	0
IGHV3-49	F	x	x	IGHJ6	F	IGHG2	F	CTRDRGTRDYGMEVW	in-frame	149	0	0	0	0	0	0	0	149	0	0
IGHV3-33,IGHV3-30	F	x	x	IGHJ2	F	IGHG2	F	CARARADWSLDLW	in-frame	149	0	0	149	0	0	0	0	0	0	0
IGHV3-33	F	x	x	IGHJ6	F	IGHG2	F	CAKAFMVWGVSLDVW	in-frame	149	0	0	0	0	0	0	0	0	149	0
IGHV3-33	F	x	x	IGHJ4	F	IGHG1	F	CAKGNYFGSGLIEAFDYW	in-frame	149	0	0	0	0	0	0	0	0	149	0
IGHV3-23D	F	x	x	IGHJ4	F	IGHG2	F	CAKNKQDGYPFYDYW	in-frame	149	0	0	0	0	0	0	149	0	0	0
IGHV1-8	F	IGHD2-15	F	IGHJ4	F	IGHG1	F	CARGYCSGGSCSSTRSFDYW	in-frame	149	149	0	0	0	0	0	0	0	0	0
IGHV1-18	F	x	x	IGHJ6	F	IGHG2	F	CARDRDWLGALWDHNGMDVW	in-frame	149	0	0	0	0	0	149	0	0	0	0
IGHV1-18	F	x	x	IGHJ5	F	IGHG4	F	CARNPYFYGSGTLNWLDPW	in-frame	149	0	149	0	0	0	0	0	0	0	0
IGHV7-4-1	F	IGHD2-15	F	IGHJ4	F	IGHG1	F	CARARGYCSSGSCYFDYW	in-frame	148	148	0	0	0	0	0	0	0	0	0
IGHV4-61,IGHV4-59	F	x	x	IGHJ6	F	IGHG1	F	CARDRYGGYEADYYYYYMDVW	in-frame	148	0	0	0	0	0	0	148	0	0	0
IGHV4-61,IGHV4-59	F	x	x	IGHJ2	F	IGHG2	F	CARTPDDSKRGWYFDLW	in-frame	148	0	0	148	0	0	0	0	0	0	0
IGHV4-39	F	x	x	IGHJ5	F	IGHG1	F	CARVTATWYEVLWFDPW	in-frame	148	0	0	0	0	0	0	0	0	148	0
IGHV4-39	F	IGHD6-19	F	IGHJ4	F	IGHG1	F	CARDSGIGVVGTSGHFDFW	in-frame	148	0	0	0	0	0	0	0	0	148	0
IGHV4-34,IGHV4-31	F	x	x	IGHJ5	F	IGHG4	F	CARLDPSGNWFDPW	in-frame	148	0	0	148	0	0	0	0	0	0	0
IGHV3-NL1,IGHV3-66	F	IGHD3-22	F	IGHJ4	F	IGHG1	F	CAKEALSGDYYDSSGPADYW	in-frame	148	0	0	148	0	0	0	0	0	0	0
IGHV3-9	F	x	x	IGHJ3	F	IGHG4	F	CVKPYAGSLREPFDIW	in-frame	148	0	0	0	0	0	148	0	0	0	0
IGHV3-74	F	x	x	IGHJ4	F	IGHG1	F	CAGGGGRGLAYW	in-frame	148	148	0	0	0	0	0	0	0	0	0
IGHV3-7	F	x	x	IGHJ5	F	IGHG2	F	CARGTNLGLPNNWFDPW	in-frame	148	0	0	0	0	0	0	148	0	0	0
IGHV3-69-1,IGHV3-48	P	IGHD4-23	ORF	IGHJ4	F	IGHG2	F	CARVLYGGNTNGYFDHW	in-frame	148	0	0	0	0	0	0	0	0	148	0
IGHV3-69-1	P	x	x	IGHJ4	F	IGHG2	F	CVRDNGYNNGHHFDYW	in-frame	148	0	0	0	0	0	0	0	0	148	0
IGHV3-43	F	IGHD5/OR15-5b,IGHD5/OR15-5a,IGHD5-12	ORF	IGHJ4	F	IGHG1	F	CARDSSIRYTDYDFAFW	in-frame	148	0	0	0	0	0	0	148	0	0	0
IGHV3-33	F	IGHD3-9	F	IGHJ4	F	IGHG2	F	CVRDANTNALRYFFNWDYW	in-frame	148	0	0	0	0	0	148	0	0	0	0
IGHV3-33	F	IGHD1-26	F	IGHJ4	F	IGHG2	F	CARYRRGSYFDCW	in-frame	148	0	0	148	0	0	0	0	0	0	0
IGHV3-30	F	x	x	IGHJ3	F	IGHG1	F	CARKAYPDSWANDAFDVW	in-frame	148	0	0	0	0	0	0	0	148	0	0
IGHV3-23D	F	x	x	IGHJ4	F	IGHG2	F	CATPHFDYSIPNLPFDHW	in-frame	148	0	0	0	0	0	0	148	0	0	0
IGHV3-23D	F	x	x	IGHJ4	F	IGHG2	F	CAKASSRTCIGAICYYFDYW	in-frame	148	0	0	0	148	0	0	0	0	0	0
IGHV3-23D	F	x	x	IGHJ4	F	IGHG1	F	CAKDGSVDTSPTIHPPGSDDW	in-frame	148	0	0	0	0	0	0	0	148	0	0
IGHV3-15	F	x	x	IGHJ3	F	IGHG1	F	CATVSGSTWSLDAFDLW	in-frame	148	0	0	0	0	0	0	0	0	148	0
IGHV2-5	F	IGHD3-22	F	IGHJ4	F	IGHG2	F	CAHSFHYYDRSSYYDHFDSW	in-frame	148	0	0	0	0	0	0	0	148	0	0
IGHV1-18	F	IGHD2-21	F	IGHJ4	F	IGHG1	F	CARAPTFCGADCYTDFW	in-frame	148	0	0	0	0	0	0	148	0	0	0
IGHV7-4-1	F	x	x	IGHJ4	F	IGHG2	F	CALLPASMTTLTGDFW	in-frame	147	0	0	0	147	0	0	0	0	0	0
IGHV4-61	F	x	x	IGHJ4	F	IGHG2	F	CASRVADSTLVYYFDYW	in-frame	147	0	0	0	0	0	0	0	147	0	0
IGHV4-61	F	IGHD6-19	F	IGHJ6	F	IGHG1	F	CARDRYSSGWYGGDYYYGMDVW	in-frame	147	0	0	0	0	0	0	147	0	0	0
IGHV4-59	F	x	x	IGHJ4	F	IGHG2	F	CTEGAGWLVDYW	in-frame	147	0	0	0	0	147	0	0	0	0	0
IGHV4-34,IGHV4-31	F	x	x	IGHJ4	F	IGHG1	F	CARGTDFTSGGVYFDFW	in-frame	147	0	0	0	0	147	0	0	0	0	0
IGHV4-34,IGHV4-31	F	IGHD3-10	F	IGHJ4	F	IGHG2	F	CTSWKDYYGFEKDYW	in-frame	147	0	0	0	0	0	0	147	0	0	0
IGHV3-9	F	IGHD3/OR15-3b,IGHD3/OR15-3a,IGHD3-9	ORF	IGHJ3	F	IGHG4	F	CVKDMGTGYYPNDAFDIW	in-frame	147	0	0	0	0	0	147	0	0	0	0
IGHV3-74	F	x	x	IGHJ4	F	IGHG2	F	CVRDHPRGWFVDYW	in-frame	147	0	0	0	0	0	147	0	0	0	0
IGHV3-23D,IGHV3-23	F	x	x	IGHJ4	F	IGHG2	F	CVKDFLLARAGFFEDW	in-frame	147	0	0	0	0	147	0	0	0	0	0
IGHV3-23D	F	x	x	IGHJ4	F	IGHG2	F	CTQDSGWDHAYW	in-frame	147	0	0	0	147	0	0	0	0	0	0
IGHV3-23D	F	IGHD6-19	F	IGHJ5	F	IGHG2	F	CAICAIDVREGSSGWCNWLDPW	in-frame	147	0	0	0	0	0	0	0	0	147	0
IGHV3-15	F	x	x	IGHJ6	F	IGHG2	F	CADCLSWHGVDIW	in-frame	147	0	0	0	147	0	0	0	0	0	0
IGHV3-15	F	x	x	IGHJ4	F	IGHG2	F	CHIVNWDGDLLLGDYW	in-frame	147	0	0	0	0	0	0	147	0	0	0
IGHV3-15	F	x	x	IGHJ3	F	IGHG1	F	CSGHSSWGAFDIW	in-frame	147	0	147	0	0	0	0	0	0	0	0
IGHV3-15	F	IGHD2-15,IGHD2-21	F	IGHJ4	F	IGHG2	F	CSTDGGAGCGGGNCRLDYW	in-frame	147	0	0	0	0	0	147	0	0	0	0
IGHV1-3	F	x	x	IGHJ6	F	IGHG1	F	CAGVSWGPYFYYGMDVW	in-frame	147	0	0	0	0	0	0	147	0	0	0
IGHV1-3	F	IGHD3-10	F	IGHJ4	F	IGHG1	F	CARVLPDYSGSGSYGISPLDYW	in-frame	147	0	0	147	0	0	0	0	0	0	0
IGHV4-4,IGHV4-39	F	x	x	IGHJ4	F	IGHG2	F	CARLGHNAYW	in-frame	146	146	0	0	0	0	0	0	0	0	0
IGHV4-4	F	IGHD2-2	F	IGHJ5	F	IGHG1	F	CARDHEDIVVVPAASNWFDPW	in-frame	146	0	0	0	0	0	0	0	146	0	0
IGHV4-39	F	IGHD3-22	F	IGHJ4	F	IGHG1	F	CARDIGGLLLSAPFDYW	in-frame	146	0	0	0	0	0	0	0	0	146	0
IGHV4-34,IGHV4-31	F	x	x	IGHJ5	F	IGHG1	F	CARGEDPVLQVSTWGGVIGHPTWFDPW	in-frame	146	0	0	0	0	0	0	0	0	146	0
IGHV3-NL1,IGHV3-33,IGHV3-30-5,IGHV3-30-3	F	x	x	IGHJ6	F	IGHG2	F	CAKSGYYWLREYYYYGMNVW	in-frame	146	0	0	146	0	0	0	0	0	0	0
IGHV3-7	F	x	x	IGHJ4	F	IGHG2	F	CVTDNYGPSDNW	in-frame	146	0	0	0	146	0	0	0	0	0	0
IGHV3-7	F	x	x	IGHJ4	F	IGHG2	F	CASRKCSISACYFSSWHNFDFW	in-frame	146	0	0	0	0	0	146	0	0	0	0
IGHV3-53	F	x	x	IGHJ6	F	IGHG2	F	CARVGELAYYYYYMDVW	in-frame	146	0	0	0	0	0	0	146	0	0	0
IGHV3-48	F	x	x	IGHJ5,IGHJ4	F	IGHG1	F	CVRGATYSSSWRVDVW	in-frame	146	0	0	0	0	0	146	0	0	0	0
IGHV3-43	F	IGHD2-15	F	IGHJ6	F	IGHG1	F	CSKGGHCSGSNCYYYFGMDVW	in-frame	146	0	0	0	0	0	0	0	0	146	0
IGHV3-23D	F	x	x	IGHJ4	F	IGHG1	F	CAKDLWDFSGLDYW	in-frame	146	146	0	0	0	0	0	0	0	0	0
IGHV3-23D	F	x	x	IGHJ3	F	IGHG2	F	CAKDGGVREVDDALDIW	in-frame	146	0	146	0	0	0	0	0	0	0	0
IGHV3-23D	F	x	x	IGHJ3	F	IGHG1	F	CARVGGGAFEVAFDIW	in-frame	146	0	0	0	0	0	0	146	0	0	0
IGHV3-20	ORF	IGHD6-19	F	IGHJ2	F	IGHG1	F	CVRRGDVAVAGLNWYFDLW	in-frame	146	0	0	0	0	0	0	146	0	0	0
IGHV3-15	F	IGHD2-2	F	IGHJ4	F	IGHG1	F	CASDPMRCSGASCYGPFDYW	in-frame	146	0	0	0	0	0	0	0	0	146	0
IGHV2-5	F	IGHD6-19	F	IGHJ4	F	IGHG1	F	CAHSIAEQWLVRRYYFDYW	in-frame	146	0	0	0	0	146	0	0	0	0	0
IGHV1-3	F	IGHD5-12	F	IGHJ4	F	IGHG1	F	CARSYSGYDWSGNYW	in-frame	146	0	0	0	0	0	146	0	0	0	0
IGHV1-18	F	x	x	IGHJ3	F	IGHG1	F	CARGFEYDDGNGENGYGNGDAFDIW	in-frame	146	0	0	0	0	0	0	0	0	146	0
IGHV4-61	F	x	x	IGHJ4	F	IGHG2	F	CARNSGWYKHDYW	in-frame	145	0	0	0	0	145	0	0	0	0	0
IGHV4-34	F	x	x	IGHJ6	F	IGHG2	F	CALQFYGVFAMGVW	in-frame	145	0	0	0	0	0	0	0	0	145	0
IGHV4-34	F	x	x	IGHJ5	F	IGHG1	F	CARRQDPVTTRGVARKVNWFDPW	in-frame	145	0	0	0	0	0	0	0	0	145	0
IGHV4-34	F	x	x	IGHJ2	F	IGHG2	F	CARGQNGGVLYFDLW	in-frame	145	0	0	0	145	0	0	0	0	0	0
IGHV3-71	P	x	x	IGHJ6	F	IGHG2	F	CARDKWEGSYSYYAMDVW	in-frame	145	0	0	0	0	0	0	0	0	145	0
IGHV3-53	F	x	x	IGHJ4	F	IGHG2	F	CAREVGMGGATFDHW	in-frame	145	0	0	0	0	0	0	145	0	0	0
IGHV3-33	F	x	x	IGHJ6	F	IGHG1	F	CARGDRTYFQYYMDVW	in-frame	145	0	0	0	0	0	0	145	0	0	0
IGHV3-23D	F	x	x	IGHJ6	F	IGHG1	F	CAKVAGSREYYYYYYMDVW	in-frame	145	0	0	0	0	0	0	0	0	145	0
IGHV3-23D	F	x	x	IGHJ4	F	IGHG2	F	CAKGDQRSWYLFDDW	in-frame	145	0	0	145	0	0	0	0	0	0	0
IGHV3-15	F	x	x	IGHJ5,IGHJ4	F	IGHG1	F	CTTDLAPVHGS*W	out-of-frame	145	0	0	0	0	0	0	145	0	0	0
IGHV3-11	F	x	x	IGHJ5	F	IGHG2	F	CARSNDFRKHQFDPW	in-frame	145	0	0	0	0	0	0	0	0	145	0
IGHV7-4-1	F	x	x	IGHJ4	F	IGHG2	F	CARHDSLGRGDDYW	in-frame	144	0	0	0	0	0	0	144	0	0	0
IGHV4-61,IGHV4-59	F	x	x	IGHJ6	F	IGHG1	F	CARAPDDSGLYYYFYGLDVW	in-frame	144	0	0	0	144	0	0	0	0	0	0
IGHV3-NL1	F	x	x	IGHJ4	F	IGHG1	F	CAQGDGIIVITRFDYW	in-frame	144	0	144	0	0	0	0	0	0	0	0
IGHV3-9	F	x	x	IGHJ3	F	IGHG1	F	CAKNMGSTWLFDAFPTW	in-frame	144	0	0	0	0	0	0	144	0	0	0
IGHV3-74	F	x	x	IGHJ3	F	IGHG1	F	CVRDPGGSSSDAFDFW	in-frame	144	0	0	0	0	0	0	144	0	0	0
IGHV3-71	P	x	x	IGHJ4	F	IGHG2	F	CGRDLNWGGGYW	in-frame	144	0	0	0	0	0	0	0	144	0	0
IGHV3-43	F	IGHD6-19	F	IGHJ6	F	IGHG1	F	CAKSAFGQRLVTGYYGMDVW	in-frame	144	144	0	0	0	0	0	0	0	0	0
IGHV3-33	F	x	x	IGHJ3	F	IGHG1	F	CARDKILGTTSDALDIW	in-frame	144	0	0	0	0	0	0	144	0	0	0
IGHV3-23D	F	x	x	IGHJ4	F	IGHG2	F	CARMPWFEQPYW	in-frame	144	0	0	0	0	0	0	0	0	144	0
IGHV3-15	F	x	x	IGHJ4	F	IGHG2	F	CVWDTTTGPRYW	in-frame	144	0	0	0	0	144	0	0	0	0	0
IGHV3-13	F	x	x	IGHJ4	F	IGHG1	F	CARAMAGTYFDYW	in-frame	144	0	0	0	0	0	144	0	0	0	0
IGHV3-13	F	x	x	IGHJ2	F	IGHG1	F	CARVTGIGGSFGGLDLW	in-frame	144	0	0	0	0	0	0	144	0	0	0
IGHV2-70,IGHV2-5	F	x	x	IGHJ4	F	IGHG2	F	CAHRRDYNGNWDGGSLDYW	in-frame	144	0	0	0	0	0	0	0	0	144	0
IGHV2-70,IGHV2-5	F	IGHD3-9	F	IGHJ4	F	IGHG1	F	CAHKSYHYDPLTDSYISPPFDSW	in-frame	144	0	0	0	0	144	0	0	0	0	0
IGHV2-70	F	IGHD3-10	F	IGHJ4	F	IGHG1	F	CARNLVGYYGSGSYDYW	in-frame	144	0	0	0	0	144	0	0	0	0	0
IGHV7-4-1	F	x	x	IGHJ6	F	IGHG1	F	CARDSSTWNDGYHYGMDVW	in-frame	143	0	0	0	0	0	0	0	0	143	0
IGHV7-4-1	F	x	x	IGHJ4	F	IGHG2	F	CARDRWQWLDYW	in-frame	143	0	0	0	0	143	0	0	0	0	0
IGHV5-51	F	x	x	IGHJ4	F	IGHG1	F	CARRANMLTDKSGGFDYW	in-frame	143	0	0	0	0	0	0	0	0	143	0
IGHV4/OR15-8	ORF	IGHD6-19	F	IGHJ4	F	IGHG1	F	CARVSGKIAVAGTWDYW	in-frame	143	143	0	0	0	0	0	0	0	0	0
IGHV4-61	F	x	x	IGHJ1	F	IGHG2	F	CARLDRVPEAGAIGYFQTW	in-frame	143	0	0	0	0	0	0	0	143	0	0
IGHV4-34	F	x	x	IGHJ4	F	IGHG2	F	CTRFDYAGLSGFGFDYW	in-frame	143	0	0	0	0	0	0	143	0	0	0
IGHV3-9	F	IGHD6-13	F	IGHJ4	F	IGHG3	F	CAKSLGLAAAGAYYFDYW	in-frame	143	0	0	0	0	143	0	0	0	0	0
IGHV3-7,IGHV3-69-1,IGHV3-48,IGHV3-21	F	x	x	IGHJ4	F	IGHG2	F	CAARYQRGTYYAPLEYW	in-frame	143	0	0	0	0	0	0	143	0	0	0
IGHV3-69-1,IGHV3-48	P	x	x	IGHJ4	F	IGHG2	F	CMRESPAFESDYW	in-frame	143	0	0	0	0	0	0	0	143	0	0
IGHV3-48	F	x	x	IGHJ4	F	IGHG2	F	CARKAGGAGPPTDYFDYW	in-frame	143	0	0	0	143	0	0	0	0	0	0
IGHV3-48	F	x	x	IGHJ3	F	IGHG4	F	CATDSDFDRPPIW	in-frame	143	0	0	0	0	0	143	0	0	0	0
IGHV3-23D	F	IGHD5-12	F	IGHJ6	F	IGHG2	F	CAKEHPDDSGFVPWDGMDVW	in-frame	143	0	0	0	0	0	0	0	0	143	0
IGHV3-11	F	x	x	IGHJ3	F	IGHG1	F	CARDSTYLGNAFDIW	in-frame	143	0	0	143	0	0	0	0	0	0	0
IGHV2-5	F	x	x	IGHJ5	F	IGHG1	F	CAHSPPSPYLARNGWFDMW	in-frame	143	0	0	0	0	0	0	0	0	0	143
IGHV1-69	F	x	x	IGHJ5	F	IGHG2	F	CTRDYDWTADSW	in-frame	143	0	0	0	0	143	0	0	0	0	0
IGHV1-3	F	x	x	IGHJ4	F	IGHG1	F	CARAPYTTTHYFDYW	in-frame	143	0	0	0	0	0	0	143	0	0	0
IGHV7-4-1	F	x	x	IGHJ4	F	IGHG2	F	CARDRWQWLDFW	in-frame	142	0	0	0	0	142	0	0	0	0	0
IGHV4/OR15-8	ORF	x	x	IGHJ5	F	IGHG1	F	CARGTAALFDPW	in-frame	142	0	0	0	0	0	0	0	142	0	0
IGHV4-34	F	x	x	IGHJ5	F	IGHG1	F	CARRNWGAADPW	in-frame	142	0	0	0	0	0	0	142	0	0	0
IGHV4-34	F	x	x	IGHJ4	F	IGHG2	F	CARDRDYSGVGGAHYDSW	in-frame	142	0	142	0	0	0	0	0	0	0	0
IGHV3-7,IGHV3-69-1,IGHV3-48	F	x	x	IGHJ4	F	IGHG2	F	CTRVVEGVTGADYW	in-frame	142	0	0	0	0	0	142	0	0	0	0
IGHV3-7	F	x	x	IGHJ4	F	IGHG2	F	CAGGSGYLIEQW	in-frame	142	0	0	0	0	142	0	0	0	0	0
IGHV3-69-1,IGHV3-48	P	x	x	IGHJ4	F	IGHG2	F	CVRDNGYNNGHHFDYW	in-frame	142	0	0	0	0	0	0	0	0	142	0
IGHV3-66,IGHV3-64	F	x	x	IGHJ4	F	IGHG2	F	CARTKSDNFGDGVDFW	in-frame	142	0	0	0	0	0	0	142	0	0	0
IGHV3-53,IGHV3-33	F	x	x	IGHJ6	F	IGHG1	F	CGRDNYDFPMEVW	in-frame	142	0	0	0	0	0	0	0	142	0	0
IGHV3-53	F	IGHD3-9	F	IGHJ4	F	IGHG1	F	CARSDILTGHCAKNW	in-frame	142	0	0	0	0	0	0	142	0	0	0
IGHV3-49	F	IGHD6-13	F	IGHJ1	F	IGHG2	F	CTTYYNSRSWYTFQHW	in-frame	142	142	0	0	0	0	0	0	0	0	0
IGHV3-33	F	IGHD3-22	F	IGHJ5	F	IGHG1	F	CGKDTYDSSGLESW	in-frame	142	0	0	0	0	0	0	142	0	0	0
IGHV3-23D	F	x	x	IGHJ4	F	IGHG2	F	CAKDTETDDTQFDHW	in-frame	142	0	0	0	0	142	0	0	0	0	0
IGHV3-23D	F	x	x	IGHJ1,IGHJ4	F	IGHG2	F	CATGFTYGPHW	in-frame	142	0	0	0	0	0	142	0	0	0	0
IGHV3-23	F	x	x	IGHJ4	F	IGHG2	F	CAKDADDAPYFDYW	in-frame	142	0	0	0	0	0	0	0	142	0	0
IGHV3-11	F	x	x	IGHJ6	F	IGHG2	F	CAGGLYAHYYGMHVW	in-frame	142	0	0	142	0	0	0	0	0	0	0
IGHV2-70	F	x	x	IGHJ4	F	IGHG1	F	CAHWARGAVGMFEYW	in-frame	142	0	0	0	0	0	0	0	0	142	0
IGHV1-18	F	x	x	IGHJ5	F	IGHG2	F	CTRAAYSTSWYATW	in-frame	142	0	0	0	0	0	0	142	0	0	0
IGHV1-18	F	IGHD6-19	F	IGHJ3	F	IGHG1	F	CARDRLGVSVAGPGSGNAFHFW	in-frame	142	0	0	0	0	0	0	0	142	0	0
IGHV5-51	F	x	x	IGHJ4	F	IGHG2	F	CARQSAYSNFIDFW	in-frame	141	0	0	0	0	0	0	141	0	0	0
IGHV4-61	F	x	x	IGHJ4	F	IGHG1	F	CARSRQGLWGTAEIGFDFW	in-frame	141	0	0	0	0	0	0	0	0	141	0
IGHV4-59	F	x	x	IGHJ4	F	IGHG2	F	CTTGGGWLVNYW	in-frame	141	0	0	0	0	141	0	0	0	0	0
IGHV4-39	F	x	x	IGHJ5	F	IGHG1	F	CARRQDPVTTRGVARKVNWYDPW	in-frame	141	0	0	0	0	0	0	0	0	141	0
IGHV3-7	F	x	x	IGHJ3	F	IGHG2	F	CARDQTSSSGPGIYYDAFDVW	in-frame	141	0	0	0	0	0	141	0	0	0	0
IGHV3-53	F	x	x	IGHJ6	F	IGHG1	F	CARDLSPYYDYLTGRYFFGLDVW	in-frame	141	0	0	0	0	0	141	0	0	0	0
IGHV3-23D	F	x	x	IGHJ4	F	IGHG2	F	CARGTLDFW	in-frame	141	0	0	0	0	0	0	141	0	0	0
IGHV3-23D	F	IGHD6-13	F	IGHJ6	F	IGHG1	F	CAKDQFRSSSWYPLLYYYGMDVW	in-frame	141	0	0	0	0	0	141	0	0	0	0
IGHV3-15	F	IGHD3-10	F	IGHJ4	F	IGHG2	F	CTTALHYYGSGTYYTGYW	in-frame	141	0	141	0	0	0	0	0	0	0	0
IGHV3-13	F	IGHD6-19	F	IGHJ5	F	IGHG2	F	CATDSGGSGWDSW	in-frame	141	141	0	0	0	0	0	0	0	0	0
IGHV3-11	F	IGHD3-16	F	IGHJ4	F	IGHG1	F	CARVSMISVGGVPSAIDHW	in-frame	141	0	0	0	0	0	0	0	0	141	0
IGHV2-70,IGHV2-5	F	x	x	IGHJ5	F	IGHG1	F	CAHSLQSRMYYGSQSKQKENWFDTW	in-frame	141	0	0	0	141	0	0	0	0	0	0
IGHV1-46	F	IGHD3-22	F	IGHJ5	F	IGHG2	F	CVRVGYHHTSGYFSW	in-frame	141	0	141	0	0	0	0	0	0	0	0
IGHV1-18	F	x	x	IGHJ6	F	IGHG4	F	CARNCTTCADSGHGYYDGMDVW	in-frame	141	0	0	0	0	0	0	0	0	0	141
IGHV7-4-1	F	x	x	IGHJ3	F	IGHG2	F	CAAGVFASVPRRGPGAFDLW	in-frame	140	0	0	0	0	140	0	0	0	0	0
IGHV3-NL1	F	IGHD3-10	F	IGHJ1	F	IGHG1	F	CAQRMIRGVIIGELQNW	in-frame	140	0	140	0	0	0	0	0	0	0	0
IGHV3-73	F	x	x	IGHJ6	F	IGHG1	F	CTRRSSSGGGLWGLWDFYSKAMDIW	in-frame	140	0	0	0	0	0	140	0	0	0	0
IGHV3-72	F	x	x	IGHJ5	F	IGHG2	F	CVRARLADNWFDPW	in-frame	140	0	0	0	0	140	0	0	0	0	0
IGHV3-7	F	x	x	IGHJ4	F	IGHG2	F	CASDLALGYW	in-frame	140	0	0	0	0	0	140	0	0	0	0
IGHV3-7	F	IGHD3-22	F	IGHJ4	F	IGHG2	F	CVRDPGDDGAGWYYFDYW	in-frame	140	0	0	0	0	0	140	0	0	0	0
IGHV3-7	F	IGHD3-22	F	IGHJ3	F	IGHG2	F	CARDRNDYDSRDYYYDVFDIW	in-frame	140	0	0	0	0	0	140	0	0	0	0
IGHV3-53	F	x	x	IGHJ6	F	IGHG2	F	CATSSTHYYGLDVW	in-frame	140	0	0	0	0	140	0	0	0	0	0
IGHV3-53	F	IGHD3-22	F	IGHJ6	F	IGHG2	F	CAKALDSGGYYFERGGDVW	in-frame	140	140	0	0	0	0	0	0	0	0	0
IGHV3-48	F	x	x	IGHJ4	F	IGHG4	F	CARGIGPGLVRGVYFDSW	in-frame	140	0	0	0	0	0	140	0	0	0	0
IGHV3-30-3	F	x	x	IGHJ3	F	IGHG2	F	CARGVNGLTTDAFDIW	in-frame	140	0	0	0	0	0	0	0	0	140	0
IGHV3-23D	F	x	x	IGHJ4	F	IGHG4	F	CAKDRLLNTLDYW	in-frame	140	0	0	0	0	0	0	0	0	140	0
IGHV2-5	F	IGHD3-10	F	IGHJ4	F	IGHG2	F	CAHTASPISGSYRTIDFW	in-frame	140	140	0	0	0	0	0	0	0	0	0
IGHV1-69D	F	x	x	IGHJ4	F	IGHG2	F	CATGGRERPASYSGSGSYSYFHYW	in-frame	140	0	0	0	0	0	0	0	0	140	0
IGHV1-18	F	x	x	IGHJ4	F	IGHG2	F	CARDERRHCRGGTCYGYFDDW	in-frame	140	0	0	140	0	0	0	0	0	0	0
IGHV6-1	F	x	x	IGHJ6	F	IGHG2	F	CARDPRIYTGSSRMDVW	in-frame	139	0	0	0	0	0	139	0	0	0	0
IGHV4-61,IGHV4-59	F	x	x	IGHJ6	F	IGHG1	F	CARDWGNFGGMDVW	in-frame	139	0	0	0	0	0	0	0	0	139	0
IGHV4-34	F	x	x	IGHJ6	F	IGHG3	F	CARGGRHITVFEIVVRDYGMDVW	in-frame	139	0	0	0	0	0	0	0	139	0	0
IGHV3-33	F	IGHD2-15	F	IGHJ3	F	IGHG2	F	CARDRYCGGGSCSRDDAFDIW	in-frame	139	0	0	0	0	0	0	139	0	0	0
IGHV3-23D	F	IGHD3-9	F	IGHJ4	F	IGHG1	F	CAKGSGLRYFDWPIDYW	in-frame	139	0	0	0	0	139	0	0	0	0	0
IGHV3-20	ORF	IGHD3-10	F	IGHJ5	F	IGHG2	F	CAREDYSGSGTYWRAYDPW	in-frame	139	0	0	0	0	139	0	0	0	0	0
IGHV3-15	F	x	x	IGHJ5	F	IGHG1	F	CVNFGRTW	in-frame	139	0	0	0	0	0	0	139	0	0	0
IGHV3-13	F	IGHD3-10	F	IGHJ6	F	IGHG2	F	CARVRVWFGESYGMDVW	in-frame	139	0	139	0	0	0	0	0	0	0	0
IGHV2-70	F	x	x	IGHJ4	F	IGHG1	F	CARSAGIISQFDYW	in-frame	139	0	0	0	0	0	0	0	0	139	0
IGHV4-39	F	x	x	IGHJ4	F	IGHG4	F	CMRHGRGSYFGGDYW	in-frame	138	0	0	0	0	0	0	138	0	0	0
IGHV3/OR16-9	ORF	x	x	IGHJ4	F	IGHG2	F	CVPWGTHNYW	in-frame	138	0	0	0	0	0	0	0	138	0	0
IGHV3-74	F	x	x	IGHJ4	F	IGHG2	F	CVSHRARLGHLYYW	in-frame	138	0	0	0	0	0	0	0	0	138	0
IGHV3-74	F	IGHD3-22	F	IGHJ6	F	IGHG1	F	CARDQYYDRRGFRYYMDVW	in-frame	138	0	0	0	0	0	0	0	138	0	0
IGHV3-7	F	x	x	IGHJ4	F	IGHG1	F	CAREYYRLFTYW	in-frame	138	0	0	0	0	0	0	138	0	0	0
IGHV3-7	F	IGHD2-21	F	IGHJ4	F	IGHG1	F	CARAAHIQSCGGNCPYTYFENW	in-frame	138	138	0	0	0	0	0	0	0	0	0
IGHV3-23D	F	x	x	IGHJ4	F	IGHG2	F	CVLWAREHFDFW	in-frame	138	0	0	0	138	0	0	0	0	0	0
IGHV3-23D	F	x	x	IGHJ4	F	IGHG2	F	CAKGGVITIKDYW	in-frame	138	0	0	0	138	0	0	0	0	0	0
IGHV3-23D	F	IGHD3-10	F	IGHJ4	F	IGHG2	F	CAKDGLGSGIYYPDSW	in-frame	138	0	0	0	138	0	0	0	0	0	0
IGHV2-70,IGHV2-5	F	x	x	IGHJ5	F	IGHG1	F	CAHSRTHVAVVTTPRPTFERYNWFDPW	in-frame	138	0	0	138	0	0	0	0	0	0	0
IGHV2-5	F	x	x	IGHJ6	F	IGHG1	F	CAHRTSVKELDVW	in-frame	138	0	0	0	0	138	0	0	0	0	0
IGHV2-5	F	x	x	IGHJ3	F	IGHG2	F	CAHSSEGISRQDPFDIW	in-frame	138	0	0	0	138	0	0	0	0	0	0
IGHV1-69D	F	IGHD3-22	F	IGHJ4	F	IGHG1	F	CAREGAYDSSGYHVDYW	in-frame	138	0	0	0	0	0	0	0	0	138	0
IGHV5-10-1	F	x	x	IGHJ3	F	IGHG1	F	CARGRDISTTMVVAGSAFDIW	in-frame	137	0	0	0	0	0	0	137	0	0	0
IGHV4-61,IGHV4-59,IGHV4-4	F	IGHD3-10	F	IGHJ4	F	IGHG2	F	CVREVRVESMVQGIIGGFDNW	in-frame	137	0	137	0	0	0	0	0	0	0	0
IGHV4-61	F	IGHD3-22	F	IGHJ4	F	IGHG1	F	CARDGWLGGYYDSRKYYLGTFDSW	in-frame	137	0	0	0	0	0	0	137	0	0	0
IGHV4-59	F	IGHD3-22	F	IGHJ3	F	IGHG2	F	CARGPDYYDRNGAFVAFDVW	in-frame	137	0	0	0	0	0	0	137	0	0	0
IGHV3-NL1	F	x	x	IGHJ4	F	IGHG2	F	CANGLGTTEPLFYW	in-frame	137	0	137	0	0	0	0	0	0	0	0
IGHV3-9	F	x	x	IGHJ4	F	IGHG1	F	CVKDRDSDWYGYFDNW	in-frame	137	0	0	0	0	0	137	0	0	0	0
IGHV3-9	F	x	x	IGHJ4	F	IGHG1	F	CAKGISGYTSPFDYW	in-frame	137	0	0	0	137	0	0	0	0	0	0
IGHV3-9	F	IGHD3-22	F	IGHJ4	F	IGHG1	F	CAKSRGYYYDTSAYSFDFW	in-frame	137	0	0	0	137	0	0	0	0	0	0
IGHV3-7	F	x	x	IGHJ4	F	IGHG3	F	CARDRVYSHDSW	in-frame	137	137	0	0	0	0	0	0	0	0	0
IGHV3-49	F	x	x	IGHJ5	F	IGHG2	F	CSKLGLWGHGDSW	in-frame	137	0	0	0	0	0	0	0	137	0	0
IGHV3-23D	F	IGHD2-21	F	IGHJ5,IGHJ4	F	IGHG1	F	CAKVSSIAVVTAIRTW	in-frame	137	137	0	0	0	0	0	0	0	0	0
IGHV3-15	F	x	x	IGHJ4	F	IGHG2	F	CATTRGRGDWKYHFGYW	in-frame	137	137	0	0	0	0	0	0	0	0	0
IGHV2-70,IGHV2-5	F	x	x	IGHJ5,IGHJ4	F	IGHG2	F	CVRIYGGKGLPDHW	in-frame	137	0	0	0	0	0	0	0	137	0	0
IGHV2-5	F	x	x	IGHJ4	F	IGHG1	F	CAHGIWTGASATAILFDHW	in-frame	137	0	0	0	0	137	0	0	0	0	0
IGHV2-5	F	IGHD3-16	F	IGHJ4	F	IGHG1	F	CAHEPYHEYIWGSYLDW	in-frame	137	0	0	0	137	0	0	0	0	0	0
IGHV1-3	F	x	x	IGHJ6	F	IGHG1	F	CARFEEGLDVW	in-frame	137	0	0	0	0	0	0	0	137	0	0
IGHV1-3	F	x	x	IGHJ4	F	IGHG1	F	CTRFVVVSSTWRNFDYW	in-frame	137	0	0	0	0	0	137	0	0	0	0
IGHV4-61,IGHV4-4	F	x	x	IGHJ4	F	IGHG2	F	CARVMGMMTAVRFDLW	in-frame	136	0	0	0	0	0	0	0	0	136	0
IGHV4-61	F	x	x	IGHJ4	F	IGHG2	F	CARDAGVMGPEDYW	in-frame	136	0	0	0	136	0	0	0	0	0	0
IGHV4-59,IGHV4-4	F	x	x	IGHJ6	F	IGHG2	F	CALQTRGVFAMGVW	in-frame	136	0	0	0	0	0	0	0	0	136	0
IGHV4-59	F	IGHD6-6	F	IGHJ4	F	IGHG1	F	CARGMGVAARPGVSDYW	in-frame	136	0	0	0	0	0	0	0	136	0	0
IGHV4-34,IGHV4-31	F	x	x	IGHJ4	F	IGHG2	F	CATWKDYYGLWEDFW	in-frame	136	0	0	0	0	0	0	136	0	0	0
IGHV3-74	F	x	x	IGHJ1	F	IGHG2	F	CARGGSTYFHHW	in-frame	136	136	0	0	0	0	0	0	0	0	0
IGHV3-73	F	x	x	IGHJ4	F	IGHG2	F	CSRQTVSCHDFW	in-frame	136	0	0	0	136	0	0	0	0	0	0
IGHV3-71	P	IGHD3-10	F	IGHJ4	F	IGHG1	F	CTRPLIWYGSGSGFFDQW	in-frame	136	0	0	0	0	0	0	136	0	0	0
IGHV3-7,IGHV3-69-1,IGHV3-48	F	x	x	IGHJ4	F	IGHG2	F	CTRGSTVLNVEYW	in-frame	136	0	0	0	0	0	0	136	0	0	0
IGHV3-48	F	x	x	IGHJ4	F	IGHG2	F	CARDAGGSQQQSWFYFDY**W	out-of-frame	136	0	0	0	0	136	0	0	0	0	0
IGHV3-15	F	x	x	IGHJ5	F	IGHG2	F	CTCGMGHTDDDHW	in-frame	136	0	0	0	0	136	0	0	0	0	0
IGHV2-70	F	x	x	IGHJ4	F	IGHG2	F	CAHMSGYDFDYW	in-frame	136	0	0	0	136	0	0	0	0	0	0
IGHV1-69-2	F	x	x	IGHJ6	F	IGHG1	F	CATTRWAAASMGLYYYAMDVW	in-frame	136	0	0	0	0	0	0	0	0	136	0
IGHV4-61	F	x	x	IGHJ5,IGHJ4	F	IGHG1	F	CARGYGAV*W	out-of-frame	135	0	0	0	0	0	0	135	0	0	0
IGHV4-61	F	IGHD3-10	F	IGHJ6	F	IGHG1	F	CARALGGTVVRGWEAAQVYNGLDVW	in-frame	135	0	0	0	135	0	0	0	0	0	0
IGHV4-39	F	x	x	IGHJ5	F	IGHG1	F	CAGTSVGDLPLLGLKWFDPW	in-frame	135	0	0	0	0	0	0	135	0	0	0
IGHV4-39	F	IGHD1-26	F	IGHJ6	F	IGHG1	F	CARVNSGSYFGDSYYYMDVW	in-frame	135	0	0	0	0	0	0	0	135	0	0
IGHV4-34	F	x	x	IGHJ3	F	IGHG1	F	CARVGYVDSYGSYDAYEIW	in-frame	135	0	0	0	135	0	0	0	0	0	0
IGHV4-30-2	F	IGHD2-21	F	IGHJ3	F	IGHG2	F	CARRCGGDCSDAFDNW	in-frame	135	0	135	0	0	0	0	0	0	0	0
IGHV3/OR16-9	ORF	x	x	IGHJ4	F	IGHG1	F	CLAGYSSSGAYW	in-frame	135	135	0	0	0	0	0	0	0	0	0
IGHV3-74	F	x	x	IGHJ4	F	IGHG2	F	CGGSLSFGPEIDLW	in-frame	135	0	0	0	0	0	135	0	0	0	0
IGHV3-7,IGHV3-69-1,IGHV3-48,IGHV3-21	F	IGHD2-2	F	IGHJ6	F	IGHG1	F	CVRDEVGDIVVPYYYYYYMGVW	in-frame	135	0	0	0	0	0	0	135	0	0	0
IGHV3-7,IGHV3-69-1,IGHV3-48	F	x	x	IGHJ6	F	IGHG2	F	CARDGPTVTYARKSVMDVW	in-frame	135	0	0	0	0	0	0	0	135	0	0
IGHV3-69-1,IGHV3-48	P	x	x	IGHJ4	F	IGHG1	F	CARVYSSYFFDYW	in-frame	135	0	0	0	0	0	135	0	0	0	0
IGHV3-49	F	x	x	IGHJ6	F	IGHG1	F	CARVWGYYYSYMDVW	in-frame	135	0	0	0	0	0	0	135	0	0	0
IGHV3-49	F	x	x	IGHJ4,IGHJ1	F	IGHG2	F	CTSEGHPGTYGGDVW	in-frame	135	0	0	0	0	0	0	135	0	0	0
IGHV3-49	F	x	x	IGHJ4	F	IGHG2	F	CTRYPHVGSNPHYLEYW	in-frame	135	0	0	0	135	0	0	0	0	0	0
IGHV3-49	F	x	x	IGHJ1	F	IGHG1	F	CTTYYSTKWYVFQHW	in-frame	135	135	0	0	0	0	0	0	0	0	0
IGHV3-49	F	IGHD2-2	F	IGHJ1	F	IGHG1	F	CTTYYSSSSWYVFQRW	in-frame	135	135	0	0	0	0	0	0	0	0	0
IGHV3-48	F	x	x	IGHJ3	F	IGHG1	F	CARGRLRTALDVW	in-frame	135	0	0	135	0	0	0	0	0	0	0
IGHV3-33	F	IGHD3-10	F	IGHJ4	F	IGHG1	F	CASIYGSGSSYMFFLGEDFDYW	in-frame	135	0	135	0	0	0	0	0	0	0	0
IGHV2-5	F	x	x	IGHJ4	F	IGHG4	F	CAHRATGTDFDYW	in-frame	135	0	0	135	0	0	0	0	0	0	0
IGHV2-5	F	x	x	IGHJ4	F	IGHG1	F	CAHGEYSSNWHPFDSW	in-frame	135	135	0	0	0	0	0	0	0	0	0
IGHV1-3	F	IGHD2-2	F	IGHJ6	F	IGHG4	F	CARGGYCSRTSCFSYYDYSGLDVW	in-frame	135	0	0	0	0	0	0	0	0	135	0
IGHV1-18	F	x	x	IGHJ5	F	IGHG2	F	CVRDYDVDGVDWFDPW	in-frame	135	0	0	0	135	0	0	0	0	0	0
IGHV1-18	F	x	x	IGHJ4	F	IGHG1	F	CARDLPAHSPPDYW	in-frame	135	0	0	0	0	0	0	0	135	0	0
IGHV5-51	F	IGHD3-10	F	IGHJ4	F	IGHG1	F	CARPGLYYGPGSYYNPLEFW	in-frame	134	0	0	0	0	0	0	0	134	0	0
IGHV4-39	F	x	x	IGHJ4	F	IGHG4	F	CARNATDTSGLNFNKGFDNW	in-frame	134	0	0	134	0	0	0	0	0	0	0
IGHV4-34,IGHV4-31	F	x	x	IGHJ5	F	IGHG1	F	CARDTGKDAYSFSPFDTW	in-frame	134	0	0	0	0	0	0	0	134	0	0
IGHV4-34	F	x	x	IGHJ5	F	IGHG1	F	CARARRTFGIMGPSGGLFDSW	in-frame	134	0	0	0	0	0	0	134	0	0	0
IGHV4-34	F	x	x	IGHJ3	F	IGHG1	F	CARVLSLVVTIW	in-frame	134	0	0	0	0	0	0	134	0	0	0
IGHV4-30-4	F	x	x	IGHJ3	F	IGHG2	F	CAREVDKTSDTDAFDAW	in-frame	134	0	134	0	0	0	0	0	0	0	0
IGHV3-NL1,IGHV3-30-5,IGHV3-30-3,IGHV3-30	F	IGHD3-22	F	IGHJ4	F	IGHG2	F	CAKSYFYDSRGYPVDDYW	in-frame	134	0	0	0	0	0	0	134	0	0	0
IGHV3-72	F	x	x	IGHJ5	F	IGHG2	F	CGVWDGTKGGSW	in-frame	134	0	0	0	0	0	134	0	0	0	0
IGHV3-7,IGHV3-69-1,IGHV3-48,IGHV3-21	F	x	x	IGHJ6	F	IGHG4	F	CARTLSYRVSTGSMDVW	in-frame	134	0	0	0	0	0	134	0	0	0	0
IGHV3-33	F	x	x	IGHJ2	F	IGHG2	F	CAKFRGMVIFNWYFDVW	in-frame	134	0	0	0	0	134	0	0	0	0	0
IGHV3-23D	F	x	x	IGHJ4	F	IGHG2	F	CARRIMAYFDYW	in-frame	134	0	0	0	0	0	0	134	0	0	0
IGHV1-18	F	x	x	IGHJ6	F	IGHG1	F	CAREVLTGRYYYYYMDVW	in-frame	134	0	0	0	0	0	0	0	134	0	0
IGHV7-4-1	F	IGHD2-15	F	IGHJ4	F	IGHG2	F	CARDGRFCRGGSCYHLDFW	in-frame	133	0	0	0	0	0	0	0	0	133	0
IGHV4-61	F	x	x	IGHJ4	F	IGHG1	F	CARMIRGANDHW	in-frame	133	0	0	133	0	0	0	0	0	0	0
IGHV4-61	F	x	x	IGHJ1,IGHJ4	F	IGHG1	F	CARVLSSRLLDW	in-frame	133	133	0	0	0	0	0	0	0	0	0
IGHV3-NL1,IGHV3-30-5,IGHV3-30-3,IGHV3-30	F	x	x	IGHJ4	F	IGHG1	F	CAQGDGIIVITRFDYW	in-frame	133	0	133	0	0	0	0	0	0	0	0
IGHV3-9	F	IGHD1-26	F	IGHJ5	F	IGHG1	F	CAKDHSGSFNTFLFASW	in-frame	133	0	0	133	0	0	0	0	0	0	0
IGHV3-74	F	x	x	IGHJ4	F	IGHG1	F	CARDPEATEDW	in-frame	133	133	0	0	0	0	0	0	0	0	0
IGHV3-73	F	x	x	IGHJ5	F	IGHG1	F	CTRRLEVISNWFDPW	in-frame	133	0	0	0	0	0	0	133	0	0	0
IGHV3-72	F	x	x	IGHJ4	F	IGHG2	F	CASIRGVWGYW	in-frame	133	0	0	0	0	0	0	133	0	0	0
IGHV3-7,IGHV3-69-1,IGHV3-48,IGHV3-21	F	x	x	IGHJ2	F	IGHG2	F	CARALRSTDWYFDLW	in-frame	133	0	0	0	0	0	0	133	0	0	0
IGHV3-69-1	P	x	x	IGHJ4	F	IGHG1	F	CARSLAVLGIGFDHW	in-frame	133	0	0	0	0	0	0	0	0	133	0
IGHV3-66,IGHV3-64	F	x	x	IGHJ4	F	IGHG2	F	CAGEMGGNWRLDIDSW	in-frame	133	0	0	0	0	133	0	0	0	0	0
IGHV3-64D	F	IGHD6-13	F	IGHJ3	F	IGHG1	F	CVRLYSSTWFEAFDIW	in-frame	133	0	133	0	0	0	0	0	0	0	0
IGHV3-53,IGHV3-33	F	x	x	IGHJ4	F	IGHG1	F	CASHSESGIGSLDYW	in-frame	133	0	0	0	0	0	0	133	0	0	0
IGHV3-49	F	IGHD6-13	F	IGHJ4	F	IGHG2	F	CTREGIAAAAPYFDFW	in-frame	133	133	0	0	0	0	0	0	0	0	0
IGHV3-33,IGHV3-30	F	x	x	IGHJ6	F	IGHG1	F	CARGDRTYFQYYMDVW	in-frame	133	0	0	0	0	0	0	133	0	0	0
IGHV2-70,IGHV2-5	F	x	x	IGHJ4	F	IGHG1	F	CAQMSTIYYFDSW	in-frame	133	0	0	0	0	0	0	0	0	133	0
IGHV2-5	F	IGHD3-10	F	IGHJ4	F	IGHG2	F	CAHISNTYHYGSGTYYNFDLW	in-frame	133	0	0	0	0	133	0	0	0	0	0
IGHV6-1	F	x	x	IGHJ3	F	IGHG2	F	CARGHLNAFDVW	in-frame	132	0	0	132	0	0	0	0	0	0	0
IGHV5-51	F	x	x	IGHJ4	F	IGHG1	F	CATHHGFTSAWAYLDSW	in-frame	132	0	0	0	0	0	0	132	0	0	0
IGHV4-34,IGHV4-31	F	x	x	IGHJ4	F	IGHG1	F	CARVRHRCACPDSW	in-frame	132	132	0	0	0	0	0	0	0	0	0
IGHV3-9	F	x	x	IGHJ6	F	IGHG1	F	CVKGTSYGDLFFYGLDVW	in-frame	132	0	0	0	0	0	0	132	0	0	0
IGHV3-9	F	x	x	IGHJ4	F	IGHG3	F	CAKDIQAHMPHSGLDYW	in-frame	132	0	0	0	132	0	0	0	0	0	0
IGHV3-73	F	IGHD5-12	F	IGHJ4	F	IGHG3	F	CTSGGSDIVAYDYW	in-frame	132	0	0	0	0	132	0	0	0	0	0
IGHV3-73	F	IGHD3-9	F	IGHJ3	F	IGHG1	F	CTSQQTSRGLFDWLSGKSGALDFW	in-frame	132	0	0	0	0	0	132	0	0	0	0
IGHV3-7	F	x	x	IGHJ4	F	IGHG2	F	CARHGDRNADFW	in-frame	132	0	0	0	0	0	0	0	132	0	0
IGHV3-7	F	x	x	IGHJ4	F	IGHG2	F	CALGSGWLRFANIDYW	in-frame	132	0	0	0	132	0	0	0	0	0	0
IGHV3-53,IGHV3-33	F	x	x	IGHJ1,IGHJ4	F	IGHG2	F	CARDDCTTTSCYGHW	in-frame	132	0	0	0	0	132	0	0	0	0	0
IGHV3-49	F	x	x	IGHJ4	F	IGHG2	F	CARLSGSGDPHYFDYW	in-frame	132	0	0	0	132	0	0	0	0	0	0
IGHV3-48	F	IGHD5-5,IGHD5-18	F	IGHJ4	F	IGHG1	F	CATDGGYSYGRFDSW	in-frame	132	0	132	0	0	0	0	0	0	0	0
IGHV3-35	ORF	x	x	IGHJ4	F	IGHG2	F	CAVVNPDYW	in-frame	132	0	0	0	0	0	0	0	132	0	0
IGHV3-23D	F	x	x	IGHJ4	F	IGHG2	F	CAKDDLGGSYSDFW	in-frame	132	0	0	0	0	0	0	0	0	132	0
IGHV3-23D	F	IGHD3-3	F	IGHJ6	F	IGHG1	F	CARGPVRIFGITKYYMDVW	in-frame	132	0	0	0	0	0	0	0	0	132	0
IGHV3-11	F	x	x	IGHJ2	F	IGHG4	F	CARDPPNSNSWNWHFDLW	in-frame	132	0	0	132	0	0	0	0	0	0	0
IGHV2-70D	F	IGHD6-13	F	IGHJ6	F	IGHG1	F	CARVAAAGIWYYYGMDVW	in-frame	132	132	0	0	0	0	0	0	0	0	0
IGHV7-4-1	F	x	x	IGHJ4	F	IGHG2	F	CARHDADSDFDYW	in-frame	131	0	0	0	0	0	131	0	0	0	0
IGHV5-51	F	x	x	IGHJ4	F	IGHG2	F	CARHGITRTLASGSYDLW	in-frame	131	0	0	0	0	0	131	0	0	0	0
IGHV4-61	F	IGHD2-21	F	IGHJ6	F	IGHG2	F	CARQGCGGDCFSGIGLHHGMDVW	in-frame	131	0	0	0	131	0	0	0	0	0	0
IGHV4-4	F	x	x	IGHJ4	F	IGHG1	F	CARDATATRPDYW	in-frame	131	131	0	0	0	0	0	0	0	0	0
IGHV3-NL1	F	IGHD5-12	F	IGHJ4	F	IGHG2	F	CVTDSRYDVWTDDYFQFW	in-frame	131	0	0	0	0	0	0	0	0	131	0
IGHV3-9	F	IGHD3-10	F	IGHJ4	F	IGHG4	F	CAKDIGYYGSGSYLAYDGSGKNYFDYW	in-frame	131	0	0	0	0	0	0	0	0	131	0
IGHV3-74	F	x	x	IGHJ2	F	IGHG2	F	CTNDLS*W	out-of-frame	131	131	0	0	0	0	0	0	0	0	0
IGHV3-74	F	IGHD6-13	F	IGHJ4	F	IGHG1	F	CARESLRWSSWYDFDYW	in-frame	131	0	0	0	0	0	0	131	0	0	0
IGHV3-71	P	x	x	IGHJ6	F	IGHG1	F	CATSLASCNNGNCYNHYYYGMDVW	in-frame	131	0	0	0	0	0	131	0	0	0	0
IGHV3-71	P	x	x	IGHJ4	F	IGHG2	F	CAKDLGQRGLRFVGDFW	in-frame	131	0	0	0	0	0	0	131	0	0	0
IGHV3-7	F	x	x	IGHJ5,IGHJ4	F	IGHG2	F	CTRARQGSGAGLGFW	in-frame	131	0	0	0	0	0	0	0	0	131	0
IGHV3-7	F	x	x	IGHJ4	F	IGHG2	F	CLGGYYYEYW	in-frame	131	0	0	0	0	0	0	0	131	0	0
IGHV3-33	F	IGHD4-17	F	IGHJ4	F	IGHG1	F	CAKDDDYGDISDYW	in-frame	131	0	0	0	0	0	0	0	0	131	0
IGHV3-23D	F	x	x	IGHJ4	F	IGHG2	F	CAKGLREAATGQACLDSW	in-frame	131	0	0	0	0	0	0	131	0	0	0
IGHV3-11,IGHV3-21	F	x	x	IGHJ4	F	IGHG3	F	CVREGQQRYW	in-frame	131	0	0	0	0	0	0	0	131	0	0
IGHV3-11	F	x	x	IGHJ6	F	IGHG3	F	CASRVIVYYGMDVW	in-frame	131	131	0	0	0	0	0	0	0	0	0
IGHV2-26	F	x	x	IGHJ4	F	IGHG2	F	CARMVGYDFDYW	in-frame	131	0	0	0	131	0	0	0	0	0	0
IGHV2-26	F	IGHD3-22	F	IGHJ6	F	IGHG1	F	CARMGGVLL*DSSSYPYYYYGIDVW	out-of-frame	131	0	131	0	0	0	0	0	0	0	0
IGHV1-3	F	x	x	IGHJ4	F	IGHG2	F	CARTHSAPYDYW	in-frame	131	0	0	0	0	131	0	0	0	0	0
IGHV1-3	F	x	x	IGHJ4	F	IGHG2	F	CARAAFGNSILDYW	in-frame	131	0	131	0	0	0	0	0	0	0	0
IGHV4-39	F	x	x	IGHJ5	F	IGHG2	F	CARGTDYYKVGNLW	in-frame	130	0	0	0	0	0	0	0	130	0	0
IGHV4-39	F	IGHD6-19	F	IGHJ4	F	IGHG3	F	CARVHRIAVANWGNYFDYW	in-frame	130	0	130	0	0	0	0	0	0	0	0
IGHV4-34	F	IGHD2-2	F	IGHJ5	F	IGHG3	F	CARGLPPYRFLVSAANSWFDPW	in-frame	130	0	0	0	0	0	0	0	0	130	0
IGHV3-49	F	x	x	IGHJ4	F	IGHG2	F	CTRGFSSPHGIYDSW	in-frame	130	0	0	0	0	130	0	0	0	0	0
IGHV3-23D	F	x	x	IGHJ5,IGHJ4	F	IGHG2	F	CAKDRADSFHW	in-frame	130	130	0	0	0	0	0	0	0	0	0
IGHV3-23	F	x	x	IGHJ4	F	IGHG2	F	CARDPVGVGRPDYW	in-frame	130	0	0	0	0	0	0	130	0	0	0
IGHV3-20	ORF	x	x	IGHJ6	F	IGHG2	F	CARHAPLDFSYYYFMDVW	in-frame	130	0	0	0	0	0	0	0	0	130	0
IGHV3-15	F	IGHD2-15	F	IGHJ6	F	IGHG2	F	CTTDSNYCSGGSCYSGLYYYYYYGMDVW	in-frame	130	130	0	0	0	0	0	0	0	0	0
IGHV3-13	F	IGHD3-22	F	IGHJ3	F	IGHG1	F	CARGYYYDASGHYYGGYDMW	in-frame	130	0	0	0	0	0	0	130	0	0	0
IGHV3-11	F	x	x	IGHJ4	F	IGHG2	F	CARWNGGFDYW	in-frame	130	0	0	0	130	0	0	0	0	0	0
IGHV3-11	F	x	x	IGHJ4	F	IGHG2	F	CARGSGAHTYW	in-frame	130	0	0	0	0	130	0	0	0	0	0
IGHV1-69D	F	IGHD6-19,IGHD6-25	F	IGHJ4,IGHJ5	F	IGHG1	F	CARDRGIAASGMSLPLDTW	in-frame	130	0	0	0	0	0	0	0	130	0	0
IGHV1-3	F	x	x	IGHJ4	F	IGHG2	F	CAREKSYNYYGDYW	in-frame	130	0	0	0	0	0	0	130	0	0	0
IGHV1-18	F	x	x	IGHJ3	F	IGHG1	F	CAREQMRIGGAFDIW	in-frame	130	0	130	0	0	0	0	0	0	0	0
IGHV4-61,IGHV4-59	F	x	x	IGHJ2	F	IGHG1	F	CARVGNDYGFYWYFDLW	in-frame	129	0	0	0	0	0	129	0	0	0	0
IGHV4-61	F	IGHD3-10	F	IGHJ5	F	IGHG1	F	CARGNYGSGSYYNPSWWFDPW	in-frame	129	0	0	0	0	0	0	0	0	129	0
IGHV4-34	F	IGHD1-26	F	IGHJ3	F	IGHG2	F	CARGGNRKHRNSRIVGPNWWATPLAVW	in-frame	129	0	0	0	0	0	0	0	0	129	0
IGHV3-NL1,IGHV3-30-5,IGHV3-30-3,IGHV3-30	F	x	x	IGHJ4	F	IGHG1	F	CAKDMALIAATGTFDDW	in-frame	129	0	0	0	0	0	0	129	0	0	0
IGHV3-74	F	x	x	IGHJ4	F	IGHG2	F	CVRELLGTIAFDYW	in-frame	129	0	0	0	0	0	0	0	129	0	0
IGHV3-74	F	IGHD3-22	F	IGHJ4	F	IGHG1	F	CARDHYDSSGYCLRYW	in-frame	129	0	0	0	0	0	0	0	129	0	0
IGHV3-74	F	IGHD3-10	F	IGHJ2	F	IGHG2	F	CAREAGSGTDYNGEWYFEHW	in-frame	129	0	0	0	128	0	1	0	0	0	0
IGHV3-71	P	x	x	IGHJ4	F	IGHG1	F	CAREIGYEYGLGTGDYW	in-frame	129	0	0	0	0	0	129	0	0	0	0
IGHV3-7,IGHV3-69-1,IGHV3-48	F	x	x	IGHJ6	F	IGHG2	F	CARDKWEFSYSYYGMDVW	in-frame	129	0	0	0	0	0	0	0	0	129	0
IGHV3-64D	F	x	x	IGHJ4	F	IGHG2	F	CVKERGFGGRYFDDW	in-frame	129	0	129	0	0	0	0	0	0	0	0
IGHV3-53	F	x	x	IGHJ5	F	IGHG2	F	CGRDIGPW	in-frame	129	0	0	0	0	0	129	0	0	0	0
IGHV3-33	F	IGHD2-15	F	IGHJ6	F	IGHG2	F	CARDGYCVGGNCYSDTYYHGHDVW	in-frame	129	0	129	0	0	0	0	0	0	0	0
IGHV3-23D	F	x	x	IGHJ4	F	IGHG2	F	CTKVEERSGLITSFVDCW	in-frame	129	0	0	0	129	0	0	0	0	0	0
IGHV3-23D	F	x	x	IGHJ4	F	IGHG2	F	CAKAIAEPTGVDYW	in-frame	129	0	0	0	0	129	0	0	0	0	0
IGHV2-70D,IGHV2-70	F	IGHD3-22	F	IGHJ4	F	IGHG1	F	CARMRDAFYPDSTGHYYFDHW	in-frame	129	0	0	0	0	0	129	0	0	0	0
IGHV1-69D	F	IGHD6-19	F	IGHJ4	F	IGHG2	F	CARAGQWLGKTNYFDHW	in-frame	129	0	0	129	0	0	0	0	0	0	0
IGHV1-69	F	IGHD5/OR15-5b,IGHD5/OR15-5a	ORF	IGHJ6	F	IGHG1	F	CARGGLIVSMISPYYYYAMDVW	in-frame	129	0	0	0	0	0	129	0	0	0	0
IGHV1-46	F	x	x	IGHJ4	F	IGHG2	F	CGISPFDYW	in-frame	129	0	0	0	0	0	0	0	129	0	0
IGHV1-18	F	x	x	IGHJ4	F	IGHG4	F	CARKLRGRWTIDYW	in-frame	129	0	0	0	0	0	0	129	0	0	0
IGHV4-61,IGHV4-59	F	x	x	IGHJ2	F	IGHG1	F	CARDLRAGDHVYFDLW	in-frame	128	0	0	0	0	0	0	0	0	128	0
IGHV4-59	F	x	x	IGHJ4	F	IGHG1	F	CARGPRGSGSIHFRADSW	in-frame	128	0	0	0	0	0	0	128	0	0	0
IGHV4-34,IGHV4-31	F	x	x	IGHJ4	F	IGHG2	F	CASYVGGVFDYW	in-frame	128	0	0	0	0	0	128	0	0	0	0
IGHV4-34,IGHV4-31	F	IGHD3-10	F	IGHJ4	F	IGHG1	F	CARVDLNYYGSGSHIDYW	in-frame	128	0	0	0	0	0	0	128	0	0	0
IGHV3-NL1	F	x	x	IGHJ5	F	IGHG1	F	CAKDHLAVTTPWWDSW	in-frame	128	0	128	0	0	0	0	0	0	0	0
IGHV3-9	F	x	x	IGHJ6	F	IGHG1	F	CVKDRGPPATPFYHNYGMDVW	in-frame	128	0	0	0	128	0	0	0	0	0	0
IGHV3-9	F	IGHD3-16	F	IGHJ4	F	IGHG2	F	CTKAQNYYGRGSYHEDW	in-frame	128	0	0	0	128	0	0	0	0	0	0
IGHV3-7,IGHV3-69-1,IGHV3-48	F	x	x	IGHJ6	F	IGHG4	F	CARDLSYRVSTGSMDVW	in-frame	128	0	0	0	0	0	128	0	0	0	0
IGHV3-7	F	x	x	IGHJ4	F	IGHG2	F	CVRSKESPAPRGAGDSW	in-frame	128	0	0	0	0	128	0	0	0	0	0
IGHV3-48	F	x	x	IGHJ6	F	IGHG4	F	CARDLSYRVTTGSLDVW	in-frame	128	0	0	0	0	0	128	0	0	0	0
IGHV3-23D	F	x	x	IGHJ2	F	IGHG2	F	CAREGAYHGGYYYFDVW	in-frame	128	0	0	0	0	128	0	0	0	0	0
IGHV3-20	ORF	x	x	IGHJ5	F	IGHG2	F	CVRGGRTGTYSEALDFW	in-frame	128	0	0	0	0	0	0	0	0	128	0
IGHV3-15	F	x	x	IGHJ5	F	IGHG2	F	CATDDPRWYVAW	in-frame	128	0	128	0	0	0	0	0	0	0	0
IGHV3-11	F	x	x	IGHJ4	F	IGHG2	F	CAKAVTSAYYFDHW	in-frame	128	0	0	0	0	0	0	128	0	0	0
IGHV2-26	F	IGHD3-10	F	IGHJ6	F	IGHG1	F	CARFYYYGSGSYYTYYYYGMDVW	in-frame	128	0	0	0	128	0	0	0	0	0	0
IGHV1-8	F	x	x	IGHJ5	F	IGHG2	F	CARVIGSFVETATYKWFESW	in-frame	128	0	0	0	0	0	0	0	0	128	0
IGHV1-18	F	x	x	IGHJ6	F	IGHG1	F	CARDRLGNGLDVW	in-frame	128	0	0	0	128	0	0	0	0	0	0
IGHV4-34,IGHV4-31	F	IGHD4-17	F	IGHJ5	F	IGHG2	F	CARAPSNDYGHYGWFDPW	in-frame	127	0	0	0	127	0	0	0	0	0	0
IGHV4-34	F	x	x	IGHJ6	F	IGHG1	F	CARAVKGVIVVYHYYAMDVW	in-frame	127	0	0	0	0	0	0	0	127	0	0
IGHV4-34	F	IGHD6-19	F	IGHJ5	F	IGHG1	F	CARGGRGWYDWIDPW	in-frame	127	0	0	0	0	0	127	0	0	0	0
IGHV3-9	F	x	x	IGHJ4	F	IGHG4	F	CAKGPDYAEHFTPPFHSW	in-frame	127	127	0	0	0	0	0	0	0	0	0
IGHV3-9	F	x	x	IGHJ4	F	IGHG2	F	CIKESQPGGLDYW	in-frame	127	0	0	0	127	0	0	0	0	0	0
IGHV3-9	F	x	x	IGHJ4	F	IGHG1	F	CAKGLLLSPNVAFDSW	in-frame	127	0	0	127	0	0	0	0	0	0	0
IGHV3-66	F	IGHD3-10	F	IGHJ4	F	IGHG2	F	CAGDEGYYGSGAPDYW	in-frame	127	0	0	0	127	0	0	0	0	0	0
IGHV3-64,IGHV3-30-3,IGHV3-30	F	IGHD2-15	F	IGHJ5	F	IGHG3	F	CARDAGGYGGYCSGGSCYSGWFDPW	in-frame	127	0	127	0	0	0	0	0	0	0	0
IGHV3-23D	F	IGHD3-22	F	IGHJ5,IGHJ4	F	IGHG1	F	CAKDSPSYYYDSTGYYIRW	in-frame	127	0	0	0	0	127	0	0	0	0	0
IGHV3-23D	F	IGHD3-10	F	IGHJ2	F	IGHG1	F	CAKNPRLLLFGDLLGDYWYFDLW	in-frame	127	0	0	127	0	0	0	0	0	0	0
IGHV3-23	F	x	x	IGHJ6	F	IGHG1	F	CAKELELHPANYYMDVW	in-frame	127	0	0	0	0	0	0	0	127	0	0
IGHV3-15	F	x	x	IGHJ4	F	IGHG2	F	CTTDHSRISATVVAPFENW	in-frame	127	0	0	0	127	0	0	0	0	0	0
IGHV3-15	F	x	x	IGHJ3	F	IGHG2	F	CTTKRGFNRLHDSFDIW	in-frame	127	0	0	0	0	0	127	0	0	0	0
IGHV2-70	F	x	x	IGHJ6	F	IGHG2	F	CAHRQGSNSGHKYYYYGMDAW	in-frame	127	127	0	0	0	0	0	0	0	0	0
IGHV2-70	F	IGHD3-10	F	IGHJ5,IGHJ4	F	IGHG1	F	CGHRDRQDYYDSGSYSVW	in-frame	127	0	127	0	0	0	0	0	0	0	0
IGHV2-5	F	x	x	IGHJ4	F	IGHG2	F	CVHVRVLSAAGCGVDYW	in-frame	127	0	0	0	127	0	0	0	0	0	0
IGHV1-69D	F	IGHD2-21	F	IGHJ6	F	IGHG1	F	CARGVVVVTAGDPSFYYYGIDVW	in-frame	127	0	0	0	127	0	0	0	0	0	0
IGHV1-24	F	x	x	IGHJ5	F	IGHG1	F	CTIGPIYNDDVDWFDPW	in-frame	127	0	0	0	0	0	0	0	127	0	0
IGHV5-51	F	x	x	IGHJ4	F	IGHG4	F	CARVGAVVAVADYW	in-frame	126	0	0	0	0	126	0	0	0	0	0
IGHV4-59	F	x	x	IGHJ5	F	IGHG1	F	CARWYGGPTARFDHW	in-frame	126	0	0	0	0	0	0	126	0	0	0
IGHV4-34,IGHV4-31	F	IGHD6-19	F	IGHJ5	F	IGHG2	F	CARGDGSGWRLDSW	in-frame	126	0	0	0	0	126	0	0	0	0	0
IGHV4-34,IGHV4-31	F	IGHD3-10	F	IGHJ4	F	IGHG2	F	CTTWKDYYGLWRDYW	in-frame	126	0	0	0	0	0	0	126	0	0	0
IGHV3-74	F	x	x	IGHJ4	F	IGHG1	F	CARDFGGPRDYW	in-frame	126	126	0	0	0	0	0	0	0	0	0
IGHV3-74	F	x	x	IGHJ3	F	IGHG2	F	CARDTNYYDGTYYYDTFDIW	in-frame	126	0	0	0	0	0	126	0	0	0	0
IGHV3-71	P	x	x	IGHJ4	F	IGHG2	F	CLAGYSSSGAFW	in-frame	126	126	0	0	0	0	0	0	0	0	0
IGHV3-66	F	IGHD3-22	F	IGHJ6	F	IGHG1	F	CVLPPYSSGYYTGGGIYGMDVW	in-frame	126	126	0	0	0	0	0	0	0	0	0
IGHV3-53	F	x	x	IGHJ1	F	IGHG2	F	CARGSIRLGVTDYFHHW	in-frame	126	0	0	0	0	0	0	0	0	0	126
IGHV3-49	F	x	x	IGHJ4	F	IGHG2	F	CSPSPWLRPDSW	in-frame	126	0	0	0	0	126	0	0	0	0	0
IGHV3-49	F	IGHD6-13,IGHD3-10	F	IGHJ1	F	IGHG2	F	CTSYYNSRSWYTFQHW	in-frame	126	126	0	0	0	0	0	0	0	0	0
IGHV3-30-3	F	IGHD3-22	F	IGHJ6	F	IGHG2	F	CARDYYDRSGYRGGVDVW	in-frame	126	126	0	0	0	0	0	0	0	0	0
IGHV3-23D	F	x	x	IGHJ5	F	IGHG3	F	CARGPQFRGNSIFSWFDPW	in-frame	126	0	0	0	0	0	0	126	0	0	0
IGHV3-23D	F	x	x	IGHJ4	F	IGHG2	F	CAKSRLAAGFDYW	in-frame	126	0	0	0	0	0	0	0	126	0	0
IGHV3-23D	F	x	x	IGHJ4	F	IGHG2	F	CAKGLSAWTSCSSDYW	in-frame	126	0	0	0	0	126	0	0	0	0	0
IGHV3-23D	F	IGHD2-2	F	IGHJ4	F	IGHG2	F	CAASFTLGFCTSTSCYASRRGVDYW	in-frame	126	0	0	0	126	0	0	0	0	0	0
IGHV2-70,IGHV2-5	F	x	x	IGHJ4	F	IGHG1	F	CAHTIPDWGGYYFDYW	in-frame	126	0	0	0	0	126	0	0	0	0	0
IGHV2-5	F	IGHD7-27	F	IGHJ4	F	IGHG2	F	CAHRPNWGLWGIAYW	in-frame	126	126	0	0	0	0	0	0	0	0	0
IGHV1-3	F	x	x	IGHJ6	F	IGHG2	F	CAREGDVW	in-frame	126	0	0	0	0	126	0	0	0	0	0
IGHV5-51	F	x	x	IGHJ5	F	IGHG1	F	CAKQGGYTSTSGWIDPW	in-frame	125	0	0	0	125	0	0	0	0	0	0
IGHV4-39	F	x	x	IGHJ4	F	IGHG2	F	CARYDSDSHRRFFDYW	in-frame	125	125	0	0	0	0	0	0	0	0	0
IGHV4-39	F	x	x	IGHJ4	F	IGHG1	F	CAKGGDFGGTFCRHW	in-frame	125	0	0	0	0	0	0	0	125	0	0
IGHV4-39	F	IGHD3-3	F	IGHJ3	F	IGHG2	F	CASLLWSGSNDAFDIW	in-frame	125	0	0	0	0	0	0	0	0	125	0
IGHV3-9	F	x	x	IGHJ3	F	IGHG1	F	CARDYASAAYTAFDMW	in-frame	125	0	0	0	0	0	0	0	125	0	0
IGHV3-74	F	x	x	IGHJ4	F	IGHG2	F	CANSWGARGVDYW	in-frame	125	0	125	0	0	0	0	0	0	0	0
IGHV3-74	F	IGHD3-16	F	IGHJ5	F	IGHG2	F	CARVGDYTWGNYFNPW	in-frame	125	0	0	0	125	0	0	0	0	0	0
IGHV3-72	F	x	x	IGHJ6	F	IGHG2	F	CARGPQRGMDPDHHYHYGLDAW	in-frame	125	0	0	0	125	0	0	0	0	0	0
IGHV3-71	P	x	x	IGHJ4	F	IGHG1	F	CARDGPSDDYGDFGPFDYW	in-frame	125	0	0	0	0	0	125	0	0	0	0
IGHV3-7	F	IGHD2-21	F	IGHJ4	F	IGHG2	F	CARAGRCGDDCYFPTALDSW	in-frame	125	0	0	0	0	0	0	0	0	125	0
IGHV3-64,IGHV3-30-3,IGHV3-30	F	x	x	IGHJ4	F	IGHG2	F	CAREGRDLFGAGNYYKGLDYW	in-frame	125	0	0	0	0	0	0	0	0	125	0
IGHV3-48	F	x	x	IGHJ3	F	IGHG2	F	CARDQRWAFDTW	in-frame	125	0	0	0	125	0	0	0	0	0	0
IGHV3-33	F	IGHD6-19	F	IGHJ4	F	IGHG1	F	CATDQGSSGWYWGFDNW	in-frame	125	0	0	125	0	0	0	0	0	0	0
IGHV3-23D,IGHV3-23	F	x	x	IGHJ6	F	IGHG2	F	CAKSGYYWLREYYYYGMNVW	in-frame	125	0	0	125	0	0	0	0	0	0	0
IGHV3-23D	F	x	x	IGHJ4	F	IGHG2	F	CTKSPGGKNYFENW	in-frame	125	0	0	0	0	0	0	0	0	125	0
IGHV3-23D	F	x	x	IGHJ4	F	IGHG2	F	CATSDTPGRYFFDYW	in-frame	125	0	0	0	0	0	125	0	0	0	0
IGHV3-15	F	x	x	IGHJ5	F	IGHG2	F	CSGGRLSQWGAW	in-frame	125	0	0	0	0	125	0	0	0	0	0
IGHV3-15	F	x	x	IGHJ4	F	IGHG1	F	CVTRYFYDVNGYDDHW	in-frame	125	0	0	0	0	0	0	0	0	125	0
IGHV2-70,IGHV2-5	F	IGHD6-19	F	IGHJ4	F	IGHG1	F	CARRPGGGRSGSGWYIYFDYW	in-frame	125	0	0	0	0	0	0	0	0	125	0
IGHV1-69D	F	IGHD3-10	F	IGHJ5	F	IGHG2	F	CARAGYGSGSYHWFDPW	in-frame	125	0	0	0	0	125	0	0	0	0	0
IGHV1-46	F	IGHD1-26	F	IGHJ4	F	IGHG2	F	CARDGYSGSAGDCW	in-frame	125	0	0	0	0	0	0	125	0	0	0
IGHV1-2	F	x	x	IGHJ4	F	IGHG4	F	CATVPLTSSNWYSFQSW	in-frame	125	0	0	0	0	0	0	0	125	0	0
IGHV7-4-1	F	x	x	IGHJ3	F	IGHG3	F	CARSGAVAQGDAFDIW	in-frame	124	0	0	0	0	0	0	0	124	0	0
IGHV5-51	F	x	x	IGHJ4	F	IGHG3	F	CARVSGHYQRAPLDYW	in-frame	124	0	0	0	0	0	0	124	0	0	0
IGHV4-61	F	x	x	IGHJ6	F	IGHG1	F	CARSAAQFNLYNYYYLDVW	in-frame	124	0	0	0	0	0	0	0	0	124	0
IGHV4-61	F	x	x	IGHJ4	F	IGHG1	F	CARHSWNDGTFDYW	in-frame	124	0	0	0	0	0	0	0	0	124	0
IGHV4-59	F	IGHD3-10	F	IGHJ6	F	IGHG1	F	CARLLGERSVLWFGEAWEYYYGMDVW	in-frame	124	0	0	0	0	0	124	0	0	0	0
IGHV4-39	F	IGHD1-26	F	IGHJ4	F	IGHG1	F	CARGRDIAGARYFDYW	in-frame	124	0	0	0	124	0	0	0	0	0	0
IGHV4-34,IGHV4-31	F	IGHD3-22	F	IGHJ4	F	IGHG1	F	CARVPLGFDSSGPDYW	in-frame	124	0	0	0	0	0	0	0	0	124	0
IGHV3/OR16-9	ORF	x	x	IGHJ4	F	IGHG2	F	CGLWSYSRFDYW	in-frame	124	0	124	0	0	0	0	0	0	0	0
IGHV3-NL1,IGHV3-30-5,IGHV3-30-3,IGHV3-30	F	x	x	IGHJ6	F	IGHG1	F	CAKEKSISWNYYYYGMDVW	in-frame	124	0	0	0	0	0	0	124	0	0	0
IGHV3-9	F	IGHD3-10	F	IGHJ4	F	IGHG1	F	CAKGPDYYGSGTYYKSFEDW	in-frame	124	0	0	124	0	0	0	0	0	0	0
IGHV3-53	F	IGHD5-24	ORF	IGHJ3	F	IGHG1	F	CVREMATIRGLGAFDIW	in-frame	124	0	0	0	0	0	124	0	0	0	0
IGHV3-33	F	x	x	IGHJ6	F	IGHG1	F	CARDPHAHFVFHYMDVW	in-frame	124	0	0	0	0	0	0	0	124	0	0
IGHV3-33	F	IGHD3-10	F	IGHJ4	F	IGHG1	F	CARDGHSMDRGVIFHFDNW	in-frame	124	0	0	0	0	0	0	124	0	0	0
IGHV3-30-3,IGHV3-30	F	IGHD6-13	F	IGHJ3	F	IGHG1	F	CAREEAAAGKLSAFDIW	in-frame	124	0	0	0	0	0	0	124	0	0	0
IGHV3-23D	F	x	x	IGHJ4	F	IGHG2	F	CAKGVFTMGDYW	in-frame	124	124	0	0	0	0	0	0	0	0	0
IGHV3-23D	F	IGHD3-10	F	IGHJ6	F	IGHG1	F	CAKGCGSGTSICSYYYGLDVW	in-frame	124	0	0	0	0	0	0	0	0	124	0
IGHV3-15	F	x	x	IGHJ5	F	IGHG2	F	CTTGYPYASSIRFDPW	in-frame	124	0	0	0	0	0	0	0	124	0	0
IGHV3-15	F	IGHD6-13	F	IGHJ4	F	IGHG1	F	CTTDEIAAAGIRDYW	in-frame	124	124	0	0	0	0	0	0	0	0	0
IGHV3-15	F	IGHD3-22	F	IGHJ5,IGHJ4	F	IGHG2	F	CTTTFHSDSSGSFW	in-frame	124	124	0	0	0	0	0	0	0	0	0
IGHV3-11	F	IGHD5-12	F	IGHJ6	F	IGHG1	F	CVREDSGYNPSYYYKMDVW	in-frame	124	0	0	124	0	0	0	0	0	0	0
IGHV2-5	F	x	x	IGHJ6	F	IGHG1	F	CAHQSMMTTGGMDVW	in-frame	124	0	0	0	124	0	0	0	0	0	0
IGHV2-5	F	IGHD3-10	F	IGHJ4	F	IGHG1	F	CAHRPYSYGSGTWHFDSW	in-frame	124	0	0	124	0	0	0	0	0	0	0
IGHV2-26	F	IGHD3-9	F	IGHJ5	F	IGHG1	F	CARIEAYYDILTGYYFSRSNWFDPW	in-frame	124	0	0	0	0	0	0	0	124	0	0
IGHV1-8	F	x	x	IGHJ5,IGHJ4	F	IGHG2	F	CARGEPSKTFGVTSPDW	in-frame	124	124	0	0	0	0	0	0	0	0	0
IGHV1-3	F	x	x	IGHJ3	F	IGHG3	F	CAREVSMVGIDTGGFEVW	in-frame	124	0	0	0	124	0	0	0	0	0	0
IGHV6-1	F	IGHD1-26	F	IGHJ4,IGHJ5	F	IGHG2	F	CARALVGGYFDLW	in-frame	123	0	0	0	0	0	0	0	123	0	0
IGHV4-59	F	x	x	IGHJ4	F	IGHG2	F	CARQAYCTAVTCYPFEYW	in-frame	123	0	0	123	0	0	0	0	0	0	0
IGHV4-39	F	x	x	IGHJ4	F	IGHG2	F	CARLLGDSSSAGDTEYW	in-frame	123	0	0	0	0	0	0	0	0	123	0
IGHV3-NL1,IGHV3-33,IGHV3-30-5	F	IGHD3-22	F	IGHJ5	F	IGHG1	F	CGKDTYDSSGLESW	in-frame	123	0	0	0	0	0	0	123	0	0	0
IGHV3-NL1,IGHV3-30-5,IGHV3-30-3	F	IGHD2/OR15-2b,IGHD2/OR15-2a	ORF	IGHJ4	F	IGHG2	F	CAGYCNSGGCYDVGGYW	in-frame	123	0	0	0	0	0	0	0	0	0	123
IGHV3-NL1	F	IGHD3-10	F	IGHJ6	F	IGHG3	F	CAKCYYASGRYPNHYYGMDVW	in-frame	123	0	0	0	0	123	0	0	0	0	0
IGHV3-74	F	x	x	IGHJ4	F	IGHG2	F	CVRAGPMTTVIYAFDYW	in-frame	123	0	0	0	0	123	0	0	0	0	0
IGHV3-7	F	x	x	IGHJ5	F	IGHG2	F	CARGGNTAGRPLSW	in-frame	123	123	0	0	0	0	0	0	0	0	0
IGHV3-7	F	x	x	IGHJ4	F	IGHG1	F	CAREIGYEYGLGTGDFW	in-frame	123	0	0	0	0	0	123	0	0	0	0
IGHV3-7	F	IGHD2/OR15-2b,IGHD2/OR15-2a	ORF	IGHJ4	F	IGHG2	F	CARGGPWELLAKYYFDLW	in-frame	123	0	0	0	0	0	123	0	0	0	0
IGHV3-30-3	F	IGHD5-24	ORF	IGHJ4	F	IGHG2	F	CVRDVGDGYNQIDHW	in-frame	123	0	0	0	123	0	0	0	0	0	0
IGHV3-23D	F	x	x	IGHJ4	F	IGHG2	F	CAKASPRTSGKYYFDQW	in-frame	123	0	0	0	0	0	0	0	0	123	0
IGHV3-23D	F	IGHD5-5,IGHD5-18	F	IGHJ5	F	IGHG1	F	CAKDSGGVKKQLWLADWFDPW	in-frame	123	0	123	0	0	0	0	0	0	0	0
IGHV3-23D	F	IGHD2-15	F	IGHJ5	F	IGHG2	F	CAKQAVAVAATPWFDSW	in-frame	123	0	0	0	123	0	0	0	0	0	0
IGHV3-15	F	x	x	IGHJ6	F	IGHG2	F	CTKDSPIRGMIQNYYYYGMNVW	in-frame	123	0	0	0	0	123	0	0	0	0	0
IGHV3-15	F	x	x	IGHJ3	F	IGHG2	F	CTTEGLTYGYHSFDNW	in-frame	123	0	0	123	0	0	0	0	0	0	0
IGHV3-15	F	x	x	IGHJ3	F	IGHG2	F	CARRNWKGAFDIW	in-frame	123	0	123	0	0	0	0	0	0	0	0
IGHV3-13	F	IGHD6-19	F	IGHJ5,IGHJ4	F	IGHG2	F	CATSGAEGSGWVHW	in-frame	123	123	0	0	0	0	0	0	0	0	0
IGHV3-11	F	x	x	IGHJ4	F	IGHG3	F	CARGHTMIFYW	in-frame	123	0	0	0	0	123	0	0	0	0	0
IGHV2-5	F	IGHD3-22	F	IGHJ5,IGHJ4	F	IGHG2	F	CAHTYYYDTSGYAWQVW	in-frame	123	0	0	0	0	123	0	0	0	0	0
IGHV1-69D	F	x	x	IGHJ6	F	IGHG2	F	CANRGDTNFGGNYYYTMDVW	in-frame	123	0	0	0	0	0	0	0	0	123	0
IGHV1-69	F	x	x	IGHJ5	F	IGHG1	F	CASGPRKQLEHTQFDPW	in-frame	123	0	0	0	0	0	123	0	0	0	0
IGHV1-3	F	x	x	IGHJ4	F	IGHG1	F	CTRDILNTIIAFDYW	in-frame	123	0	0	0	0	0	0	0	0	123	0
IGHV1-18	F	x	x	IGHJ6	F	IGHG2	F	CARDKWEGSYSYYGMDVW	in-frame	123	0	0	0	0	0	0	0	0	123	0
IGHV1-18	F	IGHD1-26	F	IGHJ5	F	IGHG2	F	CANMVGATTGWPPTW	in-frame	123	0	0	0	123	0	0	0	0	0	0
IGHV5-78	P	x	x	IGHJ4	F	IGHG1	F	CVREAVVPASAYYFDSW	in-frame	122	0	0	0	0	0	0	122	0	0	0
IGHV5-51	F	x	x	IGHJ4	F	IGHG1	F	CARHGTADFDRSGYGDYW	in-frame	122	0	0	0	0	0	122	0	0	0	0
IGHV5-51	F	IGHD5/OR15-5b,IGHD5/OR15-5a	ORF	IGHJ6	F	IGHG1	F	CARHGSLNQADTPFFISVSTSKRHYFYYPMDVW	in-frame	122	0	0	0	0	0	0	122	0	0	0
IGHV4/OR15-8	ORF	x	x	IGHJ4	F	IGHG2	F	CARSYNDW	in-frame	122	0	0	0	0	122	0	0	0	0	0
IGHV4-61,IGHV4-4	F	x	x	IGHJ4	F	IGHG2	F	CVRVMGMMTAVRFDYW	in-frame	122	0	0	0	0	0	0	0	0	122	0
IGHV4-61	F	x	x	IGHJ3	F	IGHG2	F	CARESTRSHATDIW	in-frame	122	0	0	0	0	122	0	0	0	0	0
IGHV4-4	F	x	x	IGHJ5	F	IGHG1	F	CVRVFWSGRLQDRFDPW	in-frame	122	0	0	0	0	0	0	0	0	122	0
IGHV4-34,IGHV4-31	F	x	x	IGHJ5	F	IGHG1	F	CARVVDGSSIRGVSFYNWFDPW	in-frame	122	0	0	122	0	0	0	0	0	0	0
IGHV3-74	F	IGHD5-24,IGHD1-1	ORF	IGHJ4	F	IGHG2	F	CVRDGDNWNFDYW	in-frame	122	0	0	0	122	0	0	0	0	0	0
IGHV3-71	P	x	x	IGHJ4	F	IGHG2	F	CVRIYDYPGRGDPYYFDDW	in-frame	122	0	0	0	0	0	122	0	0	0	0
IGHV3-48	F	x	x	IGHJ5,IGHJ4	F	IGHG1	F	CTREWWGDPWLW	in-frame	122	0	0	0	0	0	0	122	0	0	0
IGHV3-43	F	x	x	IGHJ4	F	IGHG1	F	CAKDVYGEHFDYW	in-frame	122	0	0	122	0	0	0	0	0	0	0
IGHV3-23D	F	x	x	IGHJ4	F	IGHG2	F	CAKSDFEGTRPGNFW	in-frame	122	0	0	0	0	0	0	122	0	0	0
IGHV3-23D	F	x	x	IGHJ4	F	IGHG2	F	CADRPNWGAFDSW	in-frame	122	0	0	0	122	0	0	0	0	0	0
IGHV3-15	F	x	x	IGHJ6	F	IGHG1	F	CTTGVIRWLSRETDYGMDVW	in-frame	122	0	0	0	0	122	0	0	0	0	0
IGHV3-15	F	IGHD3-16	F	IGHJ4	F	IGHG1	F	CTTSYRGVILYW	in-frame	122	0	0	0	0	0	122	0	0	0	0
IGHV3-15	F	IGHD2-2	F	IGHJ3	F	IGHG1	F	CNTDCAGSVSCYNAFDKW	in-frame	122	0	0	0	0	0	0	0	0	122	0
IGHV3-11	F	x	x	IGHJ2	F	IGHG2	F	CARDGESGLDFDLW	in-frame	122	122	0	0	0	0	0	0	0	0	0
IGHV2-5	F	x	x	IGHJ5	F	IGHG2	F	CARRIRDDSGAYYRFDSW	in-frame	122	0	0	0	0	122	0	0	0	0	0
IGHV1-3	F	x	x	IGHJ6	F	IGHG2	F	CTRDRASMDTDYGMDVW	in-frame	122	0	0	0	122	0	0	0	0	0	0
IGHV1-3	F	IGHD6-19	F	IGHJ5	F	IGHG2	F	CARARAASGSGWYDWFDPW	in-frame	122	0	0	0	0	0	0	0	0	122	0
IGHV4-61	F	IGHD3-9	F	IGHJ4	F	IGHG2	F	CAAEVNYDLLTGYSELRYYFDFW	in-frame	121	121	0	0	0	0	0	0	0	0	0
IGHV4-59	F	x	x	IGHJ4	F	IGHG2	F	CARYSSMIVGPYYFEFW	in-frame	121	0	121	0	0	0	0	0	0	0	0
IGHV3-73	F	x	x	IGHJ6	F	IGHG2	F	CTRRNSSTYGMDVW	in-frame	121	121	0	0	0	0	0	0	0	0	0
IGHV3-72	F	x	x	IGHJ4	F	IGHG2	F	CTRGAPPVGAYFDYW	in-frame	121	0	0	0	0	0	0	121	0	0	0
IGHV3-7	F	IGHD1-26	F	IGHJ3	F	IGHG1	F	CARDISFYSGSFHDGFDIW	in-frame	121	0	0	0	0	0	121	0	0	0	0
IGHV3-33	F	x	x	IGHJ6	F	IGHG2	F	CAKVDYTGGDYHYGMDVW	in-frame	121	0	0	0	0	0	0	0	0	121	0
IGHV3-23D	F	x	x	IGHJ6	F	IGHG2	F	CAKRGNYFNAGTHYNMFNYYGMDVW	in-frame	121	0	0	0	0	0	121	0	0	0	0
IGHV3-23D	F	x	x	IGHJ5,IGHJ4	F	IGHG2	F	CVKARGAGHHREYRFDSW	in-frame	121	0	0	0	0	121	0	0	0	0	0
IGHV3-11	F	x	x	IGHJ2	F	IGHG4	F	CARDPRNSNSWNWHFDLW	in-frame	121	0	0	121	0	0	0	0	0	0	0
IGHV1-69D	F	IGHD6-13	F	IGHJ6	F	IGHG2	F	CAAAAGTSSYKYGMDVW	in-frame	121	0	0	0	0	0	0	0	121	0	0
IGHV1-69-2	F	x	x	IGHJ6	F	IGHG4	F	CATISREVPPAIGYYHYAMDVW	in-frame	121	0	0	0	121	0	0	0	0	0	0
IGHV1-69-2	F	IGHD3-10	F	IGHJ4	F	IGHG1	F	CATGWITMVRGVMEGSDYW	in-frame	121	0	0	0	0	0	0	0	0	121	0
IGHV1-3	F	x	x	IGHJ4	F	IGHG2	F	CLRDVFGSADHW	in-frame	121	121	0	0	0	0	0	0	0	0	0
IGHV1-3	F	IGHD6-19	F	IGHJ5	F	IGHG4	F	CVRGEQWLGASW	in-frame	121	0	0	0	0	0	0	0	121	0	0
IGHV7-4-1	F	IGHD3-10	F	IGHJ6	F	IGHG2	F	CARVLVWFGELDYGMDVW	in-frame	120	0	120	0	0	0	0	0	0	0	0
IGHV6-1	F	IGHD2-15	F	IGHJ4	F	IGHG2	F	CARVACSGDRCYSGGFDYW	in-frame	120	0	0	0	0	0	0	0	120	0	0
IGHV5-51	F	x	x	IGHJ6	F	IGHG2	F	CVRLGRTTLTQPHYYHYYYLDVW	in-frame	120	0	0	0	0	0	0	0	0	120	0
IGHV4-61	F	x	x	IGHJ6	F	IGHG2	F	CGRDRGTYGGGMDVW	in-frame	120	120	0	0	0	0	0	0	0	0	0
IGHV4-34	F	x	x	IGHJ4	F	IGHG4	F	CARGIYSSTLYYFDYW	in-frame	120	0	0	0	0	0	120	0	0	0	0
IGHV3/OR16-9,IGHV3-7,IGHV3-69-1	ORF	x	x	IGHJ4	F	IGHG2	F	CLAGYSSSGAYW	in-frame	120	120	0	0	0	0	0	0	0	0	0
IGHV3-NL1,IGHV3-30-5,IGHV3-30-3,IGHV3-30	F	IGHD3-22	F	IGHJ6	F	IGHG1	F	CAKDEGYYYDSSGHYGDYYYYYGMDVW	in-frame	120	0	120	0	0	0	0	0	0	0	0
IGHV3-9	F	x	x	IGHJ4	F	IGHG2	F	CTKAFGSASSWPHYYLDSW	in-frame	120	0	0	0	120	0	0	0	0	0	0
IGHV3-9	F	x	x	IGHJ4	F	IGHG2	F	CAKDRYTSGQYYFDYW	in-frame	120	0	0	0	120	0	0	0	0	0	0
IGHV3-9	F	x	x	IGHJ4	F	IGHG1	F	CAKDRGGLDWEHVFDSW	in-frame	120	0	0	0	0	0	0	120	0	0	0
IGHV3-9	F	IGHD6-19	F	IGHJ5	F	IGHG2	F	CVKGGLIVVAGTWFDHW	in-frame	120	0	0	0	120	0	0	0	0	0	0
IGHV3-33	F	IGHD4-17	F	IGHJ3	F	IGHG1	F	CAREPIYGDSEGDAFNIW	in-frame	120	0	0	0	0	0	0	0	120	0	0
IGHV3-33	F	IGHD1-26	F	IGHJ4	F	IGHG2	F	CARESGSYFDYW	in-frame	120	0	0	0	0	0	0	120	0	0	0
IGHV3-23D	F	x	x	IGHJ4	F	IGHG2	F	CAKDTGWEHAHW	in-frame	120	0	0	0	120	0	0	0	0	0	0
IGHV3-23D	F	IGHD3-10	F	IGHJ4	F	IGHG1	F	CAKSDGSGSYDDFW	in-frame	120	0	0	0	0	0	0	0	0	120	0
IGHV3-15	F	x	x	IGHJ5	F	IGHG2	F	CVTAAVFARGQRFDPW	in-frame	120	0	0	0	120	0	0	0	0	0	0
IGHV3-13	F	IGHD2-15	F	IGHJ6	F	IGHG2	F	CARWGYCSDGSCNLRGMDVW	in-frame	120	0	0	0	0	0	0	0	120	0	0
IGHV2-70D,IGHV2-70	F	IGHD3-10	F	IGHJ6	F	IGHG1	F	CARMHMVRGVTVYNYGMDVW	in-frame	120	0	0	0	0	0	120	0	0	0	0
IGHV2-5	F	x	x	IGHJ4	F	IGHG2	F	CAHTRPPRVIDYW	in-frame	120	120	0	0	0	0	0	0	0	0	0
IGHV1-8	F	IGHD3-10	F	IGHJ4	F	IGHG1	F	CARGPYSRLTMVRGVRPLDYW	in-frame	120	0	0	0	120	0	0	0	0	0	0
IGHV1-69D	F	IGHD2-2	F	IGHJ4	F	IGHG1	F	CARASIVVVPTAPVGYFDYW	in-frame	120	0	0	0	0	0	0	0	0	120	0
IGHV1-3	F	IGHD2-21	F	IGHJ4	F	IGHG1	F	CARFTAGCGGDCRLYYFDYW	in-frame	120	120	0	0	0	0	0	0	0	0	0
IGHV1-18	F	x	x	IGHJ5	F	IGHG1	F	CARAPYGGPDHW	in-frame	120	0	0	0	0	0	0	120	0	0	0
IGHV4-61,IGHV4-59	F	IGHD3-10	F	IGHJ4	F	IGHG2	F	CVREVRVESMVQGIIGGFDNW	in-frame	119	0	119	0	0	0	0	0	0	0	0
IGHV4-34,IGHV4-31	F	x	x	IGHJ3	F	IGHG2	F	CARGFTTTWTLDAFDIW	in-frame	119	0	0	0	0	0	119	0	0	0	0
IGHV4-34	F	x	x	IGHJ4	F	IGHG2	F	CARGPHITWPTPAYW	in-frame	119	0	0	0	119	0	0	0	0	0	0
IGHV4-34	F	x	x	IGHJ4	F	IGHG1	F	CARDVSNDW	in-frame	119	0	0	0	119	0	0	0	0	0	0
IGHV4-34	F	IGHD6-13	F	IGHJ4	F	IGHG3	F	CARNVWGYSSSWYGYFDYW	in-frame	119	0	119	0	0	0	0	0	0	0	0
IGHV3-9	F	x	x	IGHJ4	F	IGHG2	F	CGKDESPGGLDYW	in-frame	119	0	0	0	119	0	0	0	0	0	0
IGHV3-9	F	IGHD3-9	F	IGHJ4	F	IGHG2	F	CAKDIRYDILTGHFDSW	in-frame	119	0	0	0	0	0	0	0	0	119	0
IGHV3-74	F	x	x	IGHJ5	F	IGHG2	F	CVGDLGFRSTTSW	in-frame	119	0	0	0	0	0	0	119	0	0	0
IGHV3-71	P	x	x	IGHJ5	F	IGHG1	F	CARLTATADNNWFDPW	in-frame	119	0	0	0	0	0	0	0	0	119	0
IGHV3-71	P	IGHD4-17	F	IGHJ4	F	IGHG2	F	CARVFSGYDYGDYW	in-frame	119	0	0	0	0	0	0	0	119	0	0
IGHV3-7,IGHV3-69-1,IGHV3-48	F	x	x	IGHJ6	F	IGHG2	F	CARGLPLGFYYYGMDVW	in-frame	119	119	0	0	0	0	0	0	0	0	0
IGHV3-7	F	x	x	IGHJ4	F	IGHG2	F	CARWRTINWSELAYW	in-frame	119	119	0	0	0	0	0	0	0	0	0
IGHV3-66	F	IGHD3-22	F	IGHJ3	F	IGHG2	F	CARDRSPHYYYDNSGYYSDAFDIW	in-frame	119	119	0	0	0	0	0	0	0	0	0
IGHV3-53	F	x	x	IGHJ5	F	IGHG2	F	CASFGGAGIGSW	in-frame	119	0	119	0	0	0	0	0	0	0	0
IGHV3-23D	F	x	x	IGHJ5	F	IGHG1	F	CAKVSDLRCLESW	in-frame	119	0	0	0	0	0	0	0	0	119	0
IGHV3-23D	F	x	x	IGHJ4	F	IGHG2	F	CAKTGPYYFDYW	in-frame	119	0	0	0	0	119	0	0	0	0	0
IGHV3-13	F	x	x	IGHJ4	F	IGHG2	F	CARDAPGSFDYW	in-frame	119	0	0	0	119	0	0	0	0	0	0
IGHV2-5	F	IGHD3-10	F	IGHJ4	F	IGHG2	F	CAHRWHYGSIRNTLFDSW	in-frame	119	119	0	0	0	0	0	0	0	0	0
IGHV2-26	F	x	x	IGHJ4	F	IGHG3	F	CARVDLWGDPPRWLDFW	in-frame	119	0	0	0	0	0	119	0	0	0	0
IGHV1-3	F	x	x	IGHJ5	F	IGHG1	F	CARDRYSSSFRHSNWFDPW	in-frame	119	0	119	0	0	0	0	0	0	0	0
IGHV1-3	F	x	x	IGHJ4	F	IGHG2	F	CATRIEVRLDCW	in-frame	119	0	0	0	0	0	0	0	119	0	0
IGHV1-18	F	x	x	IGHJ3	F	IGHG1	F	CAREGFSVIHVFDLW	in-frame	119	0	0	0	0	0	0	0	0	119	0
IGHV5-51	F	x	x	IGHJ5	F	IGHG2	F	CARQRMTNQLPRAFDLW	in-frame	118	118	0	0	0	0	0	0	0	0	0
IGHV5-51	F	IGHD4-17	F	IGHJ4	F	IGHG2	F	CVRVLFYGDYDNYFDFW	in-frame	118	0	0	0	0	0	0	118	0	0	0
IGHV3-9	F	x	x	IGHJ4	F	IGHG2	F	CATGRGGWHLNWW	in-frame	118	0	118	0	0	0	0	0	0	0	0
IGHV3-9	F	x	x	IGHJ4	F	IGHG2	F	CAKDPSGSFFFGLFYFQYW	in-frame	118	0	0	0	118	0	0	0	0	0	0
IGHV3-74	F	x	x	IGHJ4	F	IGHG2	F	CARDRGYNTLDKW	in-frame	118	0	118	0	0	0	0	0	0	0	0
IGHV3-74	F	x	x	IGHJ3	F	IGHG4	F	CAGRGGHSDAFDIW	in-frame	118	0	0	0	0	0	118	0	0	0	0
IGHV3-7	F	x	x	IGHJ4	F	IGHG2	F	CARDDCTTTSCYGHW	in-frame	118	0	0	0	0	118	0	0	0	0	0
IGHV3-69-1,IGHV3-48	P	IGHD3-22	F	IGHJ5,IGHJ4	F	IGHG1	F	CARDPRNYYDSSGFQW	in-frame	118	0	0	0	0	0	0	118	0	0	0
IGHV3-69-1,IGHV3-48	P	IGHD2-2	F	IGHJ3	F	IGHG2	F	CARDASPQYCSGTSCYIHALDIW	in-frame	118	0	0	0	0	0	0	0	0	118	0
IGHV3-69-1	P	x	x	IGHJ4	F	IGHG2	F	CATSRVFDYW	in-frame	118	0	0	0	0	0	118	0	0	0	0
IGHV3-53	F	x	x	IGHJ6	F	IGHG2	F	CATTSGCLTSCQSYSYDVDVW	in-frame	118	0	0	0	118	0	0	0	0	0	0
IGHV3-49	F	x	x	IGHJ4	F	IGHG1	F	CTRAGGYDNFLDYW	in-frame	118	0	0	0	0	0	0	0	118	0	0
IGHV3-30,IGHV3-48	F	x	x	IGHJ6	F	IGHG1	F	CASAPDWLTPFYYNGTDVW	in-frame	118	0	0	0	0	0	118	0	0	0	0
IGHV3-23D	F	x	x	IGHJ6	F	IGHG1	F	CARARVSTSNLKYGMDVW	in-frame	118	118	0	0	0	0	0	0	0	0	0
IGHV3-23D	F	x	x	IGHJ1	F	IGHG2	F	CSKPALSSDAGAW	in-frame	118	0	118	0	0	0	0	0	0	0	0
IGHV3-23D	F	IGHD3-10	F	IGHJ4	F	IGHG2	F	CAKAYKYVNMVRGVPIDYW	in-frame	118	0	0	0	118	0	0	0	0	0	0
IGHV3-20	ORF	x	x	IGHJ4	F	IGHG2	F	CVRDNKWSYGDSPDYW	in-frame	118	0	0	0	118	0	0	0	0	0	0
IGHV3-15	F	IGHD3-22	F	IGHJ4	F	IGHG1	F	CHYFYDSGGRQRDYW	in-frame	118	0	0	0	0	118	0	0	0	0	0
IGHV3-13	F	x	x	IGHJ4	F	IGHG2	F	CASGRDGWGYW	in-frame	118	118	0	0	0	0	0	0	0	0	0
IGHV2-70	ORF	IGHD3-16	F	IGHJ4	F	IGHG1	F	CVRVNVRNYDYFWGSYRPFWFDYW	in-frame	118	0	0	0	0	0	118	0	0	0	0
IGHV2-26	F	x	x	IGHJ4	F	IGHG1	F	CARILGYAGDYW	in-frame	118	0	0	118	0	0	0	0	0	0	0
IGHV1-46	F	x	x	IGHJ4	F	IGHG1	F	CATSGANHCIDYW	in-frame	118	0	0	0	0	0	0	0	118	0	0
IGHV1-18	F	IGHD3-10	F	IGHJ2	F	IGHG1	F	CARGVLDYYVPGIEPTVGHLDLW	in-frame	118	0	0	0	0	0	118	0	0	0	0
IGHV1-18	F	IGHD2-8	F	IGHJ5	F	IGHG2	F	CARDWDCTGGSCSDCFDPW	in-frame	118	0	0	0	118	0	0	0	0	0	0
IGHV7-4-1	F	IGHD3-9	F	IGHJ4	F	IGHG2	F	CARRSYDILTGYSFDYW	in-frame	117	0	0	0	0	0	0	0	117	0	0
IGHV4-61	F	IGHD5-12	F	IGHJ4	F	IGHG2	F	CARAYSGYDTLDYW	in-frame	117	0	0	0	117	0	0	0	0	0	0
IGHV4-59	F	x	x	IGHJ4	F	IGHG1	F	CARRGNYDSHYDIW	in-frame	117	0	0	0	0	0	0	0	0	0	117
IGHV3-9	F	x	x	IGHJ4	F	IGHG1	F	CAKASGDQLLLDFDHW	in-frame	117	0	0	117	0	0	0	0	0	0	0
IGHV3-74	F	x	x	IGHJ4	F	IGHG2	F	CARGGEQPVDYW	in-frame	117	0	0	0	0	0	0	117	0	0	0
IGHV3-73	F	IGHD6-19	F	IGHJ4	F	IGHG1	F	CTRRSSGWYFYW	in-frame	117	0	0	0	0	0	0	0	0	0	117
IGHV3-7,IGHV3-69-1,IGHV3-48,IGHV3-21	F	x	x	IGHJ4	F	IGHG1	F	CTRDPEAASEAFDYW	in-frame	117	0	0	0	0	0	0	117	0	0	0
IGHV3-7,IGHV3-69-1,IGHV3-48,IGHV3-21	F	IGHD3-9	F	IGHJ6	F	IGHG1	F	CARVDDLLTGYFLGGMDVW	in-frame	117	0	0	0	0	0	0	0	0	117	0
IGHV3-7,IGHV3-11	F	x	x	IGHJ5	F	IGHG2	F	CARGGRTHFDPW	in-frame	117	0	117	0	0	0	0	0	0	0	0
IGHV3-69-1	P	x	x	IGHJ4	F	IGHG2	F	CMRESPAFESDYW	in-frame	117	0	0	0	0	0	0	0	117	0	0
[truncated: 141,779 more rows]

## Sheet: Sheet3
col1	col2	col3	col4	col5	col6	col7	col8	col9	col10	total	1	2	8	9	10	11	12	13	14	15
IGHV4-30-4	F	x	x	IGHJ5	F	IGHG2	F	CARIPIVAGVFGWFDPW	in-frame	11726	0	0	0	0	0	0	0	11726	0	0
IGHV4-55,IGHV4-4	P	x	x	IGHJ4	F	IGHG2	F	CARGPQNAASFYGYW	in-frame	7116	0	0	0	0	0	0	0	0	7116	0
IGHV3-48	F	x	x	IGHJ6	F	IGHG2	F	CARERRWAAAGWGYGMDVW	in-frame	5590	0	0	0	0	0	0	0	0	5590	0
IGHV3-9	F	x	x	IGHJ3	F	IGHG1	F	CAKDGGSGQNGAFDIW	in-frame	3466	0	0	3466	0	0	0	0	0	0	0
IGHV3-23D	F	x	x	IGHJ4	F	IGHG2	F	CAKRSSRANYHFDYW	in-frame	3321	0	0	0	0	0	0	0	0	3321	0
IGHV4-61	F	x	x	IGHJ5	F	IGHG2	F	CVTEGDCGVNSCFAFDSW	in-frame	2825	0	2825	0	0	0	0	0	0	0	0
IGHV3-49	F	x	x	IGHJ5	F	IGHG2	F	CLRGWRPGSW	in-frame	2633	0	0	0	0	0	0	2633	0	0	0
IGHV1-3	F	x	x	IGHJ4	F	IGHG2	F	CARNIPRTIHFDYW	in-frame	2599	0	0	0	0	0	0	0	0	2599	0
IGHV3-23D	F	x	x	IGHJ4	F	IGHG1	F	CAKAPRAGVFGGFEYW	in-frame	2480	0	2480	0	0	0	0	0	0	0	0
IGHV4/OR15-8	ORF	x	x	IGHJ4	F	IGHG2	F	CARGPQNAASFYGYW	in-frame	1807	0	0	0	0	0	0	0	0	1807	0
IGHV3-48	F	x	x	IGHJ5	F	IGHG2	F	CARGLGASWLYSW	in-frame	1758	0	0	0	1758	0	0	0	0	0	0
IGHV3-72	F	x	x	IGHJ4	F	IGHG2	F	CMAWLWGLGYW	in-frame	1644	0	0	0	0	0	0	0	0	1644	0
IGHV4-4	F	x	x	IGHJ4	F	IGHG2	F	CARGPQNAASFYGYW	in-frame	1616	0	0	0	0	0	0	0	0	1616	0
IGHV3-74	F	x	x	IGHJ6	F	IGHG1	F	CATHRGTLYYYDAMDVW	in-frame	1516	0	0	0	1516	0	0	0	0	0	0
IGHV3-23D	F	x	x	IGHJ4	F	IGHG1	F	CAKRSSRANYHFDYW	in-frame	1501	0	0	0	0	0	0	0	0	1501	0
IGHV2-5	F	IGHD3-22	F	IGHJ4	F	IGHG2	F	CAHRRATMIVFDYW	in-frame	1441	0	0	0	0	0	0	0	0	1441	0
IGHV3-9	F	x	x	IGHJ4	F	IGHG2	F	CAKGGTNAREFDSW	in-frame	1434	0	0	1434	0	0	0	0	0	0	0
IGHV3/OR16-9	ORF	x	x	IGHJ4	F	IGHG2	F	CVKGGWELSDW	in-frame	1406	0	0	0	1406	0	0	0	0	0	0
IGHV2-26	F	IGHD3-22	F	IGHJ5	F	IGHG1	F	CARLNYYDTTGYYYYRGVVWFDPW	in-frame	1393	0	0	0	0	0	0	0	0	1393	0
IGHV1-69D	F	IGHD3-22	F	IGHJ4	F	IGHG2	F	CARAPDPTYYYDSSGYWLLSYW	in-frame	1373	0	0	1372	0	0	1	0	0	0	0
IGHV3-23D	F	IGHD6-13	F	IGHJ5	F	IGHG2	F	CVQEGGRYSSSWYISW	in-frame	1347	0	0	0	1347	0	0	0	0	0	0
IGHV1-18	F	IGHD3-10	F	IGHJ4	F	IGHG2	F	CARPDYYGSGSYGYW	in-frame	1323	0	0	1323	0	0	0	0	0	0	0
IGHV4-34,IGHV4-31	F	x	x	IGHJ2	F	IGHG2	F	CARMELGQHWYFDLW	in-frame	1260	0	0	0	0	0	0	1260	0	0	0
IGHV1-3	F	x	x	IGHJ4	F	IGHG2	F	CVRDGGIAASLDDW	in-frame	1211	0	0	1211	0	0	0	0	0	0	0
IGHV3-7	F	x	x	IGHJ5	F	IGHG2	F	CAKGITGSPPW	in-frame	1161	0	0	0	0	0	0	1161	0	0	0
IGHV4-39	F	IGHD1-26	F	IGHJ4	F	IGHG3	F	CASHSGSFPAGYFDYW	in-frame	1148	0	0	0	0	0	0	1148	0	0	0
IGHV3-15	F	x	x	IGHJ4	F	IGHG1	F	CTTGPEMDPQVWSQKFDFW	in-frame	1104	0	0	0	1	0	0	0	0	1103	0
IGHV3-30-3	F	x	x	IGHJ4	F	IGHG2	F	CARDHNFDGDYW	in-frame	1102	0	0	0	0	0	0	0	0	1102	0
IGHV4-34,IGHV4-31	F	IGHD5-5,IGHD5-18	F	IGHJ4	F	IGHG1	F	CARGDSYGYGNFDYW	in-frame	1071	0	0	0	0	0	0	0	0	1071	0
IGHV3-9	F	x	x	IGHJ3	F	IGHG2	F	CAKDIWGRGYSHGFDALDLW	in-frame	1064	0	0	0	0	0	0	0	0	1064	0
IGHV2-5	F	IGHD3-10	F	IGHJ3	F	IGHG2	F	CAHKRNPVVRGVIPDGFDIW	in-frame	1037	1037	0	0	0	0	0	0	0	0	0
IGHV3-48	F	IGHD3-22	F	IGHJ6	F	IGHG1	F	CWINLPSHYDSLYMDVW	in-frame	1034	0	0	0	0	0	0	0	0	1034	0
IGHV4-59,IGHV4-4	F	x	x	IGHJ4	F	IGHG2	F	CAKKDGDYW	in-frame	1033	0	0	0	0	0	0	0	0	1033	0
IGHV3-9	F	x	x	IGHJ3	F	IGHG1	F	CAKDGGSGRNGAFEIW	in-frame	1030	0	0	1030	0	0	0	0	0	0	0
IGHV3-23D	F	x	x	IGHJ4	F	IGHG1	F	CARGGRLPDYW	in-frame	1021	1021	0	0	0	0	0	0	0	0	0
IGHV3-69-1,IGHV3-48	P	x	x	IGHJ3	F	IGHG2	F	CTRDVRTVDVGTTMEVRDAFDIW	in-frame	1015	0	0	0	0	0	0	0	0	1015	0
IGHV3-15	F	x	x	IGHJ4	F	IGHG2	F	CTTIRPRDLQGYW	in-frame	1009	1009	0	0	0	0	0	0	0	0	0
IGHV4-39	F	x	x	IGHJ4	F	IGHG3	F	CASHGGSFPAGYLDYW	in-frame	1003	0	0	0	0	0	0	1003	0	0	0
IGHV3-7,IGHV3-69-1,IGHV3-48	F	IGHD6-13	F	IGHJ4	F	IGHG4	F	CARQTLRAAGTGRYFW	in-frame	981	0	0	0	981	0	0	0	0	0	0
IGHV3-9	F	x	x	IGHJ4	F	IGHG2	F	CAKGGSNAREFDSW	in-frame	961	0	0	961	0	0	0	0	0	0	0
IGHV2-5	F	x	x	IGHJ4	F	IGHG2	F	CAHYIDGARGAFYFDDW	in-frame	955	0	0	0	0	0	0	0	955	0	0
IGHV1-3	F	x	x	IGHJ2	F	IGHG2	F	CARGEDWGRDWHIDLW	in-frame	951	0	0	0	951	0	0	0	0	0	0
IGHV2-70	F	IGHD6-13	F	IGHJ4	F	IGHG2	F	CAHKRVYGSSWLPYFDFW	in-frame	941	0	0	941	0	0	0	0	0	0	0
IGHV2-26	F	x	x	IGHJ4	F	IGHG2	F	CARIVASQFLGGAEYW	in-frame	940	0	0	0	0	0	0	0	0	940	0
IGHV3-23D	F	x	x	IGHJ4	F	IGHG1	F	CARAMYSAAAAHFDYW	in-frame	933	0	0	0	0	0	0	0	0	933	0
IGHV4-34	F	x	x	IGHJ4	F	IGHG1	F	CARGATVVFDYW	in-frame	917	0	0	1	916	0	0	0	0	0	0
IGHV3-23D	F	x	x	IGHJ5,IGHJ4	F	IGHG2	F	CAKGHNNRYYEFFW	in-frame	895	0	0	0	0	0	0	895	0	0	0
IGHV3-23D	F	x	x	IGHJ4	F	IGHG2	F	CANHNNFESGSPRDFDYW	in-frame	877	0	0	0	0	0	877	0	0	0	0
IGHV1-3	F	x	x	IGHJ6	F	IGHG2	F	CARDLVSGTTVSGGMDVW	in-frame	867	0	0	0	0	0	0	0	0	867	0
IGHV3-23D	F	x	x	IGHJ4	F	IGHG3	F	CAKRSSRANYHFDYW	in-frame	854	0	0	0	0	0	0	0	0	854	0
IGHV3-9	F	x	x	IGHJ6	F	IGHG2	F	CARALTGGQFGSDVW	in-frame	837	0	0	0	837	0	0	0	0	0	0
IGHV3-7	F	x	x	IGHJ4	F	IGHG2	F	CARRRSSSKEDYW	in-frame	835	0	0	0	0	0	0	0	0	835	0
IGHV3-9	F	x	x	IGHJ6	F	IGHG1	F	CVHGEGGYLHYHMDVW	in-frame	801	0	0	0	0	801	0	0	0	0	0
IGHV2-26	F	IGHD3-10	F	IGHJ4	F	IGHG2	F	CARVSREYYYGSGRYYFDYW	in-frame	789	0	0	789	0	0	0	0	0	0	0
IGHV3-74	F	x	x	IGHJ4	F	IGHG2	F	CAEGTHTPYYW	in-frame	786	0	0	0	0	0	0	0	0	786	0
IGHV3-74	F	IGHD1-7	F	IGHJ4	F	IGHG3	F	CTRSAYNWNYPDYW	in-frame	780	0	0	0	0	0	0	0	0	780	0
IGHV3-71	P	x	x	IGHJ6	F	IGHG2	F	CARERRWAAAGWGYGMDVW	in-frame	775	0	0	0	0	0	0	0	0	775	0
IGHV3-23D	F	x	x	IGHJ4	F	IGHG1	F	CAKRSSRSNYHFDYW	in-frame	774	0	0	0	0	0	0	0	0	774	0
IGHV2-5	F	IGHD3-10	F	IGHJ5	F	IGHG2	F	CAHSQRPSGSYNWFDPW	in-frame	774	774	0	0	0	0	0	0	0	0	0
IGHV3-23D	F	x	x	IGHJ4	F	IGHG1	F	CAKDFGGRFIPVAIAYYFDYW	in-frame	771	0	0	771	0	0	0	0	0	0	0
IGHV3-74	F	IGHD1-26	F	IGHJ6	F	IGHG2	F	CARDRGSYPWDYYYMDVW	in-frame	769	0	0	0	0	0	0	0	0	769	0
IGHV4-30-4	F	x	x	IGHJ5	F	IGHG3	F	CARAEGYSGVGAFVRWFDPW	in-frame	767	0	0	0	0	0	0	767	0	0	0
IGHV3-74	F	IGHD3-10	F	IGHJ5,IGHJ4	F	IGHG2	F	CATSSGSGLQW	in-frame	767	0	0	0	0	0	0	0	767	0	0
IGHV4-59	F	x	x	IGHJ5	F	IGHG1	F	CARGDKNHYYHSNPFPVENWFDPW	in-frame	745	0	0	0	0	0	745	0	0	0	0
IGHV1-18	F	x	x	IGHJ6	F	IGHG1	F	CARDGGYNDFHYYGLDVW	in-frame	742	0	0	0	0	0	0	0	0	742	0
IGHV3-7,IGHV3-69-1,IGHV3-48,IGHV3-21	F	x	x	IGHJ4	F	IGHG2	F	CARDGHYADNSPFYPDYW	in-frame	737	0	0	0	737	0	0	0	0	0	0
IGHV2-5	F	x	x	IGHJ4	F	IGHG2	F	CAHGAGWLSDYW	in-frame	723	723	0	0	0	0	0	0	0	0	0
IGHV1-18	F	IGHD3-10	F	IGHJ4	F	IGHG1	F	CARDQTMVRGVRPYYFDYW	in-frame	722	0	0	0	0	0	0	0	0	722	0
IGHV3-72	F	x	x	IGHJ4	F	IGHG2	F	CVAWLWGLGYW	in-frame	721	0	0	0	0	0	0	0	0	721	0
IGHV4-61	F	x	x	IGHJ5	F	IGHG2	F	CARDSGSYIGWIDPW	in-frame	714	0	0	0	0	0	0	0	0	714	0
IGHV1-3	F	IGHD5-24	ORF	IGHJ4	F	IGHG2	F	CARRGDGHKYDYW	in-frame	696	0	0	0	0	0	0	0	696	0	0
IGHV2-70	F	IGHD3-10	F	IGHJ3	F	IGHG3	F	CAHRSGGGSGTYGDAFDIW	in-frame	694	0	0	694	0	0	0	0	0	0	0
IGHV4-34	F	x	x	IGHJ6	F	IGHG3	F	CARGNGYSNGWGSYYYYMDVW	in-frame	691	0	0	0	0	0	691	0	0	0	0
IGHV1-3	F	x	x	IGHJ6	F	IGHG2	F	CARSWNYLVQALPKYGMDVW	in-frame	688	0	0	0	0	0	0	0	0	688	0
IGHV4-30-4	F	x	x	IGHJ5	F	IGHG1	F	CARIPIVAGVFGWFDPW	in-frame	687	0	0	0	0	0	0	0	687	0	0
IGHV1-3	F	x	x	IGHJ5	F	IGHG1	F	CARDGHAGNSERWFDPW	in-frame	686	686	0	0	0	0	0	0	0	0	0
IGHV4-4	F	x	x	IGHJ5	F	IGHG2	F	CARDGSGWYEGWFDPW	in-frame	682	0	0	0	682	0	0	0	0	0	0
IGHV7-4-1	F	x	x	IGHJ5	F	IGHG2	F	CAREWFLGLNWFDPW	in-frame	681	0	0	0	0	0	681	0	0	0	0
IGHV3-23D	F	IGHD3-10	F	IGHJ4	F	IGHG2	F	CAKARGSGSHRTYYFDYW	in-frame	680	0	0	0	0	0	0	0	680	0	0
IGHV1-18	F	IGHD3-22	F	IGHJ3	F	IGHG2	F	CAGAGARYYDSRYAFDIW	in-frame	668	0	0	0	0	0	0	0	0	668	0
IGHV3-9	F	IGHD6-19	F	IGHJ4	F	IGHG2	F	CAKELRQWLGSLDHW	in-frame	665	0	0	665	0	0	0	0	0	0	0
IGHV3-11	F	x	x	IGHJ5,IGHJ4	F	IGHG2	F	CGSDGGYGDDPRFW	in-frame	665	665	0	0	0	0	0	0	0	0	0
IGHV3-73	F	IGHD2-15	F	IGHJ6	F	IGHG1	F	CTRHNHCSGGTCYYYYGMDVW	in-frame	661	0	0	0	0	0	0	0	0	661	0
IGHV1-3	F	x	x	IGHJ5,IGHJ4	F	IGHG1	F	CARGPGVVPGAPLFW	in-frame	658	0	0	0	0	0	0	0	0	658	0
IGHV3-9	F	x	x	IGHJ1	F	IGHG1	F	CAKDMVGAWGSFQHW	in-frame	656	0	0	0	0	0	656	0	0	0	0
IGHV4-4	F	x	x	IGHJ1	F	IGHG2	F	CVRDFGYELDW	in-frame	654	0	0	0	654	0	0	0	0	0	0
IGHV4-30-4	F	x	x	IGHJ5	F	IGHG3	F	CARALRISSYHDNWFDPW	in-frame	653	0	0	0	0	0	0	0	0	653	0
IGHV4-59	F	x	x	IGHJ4	F	IGHG2	F	CARGGASSKYFDYW	in-frame	646	0	0	0	0	0	0	646	0	0	0
IGHV1-18	F	x	x	IGHJ6	F	IGHG1	F	CARGLNRLQESRWYFGLDFW	in-frame	645	645	0	0	0	0	0	0	0	0	0
IGHV3-15	F	x	x	IGHJ4	F	IGHG2	F	CTTIALNLGPTYDGLFNYW	in-frame	642	0	0	0	0	0	0	642	0	0	0
IGHV3-23	F	IGHD3-10	F	IGHJ2	F	IGHG1	F	CANGPPEGYYDSGNYWYFDLW	in-frame	641	0	0	0	0	0	641	0	0	0	0
IGHV2-5	F	x	x	IGHJ4	F	IGHG2	F	CAYATTKHSASGGDYW	in-frame	635	0	635	0	0	0	0	0	0	0	0
IGHV3-48	F	x	x	IGHJ6	F	IGHG1	F	CARERRWAAAGWGYGMDVW	in-frame	634	0	0	0	0	0	0	0	0	634	0
IGHV3-74	F	x	x	IGHJ4	F	IGHG2	F	CARDLAGAVDSW	in-frame	631	0	0	0	0	0	631	0	0	0	0
IGHV1-69D	F	x	x	IGHJ4	F	IGHG1	F	CAREEGDRSSFDYW	in-frame	629	0	0	0	0	0	629	0	0	0	0
IGHV3-NL1,IGHV3-30-5,IGHV3-30-3,IGHV3-30	F	IGHD4-17	F	IGHJ4	F	IGHG2	F	CAKILGDGDYVELVDYW	in-frame	627	0	0	0	0	0	0	0	0	627	0
IGHV4-61,IGHV4-38-2,IGHV4-30-2	F	x	x	IGHJ4	F	IGHG2	F	CAREVGDVQTHNIDYW	in-frame	622	0	0	0	0	0	0	0	0	622	0
IGHV4-39	F	x	x	IGHJ4	F	IGHG2	F	CARQIGSGKWNSDYW	in-frame	620	620	0	0	0	0	0	0	0	0	0
IGHV3-7	F	x	x	IGHJ4	F	IGHG1	F	CARRRSSSKEDYW	in-frame	618	0	0	0	0	0	0	0	0	618	0
IGHV3-73	F	x	x	IGHJ6	F	IGHG2	F	CRLATSNMEVW	in-frame	616	0	0	0	616	0	0	0	0	0	0
IGHV2-5	F	x	x	IGHJ4	F	IGHG1	F	CAHSGVRGLVTFDYW	in-frame	616	616	0	0	0	0	0	0	0	0	0
IGHV4-34	F	IGHD3-3	F	IGHJ5	F	IGHG1	F	CAGARSIFGVGARWFDRW	in-frame	612	0	0	0	0	612	0	0	0	0	0
IGHV3-23D	F	x	x	IGHJ4	F	IGHG2	F	CVRGRNVVLQDADLGHSGYW	in-frame	604	0	0	0	0	0	0	0	0	604	0
IGHV3-7	F	x	x	IGHJ5	F	IGHG2	F	CTRSTQEVIGWYELYLW	in-frame	603	0	0	603	0	0	0	0	0	0	0
IGHV2-70,IGHV2-5	F	IGHD6-19	F	IGHJ4	F	IGHG3	F	CAHSRGISSGRYFRAHSDYFDFW	in-frame	598	598	0	0	0	0	0	0	0	0	0
IGHV1-18	F	IGHD6-19	F	IGHJ4	F	IGHG4	F	CARNSSGWSYYFDSW	in-frame	598	0	0	0	0	598	0	0	0	0	0
IGHV3-9	F	x	x	IGHJ6	F	IGHG2	F	CVKDILAGGADVW	in-frame	595	0	0	0	0	0	0	0	0	595	0
IGHV3-74	F	x	x	IGHJ4	F	IGHG2	F	CVRDLVGAGDFW	in-frame	588	0	0	0	0	588	0	0	0	0	0
IGHV2-5	F	x	x	IGHJ4	F	IGHG2	F	CAHSLGSRYFDYW	in-frame	586	0	0	586	0	0	0	0	0	0	0
IGHV3-7,IGHV3-69-1,IGHV3-48,IGHV3-21	F	IGHD3-22	F	IGHJ6	F	IGHG1	F	CARDFGYYYYYGMDVW	in-frame	583	583	0	0	0	0	0	0	0	0	0
IGHV1-3	F	x	x	IGHJ4	F	IGHG2	F	CARGPATAPYYFDYW	in-frame	577	0	0	0	577	0	0	0	0	0	0
IGHV4-39	F	x	x	IGHJ6	F	IGHG2	F	CARARSNYFNYMDVW	in-frame	575	0	0	0	0	0	0	0	0	575	0
IGHV6-1	F	x	x	IGHJ3	F	IGHG2	F	CARDSGIGLDTFDLW	in-frame	574	574	0	0	0	0	0	0	0	0	0
IGHV1-69D	F	IGHD3-22	F	IGHJ4	F	IGHG1	F	CARAPDPTYYYDSSGYWLLSYW	in-frame	569	0	0	569	0	0	0	0	0	0	0
IGHV4-39	F	x	x	IGHJ4	F	IGHG1	F	CARHEIAARPNYW	in-frame	568	0	0	0	0	568	0	0	0	0	0
IGHV1-18	F	x	x	IGHJ4	F	IGHG2	F	CVRGMGGAAGDGTFDYW	in-frame	565	0	0	0	565	0	0	0	0	0	0
IGHV3-53	F	x	x	IGHJ2	F	IGHG2	F	CARGRAGDWYFGLW	in-frame	564	0	0	0	0	0	0	0	0	564	0
IGHV4-39	F	x	x	IGHJ4	F	IGHG3	F	CARHGRSGGRNALLDSW	in-frame	561	0	0	0	0	0	0	0	0	561	0
IGHV3-43	F	x	x	IGHJ4	F	IGHG1	F	CAKDDSHYSSAWYGYFDHW	in-frame	560	0	0	0	0	0	560	0	0	0	0
IGHV3-69-1,IGHV3-48	P	x	x	IGHJ4	F	IGHG1	F	CARESGSSSAIDSW	in-frame	559	0	0	0	0	559	0	0	0	0	0
IGHV1-3	F	x	x	IGHJ2	F	IGHG2	F	CARGEDWGRDWYIDLW	in-frame	557	0	0	0	557	0	0	0	0	0	0
IGHV3-74	F	IGHD6-6	F	IGHJ6	F	IGHG2	F	CARQQGSSSFYYYYMDVW	in-frame	555	0	0	0	0	0	0	0	0	555	0
IGHV4/OR15-8,IGHV4-61,IGHV4-4	ORF	x	x	IGHJ4	F	IGHG2	F	CAGHMIAYSTFDSW	in-frame	554	0	0	0	0	0	0	0	0	554	0
IGHV4-39	F	x	x	IGHJ5	F	IGHG1	F	CARQLESEGFDPW	in-frame	554	0	0	0	0	0	0	0	0	554	0
IGHV3-9	F	IGHD3-10	F	IGHJ5	F	IGHG2	F	CAKGSGSYYPNFFDSW	in-frame	554	0	0	0	0	0	0	0	0	554	0
IGHV4-59	F	x	x	IGHJ4	F	IGHG2	F	CARHKPSSTSFDYW	in-frame	552	0	0	0	0	0	0	0	0	0	552
IGHV4-30-2	F	IGHD2-2	F	IGHJ3	F	IGHG1	F	CARGPYCSSVSCNTFGFDAW	in-frame	550	0	0	0	0	0	0	0	0	550	0
IGHV2-70D,IGHV2-70	F	x	x	IGHJ3	F	IGHG1	F	CARIRRDGEDAFDIW	in-frame	550	0	0	0	0	0	0	0	0	550	0
IGHV2-5	F	x	x	IGHJ4	F	IGHG2	F	CARDSLDYW	in-frame	547	0	0	0	0	0	0	0	547	0	0
IGHV2-5	F	x	x	IGHJ3	F	IGHG1	F	CAHRKPGFGDEAFDIW	in-frame	542	0	0	0	0	0	542	0	0	0	0
IGHV1-3	F	IGHD3-22	F	IGHJ4	F	IGHG2	F	CARDYYYDGSGYFDYW	in-frame	539	0	0	0	0	0	0	0	0	539	0
IGHV3-7	F	x	x	IGHJ4	F	IGHG2	F	CVKGPLTTATGEYW	in-frame	536	0	0	0	0	0	0	0	0	536	0
IGHV3-9	F	IGHD6-19	F	IGHJ4	F	IGHG1	F	CGKDIGNSGWSNSIDYW	in-frame	535	0	0	0	0	0	0	0	0	535	0
IGHV5-51	F	x	x	IGHJ4	F	IGHG1	F	CARLSSSGTYVDYW	in-frame	531	0	0	0	0	0	0	0	0	531	0
IGHV3-72	F	IGHD2-21	F	IGHJ5	F	IGHG2	F	CGRGPSCRGGDCRFSGGFDPW	in-frame	530	0	0	0	0	0	0	0	0	530	0
IGHV1-3	F	x	x	IGHJ4	F	IGHG2	F	CARGYSTSYLDYW	in-frame	524	0	0	524	0	0	0	0	0	0	0
IGHV3-20	ORF	x	x	IGHJ4	F	IGHG1	F	CVRGGGPGRTWYDHFDSW	in-frame	522	0	0	0	0	0	0	0	0	522	0
IGHV1-18	F	x	x	IGHJ4	F	IGHG2	F	CARDPLQVAGFDYW	in-frame	520	0	0	0	0	0	0	0	0	520	0
IGHV3-74	F	x	x	IGHJ4	F	IGHG1	F	CARAQYSGSRFDSW	in-frame	518	0	0	0	0	0	0	0	0	518	0
IGHV1-46	F	IGHD6-13	F	IGHJ4	F	IGHG1	F	CTKPLIATAGRGFDFW	in-frame	518	0	518	0	0	0	0	0	0	0	0
IGHV4/OR15-8	ORF	IGHD1-26	F	IGHJ4	F	IGHG2	F	CASYIVGAGGPGFW	in-frame	517	0	0	0	0	0	0	0	0	517	0
IGHV3-49	F	x	x	IGHJ4	F	IGHG1	F	CTRDHVDTFRILRPLDYW	in-frame	516	516	0	0	0	0	0	0	0	0	0
IGHV3-74	F	IGHD3-9	F	IGHJ4	F	IGHG2	F	CTKDFDWENGYW	in-frame	514	0	0	0	514	0	0	0	0	0	0
IGHV3-15	F	x	x	IGHJ4	F	IGHG2	F	CITDPCEWPGGYW	in-frame	514	0	0	0	0	0	0	0	0	514	0
IGHV4-59	F	IGHD3-10	F	IGHJ5	F	IGHG1	F	CARLSRGYGSGSYRNWFDPW	in-frame	509	0	0	0	509	0	0	0	0	0	0
IGHV1-3	F	x	x	IGHJ4	F	IGHG2	F	CARALANIPATGDYW	in-frame	508	0	0	0	0	0	0	0	0	508	0
IGHV3-7	F	x	x	IGHJ3,IGHJ6	F	IGHG2	F	CANGGYGFW	in-frame	505	0	0	0	505	0	0	0	0	0	0
IGHV5-51	F	x	x	IGHJ5	F	IGHG2	F	CARLNGICTSTSCSKDTHWFDPW	in-frame	504	0	0	0	0	0	0	0	0	504	0
IGHV2-5	F	IGHD3-10	F	IGHJ3	F	IGHG2	F	CAHKRVPVVREVIPDAFDIW	in-frame	502	502	0	0	0	0	0	0	0	0	0
IGHV3-74	F	IGHD3-22	F	IGHJ6	F	IGHG1	F	CARDFGGYYDSSGYYPPLQYGVDVW	in-frame	500	0	0	0	0	0	0	500	0	0	0
IGHV3-9	F	x	x	IGHJ4	F	IGHG1	F	CAKAHNFYSDAAGLDSW	in-frame	499	0	0	0	0	0	0	0	0	499	0
IGHV3-11	F	x	x	IGHJ4	F	IGHG2	F	CAKTARLCDFW	in-frame	498	0	0	0	0	0	0	0	0	498	0
IGHV3-74	F	x	x	IGHJ6	F	IGHG2	F	CARAGAYEFIHKYFYGLDVW	in-frame	494	494	0	0	0	0	0	0	0	0	0
IGHV2-5	F	x	x	IGHJ3	F	IGHG2	F	CARRFDSRDAFDVW	in-frame	491	0	0	0	0	0	0	0	0	491	0
IGHV1-3	F	x	x	IGHJ4	F	IGHG2	F	CARTPGIEEKSGRYFDLW	in-frame	490	0	0	0	0	0	0	0	0	490	0
IGHV3-15	F	x	x	IGHJ6	F	IGHG1	F	CATVGHSYYYYYYMDVW	in-frame	483	0	0	0	0	0	0	483	0	0	0
IGHV3-49	F	x	x	IGHJ6	F	IGHG1	F	CTRGVLTGFYYYYMDVW	in-frame	482	0	0	0	0	0	482	0	0	0	0
IGHV3-43D	F	x	x	IGHJ6	F	IGHG2	F	CVKGVPYNSDWDPSYYHYYLDVW	in-frame	482	0	0	0	0	0	0	0	0	482	0
IGHV3-23D	F	IGHD6-25	F	IGHJ4	F	IGHG1	F	CARNSSGHLSTDSW	in-frame	482	0	0	0	0	0	482	0	0	0	0
IGHV2-70D,IGHV2-70	F	x	x	IGHJ3	F	IGHG1	F	CTRNTGGSCYVAFEIW	in-frame	482	0	0	482	0	0	0	0	0	0	0
IGHV4-4	F	x	x	IGHJ4	F	IGHG1	F	CARESVLSAELRYW	in-frame	480	0	0	0	0	0	0	0	0	480	0
IGHV3-9	F	IGHD1-7	F	IGHJ6	F	IGHG1	F	CARDSGLELPSDYMDVW	in-frame	480	0	0	0	0	0	0	0	0	480	0
IGHV3-49	F	x	x	IGHJ5,IGHJ4	F	IGHG2	F	CVAEVTLTSLSLW	in-frame	479	0	0	0	0	0	0	0	0	479	0
IGHV2-70	F	x	x	IGHJ5	F	IGHG1	F	CVHRHERGEDDWPHNWFDPW	in-frame	478	0	0	0	478	0	0	0	0	0	0
IGHV4-39	F	x	x	IGHJ4	F	IGHG1	F	CVRRGPYSYGPFDYW	in-frame	477	477	0	0	0	0	0	0	0	0	0
IGHV3-53	F	x	x	IGHJ3	F	IGHG4	F	CARDAEAFDLW	in-frame	476	0	0	0	0	0	476	0	0	0	0
IGHV4-30-4,IGHV4-30-2	F	x	x	IGHJ5	F	IGHG2	F	CARIPIVAAVFGWFDPW	in-frame	475	0	0	0	0	0	0	0	475	0	0
IGHV3-74	F	x	x	IGHJ4	F	IGHG2	F	CARGTQHLPGSDYW	in-frame	475	0	0	0	0	0	0	475	0	0	0
IGHV4-39	F	x	x	IGHJ5	F	IGHG3	F	CARMTGSYGAGCFDPW	in-frame	474	0	0	0	0	0	0	474	0	0	0
IGHV4-59	F	x	x	IGHJ4	F	IGHG2	F	CAGGHWGYADVW	in-frame	473	0	0	473	0	0	0	0	0	0	0
IGHV3-23	F	x	x	IGHJ3	F	IGHG1	F	CSGLAAFDVW	in-frame	473	0	0	0	0	0	473	0	0	0	0
IGHV3-9	F	x	x	IGHJ5	F	IGHG1	F	CAKGAPFGEGPNWFDPW	in-frame	469	0	0	0	0	0	0	0	0	469	0
IGHV1-3	F	x	x	IGHJ2	F	IGHG2	F	CARGEDWGRDWYIGLW	in-frame	469	0	0	0	469	0	0	0	0	0	0
IGHV3-23D	F	IGHD6-13	F	IGHJ5	F	IGHG1	F	CAQEGGRYSSSWYISW	in-frame	465	0	0	0	465	0	0	0	0	0	0
IGHV2-5	F	x	x	IGHJ4	F	IGHG4	F	CVHGRGPFYDW	in-frame	464	0	0	464	0	0	0	0	0	0	0
IGHV2-70D,IGHV2-70	F	IGHD6-19	F	IGHJ6	F	IGHG1	F	CARIRGIAVAGRNYYYYGMDVW	in-frame	461	0	0	461	0	0	0	0	0	0	0
IGHV1-18	F	IGHD6-19	F	IGHJ4	F	IGHG2	F	CARTDSSGWYDFDYW	in-frame	461	0	0	460	0	0	0	0	0	1	0
IGHV2-5	F	x	x	IGHJ6	F	IGHG1	F	CAHTFSDWLPRCYMDVW	in-frame	460	0	0	0	0	0	0	0	0	460	0
IGHV3-74	F	x	x	IGHJ5	F	IGHG2	F	CGKDSFGPEDSW	in-frame	458	0	0	0	0	458	0	0	0	0	0
IGHV1-18	F	x	x	IGHJ5	F	IGHG2	F	CARGPTTGLNWFDSW	in-frame	457	0	0	0	457	0	0	0	0	0	0
IGHV1-18	F	IGHD3-10	F	IGHJ5	F	IGHG1	F	CARDRLWFGELSPW	in-frame	456	0	0	456	0	0	0	0	0	0	0
IGHV1-18	F	IGHD3-3	F	IGHJ6	F	IGHG1	F	CARDYYDFWSGYYRSDYYYYGMDVW	in-frame	455	0	0	0	0	0	0	0	0	455	0
IGHV3-69-1	P	x	x	IGHJ3	F	IGHG2	F	CTRDVRTVDVGTTMEVRDAFDIW	in-frame	454	0	0	0	0	0	0	0	0	454	0
IGHV1-18	F	x	x	IGHJ6	F	IGHG1	F	CARLWTWIPYSMDIW	in-frame	452	0	0	452	0	0	0	0	0	0	0
IGHV3-9	F	x	x	IGHJ4	F	IGHG2	F	CGKDERPGGLAYW	in-frame	451	0	0	0	0	0	0	0	0	451	0
IGHV3-33	F	x	x	IGHJ4	F	IGHG2	F	CARGHGVGRVYFDYW	in-frame	451	0	0	0	451	0	0	0	0	0	0
IGHV1-18	F	x	x	IGHJ5	F	IGHG2	F	CARSARGDSCDKCFDIW	in-frame	451	451	0	0	0	0	0	0	0	0	0
IGHV4-59,IGHV4-39	F	x	x	IGHJ4	F	IGHG2	F	CAASPSFVNSDRHRSPLDYW	in-frame	450	0	0	0	450	0	0	0	0	0	0
IGHV3-9	F	x	x	IGHJ4	F	IGHG2	F	CARDTVMSSIATTGTYFDHW	in-frame	447	0	0	0	0	0	0	0	447	0	0
IGHV2-70,IGHV2-5	F	IGHD3-16	F	IGHJ4	F	IGHG1	F	CAHRRGDVVWGSDRYTPGFFDYW	in-frame	447	0	0	447	0	0	0	0	0	0	0
IGHV1-69D	F	IGHD3-10	F	IGHJ6	F	IGHG1	F	CATSRMVRGFYYYGMDVW	in-frame	446	0	0	0	0	0	0	0	0	446	0
IGHV2-5	F	x	x	IGHJ4	F	IGHG1	F	CAHSPPAVSTVSFDYW	in-frame	443	0	0	0	0	0	443	0	0	0	0
IGHV5-51	F	IGHD3-22	F	IGHJ5,IGHJ4	F	IGHG1	F	CARSSVDDSGGFYYPAGSW	in-frame	442	0	0	0	0	0	0	0	0	442	0
IGHV4-34	F	x	x	IGHJ4	F	IGHG1	F	CARTRDRLSFYYW	in-frame	442	0	0	442	0	0	0	0	0	0	0
IGHV3-9	F	x	x	IGHJ5	F	IGHG1	F	CAKGVVGGSTYNWFDLW	in-frame	442	0	0	0	0	0	0	0	0	442	0
IGHV1-18	F	x	x	IGHJ6	F	IGHG1	F	CARVTGMLVVHSYYYYMDVW	in-frame	442	0	0	0	0	0	442	0	0	0	0
IGHV4-4	F	x	x	IGHJ6	F	IGHG2	F	CARELSSGMDVW	in-frame	441	0	0	0	0	0	0	0	0	441	0
IGHV3-23D	F	x	x	IGHJ3	F	IGHG2	F	CAKKLSATIGAFDIW	in-frame	441	441	0	0	0	0	0	0	0	0	0
IGHV3-74	F	x	x	IGHJ4	F	IGHG1	F	CARGLFTLEGYW	in-frame	440	0	0	0	0	0	0	0	0	440	0
IGHV3-23D	F	x	x	IGHJ3	F	IGHG2	F	CAKFPVGAAYAFDIW	in-frame	440	0	0	0	0	0	440	0	0	0	0
IGHV3-23D	F	IGHD1-7	F	IGHJ4	F	IGHG1	F	CAKDPKLELGDVYFDYW	in-frame	439	0	0	0	0	0	0	0	0	439	0
IGHV3-64,IGHV3-30-3,IGHV3-30	F	IGHD3-22	F	IGHJ4	F	IGHG2	F	CASSVRYYDSNGFYPYYFDSW	in-frame	437	0	437	0	0	0	0	0	0	0	0
IGHV1-24	F	x	x	IGHJ6	F	IGHG2	F	CGTESQRTYGVYYGMDVW	in-frame	437	437	0	0	0	0	0	0	0	0	0
IGHV3-9	F	IGHD6-13	F	IGHJ5	F	IGHG2	F	CAKGGQQLVWDWFDPW	in-frame	436	0	0	0	0	0	0	0	0	436	0
IGHV3-23	F	x	x	IGHJ4	F	IGHG1	F	CAKTRGPYAMNPDYW	in-frame	436	0	0	0	0	0	436	0	0	0	0
IGHV1-8	F	IGHD2-2	F	IGHJ6	F	IGHG3	F	CAKMRGTLHCSTTSCRYYYYGMDVW	in-frame	436	0	0	0	0	0	0	0	0	436	0
IGHV1-18	F	x	x	IGHJ4	F	IGHG2	F	CARDRLTDSRGWFEEGRGYW	in-frame	436	0	0	0	0	0	0	0	436	0	0
IGHV3-9	F	IGHD6-19	F	IGHJ6	F	IGHG3	F	CTKDSRAVDGSFDYYYGMDVW	in-frame	432	0	0	0	0	0	0	0	0	432	0
IGHV3-9	F	x	x	IGHJ6	F	IGHG2	F	CTKDILPGGADVW	in-frame	431	431	0	0	0	0	0	0	0	0	0
IGHV3-72	F	x	x	IGHJ5	F	IGHG2	F	CSRLWVVGGTIGLDRW	in-frame	431	0	0	431	0	0	0	0	0	0	0
IGHV3-74	F	x	x	IGHJ5,IGHJ4	F	IGHG1	F	CVRGTTGISGLETW	in-frame	430	0	0	0	0	430	0	0	0	0	0
IGHV3-43	F	IGHD5-5,IGHD5-18	F	IGHJ4	F	IGHG2	F	CGRASGYTYDLDSW	in-frame	430	0	0	0	0	0	0	0	0	430	0
IGHV2-5	F	x	x	IGHJ5	F	IGHG1	F	CVHHKEGLIRAW	in-frame	430	430	0	0	0	0	0	0	0	0	0
IGHV4-34	F	x	x	IGHJ4	F	IGHG2	F	CARGRRKQWLNW	in-frame	429	429	0	0	0	0	0	0	0	0	0
IGHV2-5	F	IGHD6-19	F	IGHJ4	F	IGHG2	F	CAHGSGWLFDYW	in-frame	429	0	0	373	0	0	0	0	56	0	0
IGHV3-7	F	x	x	IGHJ4	F	IGHG2	F	CVKGGWELSDW	in-frame	428	0	0	0	428	0	0	0	0	0	0
IGHV1-18	F	IGHD2-2	F	IGHJ4	F	IGHG2	F	CSRSSSTNRGSDYW	in-frame	426	0	0	0	0	0	0	0	426	0	0
IGHV3-15	F	IGHD2-2	F	IGHJ2	F	IGHG1	F	CTTNSVRSTSCPSAACWYFDLW	in-frame	425	0	0	0	0	0	0	0	0	425	0
IGHV4-4	F	x	x	IGHJ4	F	IGHG2	F	CVRDRRVFDGYNLPFDCW	in-frame	423	0	0	423	0	0	0	0	0	0	0
IGHV4-30-4	F	x	x	IGHJ5	F	IGHG1	F	CARAEGYSGVGAFVRWFDPW	in-frame	422	0	0	0	0	0	0	422	0	0	0
IGHV3-74	F	x	x	IGHJ4	F	IGHG2	F	CVRGTSDWVGVDYW	in-frame	422	0	0	0	0	422	0	0	0	0	0
IGHV3-7	F	x	x	IGHJ4	F	IGHG2	F	CTRDDQAFRLYTSGDFW	in-frame	421	0	0	0	0	0	0	0	0	0	421
IGHV7-4-1	F	x	x	IGHJ5,IGHJ4	F	IGHG1	F	CARDARGRLFGFDHW	in-frame	419	0	0	419	0	0	0	0	0	0	0
IGHV3-64	F	IGHD3-22	F	IGHJ6	F	IGHG2	F	CAREPIGQYYDSSGYYYDYYYGMDVW	in-frame	419	0	0	0	0	0	419	0	0	0	0
IGHV1-18	F	x	x	IGHJ6	F	IGHG2	F	CARHGNAWSLDVW	in-frame	418	0	0	0	0	0	0	0	418	0	0
IGHV1-18	F	x	x	IGHJ4	F	IGHG2	F	CARLRYKGPTTLDFW	in-frame	418	0	0	0	0	0	0	0	0	418	0
IGHV1-18	F	x	x	IGHJ6	F	IGHG2	F	CARSPRVLYFYMDVW	in-frame	417	0	0	0	0	417	0	0	0	0	0
IGHV5-10-1	F	x	x	IGHJ6	F	IGHG2	F	CARYMSLNVGVYYFMDVW	in-frame	414	0	414	0	0	0	0	0	0	0	0
IGHV3-53	F	x	x	IGHJ4	F	IGHG2	F	CARDTHTHLRADWW	in-frame	414	414	0	0	0	0	0	0	0	0	0
IGHV1-3	F	IGHD2-2	F	IGHJ6	F	IGHG1	F	CARTIGYCSSARCPPYGMDVW	in-frame	414	0	0	0	0	0	0	0	0	414	0
IGHV4-39	F	x	x	IGHJ4	F	IGHG1	F	CARLREYNFDFW	in-frame	412	0	0	0	0	0	0	412	0	0	0
IGHV2-5	F	x	x	IGHJ4	F	IGHG1	F	CAHKGYSGIDYW	in-frame	412	0	0	0	0	0	412	0	0	0	0
IGHV3-23D	F	x	x	IGHJ4	F	IGHG2	F	CAKKVYHRLDYW	in-frame	411	0	0	0	0	0	0	0	0	411	0
IGHV3-23D	F	IGHD3-3	F	IGHJ4	F	IGHG2	F	CAKGAIFGVVIFQPFDYW	in-frame	409	0	0	0	0	0	0	0	0	409	0
IGHV3-49	F	x	x	IGHJ3	F	IGHG2	F	CSKYGSGLKDVW	in-frame	408	0	0	0	0	0	0	0	0	408	0
IGHV1-3	F	IGHD3-10	F	IGHJ4	F	IGHG2	F	CAGARYYHSGSYFRLDYW	in-frame	407	407	0	0	0	0	0	0	0	0	0
IGHV7-4-1	F	x	x	IGHJ3	F	IGHG1	F	CARGRSHSWYDFDAFDIW	in-frame	406	0	0	406	0	0	0	0	0	0	0
IGHV3-7	F	x	x	IGHJ6	F	IGHG2	F	CLRPSRGDPADVW	in-frame	406	0	0	0	0	0	0	0	0	406	0
IGHV3-23D	F	IGHD3-22	F	IGHJ4	F	IGHG2	F	CAKKSSSGYYPYDYW	in-frame	406	406	0	0	0	0	0	0	0	0	0
IGHV3-72	F	IGHD1-26	F	IGHJ4	F	IGHG2	F	CVRLRSGRYYFDYW	in-frame	404	0	0	0	0	0	0	0	0	404	0
IGHV3-15	F	x	x	IGHJ6	F	IGHG3	F	CTTVSHTYYYYYYMDVW	in-frame	403	0	0	0	0	0	0	403	0	0	0
IGHV1-18	F	IGHD2-2	F	IGHJ4	F	IGHG2	F	CARSRGSSTSCPSDW	in-frame	403	0	0	0	0	0	0	0	0	403	0
IGHV3-11	F	x	x	IGHJ5	F	IGHG1	F	CARRVVTRFDLW	in-frame	401	0	0	401	0	0	0	0	0	0	0
IGHV2-5	F	IGHD6-19	F	IGHJ5,IGHJ4	F	IGHG2	F	CAHSSGWLPDIW	in-frame	400	0	0	0	0	0	0	0	0	0	400
IGHV4-34	F	x	x	IGHJ4	F	IGHG2	F	CSTWVSDITADFW	in-frame	399	0	0	0	0	0	0	0	0	0	399
IGHV1-3	F	x	x	IGHJ4	F	IGHG2	F	CAREGSIMGGGLDYW	in-frame	399	0	0	0	0	0	399	0	0	0	0
IGHV1-18	F	IGHD2-2	F	IGHJ2	F	IGHG2	F	CVRDSRSHCSSTSCEGYFDLW	in-frame	399	0	0	0	0	0	0	0	0	399	0
IGHV4-39	F	x	x	IGHJ4	F	IGHG1	F	CAREGLCGIAACAFDYW	in-frame	398	0	398	0	0	0	0	0	0	0	0
IGHV3-53	F	x	x	IGHJ4	F	IGHG1	F	CAKDRRLTTIVVDSW	in-frame	398	398	0	0	0	0	0	0	0	0	0
IGHV4-59	F	x	x	IGHJ4	F	IGHG2	F	CAKKDGDYW	in-frame	396	0	0	0	0	0	0	0	0	396	0
IGHV3-9	F	IGHD2-2	F	IGHJ4	F	IGHG1	F	CAKAGLGYCSSTSCYEYFDYW	in-frame	396	0	0	0	0	0	0	0	0	396	0
IGHV5-51	F	x	x	IGHJ6	F	IGHG2	F	CARLTSDVAAPAEGLYGMDVW	in-frame	395	395	0	0	0	0	0	0	0	0	0
IGHV3-13	F	x	x	IGHJ4	F	IGHG2	F	CARAGAKISVAGTHIDFW	in-frame	394	0	0	0	0	0	0	0	394	0	0
IGHV1-18	F	x	x	IGHJ4	F	IGHG4	F	CAKSYVPDYW	in-frame	394	0	0	0	0	0	0	0	394	0	0
IGHV5-51	F	x	x	IGHJ4	F	IGHG1	F	CARLWEVGPRKFDYW	in-frame	393	0	0	0	0	0	0	0	0	393	0
IGHV1-18	F	x	x	IGHJ6	F	IGHG1	F	CARADYYGPWGMDVW	in-frame	393	0	0	393	0	0	0	0	0	0	0
IGHV4-61	F	x	x	IGHJ6	F	IGHG1	F	CTRDVRHLSIYYGMVVW	in-frame	391	0	0	0	0	0	0	0	0	391	0
IGHV3-23D	F	x	x	IGHJ4	F	IGHG2	F	CARKVYYRLDFW	in-frame	391	0	0	0	0	0	0	0	0	391	0
IGHV1-46,IGHV1-3	F	x	x	IGHJ4	F	IGHG2	F	CARDYLHDVPAYFDYW	in-frame	391	0	0	0	0	0	0	0	0	391	0
IGHV1-2	F	x	x	IGHJ1	F	IGHG2	F	CVRVRVWGEGYFQHW	in-frame	390	0	0	390	0	0	0	0	0	0	0
IGHV4-30-4	F	IGHD3-3	F	IGHJ5	F	IGHG1	F	CARDLWSGYYSSWFDPW	in-frame	389	0	0	0	0	0	0	0	0	389	0
IGHV3-7,IGHV3-69-1,IGHV3-48,IGHV3-21	F	IGHD3-22	F	IGHJ6	F	IGHG1	F	CARAFYDTSGYYPYGMDVW	in-frame	389	0	0	0	0	0	0	0	0	389	0
IGHV3-23D	F	IGHD6-13	F	IGHJ6	F	IGHG1	F	CTKAGQLGSSWSLGYYFYMDVW	in-frame	389	0	0	0	0	0	0	0	0	389	0
IGHV3-NL1,IGHV3-30-5,IGHV3-30-3,IGHV3-30	F	x	x	IGHJ4	F	IGHG2	F	CAKEGYTSGRCGAFNYW	in-frame	388	388	0	0	0	0	0	0	0	0	0
IGHV3-23	F	x	x	IGHJ4	F	IGHG2	F	CAKDVTAAAYYFDYW	in-frame	388	0	0	0	0	0	388	0	0	0	0
IGHV3-48	F	x	x	IGHJ4	F	IGHG1	F	CARDGGSLILALDNW	in-frame	386	0	0	0	0	0	0	0	0	386	0
IGHV3-74	F	IGHD3-9	F	IGHJ4	F	IGHG2	F	CTRDFDWENGYW	in-frame	385	0	0	0	385	0	0	0	0	0	0
IGHV3-15	F	x	x	IGHJ5,IGHJ4	F	IGHG2	F	CTKIGMKQEFNLW	in-frame	385	0	0	0	0	0	0	0	385	0	0
IGHV3-15	F	IGHD3-10	F	IGHJ6	F	IGHG2	F	CTTDRSVVRGVPYDSYYMDVW	in-frame	384	0	0	0	0	384	0	0	0	0	0
IGHV5-51	F	IGHD1-1	F	IGHJ5	F	IGHG2	F	CARFMGPALRYNWFDPW	in-frame	383	0	0	0	0	0	0	0	0	383	0
IGHV4-4	F	x	x	IGHJ4	F	IGHG2	F	CSRDTQYHLDW	in-frame	383	0	0	0	383	0	0	0	0	0	0
IGHV1-69D	F	IGHD2-21	F	IGHJ4	F	IGHG1	F	CARFAEAYCGGDCSSLLDYW	in-frame	383	0	0	0	0	0	0	0	0	383	0
IGHV4-39	F	IGHD1-26	F	IGHJ4	F	IGHG1	F	CATLKVPLGATADYW	in-frame	382	0	0	382	0	0	0	0	0	0	0
IGHV3-9	F	IGHD3-3	F	IGHJ6	F	IGHG2	F	CVKGRNFWSASGNGMDVW	in-frame	381	0	0	0	0	0	0	0	0	381	0
IGHV1-18	F	x	x	IGHJ4	F	IGHG2	F	CARDIGVLEGPLGPDYW	in-frame	381	0	0	0	0	0	381	0	0	0	0
IGHV4-61,IGHV4-59	F	IGHD3/OR15-3b,IGHD3/OR15-3a	ORF	IGHJ3	F	IGHG1	F	CAREMGGEGYFGLVAGAFDIW	in-frame	380	0	0	380	0	0	0	0	0	0	0
IGHV3-23D	F	x	x	IGHJ4	F	IGHG2	F	CAKRISVMFPFDSW	in-frame	380	0	0	0	380	0	0	0	0	0	0
IGHV3-15	F	IGHD5-12	F	IGHJ6	F	IGHG1	F	CTTLHSGYDYDYDGMDVW	in-frame	380	380	0	0	0	0	0	0	0	0	0
IGHV1-3	F	x	x	IGHJ6	F	IGHG1	F	CARPRISSVRGEDDDLDVW	in-frame	379	379	0	0	0	0	0	0	0	0	0
IGHV4-34,IGHV4-31	F	x	x	IGHJ4	F	IGHG2	F	CARVLTRGGYSDYW	in-frame	378	0	0	0	0	0	0	0	0	378	0
IGHV3-9	F	x	x	IGHJ6	F	IGHG1	F	CAKDIAPGNYYYYGMDVW	in-frame	377	0	0	0	0	0	377	0	0	0	0
IGHV3-11	F	x	x	IGHJ5	F	IGHG1	F	CARGEGPQSWFDPW	in-frame	377	0	0	0	0	0	377	0	0	0	0
IGHV4-61,IGHV4-59,IGHV4-38-2,IGHV4-30-2	F	IGHD3-10	F	IGHJ4	F	IGHG1	F	CAGSYYRWYYFDYW	in-frame	376	0	0	0	0	0	0	0	0	376	0
IGHV1-46	F	x	x	IGHJ4	F	IGHG2	F	CARGYNYGSGYW	in-frame	375	0	0	0	0	0	0	0	0	375	0
IGHV1-18	F	IGHD3-22	F	IGHJ4	F	IGHG1	F	CARVKFHYYYDGRGYLYYLDYW	in-frame	375	0	0	0	0	0	375	0	0	0	0
IGHV4-61,IGHV4-59	F	IGHD3-22	F	IGHJ3	F	IGHG2	F	CARDSYYYDTSGNRFDDLFDVW	in-frame	371	0	0	0	0	0	0	0	0	371	0
IGHV3-11	F	x	x	IGHJ6	F	IGHG1	F	CARNKLLVIHYYYGMDVW	in-frame	371	0	0	0	0	0	0	0	0	371	0
IGHV1-18	F	x	x	IGHJ4	F	IGHG2	F	CARGYDFSGHDQSGDYW	in-frame	371	370	0	0	1	0	0	0	0	0	0
IGHV4-61	F	x	x	IGHJ5	F	IGHG1	F	CVTEGDCGVNSCFAFDSW	in-frame	370	0	370	0	0	0	0	0	0	0	0
IGHV3-74	F	x	x	IGHJ5,IGHJ4	F	IGHG2	F	CSRDLFGREEIW	in-frame	370	0	0	0	0	0	0	0	0	0	370
IGHV3-7,IGHV3-69-1,IGHV3-48,IGHV3-21	F	IGHD6-13	F	IGHJ3	F	IGHG1	F	CARDLGIAADVAFDIW	in-frame	368	0	0	0	0	0	368	0	0	0	0
IGHV4/OR15-8	ORF	x	x	IGHJ6	F	IGHG1	F	CAREWYSRMGVW	in-frame	367	0	367	0	0	0	0	0	0	0	0
IGHV4-34	F	IGHD3-10	F	IGHJ4	F	IGHG1	F	CARGGYNFDSGNYPPRAFGHYW	in-frame	366	0	366	0	0	0	0	0	0	0	0
IGHV4-39	F	x	x	IGHJ5	F	IGHG1	F	CARQRMAVAGPFRNWFDPW	in-frame	365	0	0	365	0	0	0	0	0	0	0
IGHV4-61	F	IGHD4-23	ORF	IGHJ5	F	IGHG2	F	CVGLLAGYGGKGPW	in-frame	364	0	364	0	0	0	0	0	0	0	0
IGHV1-18	F	x	x	IGHJ5	F	IGHG1	F	CARDESYYDESPGGYNWFDPW	in-frame	364	0	0	0	0	0	0	0	0	364	0
IGHV3-30	F	x	x	IGHJ5	F	IGHG2	F	CARDGLPYDGDGNWLGLW	in-frame	362	362	0	0	0	0	0	0	0	0	0
IGHV3-11	F	IGHD3-22,IGHD3-3	F	IGHJ4	F	IGHG3	F	CARDRSGYSDLDYW	in-frame	362	362	0	0	0	0	0	0	0	0	0
IGHV2-70D,IGHV2-70	F	IGHD3-10	F	IGHJ3	F	IGHG1	F	CARICYYGSGSYMAFDIW	in-frame	362	0	0	362	0	0	0	0	0	0	0
IGHV7-4-1	F	x	x	IGHJ5,IGHJ4	F	IGHG1	F	CARDGRGRLFGFDHW	in-frame	361	0	0	361	0	0	0	0	0	0	0
IGHV6-1	F	x	x	IGHJ5	F	IGHG2	F	CARTGGGQWLPRTWFDSW	in-frame	361	0	0	0	0	0	0	0	0	361	0
IGHV1-18	F	IGHD2-15	F	IGHJ5	F	IGHG2	F	CARDLGYCSGGRCNRQWFDPW	in-frame	361	0	0	0	361	0	0	0	0	0	0
IGHV3-74	F	x	x	IGHJ5,IGHJ4	F	IGHG1	F	CATPHLYDRPGR*W	out-of-frame	360	0	0	360	0	0	0	0	0	0	0
IGHV4-30-4	F	x	x	IGHJ3	F	IGHG2	F	CARGHQLLWAFDIW	in-frame	359	0	0	0	0	0	0	0	0	359	0
IGHV3-9	F	x	x	IGHJ1	F	IGHG2	F	CAKDKGGSPGLHFQHW	in-frame	359	0	0	0	0	0	0	0	0	359	0
IGHV3-23	F	IGHD3-22	F	IGHJ3	F	IGHG1	F	CAKVSGDYYDAFDIW	in-frame	359	0	0	0	0	0	359	0	0	0	0
IGHV4-39	F	x	x	IGHJ5	F	IGHG1	F	CARRVSLPAAADNWFDPW	in-frame	358	0	0	0	0	0	0	358	0	0	0
IGHV1-18	F	x	x	IGHJ5	F	IGHG1	F	CARGSGSRGHIGYFDPW	in-frame	358	0	0	0	0	0	0	0	358	0	0
IGHV3-53	F	x	x	IGHJ6	F	IGHG2	F	CARGGWGTVMDVW	in-frame	357	0	0	0	0	357	0	0	0	0	0
IGHV3-48	F	x	x	IGHJ4	F	IGHG2	F	CARRILLPDRGGLDYW	in-frame	356	356	0	0	0	0	0	0	0	0	0
IGHV3-23D	F	x	x	IGHJ5	F	IGHG2	F	CAKGGWGTVFDHW	in-frame	356	0	0	0	356	0	0	0	0	0	0
IGHV3-69-1,IGHV3-48	P	IGHD5-12	F	IGHJ3	F	IGHG1	F	CARANSGYERDAFDIW	in-frame	355	0	0	0	0	0	355	0	0	0	0
IGHV3-9	F	x	x	IGHJ3	F	IGHG2	F	CAKDGGSGQNGAFDIW	in-frame	351	0	0	351	0	0	0	0	0	0	0
IGHV4-61	F	x	x	IGHJ4	F	IGHG1	F	CARDGRYPNYFDYW	in-frame	350	0	0	0	0	0	350	0	0	0	0
IGHV1-18	F	x	x	IGHJ6	F	IGHG1	F	CARGAGITIFEALDVW	in-frame	350	0	0	0	0	0	350	0	0	0	0
IGHV3-9	F	x	x	IGHJ6	F	IGHG2	F	CVKDLLPGGADVW	in-frame	349	348	0	0	0	0	0	0	0	0	1
IGHV3-64,IGHV3-30-3,IGHV3-30	F	IGHD3-22	F	IGHJ4	F	IGHG1	F	CASSVRYYDSNGFYPYYFDSW	in-frame	349	0	349	0	0	0	0	0	0	0	0
IGHV4-59	F	x	x	IGHJ5	F	IGHG2	F	CVRGRNWFDPW	in-frame	348	348	0	0	0	0	0	0	0	0	0
IGHV4-59	F	x	x	IGHJ6	F	IGHG2	F	CARGGGTVSRPYYYYMDVW	in-frame	347	0	0	0	0	0	0	0	0	347	0
IGHV4-59	F	x	x	IGHJ5	F	IGHG1	F	CARGGSSKHYSSW	in-frame	347	0	0	0	0	0	0	0	0	347	0
IGHV1-18	F	IGHD3-10	F	IGHJ4	F	IGHG1	F	CASSSHYYGSGTYTALNYW	in-frame	347	0	0	0	0	0	347	0	0	0	0
IGHV3-15	F	x	x	IGHJ4	F	IGHG2	F	CTTDRSYFRVRGAYW	in-frame	346	346	0	0	0	0	0	0	0	0	0
IGHV3-23	F	IGHD6-13	F	IGHJ4	F	IGHG1	F	CAKVGSSSWFKAPFDYW	in-frame	344	0	0	344	0	0	0	0	0	0	0
IGHV5-51	F	x	x	IGHJ4	F	IGHG2	F	CARQGGYGWRVIDYW	in-frame	343	0	0	0	0	0	0	0	0	343	0
IGHV2-70D,IGHV2-70	F	IGHD2-21	F	IGHJ4	F	IGHG1	F	CARMRKGGGDCYQLDSW	in-frame	342	0	0	0	0	0	0	0	0	342	0
IGHV3-23D	F	IGHD1-26	F	IGHJ5	F	IGHG2	F	CAKRLIVGPTKGPFDPW	in-frame	339	339	0	0	0	0	0	0	0	0	0
IGHV3-7	F	IGHD3-22	F	IGHJ6	F	IGHG1	F	CARAFYDTSGYYPYGMDVW	in-frame	338	0	0	0	0	0	0	0	0	338	0
IGHV3-23D	F	x	x	IGHJ4	F	IGHG2	F	CAKRPAAVGKFFDYW	in-frame	338	338	0	0	0	0	0	0	0	0	0
IGHV1-3	F	IGHD3-22	F	IGHJ4	F	IGHG2	F	CAREWASGYYDSSGAIDYW	in-frame	338	0	0	0	0	0	338	0	0	0	0
IGHV4-4	F	x	x	IGHJ4	F	IGHG1	F	CAREGIAAVHCDYW	in-frame	337	0	0	337	0	0	0	0	0	0	0
IGHV3-33	F	x	x	IGHJ4	F	IGHG2	F	CARETRYNFDFW	in-frame	337	0	0	0	0	0	0	0	0	337	0
IGHV1-3	F	IGHD4-23	ORF	IGHJ4	F	IGHG2	F	CVRGFGDFGGNPRDYW	in-frame	337	0	0	0	0	0	0	0	0	337	0
IGHV3-9	F	x	x	IGHJ2	F	IGHG2	F	CAKDVRPIWSTQWYWYFDLW	in-frame	336	336	0	0	0	0	0	0	0	0	0
IGHV3-74	F	x	x	IGHJ6	F	IGHG2	F	CARAGGYEYIHRYFYGLDVW	in-frame	336	336	0	0	0	0	0	0	0	0	0
IGHV3-23D	F	IGHD3-9	F	IGHJ4	F	IGHG1	F	CAKDTERLRYFDWLPPSFDSW	in-frame	336	0	0	0	0	0	336	0	0	0	0
IGHV2-5	F	IGHD3-10	F	IGHJ4	F	IGHG1	F	CAHKGYYDSGSYSRYYFDYW	in-frame	336	0	0	0	0	0	0	0	336	0	0
IGHV3-74	F	IGHD3-22	F	IGHJ5,IGHJ4	F	IGHG1	F	CARGAPYDSSGSWW	in-frame	335	0	0	0	0	0	0	0	0	335	0
IGHV3-48	F	x	x	IGHJ4	F	IGHG2	F	CARRSDGSYPFDYW	in-frame	335	0	0	0	0	0	0	0	0	0	335
IGHV1-8	F	x	x	IGHJ5	F	IGHG2	F	CARAKIRGPEVALSDSW	in-frame	335	0	0	0	0	0	0	0	0	335	0
IGHV1-18	F	IGHD6-19	F	IGHJ5	F	IGHG2	F	CARDGAHGSGWYPW	in-frame	335	0	0	0	0	0	0	0	0	335	0
IGHV1-18	F	IGHD5-12	F	IGHJ4	F	IGHG2	F	CARGIDYSGHDQSGDYW	in-frame	335	335	0	0	0	0	0	0	0	0	0
IGHV3-23D	F	x	x	IGHJ4	F	IGHG2	F	CTIILNGYFEYW	in-frame	334	0	0	334	0	0	0	0	0	0	0
IGHV3-15	F	x	x	IGHJ6	F	IGHG1	F	CTTYRSPIYNYYAMDVW	in-frame	334	0	0	0	0	0	334	0	0	0	0
IGHV1-18	F	x	x	IGHJ4	F	IGHG1	F	CVRDSDYRGRGSLWFGEEIYYSFDYW	in-frame	334	0	0	0	0	0	334	0	0	0	0
IGHV3-23D	F	x	x	IGHJ4	F	IGHG2	F	CAKDRSGGTYDLDSW	in-frame	333	0	0	0	0	0	0	0	0	0	333
IGHV3-74	F	IGHD3-22	F	IGHJ3	F	IGHG2	F	CAILEGITPIVDLNDDFDVW	in-frame	332	332	0	0	0	0	0	0	0	0	0
IGHV1-3	F	x	x	IGHJ4	F	IGHG2	F	CVRRGDGSNYDYW	in-frame	331	0	0	0	0	0	0	0	331	0	0
IGHV4-61,IGHV4-59	F	x	x	IGHJ6	F	IGHG2	F	CAHYEYTSGTHVW	in-frame	330	0	0	0	0	0	0	0	0	330	0
IGHV3-7	F	x	x	IGHJ5,IGHJ4	F	IGHG2	F	CTTGHWRDSSGW	in-frame	330	0	0	0	0	0	0	0	0	0	330
IGHV1-18	F	x	x	IGHJ6	F	IGHG2	F	CARDRLGGYMDVW	in-frame	330	0	0	0	0	330	0	0	0	0	0
IGHV1-18	F	IGHD4-17	F	IGHJ3	F	IGHG1	F	CARDGDYGTSHDAFEIW	in-frame	330	0	0	0	0	0	0	0	0	330	0
IGHV2-5	F	x	x	IGHJ5	F	IGHG1	F	CAHRILSGAAAGHNWFDPW	in-frame	329	0	0	0	0	0	0	0	0	329	0
IGHV1-18	F	x	x	IGHJ4	F	IGHG2	F	CARGQNGVRSFLDYW	in-frame	329	329	0	0	0	0	0	0	0	0	0
IGHV3-15	F	IGHD5-24	ORF	IGHJ4	F	IGHG1	F	CLTDRDGYNYFDYW	in-frame	326	0	0	0	0	0	326	0	0	0	0
IGHV1-3	F	x	x	IGHJ1	F	IGHG2	F	CARGAWYFTPEAHW	in-frame	326	326	0	0	0	0	0	0	0	0	0
IGHV4-61,IGHV4-4	F	IGHD5-5,IGHD5-18	F	IGHJ4	F	IGHG2	F	CARESRDGYSNGPDYW	in-frame	325	0	1	0	0	0	0	0	0	324	0
IGHV4-59	F	x	x	IGHJ5	F	IGHG1	F	CARLLAVYGTGRPNWLDPW	in-frame	325	0	0	325	0	0	0	0	0	0	0
IGHV4-59	F	IGHD3-22	F	IGHJ2	F	IGHG2	F	CARPKSYSSGYYAAEFW	in-frame	325	0	0	0	0	0	325	0	0	0	0
IGHV4-39	F	x	x	IGHJ4	F	IGHG2	F	CARGHGSPPPARLSDKW	in-frame	325	0	0	0	0	0	0	0	0	325	0
IGHV4-34,IGHV4-31	F	x	x	IGHJ6	F	IGHG1	F	CARGRAGMDVW	in-frame	325	0	0	0	0	0	0	0	0	325	0
IGHV3-53	F	IGHD4-17	F	IGHJ4	F	IGHG2	F	CAREEYGDYLGLW	in-frame	325	0	0	0	0	0	0	0	0	0	325
IGHV2-5	F	IGHD3-10	F	IGHJ4	F	IGHG1	F	CTHRVTYYSGSGTSEEYYFDYW	in-frame	325	0	0	0	0	0	325	0	0	0	0
IGHV4-61	F	IGHD2-15	F	IGHJ5	F	IGHG1	F	CARASYCTGASCYSNWFDPW	in-frame	324	0	0	324	0	0	0	0	0	0	0
IGHV3-33	F	IGHD3-22	F	IGHJ4	F	IGHG2	F	CARFLGSDRSGYFDYW	in-frame	324	0	0	0	0	0	324	0	0	0	0
IGHV3-23D	F	x	x	IGHJ4	F	IGHG2	F	CAKGITVTPPTRAFDSW	in-frame	324	0	0	0	0	0	0	0	324	0	0
IGHV3-15	F	IGHD2-2	F	IGHJ6	F	IGHG1	F	CTTVGYCDSASWSGAGSCSYFYYYMDVW	in-frame	324	0	0	0	0	0	0	324	0	0	0
IGHV1-2	F	x	x	IGHJ5	F	IGHG1	F	CARDPDAGFDPW	in-frame	324	0	324	0	0	0	0	0	0	0	0
IGHV3-9	F	x	x	IGHJ2	F	IGHG2	F	CAKGQQPRDRIGYFDFW	in-frame	323	323	0	0	0	0	0	0	0	0	0
IGHV3-73	F	IGHD3-10	F	IGHJ4	F	IGHG1	F	CTYGSGSYSEYW	in-frame	322	0	0	0	0	0	322	0	0	0	0
IGHV1-18	F	x	x	IGHJ3	F	IGHG1	F	CARARGYFGSRNYYNEHAFDIW	in-frame	322	0	0	322	0	0	0	0	0	0	0
IGHV5-51	F	IGHD2-15	F	IGHJ4	F	IGHG2	F	CARLGSEDCSGGSCFDYW	in-frame	321	0	0	0	0	0	0	0	0	321	0
IGHV4-34,IGHV4-31	F	x	x	IGHJ4	F	IGHG2	F	CATGSRWETLLQYW	in-frame	321	0	0	321	0	0	0	0	0	0	0
IGHV3-73	F	x	x	IGHJ4	F	IGHG2	F	CARQTNSCHDYW	in-frame	321	2	0	0	0	0	0	0	0	319	0
IGHV2-26	F	x	x	IGHJ4	F	IGHG1	F	CVRVHFESSTHYFDYW	in-frame	321	0	0	0	0	0	0	0	0	0	321
IGHV4-55,IGHV4-4	P	x	x	IGHJ4	F	IGHG1	F	CARGPQNAASFYGYW	in-frame	320	0	0	0	0	0	0	0	0	320	0
IGHV3-7	F	x	x	IGHJ6	F	IGHG1	F	CARGKYGMDVW	in-frame	320	0	0	0	0	0	0	0	0	320	0
IGHV3-13	F	x	x	IGHJ3	F	IGHG2	F	CARGLDAFDLW	in-frame	319	0	0	0	0	0	0	0	319	0	0
IGHV1-18	F	x	x	IGHJ4	F	IGHG2	F	CARGSYGQVALDFW	in-frame	319	319	0	0	0	0	0	0	0	0	0
IGHV4-59	F	x	x	IGHJ4	F	IGHG2	F	CAGGYSDWSALTYW	in-frame	318	0	0	0	0	0	0	0	0	318	0
IGHV2-5	F	x	x	IGHJ4	F	IGHG2	F	CAHTIGKWLGPDYW	in-frame	318	0	0	0	0	0	0	0	318	0	0
IGHV2-5	F	x	x	IGHJ3	F	IGHG2	F	CAHRLFYWNAFDTW	in-frame	318	0	0	0	318	0	0	0	0	0	0
IGHV1-3	F	x	x	IGHJ3	F	IGHG2	F	CARDDPYSNGWPVNFW	in-frame	318	0	0	318	0	0	0	0	0	0	0
IGHV1-18	F	x	x	IGHJ3	F	IGHG1	F	CARTKQQLVRGIDAFDMW	in-frame	318	318	0	0	0	0	0	0	0	0	0
IGHV4-39	F	x	x	IGHJ5	F	IGHG2	F	CARLRHEPQVHWGWSDPW	in-frame	317	0	0	0	0	0	0	0	0	317	0
IGHV4-34	F	IGHD5-24	ORF	IGHJ2	F	IGHG1	F	CARKRRWLQLSNWYFDLW	in-frame	317	0	0	0	0	0	317	0	0	0	0
IGHV4-30-2	F	IGHD5/OR15-5b,IGHD5/OR15-5a	ORF	IGHJ5	F	IGHG1	F	CARTSIVSTIGTRNYFDPW	in-frame	317	317	0	0	0	0	0	0	0	0	0
IGHV3-11	F	IGHD3-16	F	IGHJ3	F	IGHG3	F	CARGVHDYVWGSYREIGFDIW	in-frame	317	317	0	0	0	0	0	0	0	0	0
IGHV4-34	F	IGHD3-3	F	IGHJ6	F	IGHG1	F	CARGRMGYDFWSGSIDYYYYGMDVW	in-frame	316	0	0	0	0	0	0	0	0	316	0
IGHV7-4-1	F	x	x	IGHJ6	F	IGHG2	F	CARGWQIHTYYYYYYMDVW	in-frame	315	0	0	0	0	0	0	0	315	0	0
IGHV3-74	F	x	x	IGHJ6	F	IGHG2	F	CASPVTTYSPASKFFHGIDIW	in-frame	315	315	0	0	0	0	0	0	0	0	0
IGHV3-20,IGHV3-9	ORF	x	x	IGHJ4	F	IGHG1	F	CVRAVAANLEATFDNHFDYW	in-frame	315	0	0	0	0	0	315	0	0	0	0
IGHV1-18	F	x	x	IGHJ2	F	IGHG1	F	CARGKGYFDLW	in-frame	315	0	0	0	0	0	0	0	0	315	0
IGHV4-59	F	IGHD3-10	F	IGHJ4	F	IGHG1	F	CARGNYGSGSYFDYW	in-frame	314	0	0	0	0	0	314	0	0	0	0
IGHV3-74	F	x	x	IGHJ5	F	IGHG1	F	CVGGDTYSGIFWFDPW	in-frame	314	314	0	0	0	0	0	0	0	0	0
IGHV2-5	F	x	x	IGHJ5	F	IGHG1	F	CAHWHNWKGWFDPW	in-frame	314	0	0	0	0	0	0	0	0	314	0
IGHV2-5	F	IGHD6-13	F	IGHJ4	F	IGHG2	F	CAHVVSGSWYPPLDYW	in-frame	314	0	0	0	314	0	0	0	0	0	0
IGHV3-9	F	x	x	IGHJ4	F	IGHG2	F	CAKDMDFREGLHCW	in-frame	313	313	0	0	0	0	0	0	0	0	0
IGHV2-5	F	x	x	IGHJ4	F	IGHG2	F	CAHFVGQLAFDHW	in-frame	313	0	0	0	0	0	0	0	313	0	0
IGHV3-15	F	IGHD2-15	F	IGHJ6	F	IGHG2	F	CTTDPHCSGGSCYSRYGMDVW	in-frame	312	0	0	0	0	0	0	0	0	312	0
IGHV4-61,IGHV4-59,IGHV4-38-2,IGHV4-30-2	F	x	x	IGHJ2	F	IGHG1	F	CASRIGVDTLRASYWYFDLW	in-frame	311	0	0	0	311	0	0	0	0	0	0
IGHV4-34,IGHV4-31	F	IGHD2-2	F	IGHJ2	F	IGHG1	F	CAREAVVVPGGLNVW	in-frame	311	0	0	0	0	0	0	0	0	311	0
IGHV4-30-2	F	x	x	IGHJ5,IGHJ4	F	IGHG1	F	CGVGTGSGNYYSEDSW	in-frame	311	0	0	0	0	0	0	0	0	311	0
IGHV3-20	ORF	x	x	IGHJ6	F	IGHG1	F	CVRELGSKDQLLSYGMDVW	in-frame	311	0	0	0	0	0	0	0	0	311	0
IGHV4-59	F	x	x	IGHJ4	F	IGHG2	F	CVRGAGWTPDNW	in-frame	310	0	0	0	0	0	0	0	0	310	0
IGHV3-9	F	x	x	IGHJ3	F	IGHG1	F	CAKVMTGYFDSDGYPPGAFDCW	in-frame	310	0	0	0	0	0	0	0	0	310	0
IGHV3-73	F	IGHD6-19	F	IGHJ5,IGHJ4	F	IGHG1	F	CTRSVAGQWLASW	in-frame	310	0	0	0	0	0	0	0	0	310	0
IGHV4-61	F	x	x	IGHJ4	F	IGHG2	F	CAGERAAGQIDFW	in-frame	309	0	309	0	0	0	0	0	0	0	0
IGHV3-74	F	x	x	IGHJ6	F	IGHG2	F	CARDNSYSVDVW	in-frame	309	0	0	0	0	0	0	0	0	309	0
IGHV3-23D	F	IGHD2-2	F	IGHJ4	F	IGHG2	F	CAKGVLGYCSSSSCYAYDCW	in-frame	309	0	0	0	309	0	0	0	0	0	0
IGHV4-39	F	x	x	IGHJ4	F	IGHG3	F	CARHSGSFPAGHFDTW	in-frame	308	0	0	0	0	0	0	308	0	0	0
IGHV1-8	F	x	x	IGHJ3	F	IGHG2	F	CARDCGTDTAPDDSFDIW	in-frame	308	0	0	0	0	0	308	0	0	0	0
IGHV4-4	F	IGHD2-2	F	IGHJ5	F	IGHG1	F	CAREGQCTSTSCFGEGFDPW	in-frame	307	0	0	0	0	0	0	0	0	307	0
IGHV3-23D	F	x	x	IGHJ4	F	IGHG2	F	CAKGQALESRLDSW	in-frame	307	0	0	0	0	0	307	0	0	0	0
IGHV2-26	F	x	x	IGHJ3	F	IGHG2	F	CARSRGAGSFDVW	in-frame	307	307	0	0	0	0	0	0	0	0	0
IGHV4-61	F	x	x	IGHJ4	F	IGHG2	F	CARRHCSSTRSDDYFAYW	in-frame	306	0	0	0	0	0	306	0	0	0	0
IGHV4-39	F	IGHD1-26	F	IGHJ4	F	IGHG3	F	CARHSGSFPAGYFDNW	in-frame	306	0	0	0	0	0	0	306	0	0	0
IGHV3-7,IGHV3-69-1,IGHV3-48,IGHV3-21	F	x	x	IGHJ4	F	IGHG1	F	CAKSSAAGTRQLDYW	in-frame	306	0	0	306	0	0	0	0	0	0	0
IGHV3-15	F	x	x	IGHJ3	F	IGHG2	F	CAAYNAKDAFKIW	in-frame	306	306	0	0	0	0	0	0	0	0	0
IGHV4-61	F	IGHD2-2	F	IGHJ4	F	IGHG1	F	CARERGICSSDSCQGFYFDDW	in-frame	305	0	0	0	0	0	305	0	0	0	0
IGHV4-59	F	IGHD3-16	F	IGHJ4	F	IGHG1	F	CARSPIRRLGELSPDFDFW	in-frame	305	305	0	0	0	0	0	0	0	0	0
IGHV3-7	F	x	x	IGHJ5,IGHJ1	F	IGHG2	F	CARRGRTTMLLDEHW	in-frame	304	303	0	0	0	0	0	0	0	1	0
IGHV3-69-1,IGHV3-48	P	x	x	IGHJ5	F	IGHG2	F	CTSVDCNAGGCPHSW	in-frame	304	0	304	0	0	0	0	0	0	0	0
IGHV1-69D	F	IGHD6-19	F	IGHJ4	F	IGHG2	F	CATLREDSSSWQEGYYFDYW	in-frame	304	0	0	304	0	0	0	0	0	0	0
IGHV3-74	F	x	x	IGHJ2	F	IGHG2	F	CATDLNWGGFNVW	in-frame	303	0	0	0	0	0	0	0	303	0	0
IGHV3-7,IGHV3-69-1,IGHV3-48,IGHV3-21	F	x	x	IGHJ5	F	IGHG2	F	CAGDPAQYLRSGWFDPW	in-frame	303	0	0	0	0	303	0	0	0	0	0
IGHV3-66	F	x	x	IGHJ4	F	IGHG2	F	CARDHNFDGDYW	in-frame	302	0	0	0	0	0	0	0	0	302	0
IGHV3-43	F	x	x	IGHJ6	F	IGHG1	F	CAKDSKRKVVRDHGMDVW	in-frame	302	302	0	0	0	0	0	0	0	0	0
IGHV3-23D	F	IGHD3-22	F	IGHJ4	F	IGHG2	F	CAKVRSVVVVNNPSDCW	in-frame	302	0	0	0	0	0	0	0	0	302	0
IGHV4-39	F	x	x	IGHJ5	F	IGHG3	F	CARLAGSYGAGWFDPW	in-frame	301	0	0	0	0	0	0	301	0	0	0
IGHV4-39	F	x	x	IGHJ4	F	IGHG3	F	CARHYGNSWLYW	in-frame	301	0	0	0	0	0	301	0	0	0	0
IGHV3-15	F	IGHD3-10	F	IGHJ4	F	IGHG2	F	CTTERYSDGSGNYYNWVYW	in-frame	301	0	0	301	0	0	0	0	0	0	0
IGHV1-46	F	IGHD6-13	F	IGHJ4	F	IGHG1	F	CAKPLIATAGRGFDFW	in-frame	301	0	301	0	0	0	0	0	0	0	0
IGHV4-39	F	IGHD3-10	F	IGHJ4	F	IGHG2	F	CASHFTYYYGSGSYYLWGYYFDYW	in-frame	300	0	0	0	0	0	300	0	0	0	0
IGHV3-23D	F	x	x	IGHJ2	F	IGHG2	F	CAKEKASGYWYFDLW	in-frame	300	300	0	0	0	0	0	0	0	0	0
IGHV3-23D	F	IGHD5-5,IGHD5-18	F	IGHJ4	F	IGHG2	F	CAKVNPREYSYGFDYW	in-frame	300	0	0	0	0	0	0	0	0	300	0
IGHV4-59,IGHV4-4	F	IGHD3-10	F	IGHJ3	F	IGHG1	F	CARGLTTLRGLIMGDDAFDIW	in-frame	299	0	0	0	0	0	0	0	0	299	0
IGHV3-64,IGHV3-30-3,IGHV3-30	F	x	x	IGHJ3	F	IGHG2	F	CARENYYITDTKIIGALDIW	in-frame	299	0	0	0	0	0	0	0	0	299	0
IGHV3-64	F	x	x	IGHJ4	F	IGHG2	F	CARDHNFDGDYW	in-frame	299	0	0	0	0	0	0	0	0	299	0
IGHV3-23D	F	x	x	IGHJ4	F	IGHG2	F	CARYRGFRMANYYFDYW	in-frame	299	0	0	0	0	0	299	0	0	0	0
IGHV2-70D,IGHV2-70	F	x	x	IGHJ3	F	IGHG3	F	CARIRAPTTMTWSGAFDIW	in-frame	299	299	0	0	0	0	0	0	0	0	0
IGHV1-46	F	x	x	IGHJ4	F	IGHG2	F	CAREEPPASSTAGLNWGDYW	in-frame	298	0	0	0	0	0	0	0	0	298	0
IGHV3-23D,IGHV3-23	F	x	x	IGHJ4	F	IGHG2	F	CAKRSSRANYHFDYW	in-frame	297	0	0	0	0	0	0	0	0	297	0
IGHV3-23D	F	IGHD6-13	F	IGHJ4	F	IGHG2	F	CAKKLAYRSSWYYFDYW	in-frame	297	0	0	0	0	0	297	0	0	0	0
IGHV1-18	F	x	x	IGHJ4	F	IGHG2	F	CAKAGRTTHYYFDYW	in-frame	297	297	0	0	0	0	0	0	0	0	0
IGHV1-18	F	IGHD6-19	F	IGHJ5	F	IGHG1	F	CARDRSGWYSDLW	in-frame	297	0	0	0	0	0	0	0	0	297	0
IGHV1-18	F	IGHD3-16	F	IGHJ3	F	IGHG2	F	CARPYDYSWGSYRYVAFDVW	in-frame	297	0	0	297	0	0	0	0	0	0	0
IGHV4-61,IGHV4-59	F	x	x	IGHJ5	F	IGHG2	F	CARNPNYGEDPWVWFDTW	in-frame	296	0	0	0	0	0	0	0	296	0	0
IGHV3-48	F	x	x	IGHJ4	F	IGHG1	F	CVREPYTSGLYYFDYW	in-frame	296	0	0	0	0	0	0	0	0	296	0
IGHV3-43	F	x	x	IGHJ4	F	IGHG3	F	CAKQGPGVRGNFDYW	in-frame	296	296	0	0	0	0	0	0	0	0	0
IGHV3-23D	F	IGHD6-19	F	IGHJ4	F	IGHG2	F	CAKDQVTAVAGIFSYW	in-frame	296	0	0	0	296	0	0	0	0	0	0
IGHV4-4	F	x	x	IGHJ5	F	IGHG2	F	CARDGSGWFEGWFDPW	in-frame	295	0	0	0	295	0	0	0	0	0	0
IGHV3-9	F	IGHD5-5,IGHD5-18	F	IGHJ4	F	IGHG2	F	CAKGRTHTAMTAFDYW	in-frame	295	0	0	295	0	0	0	0	0	0	0
IGHV3-23D	F	x	x	IGHJ4	F	IGHG2	F	CAKAPPRTRKFDWW	in-frame	295	295	0	0	0	0	0	0	0	0	0
IGHV3-9	F	x	x	IGHJ4	F	IGHG2	F	CVKDIVPGGADYW	in-frame	294	294	0	0	0	0	0	0	0	0	0
IGHV3-11	F	x	x	IGHJ4	F	IGHG2	F	CARGLYGSSWYGIDHW	in-frame	294	294	0	0	0	0	0	0	0	0	0
IGHV4-61,IGHV4-38-2,IGHV4-30-2	F	x	x	IGHJ4	F	IGHG2	F	CTRESRDGYHNGPDYW	in-frame	293	0	0	0	0	0	0	0	0	293	0
IGHV1-3	F	x	x	IGHJ3	F	IGHG2	F	CARERAWWDDFDIW	in-frame	293	0	0	0	293	0	0	0	0	0	0
IGHV1-18	F	IGHD3-9	F	IGHJ3	F	IGHG1	F	CATSDDSDYDILTGEDGFDIW	in-frame	293	0	0	293	0	0	0	0	0	0	0
IGHV3-9	F	x	x	IGHJ6	F	IGHG1	F	CVKTRGKIVAGLYNYGMDVW	in-frame	292	292	0	0	0	0	0	0	0	0	0
IGHV3-9	F	x	x	IGHJ3	F	IGHG1	F	CAKDRFVQGAFDIW	in-frame	292	0	0	0	0	0	0	0	292	0	0
IGHV3-7,IGHV3-69-1,IGHV3-48,IGHV3-21	F	x	x	IGHJ4	F	IGHG2	F	CARDGHYSDNSPFYPDYW	in-frame	292	0	0	0	292	0	0	0	0	0	0
IGHV3-7	F	IGHD5-12	F	IGHJ4	F	IGHG1	F	CARSGYSGYEWAYYFDYW	in-frame	291	0	0	0	0	0	291	0	0	0	0
IGHV4-39	F	x	x	IGHJ5	F	IGHG3	F	CARQRVTGRLPYFDPW	in-frame	290	290	0	0	0	0	0	0	0	0	0
IGHV3-69-1,IGHV3-48	P	x	x	IGHJ4	F	IGHG2	F	CARDIGPNTFDYW	in-frame	290	0	0	290	0	0	0	0	0	0	0
IGHV3-33	F	x	x	IGHJ4	F	IGHG2	F	CARGGTVSGTGRRHLDYW	in-frame	290	0	0	0	0	290	0	0	0	0	0
IGHV4-39	F	x	x	IGHJ4	F	IGHG3	F	CASHGGSFPAGYLDNW	in-frame	289	0	0	0	0	0	0	289	0	0	0
IGHV2-70	F	IGHD1-26	F	IGHJ5	F	IGHG1	F	CAHRPIVGATWFDPW	in-frame	289	0	0	0	0	0	0	0	289	0	0
IGHV2-5	F	x	x	IGHJ4	F	IGHG3	F	CAHRIWGASLPDW	in-frame	289	289	0	0	0	0	0	0	0	0	0
IGHV2-26	F	x	x	IGHJ3	F	IGHG1	F	CSRTQWGYDSAWALGAFDVW	in-frame	289	0	0	289	0	0	0	0	0	0	0
IGHV4-4	F	x	x	IGHJ1	F	IGHG2	F	CVRDFGYEFDW	in-frame	288	0	0	0	288	0	0	0	0	0	0
IGHV3-30-3	F	x	x	IGHJ4	F	IGHG2	F	CARDHDSAEDFW	in-frame	288	0	0	0	0	0	0	0	0	288	0
IGHV3-23D,IGHV3-23	F	x	x	IGHJ4	F	IGHG1	F	CAKAPRAGVFGGFEYW	in-frame	288	0	288	0	0	0	0	0	0	0	0
IGHV6-1	F	x	x	IGHJ4	F	IGHG2	F	CARSHRGPFDYW	in-frame	286	0	286	0	0	0	0	0	0	0	0
IGHV4-39	F	x	x	IGHJ5	F	IGHG4	F	CTRNSTYWRWFDPW	in-frame	286	0	0	0	0	286	0	0	0	0	0
IGHV3-23D	F	x	x	IGHJ4	F	IGHG2	F	CARRGVVPGRNLYYFDYW	in-frame	286	0	0	0	0	0	0	0	0	286	0
IGHV4-59	F	x	x	IGHJ5	F	IGHG2	F	CARQWLFTGPNNWFDPW	in-frame	285	0	0	285	0	0	0	0	0	0	0
IGHV3-43	F	x	x	IGHJ4	F	IGHG2	F	CVKEIRGTRWVTFDYW	in-frame	285	285	0	0	0	0	0	0	0	0	0
IGHV3-15	F	x	x	IGHJ3	F	IGHG2	F	CTTYSTKAALNFW	in-frame	284	0	0	0	0	0	0	0	284	0	0
IGHV3-64,IGHV3-33,IGHV3-30-3	F	x	x	IGHJ4	F	IGHG2	F	CVREAYYHPSSPPTFYFDHW	in-frame	283	283	0	0	0	0	0	0	0	0	0
IGHV2-70D,IGHV2-70	F	x	x	IGHJ4	F	IGHG1	F	CARQIQLIWDPLDYW	in-frame	283	0	0	0	0	0	0	283	0	0	0
IGHV2-5	F	x	x	IGHJ5	F	IGHG2	F	CALLATAGRGGWFDPW	in-frame	283	0	0	0	0	0	0	0	283	0	0
IGHV4-39	F	x	x	IGHJ5	F	IGHG2	F	CARRVGDWVTNWFDPW	in-frame	282	0	0	0	282	0	0	0	0	0	0
IGHV3-23D	F	IGHD4-17	F	IGHJ5	F	IGHG2	F	CTKKMTTATTDWFDPW	in-frame	282	0	0	0	0	0	0	0	0	0	282
IGHV2-5	F	x	x	IGHJ4	F	IGHG1	F	CAHRRAIRGVYFDYW	in-frame	282	0	0	0	0	0	0	0	282	0	0
IGHV4-34,IGHV4-31	F	x	x	IGHJ4	F	IGHG1	F	CARAWDSRGSAKFDYW	in-frame	281	0	0	0	0	0	0	0	0	0	281
IGHV3-72	F	x	x	IGHJ4	F	IGHG2	F	CARYRSAWYVDYW	in-frame	281	281	0	0	0	0	0	0	0	0	0
IGHV2-5	F	IGHD3-22	F	IGHJ4	F	IGHG1	F	CAHGRLSYYFSSGSPPLEYW	in-frame	281	281	0	0	0	0	0	0	0	0	0
IGHV1-3	F	IGHD4-17	F	IGHJ4	F	IGHG1	F	CARTPSDYGDYYFDLW	in-frame	281	281	0	0	0	0	0	0	0	0	0
IGHV4-61	F	x	x	IGHJ4	F	IGHG1	F	CARQEWLGANFDCW	in-frame	280	0	0	0	0	0	280	0	0	0	0
IGHV4-39	F	IGHD3-10	F	IGHJ4	F	IGHG1	F	CARLLVDGSGSYTWLAVYFDYW	in-frame	280	0	0	0	0	0	280	0	0	0	0
IGHV3-NL1,IGHV3-30-5,IGHV3-30-3,IGHV3-30	F	x	x	IGHJ4	F	IGHG2	F	CAKESHNNGYGSYFDSW	in-frame	280	0	0	0	0	0	0	0	0	280	0
IGHV5-51	F	x	x	IGHJ4	F	IGHG1	F	CARLEGSRLENW	in-frame	279	279	0	0	0	0	0	0	0	0	0
IGHV3-23D	F	x	x	IGHJ6	F	IGHG2	F	CAKRLGIGYYYYGMDVW	in-frame	279	0	0	0	0	0	0	0	0	0	279
IGHV2-5	F	x	x	IGHJ4	F	IGHG2	F	CAHAFDRAGYFAYYFVSW	in-frame	279	0	0	0	0	0	0	0	0	279	0
IGHV1-3	F	IGHD6-19	F	IGHJ4	F	IGHG2	F	CAREFSGYSSGWYYFDYW	in-frame	279	0	0	279	0	0	0	0	0	0	0
IGHV1-18	F	x	x	IGHJ4	F	IGHG1	F	CARALEPSRPCDYW	in-frame	279	0	0	0	0	0	0	0	0	279	0
IGHV3-72	F	IGHD4-17	F	IGHJ6	F	IGHG2	F	CVRSPHSGNNGDYYYYYMDVW	in-frame	278	0	0	0	0	0	0	0	0	278	0
IGHV1-3	F	IGHD6-19	F	IGHJ4	F	IGHG2	F	CARSSGWWAFDFW	in-frame	278	0	0	0	0	278	0	0	0	0	0
IGHV3-9	F	IGHD3-10	F	IGHJ3	F	IGHG1	F	CVKDRHYGSGTFSSGAFDVW	in-frame	277	0	0	0	0	0	277	0	0	0	0
IGHV3-23	F	x	x	IGHJ2	F	IGHG2	F	CAKDTVVRGYWYFDLW	in-frame	277	0	0	277	0	0	0	0	0	0	0
IGHV1-18	F	x	x	IGHJ6	F	IGHG1	F	CAKEGGSSSWGQSFDSFMDVW	in-frame	277	0	0	0	0	277	0	0	0	0	0
IGHV2-5	F	IGHD6-13	F	IGHJ3	F	IGHG1	F	CAHRTRYSSSWSDW	in-frame	276	0	0	276	0	0	0	0	0	0	0
IGHV4-34	F	x	x	IGHJ5,IGHJ4	F	IGHG1	F	CARGDRRLLDFW	in-frame	275	0	0	0	0	0	0	0	0	275	0
IGHV2-5	F	x	x	IGHJ5	F	IGHG2	F	CARRIYTSGTFARWFDPW	in-frame	275	0	0	275	0	0	0	0	0	0	0
IGHV1-46	F	x	x	IGHJ4	F	IGHG2	F	CAREYRGGHFDYW	in-frame	275	275	0	0	0	0	0	0	0	0	0
IGHV1-18	F	x	x	IGHJ4	F	IGHG1	F	CVRDGPPYFYTSGRWRGDYW	in-frame	275	0	0	0	0	0	275	0	0	0	0
IGHV4-61	F	x	x	IGHJ6	F	IGHG2	F	CARLNEEVLINNFHFHGMDVW	in-frame	274	0	0	274	0	0	0	0	0	0	0
IGHV4-30-4,IGHV4-30-2	F	x	x	IGHJ5	F	IGHG3	F	CARAEGYSGVGAFVRWFDPW	in-frame	274	0	0	0	0	0	0	274	0	0	0
IGHV3-74	F	x	x	IGHJ4,IGHJ1	F	IGHG1	F	CARDLSGADDFW	in-frame	274	0	0	0	0	274	0	0	0	0	0
IGHV3-23D	F	x	x	IGHJ3	F	IGHG2	F	CAKCSSSRGNDALDIW	in-frame	274	0	0	0	0	0	0	0	0	274	0
IGHV3-23D	F	IGHD3-10	F	IGHJ4	F	IGHG2	F	CAKEEHYYGPGSSGRDLDYW	in-frame	274	0	0	274	0	0	0	0	0	0	0
IGHV1-24	F	IGHD1-26	F	IGHJ5	F	IGHG1	F	CATQGPYSGSYGLDSW	in-frame	274	274	0	0	0	0	0	0	0	0	0
IGHV3-74	F	x	x	IGHJ4	F	IGHG2	F	CARDANAEPYDYW	in-frame	273	273	0	0	0	0	0	0	0	0	0
IGHV3-7,IGHV3-9,IGHV3-21,IGHV3-11	F	x	x	IGHJ5	F	IGHG2	F	CARGQKGSGGRKDWFESW	in-frame	273	0	0	0	0	0	0	0	0	273	0
IGHV3-48	F	x	x	IGHJ3	F	IGHG2	F	CARDGVGVSPGDVFDIW	in-frame	273	0	0	0	0	0	0	0	0	273	0
IGHV3-15	F	x	x	IGHJ4	F	IGHG1	F	CSTDGLVITPPHYW	in-frame	273	0	0	0	0	0	0	273	0	0	0
IGHV3-53	F	x	x	IGHJ3	F	IGHG1	F	CARGRASAYAFDIW	in-frame	272	0	0	0	0	0	0	0	0	272	0
IGHV3-48	F	IGHD3-22	F	IGHJ6	F	IGHG2	F	CWINLPSHYDSLYMDVW	in-frame	272	0	0	0	0	0	0	0	0	272	0
IGHV3-11	F	x	x	IGHJ6	F	IGHG3	F	CARDFGPSGGMDVW	in-frame	272	0	0	0	0	0	0	0	0	272	0
IGHV3-11	F	x	x	IGHJ6	F	IGHG1	F	CARDGIDGVDVW	in-frame	272	0	0	0	0	0	0	0	0	272	0
IGHV2-5	F	x	x	IGHJ4	F	IGHG2	F	CAHTSGWLDDYW	in-frame	272	0	0	272	0	0	0	0	0	0	0
IGHV1-18	F	x	x	IGHJ6	F	IGHG2	F	CARDYRLYVLDYYYGMDVW	in-frame	272	0	0	0	0	0	0	0	0	0	272
IGHV4-34	F	IGHD3-16	F	IGHJ2	F	IGHG1	F	CAGGPGRVVRDYFWGSSSRFDLW	in-frame	271	0	0	0	0	0	0	0	0	271	0
IGHV3-23D	F	x	x	IGHJ6	F	IGHG2	F	CAKGRGNGKTRYGVDVW	in-frame	271	271	0	0	0	0	0	0	0	0	0
IGHV3-11	F	IGHD5-24	ORF	IGHJ2	F	IGHG3	F	CARDFRRRDGYNFNWYLDLW	in-frame	271	0	0	0	271	0	0	0	0	0	0
IGHV4-61,IGHV4-59,IGHV4-38-2,IGHV4-30-2	F	IGHD3-9	F	IGHJ5	F	IGHG1	F	CAGGAYYDILTGYSLW	in-frame	269	0	0	269	0	0	0	0	0	0	0
IGHV4-4	F	x	x	IGHJ5	F	IGHG2	F	CAREVVRAYTWYGGLDPW	in-frame	267	0	0	0	0	0	0	0	0	267	0
IGHV4-4	F	IGHD6-13	F	IGHJ3	F	IGHG2	F	CARGETYSSSWHGDSDAFDIW	in-frame	267	0	0	267	0	0	0	0	0	0	0
IGHV4-34	F	IGHD6-19	F	IGHJ5	F	IGHG1	F	CARGPFQSRGWYRAGWFDPW	in-frame	267	0	0	0	0	0	0	267	0	0	0
IGHV3-72	F	x	x	IGHJ3	F	IGHG2	F	CADVGVAYGLDVW	in-frame	267	267	0	0	0	0	0	0	0	0	0
IGHV3-53	F	x	x	IGHJ1,IGHJ4	F	IGHG2	F	CARDSHSARRSSHW	in-frame	267	0	0	0	0	0	0	0	0	267	0
IGHV3-23	F	x	x	IGHJ4	F	IGHG1	F	CAKMEGVLVYW	in-frame	267	0	0	267	0	0	0	0	0	0	0
IGHV1-18	F	x	x	IGHJ4	F	IGHG1	F	CARGSYMTVSADRDAYW	in-frame	267	0	0	0	0	0	0	0	0	267	0
IGHV1-18	F	IGHD3-22	F	IGHJ6	F	IGHG2	F	CARGTDYYDRSNSRWVYFYMDVW	in-frame	267	0	0	0	0	0	0	0	267	0	0
IGHV3-15	F	IGHD2-15	F	IGHJ5	F	IGHG1	F	CSTDRYCSGGSCYWIDHW	in-frame	266	0	0	0	0	0	266	0	0	0	0
IGHV1-18	F	x	x	IGHJ3	F	IGHG2	F	CARDPLYTRTFFRAGPAFDIW	in-frame	266	0	0	0	0	0	0	0	0	0	266
IGHV1-18	F	IGHD3-22	F	IGHJ6	F	IGHG1	F	CARDDRGGYYDSSGKHYRRSHYYGMDVW	in-frame	266	0	0	266	0	0	0	0	0	0	0
IGHV4-34	F	x	x	IGHJ4	F	IGHG1	F	CAKTLVAGLVFDFW	in-frame	265	0	0	0	0	0	0	0	0	265	0
IGHV3-72	F	x	x	IGHJ5	F	IGHG1	F	CTRGREADSW	in-frame	265	0	265	0	0	0	0	0	0	0	0
IGHV3-7	F	x	x	IGHJ5	F	IGHG1	F	CAKVTRGWFDPW	in-frame	265	0	0	0	0	0	0	0	0	265	0
IGHV3-23D	F	x	x	IGHJ4	F	IGHG2	F	CAKGLRATGSYRWREIDSW	in-frame	265	0	265	0	0	0	0	0	0	0	0
IGHV1-46	F	x	x	IGHJ4	F	IGHG2	F	CARALGYCSTTDCYFDYW	in-frame	265	0	0	0	0	0	0	0	0	265	0
IGHV3-7,IGHV3-69-1,IGHV3-48	F	IGHD6-13	F	IGHJ5	F	IGHG4	F	CARQTLRAAGTGRYLW	in-frame	264	0	0	0	264	0	0	0	0	0	0
IGHV3-15	F	x	x	IGHJ6	F	IGHG1	F	CTTVGYCDSARWSGPGSCSYYYYYMDVW	in-frame	264	0	0	0	0	0	0	264	0	0	0
IGHV1-18	F	IGHD3-22	F	IGHJ4	F	IGHG1	F	CARDQGNYYDGSAYKYHGPIRFDSW	in-frame	264	0	0	0	0	0	0	264	0	0	0
IGHV7-4-1	F	IGHD3-10	F	IGHJ4	F	IGHG2	F	CARGGDGPGSWRGNYDSW	in-frame	263	0	0	263	0	0	0	0	0	0	0
IGHV3-72	F	x	x	IGHJ3	F	IGHG2	F	CARDLIGGYSFDMW	in-frame	263	0	0	0	0	0	0	0	0	0	263
IGHV3-20	ORF	x	x	IGHJ4	F	IGHG2	F	CVKVTLSRVYSSPFDSW	in-frame	263	0	0	0	0	0	0	0	0	263	0
IGHV3-15	F	IGHD3-9	F	IGHJ4	F	IGHG2	F	CTTARYFDWSISPYYFDYW	in-frame	263	0	0	263	0	0	0	0	0	0	0
IGHV4-61	F	IGHD1-26	F	IGHJ5	F	IGHG2	F	CARDSGSYSAWIDPW	in-frame	262	0	0	0	0	0	0	0	0	262	0
IGHV4-59,IGHV4-39	F	x	x	IGHJ4	F	IGHG2	F	CAASPSFVNSDRHRSPLDHW	in-frame	262	0	0	0	262	0	0	0	0	0	0
IGHV4-34	F	x	x	IGHJ6	F	IGHG3	F	CARLQRASPRGAFRRRFYDYYMDVW	in-frame	262	0	262	0	0	0	0	0	0	0	0
IGHV3-23D	F	IGHD3-10	F	IGHJ4	F	IGHG2	F	CAKVKYFGSGNYYRSLDYW	in-frame	262	0	0	0	0	0	262	0	0	0	0
IGHV1-18	F	IGHD1-26	F	IGHJ3	F	IGHG2	F	CARVVVGATFNALDIW	in-frame	262	0	0	262	0	0	0	0	0	0	0
IGHV4-30-4	F	x	x	IGHJ5	F	IGHG2	F	CTRDTSRAPGTTTWFDSW	in-frame	261	261	0	0	0	0	0	0	0	0	0
IGHV3-9	F	x	x	IGHJ6	F	IGHG2	F	CGKDGSPGGMDVW	in-frame	261	261	0	0	0	0	0	0	0	0	0
IGHV3-11	F	x	x	IGHJ4	F	IGHG2	F	CARLGYGDPKDYW	in-frame	261	0	0	0	261	0	0	0	0	0	0
IGHV2-5	F	x	x	IGHJ4	F	IGHG2	F	CARRLGSSIGGYRIFDYW	in-frame	261	261	0	0	0	0	0	0	0	0	0
IGHV1-3	F	x	x	IGHJ6	F	IGHG1	F	CARTWGMDVW	in-frame	261	0	0	0	0	0	0	0	0	261	0
IGHV1-18	F	IGHD2-15	F	IGHJ4	F	IGHG1	F	CARSASGGICDKCFDNW	in-frame	261	261	0	0	0	0	0	0	0	0	0
IGHV1-18	F	IGHD5-12	F	IGHJ4	F	IGHG3	F	CARDSNVDWLRLSPHDYW	in-frame	260	260	0	0	0	0	0	0	0	0	0
IGHV5-51	F	x	x	IGHJ3	F	IGHG1	F	CARGGSYGEDAFDIW	in-frame	259	0	0	259	0	0	0	0	0	0	0
IGHV4-39	F	x	x	IGHJ4	F	IGHG1	F	CASHGGSFPAGYLDYW	in-frame	259	0	0	0	0	0	0	259	0	0	0
IGHV3-15	F	x	x	IGHJ3	F	IGHG2	F	CTTGLRLWAFDTW	in-frame	259	0	0	259	0	0	0	0	0	0	0
IGHV1-3	F	IGHD3-10	F	IGHJ5	F	IGHG2	F	CAREGGFYYGSESSGWFDPW	in-frame	259	0	0	0	0	0	0	0	259	0	0
IGHV4-61	F	IGHD2-15	F	IGHJ4	F	IGHG2	F	CARAGYCSGGSCYRGAVEYW	in-frame	258	257	0	0	0	0	0	0	1	0	0
IGHV1-8	F	x	x	IGHJ4	F	IGHG2	F	CAAGHDQALAYW	in-frame	258	0	0	0	0	0	0	0	258	0	0
IGHV5-51	F	x	x	IGHJ3	F	IGHG2	F	CARTTYNYGPDEDEPGAFDIW	in-frame	257	0	0	0	0	0	0	0	0	257	0
IGHV4-39	F	IGHD3-22	F	IGHJ6	F	IGHG4	F	CASHYYDSNGWWDDMDVW	in-frame	257	0	0	0	0	0	0	0	257	0	0
IGHV4-30-4	F	x	x	IGHJ4	F	IGHG2	F	CARGRLDNYDCDYW	in-frame	257	0	0	0	0	0	0	0	257	0	0
IGHV3-9	F	IGHD6-19	F	IGHJ4	F	IGHG1	F	CAKGDIAVAGQSHLHYW	in-frame	257	0	0	0	0	257	0	0	0	0	0
IGHV3-53	F	x	x	IGHJ4	F	IGHG2	F	CARSLKWLLLLNSW	in-frame	257	0	0	0	0	0	0	0	0	257	0
IGHV3-23D	F	x	x	IGHJ4	F	IGHG2	F	CAKGAPLNSGYPTEKFDYW	in-frame	257	0	257	0	0	0	0	0	0	0	0
IGHV1-18	F	x	x	IGHJ6	F	IGHG2	F	CARGKPGDHILMDVW	in-frame	257	0	0	257	0	0	0	0	0	0	0
IGHV1-18	F	x	x	IGHJ5	F	IGHG2	F	CGRCHGGESPHWVGPW	in-frame	257	0	0	0	0	0	0	0	0	257	0
IGHV3-74	F	x	x	IGHJ3	F	IGHG1	F	CARDPATTVTWVVSLTPSDAFDIW	in-frame	256	0	0	0	0	0	0	0	0	256	0
IGHV5-51	F	IGHD2-21	F	IGHJ3	F	IGHG1	F	CARHERHCDDDCYCEGFDIW	in-frame	255	0	0	0	0	0	0	0	0	255	0
IGHV4-34	F	x	x	IGHJ6	F	IGHG2	F	CARGKEDFYDSGVSYRVGFYYMDVW	in-frame	255	0	0	0	0	0	0	0	0	255	0
IGHV1-18	F	x	x	IGHJ4	F	IGHG2	F	CARGGSSPTPPNFDSW	in-frame	255	0	0	0	0	0	0	0	255	0	0
IGHV1-18	F	IGHD3-22	F	IGHJ4	F	IGHG2	F	CARSPPHIPPYYYDSSGYYYADYW	in-frame	255	0	0	255	0	0	0	0	0	0	0
IGHV4-61	F	x	x	IGHJ6	F	IGHG2	F	CARDRRSFYGIDVW	in-frame	254	0	0	0	0	0	0	0	254	0	0
IGHV3-74	F	IGHD3-3	F	IGHJ4	F	IGHG2	F	CVGGYDFWALSYW	in-frame	254	0	0	0	0	0	254	0	0	0	0
IGHV3-72	F	x	x	IGHJ3	F	IGHG2	F	CATSTRLAGAEPMADRAFDMW	in-frame	254	0	0	0	0	0	0	0	0	254	0
IGHV3-49	F	IGHD6-19	F	IGHJ5,IGHJ4	F	IGHG2	F	CTRDPSAGIAVAQV*W	out-of-frame	254	0	0	0	0	0	0	0	254	0	0
IGHV7-4-1	F	IGHD6-19	F	IGHJ4	F	IGHG2	F	CARIPGQWLVPKAIDYW	in-frame	253	253	0	0	0	0	0	0	0	0	0
IGHV4-61	F	IGHD3-10	F	IGHJ3	F	IGHG2	F	CARDRGYYGSGRGAFDIW	in-frame	253	0	0	0	0	0	253	0	0	0	0
IGHV4-34,IGHV4-31	F	x	x	IGHJ4	F	IGHG2	F	CARGVEGLWGFDYW	in-frame	253	0	0	0	0	0	0	0	0	253	0
IGHV3-74	F	IGHD6-19	F	IGHJ4	F	IGHG2	F	CIAYNSGWNW	in-frame	253	0	0	0	0	0	0	0	253	0	0
IGHV3-30	F	IGHD4-17	F	IGHJ4	F	IGHG2	F	CARDDLEDYGDLPDYW	in-frame	253	253	0	0	0	0	0	0	0	0	0
IGHV4-39,IGHV4-34	F	IGHD3-22	F	IGHJ4	F	IGHG2	F	CARHAGPSDYYDSSGYYYYFDYW	in-frame	252	0	0	0	0	0	252	0	0	0	0
IGHV3-7	F	IGHD3-3	F	IGHJ6	F	IGHG1	F	CATLGFLEWSPLFDVW	in-frame	252	0	0	0	0	0	0	0	0	252	0
IGHV3-69-1,IGHV3-48	P	x	x	IGHJ4	F	IGHG2	F	CVRDSRWAFDYW	in-frame	252	0	0	0	0	252	0	0	0	0	0
IGHV3-48	F	IGHD5-12	F	IGHJ6	F	IGHG2	F	CARDLGVATIHWGYYYYGMDVW	in-frame	252	0	0	0	0	0	252	0	0	0	0
IGHV3-15	F	x	x	IGHJ4	F	IGHG1	F	CTTGRNWNRFDYW	in-frame	252	0	0	0	0	0	0	0	0	252	0
IGHV5-51	F	IGHD5-24,IGHD5-12	ORF	IGHJ4	F	IGHG1	F	CAKMGYDGYDYKPFDYW	in-frame	251	0	0	251	0	0	0	0	0	0	0
IGHV3-73	F	IGHD2/OR15-2b,IGHD2-2	ORF	IGHJ4	F	IGHG2	F	CTRHGWGDCSSTSCPLDYW	in-frame	251	0	0	0	0	0	251	0	0	0	0
IGHV3-33	F	x	x	IGHJ4	F	IGHG2	F	CAKEGDWNFSFDYW	in-frame	251	0	0	0	0	0	0	0	0	251	0
IGHV3-20	ORF	x	x	IGHJ5	F	IGHG1	F	CAREGFDIVTGLDGW	in-frame	251	251	0	0	0	0	0	0	0	0	0
IGHV5-51	F	x	x	IGHJ4	F	IGHG1	F	CTRSITAYKSSDFW	in-frame	250	250	0	0	0	0	0	0	0	0	0
IGHV5-51	F	IGHD3-22,IGHD4/OR15-4b,IGHD4/OR15-4a,IGHD2-15	F	IGHJ4	F	IGHG2	F	CARLGSFCSGANCRSPYYESRWGYFDYW	in-frame	250	250	0	0	0	0	0	0	0	0	0
IGHV4-59,IGHV4-4	F	x	x	IGHJ4	F	IGHG2	F	CAKIQPPYGGKAYW	in-frame	250	0	0	0	250	0	0	0	0	0	0
IGHV4-30-4,IGHV4-30-2	F	x	x	IGHJ5	F	IGHG2	F	CARIPIVAGVFGWFDPW	in-frame	250	0	0	0	0	0	0	0	250	0	0
IGHV3-9	F	x	x	IGHJ4	F	IGHG1	F	CARRGMGAWGPFDYW	in-frame	250	250	0	0	0	0	0	0	0	0	0
IGHV3-7	F	x	x	IGHJ4	F	IGHG2	F	CARYAALDCW	in-frame	250	0	0	0	0	0	0	0	0	250	0
IGHV1-18	F	x	x	IGHJ4	F	IGHG1	F	CARNYSNSRSIFSGFDYW	in-frame	250	0	0	0	0	250	0	0	0	0	0
IGHV1-18	F	IGHD4-23	ORF	IGHJ4	F	IGHG2	F	CARDLRSYDYGGDGYFDYW	in-frame	250	0	0	0	0	250	0	0	0	0	0
IGHV1-3	F	x	x	IGHJ3	F	IGHG2	F	CTRDFRNTESDAFDIW	in-frame	249	0	0	0	0	0	0	0	249	0	0
IGHV3-9	F	x	x	IGHJ6	F	IGHG2	F	CGKDITPGGMDVW	in-frame	247	0	0	0	0	0	247	0	0	0	0
IGHV3-48	F	x	x	IGHJ5	F	IGHG2	F	CARARSSDLW	in-frame	247	247	0	0	0	0	0	0	0	0	0
IGHV3-33	F	IGHD3-10	F	IGHJ4	F	IGHG2	F	CARSDMVRGIGLDYW	in-frame	247	247	0	0	0	0	0	0	0	0	0
IGHV3-30-3,IGHV3-30	F	x	x	IGHJ4	F	IGHG2	F	CARDHDSAEDFW	in-frame	247	0	0	0	0	0	0	0	0	247	0
IGHV3-23D	F	x	x	IGHJ4	F	IGHG2	F	CAKTLYGGCDYW	in-frame	247	0	0	0	0	0	0	0	0	247	0
IGHV3-74	F	IGHD5-24	ORF	IGHJ4	F	IGHG1	F	CASASEMATPGDYW	in-frame	246	0	0	246	0	0	0	0	0	0	0
IGHV3-74	F	IGHD4-17	F	IGHJ4	F	IGHG2	F	CARGSTVTTTPLDFW	in-frame	246	0	0	0	0	0	246	0	0	0	0
IGHV3-74	F	IGHD3-9	F	IGHJ4,IGHJ1	F	IGHG2	F	CTRDFDWENGHW	in-frame	246	0	0	0	246	0	0	0	0	0	0
IGHV3-20	ORF	x	x	IGHJ4	F	IGHG1	F	CAREAATVTGGGYYFDSW	in-frame	246	0	0	246	0	0	0	0	0	0	0
IGHV3-15	F	IGHD2-2	F	IGHJ6	F	IGHG1	F	CTTVGYCDSASWSGPGSCSFYYYYMDVW	in-frame	246	0	0	0	0	0	0	246	0	0	0
IGHV1-69D	F	x	x	IGHJ1	F	IGHG1	F	CARMAGNIVVVPAVAFFQHW	in-frame	246	0	0	0	0	0	0	0	0	246	0
IGHV1-18	F	IGHD3-10	F	IGHJ6	F	IGHG1	F	CARDDARFYGSGNSNNFYYGMDVW	in-frame	246	0	0	246	0	0	0	0	0	0	0
IGHV5-51	F	x	x	IGHJ6	F	IGHG2	F	CATRVSRASFYFHYMDVW	in-frame	245	0	0	0	0	0	0	0	0	245	0
IGHV4/OR15-8	ORF	x	x	IGHJ4	F	IGHG1	F	CARTPVAAAAFDYW	in-frame	245	0	0	0	0	0	245	0	0	0	0
IGHV3-7	F	x	x	IGHJ6	F	IGHG1	F	CARARIYFHMDVW	in-frame	245	0	0	0	0	0	245	0	0	0	0
IGHV3-66	F	IGHD5-5,IGHD5-18	F	IGHJ3	F	IGHG2	F	CARHVDTAMVTAFDIW	in-frame	245	0	0	245	0	0	0	0	0	0	0
IGHV1-3	F	IGHD4-17	F	IGHJ6	F	IGHG2	F	CARGRGNDFGDYRYYYYMDVW	in-frame	245	0	0	0	0	0	0	0	245	0	0
IGHV3-23D	F	x	x	IGHJ4	F	IGHG2	F	CAKAEGMLLEKWYFDYW	in-frame	244	244	0	0	0	0	0	0	0	0	0
IGHV2-5	F	x	x	IGHJ4	F	IGHG2	F	CAHLSGWLADYW	in-frame	244	0	0	244	0	0	0	0	0	0	0
IGHV4-59,IGHV4-4	F	x	x	IGHJ3	F	IGHG2	F	CVIWAPEVRAFNIW	in-frame	243	0	0	0	0	0	0	0	0	243	0
IGHV3-73	F	x	x	IGHJ4	F	IGHG1	F	CSSYDNDGNYYLNYW	in-frame	243	0	0	243	0	0	0	0	0	0	0
IGHV3-48	F	x	x	IGHJ4	F	IGHG2	F	CTTDFDYW	in-frame	243	0	0	0	0	0	0	0	0	243	0
IGHV3-11	F	IGHD3-10	F	IGHJ4	F	IGHG2	F	CARESPRDYGSGADFDYW	in-frame	243	0	0	0	0	0	0	0	0	243	0
IGHV1-69	F	x	x	IGHJ6	F	IGHG1	F	CAGLPETTTYYYYGLDVW	in-frame	243	0	0	0	243	0	0	0	0	0	0
IGHV4-61,IGHV4-59	F	x	x	IGHJ5	F	IGHG1	F	CARSSEVLAANSNWFDPW	in-frame	242	0	0	242	0	0	0	0	0	0	0
IGHV4-34,IGHV4-31	F	IGHD3-3	F	IGHJ6	F	IGHG1	F	CATYRFLEWESSTYLDVW	in-frame	242	0	0	0	0	0	0	242	0	0	0
IGHV3-53	F	x	x	IGHJ4	F	IGHG1	F	CQYRDWGRANYFDYW	in-frame	242	0	0	0	0	0	0	0	0	242	0
IGHV3-48	F	x	x	IGHJ6	F	IGHG1	F	CARDWWAGTTYYYGMDVW	in-frame	242	0	0	0	0	0	0	0	0	242	0
IGHV1-8	F	x	x	IGHJ5	F	IGHG2	F	CARGSGQLGRDWFDPW	in-frame	242	0	0	0	0	0	0	0	242	0	0
IGHV4-4	F	x	x	IGHJ4	F	IGHG2	F	CARDMGNYVDYW	in-frame	241	0	0	0	0	241	0	0	0	0	0
IGHV3-66,IGHV3-30	F	x	x	IGHJ5	F	IGHG2	F	CAKGDCQRSCYLPNFDPW	in-frame	241	0	0	0	0	0	0	0	0	241	0
IGHV2-5	F	x	x	IGHJ5	F	IGHG1	F	CAHKRHVGAIGTFGPW	in-frame	241	0	0	0	0	0	0	241	0	0	0
IGHV1-8	F	x	x	IGHJ4	F	IGHG2	F	CARRPGESGGKDPLLDW	in-frame	241	0	0	0	0	0	0	0	0	241	0
IGHV1-18	F	x	x	IGHJ4	F	IGHG2	F	CARDTADDYDFDFW	in-frame	241	0	0	0	0	0	241	0	0	0	0
IGHV7-4-1	F	x	x	IGHJ6	F	IGHG1	F	CARLGGLGASMDVW	in-frame	240	0	0	0	0	0	0	240	0	0	0
IGHV3-23D	F	x	x	IGHJ3	F	IGHG2	F	CARDLVTQSLDAFDLW	in-frame	240	0	0	0	0	0	0	0	0	240	0
IGHV1-18	F	x	x	IGHJ6	F	IGHG1	F	CSRDPFLVVVPAQYTNTWVGLELW	in-frame	240	240	0	0	0	0	0	0	0	0	0
IGHV4-61,IGHV4-59	F	IGHD4-17	F	IGHJ6	F	IGHG2	F	CARVAYGDYGHYYYYYYMDVW	in-frame	239	0	0	0	0	0	239	0	0	0	0
IGHV3-NL1,IGHV3-30-5,IGHV3-30-3,IGHV3-30	F	x	x	IGHJ3	F	IGHG1	F	CAKAMGVAHAFDMW	in-frame	239	0	0	0	0	0	239	0	0	0	0
IGHV3-23D	F	IGHD3-10	F	IGHJ5	F	IGHG1	F	CAKARVRGVKGSSWFDPW	in-frame	239	0	0	0	0	0	0	0	0	239	0
IGHV1-2	F	IGHD1-26	F	IGHJ1	F	IGHG2	F	CARESSGSYGIRFFQDW	in-frame	239	0	0	0	0	0	0	0	0	0	239
IGHV4-59	F	x	x	IGHJ4	F	IGHG1	F	CARHRKYYDGLFDYW	in-frame	238	0	0	238	0	0	0	0	0	0	0
IGHV2-70D,IGHV2-70	F	x	x	IGHJ3	F	IGHG1	F	CARTLARPVGGWKRDDAFDIW	in-frame	238	0	0	238	0	0	0	0	0	0	0
IGHV4-61	F	x	x	IGHJ6	F	IGHG1	F	CARDNWDLHDGMDVW	in-frame	237	0	0	0	0	0	237	0	0	0	0
IGHV3-74	F	x	x	IGHJ1	F	IGHG2	F	CARDTGGLPFW	in-frame	237	237	0	0	0	0	0	0	0	0	0
IGHV3-72	F	x	x	IGHJ4	F	IGHG1	F	CASGLSGYYSGGYYW	in-frame	237	0	0	0	0	0	0	0	0	0	237
IGHV3-66	F	IGHD6-13	F	IGHJ4	F	IGHG2	F	CARGVAAAGTFDYW	in-frame	237	0	0	237	0	0	0	0	0	0	0
IGHV3-15	F	x	x	IGHJ4	F	IGHG1	F	CTTDPVEYDTTWPYVDFW	in-frame	237	237	0	0	0	0	0	0	0	0	0
IGHV4-61	F	x	x	IGHJ6	F	IGHG2	F	CAHYEYTSGTHVW	in-frame	236	0	0	0	0	0	0	0	0	236	0
IGHV4-34	F	x	x	IGHJ5	F	IGHG2	F	CAREVVRAYTWYGGLDPW	in-frame	236	0	0	0	0	0	0	0	0	236	0
IGHV4-30-4	F	x	x	IGHJ1	F	IGHG3	F	CARADGYTGVGAFVRYFEPW	in-frame	236	0	0	0	0	0	0	236	0	0	0
IGHV3-7,IGHV3-69-1,IGHV3-48,IGHV3-21	F	x	x	IGHJ4	F	IGHG1	F	CARESIQLWIRSFDYW	in-frame	236	0	0	236	0	0	0	0	0	0	0
IGHV3-23D	F	x	x	IGHJ5	F	IGHG2	F	CVKDFRANDGKNRLDPW	in-frame	236	0	0	0	0	236	0	0	0	0	0
IGHV3-23D	F	IGHD2-15	F	IGHJ4	F	IGHG1	F	CANNIGYCRGGSCYLFDYW	in-frame	236	0	1	235	0	0	0	0	0	0	0
IGHV1-46	F	x	x	IGHJ3	F	IGHG1	F	CSASSPGNYNDAFDIW	in-frame	236	0	0	236	0	0	0	0	0	0	0
IGHV1-18	F	x	x	IGHJ6	F	IGHG2	F	CARHYNAWSLDVW	in-frame	236	0	0	0	0	0	0	0	236	0	0
IGHV4-61	F	x	x	IGHJ6	F	IGHG4	F	CARDLGGRLTGWKAYGMDVW	in-frame	235	0	0	0	0	0	0	0	0	235	0
IGHV4-61	F	IGHD3-9	F	IGHJ5	F	IGHG1	F	CASTVLRYFDWEKGGWFDPW	in-frame	235	0	0	0	0	0	235	0	0	0	0
IGHV3-NL1,IGHV3-30-5,IGHV3-30-3,IGHV3-30	F	x	x	IGHJ3	F	IGHG1	F	CANEAGSATVSTFQMW	in-frame	235	0	235	0	0	0	0	0	0	0	0
IGHV3-9	F	x	x	IGHJ4	F	IGHG1	F	CAKETSGWYFDY*W	out-of-frame	235	0	0	0	0	0	0	0	235	0	0
IGHV3-73	F	x	x	IGHJ3	F	IGHG2	F	CSRWVIATNEAFDIW	in-frame	235	0	0	0	0	0	0	0	0	235	0
IGHV1-18	F	IGHD3-10	F	IGHJ6	F	IGHG1	F	CARRDYYYGSGREYYYYYGMDVW	in-frame	235	0	0	235	0	0	0	0	0	0	0
IGHV5-51	F	x	x	IGHJ4	F	IGHG1	F	CARLDTGYDWGIDYW	in-frame	234	0	0	0	0	0	0	0	0	234	0
IGHV4-61,IGHV4-59	F	IGHD3-10	F	IGHJ4	F	IGHG2	F	CARDPDTSGSWEKGFDYW	in-frame	234	0	0	0	0	0	234	0	0	0	0
IGHV3-7	F	x	x	IGHJ6	F	IGHG2	F	CARHSNDYYYAMDVW	in-frame	234	0	0	0	0	0	0	0	0	0	234
IGHV3-48	F	IGHD3-3	F	IGHJ5,IGHJ4	F	IGHG3	F	CARDDYDFWSGHYLFW	in-frame	234	0	0	0	0	0	0	0	0	234	0
IGHV3-15	F	x	x	IGHJ4	F	IGHG1	F	CTTDPLWSRPGDDFDYW	in-frame	234	234	0	0	0	0	0	0	0	0	0
IGHV2-70,IGHV2-5	F	IGHD3-9	F	IGHJ5	F	IGHG2	F	CAHRRGSRYYDILTGYYGSWFDPW	in-frame	234	0	0	234	0	0	0	0	0	0	0
IGHV2-5	F	x	x	IGHJ2	F	IGHG1	F	CAHTAGRLGVAGRYWHFDLW	in-frame	234	0	0	0	0	0	234	0	0	0	0
IGHV7-4-1	F	x	x	IGHJ5	F	IGHG1	F	CARGVSDGSRTWWFDPW	in-frame	233	0	0	0	0	0	233	0	0	0	0
IGHV5-51	F	x	x	IGHJ4	F	IGHG2	F	CARGYQTTGSFKADYW	in-frame	233	0	0	0	0	0	0	0	233	0	0
IGHV4-59	F	x	x	IGHJ4	F	IGHG1	F	CARGKTTSYFDYW	in-frame	233	0	0	0	0	0	0	0	0	233	0
IGHV4-34	F	IGHD3-10	F	IGHJ1	F	IGHG3	F	CASITLVRGAEWGFW	in-frame	233	0	0	0	0	0	0	0	0	233	0
IGHV3-7	F	x	x	IGHJ4	F	IGHG2	F	CARTARRLDYW	in-frame	233	0	0	0	0	0	0	0	0	233	0
IGHV3-69-1,IGHV3-48	P	x	x	IGHJ5	F	IGHG2	F	CARDVEDTSLDNFFAPW	in-frame	233	0	0	0	0	0	0	0	0	233	0
IGHV4-34	F	x	x	IGHJ4	F	IGHG1	F	CVKGLGTSDDYW	in-frame	232	0	231	0	0	1	0	0	0	0	0
IGHV3-23D	F	x	x	IGHJ6	F	IGHG1	F	CAKYTDTWDHFGLDVW	in-frame	232	232	0	0	0	0	0	0	0	0	0
IGHV3-15	F	x	x	IGHJ4	F	IGHG2	F	CGEHHYASGRDYW	in-frame	232	0	0	0	0	0	232	0	0	0	0
IGHV1-69D,IGHV1-69	F	IGHD3-9	F	IGHJ6	F	IGHG2	F	CARDRPGAYYDILTGYSDHYYYYGMDVW	in-frame	232	0	0	0	0	0	232	0	0	0	0
IGHV1-18	F	x	x	IGHJ4	F	IGHG2	F	CAKHGNSWSLDYW	in-frame	232	0	0	0	0	0	0	0	232	0	0
IGHV1-18	F	x	x	IGHJ4	F	IGHG1	F	CARDLKFDSGSPPAFW	in-frame	232	0	0	0	0	0	232	0	0	0	0
IGHV4-59,IGHV4-34,IGHV4-31	F	x	x	IGHJ3	F	IGHG1	F	CARKGSDHGGFDIW	in-frame	231	0	0	0	0	0	0	0	0	231	0
IGHV4-59	F	IGHD3-22	F	IGHJ5	F	IGHG2	F	CAGGGDYYDSLLW	in-frame	231	0	0	0	0	0	0	0	231	0	0
IGHV4-34	F	x	x	IGHJ3	F	IGHG2	F	CARAKGIAATYTFDIW	in-frame	231	0	0	0	0	0	0	0	0	231	0
IGHV3-48	F	x	x	IGHJ6	F	IGHG1	F	CARDGPVATVRGLVTEEQPPGYMDVW	in-frame	231	0	0	0	0	0	0	0	0	231	0
IGHV3-23D	F	IGHD5-5,IGHD5-18	F	IGHJ4	F	IGHG1	F	CTKEASGYSYAESW	in-frame	231	0	0	0	0	0	0	0	0	231	0
IGHV1-46	F	x	x	IGHJ4	F	IGHG1	F	CARGWSYFDYW	in-frame	231	231	0	0	0	0	0	0	0	0	0
IGHV1-18	F	x	x	IGHJ4	F	IGHG2	F	CARQQAAGSPDTYYFDYW	in-frame	231	0	0	231	0	0	0	0	0	0	0
IGHV4-61	F	x	x	IGHJ5	F	IGHG1	F	CARIRVRGWFDPW	in-frame	230	0	0	0	0	0	230	0	0	0	0
IGHV4-61	F	x	x	IGHJ4	F	IGHG1	F	CARERRMHEFGDYRGYRFFDLW	in-frame	230	0	0	0	0	0	230	0	0	0	0
IGHV3-23D	F	x	x	IGHJ4	F	IGHG2	F	CVKDYTVRPRGTTFFADW	in-frame	230	230	0	0	0	0	0	0	0	0	0
IGHV3-13	F	x	x	IGHJ3	F	IGHG1	F	CARVGYKADAFDIW	in-frame	230	230	0	0	0	0	0	0	0	0	0
IGHV1-3	F	x	x	IGHJ6	F	IGHG1	F	CARGRRQLFYMDVW	in-frame	230	0	0	0	0	0	0	0	0	230	0
IGHV1-18	F	x	x	IGHJ3	F	IGHG2	F	CARDPLYSRTWFRAGPAFDIW	in-frame	230	0	0	0	0	0	0	0	0	0	230
IGHV1-18	F	IGHD3-22	F	IGHJ4	F	IGHG1	F	CASTPYYYESTGYYYDFW	in-frame	230	0	0	230	0	0	0	0	0	0	0
IGHV3-9	F	x	x	IGHJ6	F	IGHG2	F	CVEDVVPGGAGVW	in-frame	229	0	0	0	0	0	0	0	0	229	0
IGHV3-9	F	x	x	IGHJ5	F	IGHG2	F	CTKLDVTGWRGGFASW	in-frame	229	229	0	0	0	0	0	0	0	0	0
IGHV3-74	F	x	x	IGHJ4	F	IGHG2	F	CVRDGHVSRVDFW	in-frame	229	0	0	0	229	0	0	0	0	0	0
IGHV1-3	F	x	x	IGHJ6	F	IGHG2	F	CARGVHYAMDVW	in-frame	229	0	0	0	0	0	0	0	229	0	0
IGHV4-61,IGHV4-38-2,IGHV4-30-2	F	x	x	IGHJ5,IGHJ4	F	IGHG2	F	CARDPGGYNKDQGDSW	in-frame	228	0	0	0	0	0	0	0	0	228	0
IGHV4-34	F	x	x	IGHJ3	F	IGHG1	F	CARVSGYSSIDIW	in-frame	228	0	0	0	0	0	228	0	0	0	0
IGHV3-9	F	x	x	IGHJ6	F	IGHG2	F	CAKGKSNSHYYGMDVW	in-frame	228	0	0	0	0	0	0	0	0	228	0
IGHV3-74	F	x	x	IGHJ4	F	IGHG2	F	CVRDSSLTYW	in-frame	228	0	0	0	0	0	0	0	228	0	0
IGHV4-4	F	x	x	IGHJ6	F	IGHG1	F	CARGITFYGVDVW	in-frame	227	0	0	227	0	0	0	0	0	0	0
IGHV3-9	F	x	x	IGHJ4	F	IGHG2	F	CAKVLFGTTCCGGYFDLW	in-frame	227	0	0	227	0	0	0	0	0	0	0
IGHV3-23D	F	x	x	IGHJ4	F	IGHG1	F	CAKVKWEKPYFDQW	in-frame	227	0	0	227	0	0	0	0	0	0	0
IGHV4-4	F	x	x	IGHJ5	F	IGHG2	F	CARDGRGWRNWFDPW	in-frame	226	0	0	0	0	0	0	0	0	0	226
IGHV3-7,IGHV3-69-1,IGHV3-48,IGHV3-21	F	IGHD6-19	F	IGHJ1	F	IGHG1	F	CARYSSGWYDEYFQHW	in-frame	226	0	0	0	0	0	226	0	0	0	0
IGHV2-5	F	IGHD5-12	F	IGHJ4	F	IGHG1	F	CAHTSLWLRFFDYW	in-frame	226	0	0	226	0	0	0	0	0	0	0
IGHV1-18	F	x	x	IGHJ4	F	IGHG2	F	CARVRAAPGVYYFDYW	in-frame	226	0	0	0	0	0	0	0	0	226	0
IGHV3-7,IGHV3-69-1,IGHV3-48,IGHV3-21	F	IGHD6-13	F	IGHJ6	F	IGHG2	F	CARDGPAAGTIGFYYYYMGVW	in-frame	225	0	0	0	0	0	0	0	0	225	0
IGHV3-23D	F	x	x	IGHJ4	F	IGHG2	F	CAKAPRAGVFGGFEYW	in-frame	225	0	225	0	0	0	0	0	0	0	0
IGHV3-23D	F	IGHD3-10	F	IGHJ4	F	IGHG1	F	CAKDRSRSGSGSYYTDFDFW	in-frame	225	0	0	0	225	0	0	0	0	0	0
IGHV3-11	F	x	x	IGHJ4	F	IGHG2	F	CARGNYGEDYW	in-frame	225	0	0	0	225	0	0	0	0	0	0
IGHV2-5	F	x	x	IGHJ4	F	IGHG1	F	CARIGGWTPIFDSW	in-frame	225	0	0	0	0	225	0	0	0	0	0
IGHV1-3	F	x	x	IGHJ4	F	IGHG4	F	CAKRGHTWGDFDYW	in-frame	225	0	0	0	0	0	0	0	0	0	225
IGHV4-39	F	x	x	IGHJ6	F	IGHG1	F	CARDRLGDYMDVW	in-frame	224	0	0	0	0	0	0	0	0	224	0
IGHV4-34	F	IGHD3/OR15-3b,IGHD3/OR15-3a	ORF	IGHJ4	F	IGHG3	F	CARGPRYRITSIRKGFLDNW	in-frame	224	0	0	0	0	0	0	0	224	0	0
IGHV3-13	F	x	x	IGHJ2	F	IGHG2	F	CVRGGVGLDWYFDLW	in-frame	224	0	0	223	0	0	0	0	0	1	0
IGHV1-58	F	IGHD3-10	F	IGHJ4	F	IGHG1	F	CAADRAPGIIIDGYW	in-frame	224	224	0	0	0	0	0	0	0	0	0
IGHV4-39	F	x	x	IGHJ5	F	IGHG3	F	CARMTGSFGAGCFDPW	in-frame	223	0	0	0	0	0	0	223	0	0	0
IGHV4-34	F	IGHD2-15	F	IGHJ6	F	IGHG2	F	CASHCSGANCYYGMHVW	in-frame	223	0	1	222	0	0	0	0	0	0	0
IGHV3-23D	F	x	x	IGHJ3	F	IGHG2	F	CAKDEGPMVGATTGAFDIW	in-frame	223	0	0	0	0	0	0	0	223	0	0
IGHV3-23D	F	x	x	IGHJ3	F	IGHG1	F	CAQLGSDAFDIW	in-frame	223	223	0	0	0	0	0	0	0	0	0
IGHV2-70D,IGHV2-70	F	x	x	IGHJ3	F	IGHG2	F	CARMVRGDLNAFDIW	in-frame	223	0	0	223	0	0	0	0	0	0	0
IGHV2-26	F	IGHD3-10	F	IGHJ3	F	IGHG1	F	CARGAEWFGESAFDIW	in-frame	223	0	0	223	0	0	0	0	0	0	0
IGHV1-18	F	x	x	IGHJ4	F	IGHG2	F	CVRDIDYAPDYW	in-frame	223	0	0	0	223	0	0	0	0	0	0
IGHV5-51	F	x	x	IGHJ6	F	IGHG1	F	CARHKGLRFTKYFYGLDLW	in-frame	222	0	0	0	0	0	0	0	222	0	0
IGHV4-61,IGHV4-59	F	IGHD6-13	F	IGHJ3	F	IGHG2	F	CARVGSSWPPDALDFW	in-frame	222	0	0	0	0	0	0	0	0	0	222
IGHV3-7	F	x	x	IGHJ6	F	IGHG2	F	CARLAGGDYFYGMDVW	in-frame	222	0	0	0	0	0	0	0	0	222	0
IGHV3-23D	F	x	x	IGHJ4	F	IGHG2	F	CVKRFPSAVTGSGSLDYW	in-frame	222	0	0	0	0	222	0	0	0	0	0
IGHV1-18	F	IGHD3-10	F	IGHJ4	F	IGHG2	F	CARISGFGELFPYFDYW	in-frame	222	0	0	222	0	0	0	0	0	0	0
IGHV6-1	F	x	x	IGHJ4	F	IGHG2	F	CARESGLMVTGTRRYFDYW	in-frame	221	221	0	0	0	0	0	0	0	0	0
IGHV4-59	F	x	x	IGHJ4	F	IGHG2	F	CARRSQSGWDTRGVLDSW	in-frame	221	0	0	221	0	0	0	0	0	0	0
IGHV4-30-2	F	x	x	IGHJ3	F	IGHG2	F	CARDAWHISEGQGTYDAFDFW	in-frame	221	0	0	0	0	0	0	0	0	0	221
IGHV3-72	F	IGHD6-13	F	IGHJ4	F	IGHG2	F	CARGRYSSSWSPPFDYW	in-frame	221	0	0	221	0	0	0	0	0	0	0
IGHV3-23D	F	IGHD6-13	F	IGHJ5	F	IGHG2	F	CAKYIAAAGNGFDPW	in-frame	221	0	0	0	0	0	221	0	0	0	0
IGHV4-39	F	x	x	IGHJ4	F	IGHG2	F	CGRRGDFLAGYWDYW	in-frame	220	0	0	0	0	0	0	0	0	220	0
IGHV3-15	F	x	x	IGHJ3	F	IGHG2	F	CTTGRACVSW	in-frame	220	0	0	0	0	0	0	0	0	220	0
IGHV3-15	F	IGHD2-2	F	IGHJ6	F	IGHG2	F	CVWIERYCTTTSCRGDDSYYYYMGVW	in-frame	220	0	0	0	0	0	0	220	0	0	0
IGHV1-8	F	x	x	IGHJ6	F	IGHG2	F	CARSGWLYYYYYYMDVW	in-frame	220	0	0	0	0	220	0	0	0	0	0
IGHV5-51	F	x	x	IGHJ3	F	IGHG2	F	CARQPAFEDPSNAFDIW	in-frame	219	0	0	0	219	0	0	0	0	0	0
IGHV4-59	F	IGHD3-22	F	IGHJ6	F	IGHG1	F	CARGRGRNSSGYYSSHYYYIDVW	in-frame	219	0	0	0	0	0	0	0	0	219	0
IGHV4-4,IGHV4-39,IGHV4-34	F	x	x	IGHJ4	F	IGHG2	F	CARGAGFRYYFDSGSYSGGLLDYW	in-frame	219	0	0	0	0	0	0	0	0	219	0
IGHV3-74	F	x	x	IGHJ6	F	IGHG2	F	CATHRGTLYYYDAMDVW	in-frame	219	0	0	0	219	0	0	0	0	0	0
IGHV3-48	F	IGHD6-13	F	IGHJ6	F	IGHG2	F	CARRQQLVPGTPNYYYYYGMDVW	in-frame	219	0	219	0	0	0	0	0	0	0	0
IGHV3-23D	F	x	x	IGHJ5	F	IGHG2	F	CARGHGSAW	in-frame	219	219	0	0	0	0	0	0	0	0	0
IGHV3-23D	F	x	x	IGHJ3	F	IGHG2	F	CAKCGSNWGNDAFDVW	in-frame	219	0	0	0	0	0	0	0	0	219	0
IGHV4-61	F	x	x	IGHJ3	F	IGHG2	F	CARVGTVVMGYVFDMW	in-frame	218	0	0	218	0	0	0	0	0	0	0
IGHV3-74	F	IGHD3-9	F	IGHJ4	F	IGHG2	F	CTRDFDWEDGYW	in-frame	218	0	0	0	218	0	0	0	0	0	0
IGHV3-43	F	x	x	IGHJ4	F	IGHG3	F	CVKEHYTGWPNFDSW	in-frame	218	0	0	0	0	0	0	0	0	218	0
IGHV2-5	F	IGHD6-13	F	IGHJ4	F	IGHG1	F	CAHRLGSSSWYVAFDYW	in-frame	218	0	0	218	0	0	0	0	0	0	0
IGHV1-24	F	IGHD3-3	F	IGHJ5	F	IGHG2	F	CATLRFLEWTQGDPW	in-frame	218	0	0	0	0	218	0	0	0	0	0
IGHV1-18	F	IGHD3-9	F	IGHJ6	F	IGHG2	F	CARDPYYDILIGYRRAGYLGMEDW	in-frame	218	0	0	0	0	0	0	0	0	0	218
IGHV5-51	F	x	x	IGHJ4	F	IGHG1	F	CARGIDRWQPYSFDYW	in-frame	217	0	0	0	217	0	0	0	0	0	0
IGHV3-23D	F	x	x	IGHJ6	F	IGHG2	F	CAKSPRTMDVW	in-frame	217	0	0	0	0	0	0	0	0	217	0
IGHV3-23D	F	x	x	IGHJ6	F	IGHG1	F	CAKEYDGTYYNYGMDVW	in-frame	217	0	0	0	0	0	0	217	0	0	0
IGHV3-15	F	x	x	IGHJ5,IGHJ4	F	IGHG2	F	CTTFEYSDPGW	in-frame	217	0	0	0	0	0	0	0	217	0	0
IGHV1-8	F	x	x	IGHJ4	F	IGHG2	F	CARGGGVDSW	in-frame	217	0	0	0	0	0	0	0	0	217	0
IGHV1-3	F	IGHD5-24	ORF	IGHJ4	F	IGHG2	F	CARDGYNWWPLDYW	in-frame	217	217	0	0	0	0	0	0	0	0	0
IGHV1-3	F	IGHD3-10	F	IGHJ5	F	IGHG1	F	CARDGDYGSGTTWDNWFDPW	in-frame	217	0	0	217	0	0	0	0	0	0	0
IGHV1-18	F	IGHD2-15	F	IGHJ3	F	IGHG2	F	CARCKYCSGWPWYGFDLW	in-frame	217	0	0	0	217	0	0	0	0	0	0
IGHV3-74	F	x	x	IGHJ5	F	IGHG1	F	CGRGGDGIDRW	in-frame	216	216	0	0	0	0	0	0	0	0	0
IGHV3-7	F	x	x	IGHJ1,IGHJ5	F	IGHG2	F	CTRGVSYYPSW	in-frame	216	216	0	0	0	0	0	0	0	0	0
IGHV2-5	F	x	x	IGHJ5	F	IGHG1	F	CVHRHDRGEDDWPHNWFDPW	in-frame	216	0	0	0	216	0	0	0	0	0	0
IGHV1-46	F	IGHD3-10	F	IGHJ6	F	IGHG1	F	CARDPMVRGGMGNYQYCYMDVW	in-frame	216	0	0	0	0	0	0	0	0	216	0
IGHV4-61	F	x	x	IGHJ4	F	IGHG1	F	CAISSPLGDFDSW	in-frame	215	0	0	215	0	0	0	0	0	0	0
IGHV4-39	F	IGHD6-13	F	IGHJ2	F	IGHG1	F	CARDSGYSSSWGYWYFDLW	in-frame	215	0	0	0	0	0	0	0	0	215	0
IGHV3-48	F	x	x	IGHJ5	F	IGHG2	F	CARRSPQYSFDTW	in-frame	215	0	0	0	0	0	0	0	0	0	215
IGHV3-33	F	x	x	IGHJ5	F	IGHG2	F	CARDYSAAGSVYNWFDPW	in-frame	215	0	0	0	215	0	0	0	0	0	0
IGHV4-59	F	x	x	IGHJ4	F	IGHG2	F	CARHGPSGNYKGYFDYW	in-frame	214	0	0	0	0	0	0	0	214	0	0
IGHV4-39	F	x	x	IGHJ4	F	IGHG2	F	CARHSGSFPAGHFDTW	in-frame	214	0	0	0	0	0	0	214	0	0	0
IGHV4-34	F	IGHD6-19	F	IGHJ1	F	IGHG3	F	CARGRYRSGWTRAEYFQHW	in-frame	214	214	0	0	0	0	0	0	0	0	0
IGHV3-23D	F	x	x	IGHJ4	F	IGHG2	F	CAKWDGTGIIDYW	in-frame	214	0	0	0	0	0	214	0	0	0	0
IGHV3-23D	F	x	x	IGHJ4	F	IGHG1	F	CAGGSDFWRLYFDSW	in-frame	214	0	0	0	0	214	0	0	0	0	0
IGHV3-23D	F	x	x	IGHJ3	F	IGHG1	F	CAKRPVVVWRNDAFDIW	in-frame	214	0	0	0	0	0	0	0	0	214	0
IGHV3-23D	F	x	x	IGHJ3	F	IGHG1	F	CAKGSDYYGDDAFDIW	in-frame	214	0	0	214	0	0	0	0	0	0	0
IGHV3-11	F	x	x	IGHJ3	F	IGHG2	F	CARIATGLADPGGFDIW	in-frame	214	0	0	0	0	0	0	0	0	214	0
IGHV2-5	F	IGHD1-26	F	IGHJ4	F	IGHG1	F	CAKSLRIVGASTYFDYW	in-frame	214	214	0	0	0	0	0	0	0	0	0
IGHV1-3	F	IGHD3-10	F	IGHJ4	F	IGHG1	F	CARPKYYYGSGSYLDYW	in-frame	214	214	0	0	0	0	0	0	0	0	0
IGHV7-4-1	F	IGHD6-19	F	IGHJ4	F	IGHG1	F	CARDGTAVAGNRYHLDYW	in-frame	213	0	0	0	0	0	0	0	213	0	0
IGHV4-61	F	IGHD3-10	F	IGHJ6	F	IGHG2	F	CAREVHASTYYYGSGSYYNHNYYYYYMDVW	in-frame	213	0	0	0	0	0	213	0	0	0	0
IGHV3-9	F	IGHD3-9	F	IGHJ4	F	IGHG1	F	CAKGDLRYFDWSNFDYW	in-frame	213	0	0	213	0	0	0	0	0	0	0
IGHV3-69-1,IGHV3-48	P	x	x	IGHJ6	F	IGHG1	F	CARESHGGYCSSNSCTEGSYYYGLDVW	in-frame	213	0	0	0	0	0	0	0	0	213	0
IGHV3-64,IGHV3-30-3,IGHV3-30	F	IGHD3-10	F	IGHJ5	F	IGHG2	F	CARDYYPGSGNNWASNWFDPW	in-frame	213	0	0	0	0	0	0	0	0	213	0
IGHV4-59,IGHV4-4	F	x	x	IGHJ3	F	IGHG2	F	CVRPQRGGAFDIW	in-frame	212	0	0	212	0	0	0	0	0	0	0
IGHV4-55	P	x	x	IGHJ4	F	IGHG2	F	CARGPQNAASFYGYW	in-frame	212	0	0	0	0	0	0	0	0	212	0
IGHV4-39	F	x	x	IGHJ5	F	IGHG1	F	CARQRYTGHDVWFDPW	in-frame	212	0	0	212	0	0	0	0	0	0	0
IGHV4-39	F	IGHD5-24	ORF	IGHJ4	F	IGHG1	F	CARHSPNTRDGYSPFDYW	in-frame	212	212	0	0	0	0	0	0	0	0	0
IGHV3-72	F	x	x	IGHJ4	F	IGHG2	F	CTRVSSTWYFDNW	in-frame	212	0	0	0	0	0	0	0	0	212	0
IGHV3-7	F	x	x	IGHJ6	F	IGHG2	F	CARDAGWGLQGYGMDVW	in-frame	212	0	0	0	212	0	0	0	0	0	0
IGHV3-53	F	x	x	IGHJ5	F	IGHG2	F	CAKEGLRIGGGWFDPW	in-frame	212	0	0	0	0	0	0	0	0	212	0
IGHV1-69D	F	x	x	IGHJ6	F	IGHG1	F	CASPVSWNPRFGGFPYCMDVW	in-frame	212	0	0	0	0	0	0	0	0	0	212
IGHV4-61	ORF	x	x	IGHJ5	F	IGHG2	F	CAVEIVLVPAVISWFDPW	in-frame	211	0	0	0	0	211	0	0	0	0	0
IGHV4-39	F	x	x	IGHJ5	F	IGHG3	F	CARHFHSDSGWYREDWFDPW	in-frame	211	211	0	0	0	0	0	0	0	0	0
IGHV3-9	F	x	x	IGHJ4	F	IGHG1	F	CAKDSALYYFGLGTTGFDYW	in-frame	211	0	0	0	0	0	0	0	0	211	0
IGHV3-53	F	x	x	IGHJ4	F	IGHG1	F	CAKVGRAYSFDLW	in-frame	211	0	0	0	0	0	211	0	0	0	0
IGHV3-23D	F	IGHD3-10	F	IGHJ2	F	IGHG1	F	CANGPPEGYYDSGNYWYFDLW	in-frame	210	0	0	0	0	0	210	0	0	0	0
IGHV3-13	F	x	x	IGHJ6	F	IGHG2	F	CARSLSTRFGQSHGMDVW	in-frame	210	0	0	210	0	0	0	0	0	0	0
IGHV3-11	F	x	x	IGHJ3	F	IGHG2	F	CARIPTGLVDPGAFDFW	in-frame	210	0	0	0	0	0	0	0	0	210	0
IGHV1-3	F	x	x	IGHJ4	F	IGHG1	F	CGRDRQSIDHW	in-frame	210	0	0	0	0	0	0	0	210	0	0
IGHV1-18	F	x	x	IGHJ4	F	IGHG2	F	CARHEDWAFDFW	in-frame	210	0	0	0	0	0	0	0	0	0	210
IGHV3-49	F	IGHD1-26	F	IGHJ3	F	IGHG2	F	CTRVREGATTGAFDIW	in-frame	209	209	0	0	0	0	0	0	0	0	0
IGHV3-15	F	x	x	IGHJ4	F	IGHG2	F	CTTGGVSGKYYPDFGYW	in-frame	209	209	0	0	0	0	0	0	0	0	0
IGHV1-8	F	x	x	IGHJ4	F	IGHG1	F	CARVVSGPDYW	in-frame	209	209	0	0	0	0	0	0	0	0	0
IGHV1-24	F	x	x	IGHJ4	F	IGHG1	F	CATDEGDGHYFDSW	in-frame	209	0	0	0	0	0	0	0	209	0	0
IGHV1-3	F	IGHD4-17	F	IGHJ4	F	IGHG1	F	CARTPSDYGDYYFDFW	in-frame	208	208	0	0	0	0	0	0	0	0	0
IGHV4-59	F	IGHD5-24	ORF	IGHJ4	F	IGHG1	F	CARCDGYNYGIFDYW	in-frame	207	207	0	0	0	0	0	0	0	0	0
IGHV4-4	F	x	x	IGHJ4	F	IGHG2	F	CARVRVEMVATLWSKPFDYW	in-frame	207	0	0	0	0	0	0	0	207	0	0
IGHV4-39	F	x	x	IGHJ6	F	IGHG1	F	CATQYRSPLGLYYYFYMDVW	in-frame	207	0	0	0	0	0	207	0	0	0	0
IGHV3-48	F	x	x	IGHJ4	F	IGHG2	F	CARGIGWNYARCFDYW	in-frame	207	0	0	0	0	0	0	0	0	0	207
IGHV3-48	F	x	x	IGHJ2	F	IGHG1	F	CARVTTRYFDLW	in-frame	207	207	0	0	0	0	0	0	0	0	0
IGHV3-48	F	IGHD6-13	F	IGHJ6	F	IGHG1	F	CARRQQLVPGTPNYYYYYGMDVW	in-frame	207	0	207	0	0	0	0	0	0	0	0
IGHV3-23	F	x	x	IGHJ4	F	IGHG2	F	CVKQYRGFEGEYW	in-frame	207	0	0	0	0	0	207	0	0	0	0
IGHV5-51	F	IGHD6-19	F	IGHJ4	F	IGHG2	F	CARPGLEMSSGWFDYW	in-frame	206	0	0	206	0	0	0	0	0	0	0
IGHV5-51	F	IGHD2-21	F	IGHJ6	F	IGHG2	F	CARRSYCVGDCTLNPSYYHGMDVW	in-frame	206	0	0	206	0	0	0	0	0	0	0
IGHV4-34,IGHV4-31	F	x	x	IGHJ6	F	IGHG2	F	CARATATGGLGVW	in-frame	206	0	0	0	0	206	0	0	0	0	0
IGHV3-23D	F	x	x	IGHJ5	F	IGHG1	F	CAKDWGGFAIVGNWFDPW	in-frame	206	0	0	206	0	0	0	0	0	0	0
IGHV3-15	F	x	x	IGHJ5,IGHJ4	F	IGHG2	F	CTTLGKIVW	in-frame	206	206	0	0	0	0	0	0	0	0	0
IGHV3-11	F	x	x	IGHJ4	F	IGHG2	F	CARDPGHHFDSW	in-frame	206	206	0	0	0	0	0	0	0	0	0
IGHV1-3	F	x	x	IGHJ4	F	IGHG2	F	CARDLGSSGKFYTPTNYW	in-frame	206	0	0	0	0	0	0	0	206	0	0
IGHV3-74	F	IGHD3-10	F	IGHJ4	F	IGHG1	F	CARGGPFYYGSGSTDYW	in-frame	205	205	0	0	0	0	0	0	0	0	0
IGHV3-73	F	x	x	IGHJ5,IGHJ4	F	IGHG2	F	CVRTAITVPGYDGYFW	in-frame	205	0	0	205	0	0	0	0	0	0	0
IGHV3-11	F	IGHD1-26	F	IGHJ5	F	IGHG2	F	CARPYSGSHPLRSW	in-frame	205	205	0	0	0	0	0	0	0	0	0
IGHV1-69D	F	IGHD5-24	ORF	IGHJ4	F	IGHG1	F	CARLNRDGYRPVDLDDW	in-frame	205	0	0	205	0	0	0	0	0	0	0
IGHV4-61	F	IGHD3-10	F	IGHJ3	F	IGHG2	F	CARGAHGSGTYYNDALDVW	in-frame	204	0	0	0	0	0	204	0	0	0	0
IGHV3-74	F	x	x	IGHJ6	F	IGHG2	F	CSRVIVFPGIGTDVW	in-frame	204	0	0	0	204	0	0	0	0	0	0
IGHV3-71	P	x	x	IGHJ4	F	IGHG2	F	CVKGPLTTATGEYW	in-frame	204	0	0	0	0	0	0	0	0	204	0
IGHV3-64	F	IGHD2-15	F	IGHJ2	F	IGHG2	F	CARGTVVAGHWYFDLW	in-frame	204	204	0	0	0	0	0	0	0	0	0
IGHV3-15	F	x	x	IGHJ5,IGHJ4	F	IGHG2	F	CTRIGMKQEFNLW	in-frame	204	0	0	0	0	0	0	0	204	0	0
IGHV2-70,IGHV2-5	F	IGHD3-16	F	IGHJ4	F	IGHG1	F	CAHLLLVWSSDWGSFRPPGFDHW	in-frame	204	0	0	204	0	0	0	0	0	0	0
IGHV1-18	F	IGHD3-9	F	IGHJ6	F	IGHG2	F	CARGILPGYHNVMNDYYGMDVW	in-frame	204	0	0	0	0	0	204	0	0	0	0
IGHV1-18	F	IGHD2-2	F	IGHJ4	F	IGHG2	F	CARDPHSWGRWVPAAPDYW	in-frame	204	0	0	0	0	204	0	0	0	0	0
IGHV4-61	F	x	x	IGHJ6	F	IGHG1	F	CARVKPARAGTYSYYGLDVW	in-frame	203	0	0	0	0	0	0	0	0	203	0
IGHV3-7	F	x	x	IGHJ4	F	IGHG2	F	CATGSRTFSSW	in-frame	203	0	0	0	0	0	0	0	0	203	0
IGHV3-53	F	x	x	IGHJ4	F	IGHG2	F	CARDGRPGDLFSFDYW	in-frame	203	0	0	0	0	0	0	0	0	203	0
IGHV3-30-3	F	x	x	IGHJ4	F	IGHG3	F	CARDNTGFGEPFDYW	in-frame	203	0	0	0	0	0	0	0	0	203	0
IGHV3-11	F	x	x	IGHJ6	F	IGHG2	F	CARNYGNYYGLDVW	in-frame	203	0	0	0	0	0	0	0	0	203	0
IGHV2-5	F	x	x	IGHJ4	F	IGHG1	F	CAHRPGTWVLGYFDYW	in-frame	203	0	0	0	0	0	0	0	0	0	203
IGHV1-8	F	IGHD1-26	F	IGHJ4	F	IGHG1	F	CARVRRIVGATNVFWDYFDYW	in-frame	203	0	0	0	0	0	0	0	0	203	0
IGHV7-4-1	F	x	x	IGHJ4	F	IGHG1	F	CARRVKLSGYFDSW	in-frame	202	0	0	0	0	0	202	0	0	0	0
IGHV4-61,IGHV4-59	F	x	x	IGHJ5,IGHJ4	F	IGHG2	F	CAKGRVPGT*W	out-of-frame	202	0	0	0	0	0	0	0	202	0	0
IGHV4-61	F	x	x	IGHJ4	F	IGHG1	F	CARMPGLVRRAFDYW	in-frame	202	0	0	0	0	0	0	0	0	202	0
IGHV3-NL1	F	x	x	IGHJ4	F	IGHG2	F	CAKESHNNGYGSYFDSW	in-frame	202	0	0	0	0	0	0	0	0	202	0
IGHV3-9	F	x	x	IGHJ4	F	IGHG1	F	CAKDMAKYNWQSGGFDYW	in-frame	202	0	0	202	0	0	0	0	0	0	0
IGHV3-33	F	IGHD1-26	F	IGHJ3	F	IGHG2	F	CAREAYSGTYLNALDIW	in-frame	202	0	0	0	0	0	202	0	0	0	0
IGHV3-23D	F	x	x	IGHJ4	F	IGHG2	F	CAKRREPFDYW	in-frame	202	0	0	0	0	0	0	0	0	202	0
IGHV3-23D	F	x	x	IGHJ2	F	IGHG1	F	CAKSHNWIFDLW	in-frame	202	0	0	0	0	0	202	0	0	0	0
IGHV2-5	F	x	x	IGHJ5	F	IGHG2	F	CAYRISVNYFVSGRWPDWFGPW	in-frame	202	0	0	0	0	0	0	0	202	0	0
IGHV1-3	F	x	x	IGHJ5	F	IGHG1	F	CAREIRVSGGWHGYFDPW	in-frame	202	0	0	202	0	0	0	0	0	0	0
IGHV1-24	F	IGHD4-17	F	IGHJ6	F	IGHG1	F	CASTVDYYYGMDVW	in-frame	202	0	0	0	0	0	0	0	0	0	202
IGHV1-2	F	x	x	IGHJ4	F	IGHG1	F	CAVVMGPYYW	in-frame	202	0	0	0	0	0	0	0	0	0	202
IGHV1-18	F	x	x	IGHJ4	F	IGHG2	F	CASDADRRDDYW	in-frame	202	0	0	0	0	0	0	0	0	0	202
IGHV4-55,IGHV4-4	P	x	x	IGHJ3	F	IGHG1	F	CARDYNGYDRDAFDIW	in-frame	201	0	0	0	0	0	0	0	0	201	0
IGHV4-39	F	IGHD3-16	F	IGHJ4	F	IGHG1	F	CARSPIRRLGELSPDFDFW	in-frame	201	201	0	0	0	0	0	0	0	0	0
IGHV3-74	F	IGHD2-2	F	IGHJ4	F	IGHG2	F	CAPYCSSTKCYKRGVADFW	in-frame	201	0	0	0	0	0	0	201	0	0	0
IGHV3-48	F	x	x	IGHJ1	F	IGHG1	F	CARDSGYSTSWPEYFHHW	in-frame	201	201	0	0	0	0	0	0	0	0	0
IGHV2-5	F	x	x	IGHJ3	F	IGHG1	F	CTHIGVPVPGDDGVYAFDIW	in-frame	201	0	0	201	0	0	0	0	0	0	0
IGHV1-46	F	x	x	IGHJ5	F	IGHG2	F	CARDGSAVVVWWFDPW	in-frame	201	0	0	0	0	0	0	0	0	201	0
IGHV1-18	F	x	x	IGHJ4	F	IGHG2	F	CARDDGRDAGSYCHW	in-frame	201	0	0	201	0	0	0	0	0	0	0
IGHV4-61	F	x	x	IGHJ5	F	IGHG2	F	CAREDSWRGTAPKGWFDPW	in-frame	200	0	0	0	0	0	0	0	0	200	0
IGHV3-74	F	x	x	IGHJ4	F	IGHG2	F	CARDVFGVDDCW	in-frame	200	0	0	0	0	0	0	0	0	0	200
IGHV3-73	F	IGHD6-19	F	IGHJ5,IGHJ4	F	IGHG1	F	CTRQGSSGWY**W	out-of-frame	200	0	0	0	0	0	0	0	0	200	0
IGHV3-64,IGHV3-30-3,IGHV3-30	F	x	x	IGHJ4	F	IGHG1	F	CARYSVLFMNRGDSVGAGFDLW	in-frame	200	0	0	0	0	0	0	0	0	200	0
IGHV2-70D,IGHV2-70	F	IGHD5-24	ORF	IGHJ4	F	IGHG1	F	CARGGDGYSYIDYW	in-frame	200	0	0	200	0	0	0	0	0	0	0
IGHV1-46	F	IGHD1-26	F	IGHJ5,IGHJ4	F	IGHG2	F	CARDSGSYWFDYW	in-frame	200	0	0	0	0	0	0	0	200	0	0
IGHV1-18	F	x	x	IGHJ4	F	IGHG1	F	CARVDDTSGHYAFDFW	in-frame	200	0	0	0	0	200	0	0	0	0	0
IGHV4-59	F	x	x	IGHJ5	F	IGHG2	F	CARFHPNDDDVNWFDPW	in-frame	199	0	0	0	0	0	199	0	0	0	0
IGHV4-30-4	F	x	x	IGHJ5	F	IGHG2	F	CARAEGYSGVGAFVRWFESW	in-frame	199	0	0	0	0	0	0	199	0	0	0
IGHV3-53	F	x	x	IGHJ4	F	IGHG2	F	CARGGYPGGFYFDYW	in-frame	199	0	0	0	0	0	0	0	0	199	0
IGHV3-15	F	x	x	IGHJ5,IGHJ4	F	IGHG2	F	CTTGGLGQW	in-frame	199	0	0	199	0	0	0	0	0	0	0
IGHV2-5	F	x	x	IGHJ2	F	IGHG1	F	CAHAGTFYYFDLW	in-frame	199	0	0	0	0	199	0	0	0	0	0
IGHV2-26	F	IGHD6-6	F	IGHJ5	F	IGHG1	F	CARINIAVRRREFDPW	in-frame	199	0	0	0	0	0	0	0	0	0	199
IGHV5-51	F	IGHD5-12	F	IGHJ4	F	IGHG2	F	CARQPDSGYDVLDYW	in-frame	198	0	0	0	0	0	198	0	0	0	0
IGHV4-4,IGHV4-39	F	x	x	IGHJ4	F	IGHG1	F	CARGVIRRRAYFDSW	in-frame	198	0	0	0	0	0	0	0	0	198	0
IGHV4-34	F	x	x	IGHJ5	F	IGHG2	F	CARGRSSRARGNWFDPW	in-frame	198	198	0	0	0	0	0	0	0	0	0
IGHV3-7	F	x	x	IGHJ6	F	IGHG2	F	CAREVGADWYYYNYYMDVW	in-frame	198	0	0	0	0	0	0	0	0	198	0
IGHV3-53	F	x	x	IGHJ6	F	IGHG2	F	CARVPTPDTDIVYYFYYMDVW	in-frame	198	0	0	0	0	0	0	0	0	198	0
IGHV3-23	F	x	x	IGHJ4	F	IGHG2	F	CAKMDGPIMSGWNFDHW	in-frame	198	0	0	198	0	0	0	0	0	0	0
IGHV2-70D,IGHV2-70	F	x	x	IGHJ3	F	IGHG1	F	CARMQSHMESFDIW	in-frame	198	0	0	0	0	0	0	0	0	198	0
IGHV1-69D	F	IGHD3-9	F	IGHJ5	F	IGHG1	F	CARDYDILTGEEGDHW	in-frame	198	0	0	0	0	0	0	198	0	0	0
IGHV4-61,IGHV4-59	F	x	x	IGHJ4	F	IGHG2	F	CAREPTYSGYFESW	in-frame	197	0	0	0	0	0	0	0	197	0	0
IGHV4-59	F	x	x	IGHJ4	F	IGHG2	F	CARGGSKEWLLDHYW	in-frame	197	0	0	0	197	0	0	0	0	0	0
IGHV4-34	F	IGHD3-22	F	IGHJ4	F	IGHG1	F	CARGTIKRPFYDSGSYYYPHFDYW	in-frame	197	0	0	0	0	0	197	0	0	0	0
IGHV3-74	F	x	x	IGHJ4	F	IGHG2	F	CAKTYGWVFDYW	in-frame	197	197	0	0	0	0	0	0	0	0	0
IGHV3-53	F	x	x	IGHJ4	F	IGHG2	F	CARDLGDW	in-frame	197	0	0	197	0	0	0	0	0	0	0
IGHV3-33	F	IGHD3-10	F	IGHJ4	F	IGHG1	F	CARDPTYGSGSPRYW	in-frame	197	0	0	0	0	0	197	0	0	0	0
IGHV3-30-3	F	x	x	IGHJ5	F	IGHG4	F	CARAGSTVAVGHLDSW	in-frame	197	0	0	0	197	0	0	0	0	0	0
IGHV3-23D	F	IGHD5-12	F	IGHJ3	F	IGHG1	F	CAKGLWYSGYEGGGNDAFEIW	in-frame	197	0	0	0	197	0	0	0	0	0	0
IGHV3-15	F	IGHD3-22	F	IGHJ5	F	IGHG2	F	CTTDGTSHYYDGSGLPTGFDPW	in-frame	197	0	0	0	0	0	0	0	197	0	0
IGHV1-3	F	IGHD3-10	F	IGHJ5	F	IGHG2	F	CAGTHYYDSGNYYRLDSW	in-frame	197	197	0	0	0	0	0	0	0	0	0
IGHV3-15	F	x	x	IGHJ4	F	IGHG2	F	CTTAGFTSGRLDYW	in-frame	196	0	0	0	196	0	0	0	0	0	0
IGHV1-3	F	x	x	IGHJ4	F	IGHG2	F	CARRGIGNNYDYW	in-frame	196	0	0	0	0	0	0	0	196	0	0
IGHV1-18	F	x	x	IGHJ6	F	IGHG4	F	CATGITATSNYYFYGLDVW	in-frame	196	0	0	0	0	0	0	196	0	0	0
IGHV5-51	F	IGHD5-12	F	IGHJ6	F	IGHG2	F	CARHRYSGFDYDDSHYYFYMDVW	in-frame	195	0	0	0	0	0	195	0	0	0	0
IGHV4-34,IGHV4-31	F	x	x	IGHJ5	F	IGHG2	F	CARGGPLRRHRGKLESW	in-frame	195	195	0	0	0	0	0	0	0	0	0
IGHV3-64,IGHV3-48,IGHV3-30-3	F	IGHD6-13	F	IGHJ6	F	IGHG1	F	CARERRWAAAGWGYGMDVW	in-frame	195	0	0	0	0	0	0	0	0	195	0
IGHV3-15	F	x	x	IGHJ1	F	IGHG2	F	CTTDMKYGGISGFW	in-frame	195	0	0	0	0	0	0	0	0	195	0
IGHV3-9	F	x	x	IGHJ6	F	IGHG1	F	CAKDIDYEISTPNSYAMDVW	in-frame	194	0	0	0	0	0	194	0	0	0	0
IGHV3-9	F	IGHD3-22	F	IGHJ3	F	IGHG1	F	CAKDVHYDSSGYSSNAFDIW	in-frame	194	0	0	0	0	0	194	0	0	0	0
IGHV3-74	F	x	x	IGHJ6	F	IGHG2	F	CARAGGYEFIHRYFYGLDVW	in-frame	194	194	0	0	0	0	0	0	0	0	0
IGHV3-7,IGHV3-69-1,IGHV3-48	F	x	x	IGHJ4	F	IGHG1	F	CAREKPRSGSLDFW	in-frame	194	0	0	0	0	0	0	0	0	194	0
IGHV3-48	F	x	x	IGHJ4	F	IGHG1	F	CARDPRGANFRYNYFDYW	in-frame	194	194	0	0	0	0	0	0	0	0	0
IGHV3-15	F	x	x	IGHJ6	F	IGHG2	F	CTTDQYSTYYYYGMDVW	in-frame	194	0	0	194	0	0	0	0	0	0	0
IGHV1-3	F	x	x	IGHJ4	F	IGHG2	F	CVRKDWYASGTYHFDNW	in-frame	194	0	0	0	0	0	0	0	194	0	0
IGHV1-24	F	IGHD1-26	F	IGHJ4	F	IGHG2	F	CARETPDSGSYWGGHFDYW	in-frame	194	0	0	0	0	0	194	0	0	0	0
IGHV4-39	F	IGHD6-19	F	IGHJ4	F	IGHG1	F	CANEQWLDRTFDYW	in-frame	193	0	0	193	0	0	0	0	0	0	0
IGHV4-39	F	IGHD5-24	ORF	IGHJ3	F	IGHG1	F	CATSPGMATINGRGAFDIW	in-frame	193	0	0	0	0	0	193	0	0	0	0
IGHV4-39	F	IGHD4-23	ORF	IGHJ3	F	IGHG1	F	CARDRTTVVTPSAFDIW	in-frame	193	0	0	0	0	0	0	0	0	193	0
IGHV4-34	F	x	x	IGHJ5	F	IGHG2	F	CARRLKTLTAAGIRWPASGGIDPW	in-frame	193	0	0	0	0	193	0	0	0	0	0
IGHV4-34	F	IGHD5-5,IGHD5-18	F	IGHJ5,IGHJ4	F	IGHG2	F	CARGYSYGFAGLW	in-frame	193	0	0	193	0	0	0	0	0	0	0
IGHV3-74	F	x	x	IGHJ4	F	IGHG2	F	CVRDLFGADDFW	in-frame	193	0	0	0	0	0	0	0	0	0	193
IGHV3-15	F	x	x	IGHJ4	F	IGHG2	F	CGTWYHKVAGTDYW	in-frame	193	0	0	193	0	0	0	0	0	0	0
IGHV2-70D,IGHV2-70	F	x	x	IGHJ3	F	IGHG2	F	CARTLARPVGGWKRDDAFDIW	in-frame	193	0	0	193	0	0	0	0	0	0	0
IGHV2-70D,IGHV2-70	F	x	x	IGHJ3	F	IGHG1	F	CARRRASGRAFDVW	in-frame	193	193	0	0	0	0	0	0	0	0	0
IGHV2-5	F	x	x	IGHJ5	F	IGHG2	F	CAHSGYYDRTGYYNYFDPW	in-frame	193	0	0	0	193	0	0	0	0	0	0
IGHV2-5	F	x	x	IGHJ4	F	IGHG2	F	CAHTAGWLPDYW	in-frame	193	0	0	193	0	0	0	0	0	0	0
IGHV1-18	F	IGHD3-22	F	IGHJ4	F	IGHG1	F	CARAQFYDSSGSADYYFDYW	in-frame	193	0	0	0	0	0	0	0	0	193	0
IGHV5-51	F	IGHD3-10	F	IGHJ4	F	IGHG1	F	CAVTYYSVSGSYSSPFDYW	in-frame	192	192	0	0	0	0	0	0	0	0	0
IGHV4-59	F	IGHD6-13	F	IGHJ4	F	IGHG2	F	CARGGTSSWYGAGRFDYW	in-frame	192	0	0	192	0	0	0	0	0	0	0
IGHV4-34,IGHV4-31	F	x	x	IGHJ5	F	IGHG1	F	CARDDRGYNLGFDPW	in-frame	192	0	0	0	0	0	0	192	0	0	0
IGHV4-34	F	x	x	IGHJ4	F	IGHG1	F	CARGATVVLDYW	in-frame	192	0	0	0	192	0	0	0	0	0	0
IGHV3-74	F	x	x	IGHJ5	F	IGHG2	F	CARDLGLRGGLW	in-frame	192	192	0	0	0	0	0	0	0	0	0
IGHV3-49	F	IGHD2-15	F	IGHJ6	F	IGHG1	F	CTREGRYCSGGSCSRLVDVW	in-frame	192	192	0	0	0	0	0	0	0	0	0
IGHV3-20	ORF	x	x	IGHJ6	F	IGHG2	F	CARSSRGRNSFPFYYMDVW	in-frame	192	0	0	0	0	0	0	0	0	192	0
IGHV3-15	F	x	x	IGHJ3	F	IGHG2	F	CARAPVVANW	in-frame	192	0	0	0	0	0	0	0	0	192	0
IGHV3-11	F	x	x	IGHJ6	F	IGHG2	F	CARNFYSWNVGSNAMDVW	in-frame	192	192	0	0	0	0	0	0	0	0	0
IGHV4-61,IGHV4-59	F	IGHD3-22	F	IGHJ5	F	IGHG2	F	CARDKWIYYDSSGYYYEWFDPW	in-frame	191	0	0	0	0	0	191	0	0	0	0
IGHV4-61	F	x	x	IGHJ3	F	IGHG2	F	CAREDYDAFEIW	in-frame	191	0	0	0	0	0	0	0	0	191	0
IGHV4-59	F	x	x	IGHJ6	F	IGHG1	F	CARQPSQTGRDQYYYGMDVW	in-frame	191	0	0	191	0	0	0	0	0	0	0
IGHV4-39	F	IGHD2-15	F	IGHJ4	F	IGHG1	F	CARDYCSGGSCFPDYW	in-frame	191	0	0	0	0	0	0	0	191	0	0
IGHV3-9	F	x	x	IGHJ3	F	IGHG1	F	CAKDSPWGGLLHAFAIW	in-frame	191	0	0	0	0	0	0	0	191	0	0
IGHV3-11	F	IGHD3-3	F	IGHJ4	F	IGHG1	F	CARDTPTYYDFWSGYSPLDYW	in-frame	191	0	0	0	0	0	0	0	0	191	0
IGHV1-3	F	IGHD3-10	F	IGHJ6	F	IGHG2	F	CANLFYNSGIYAAMDVW	in-frame	191	0	0	0	0	0	0	0	0	0	191
IGHV1-24	F	x	x	IGHJ5,IGHJ4	F	IGHG2	F	CATLPRSAVGTRGW	in-frame	191	0	0	191	0	0	0	0	0	0	0
IGHV1-18	F	x	x	IGHJ6	F	IGHG1	F	CARARRRRLYGDDTFWRGGIVEYYGLDVW	in-frame	191	0	0	0	0	0	0	0	0	191	0
IGHV1-18	F	x	x	IGHJ4	F	IGHG3	F	CARQATQWDLLQERTYYFDYW	in-frame	191	191	0	0	0	0	0	0	0	0	0
IGHV1-18	F	x	x	IGHJ4	F	IGHG1	F	CARNGSSWSDYW	in-frame	191	0	0	0	0	0	191	0	0	0	0
IGHV5-51	F	x	x	IGHJ4	F	IGHG2	F	CARRAAGSAPGEFDYW	in-frame	190	190	0	0	0	0	0	0	0	0	0
IGHV3-9	F	x	x	IGHJ4	F	IGHG1	F	CARDKDSTTMNLFDYW	in-frame	190	0	0	0	0	0	0	0	190	0	0
IGHV3-23D	F	x	x	IGHJ1	F	IGHG1	F	CAKEGFWEYFQYW	in-frame	190	0	0	0	0	0	190	0	0	0	0
IGHV3-15	F	x	x	IGHJ4	F	IGHG2	F	CAAVKDMSSWALDGW	in-frame	190	0	0	0	190	0	0	0	0	0	0
IGHV3-15	F	x	x	IGHJ3	F	IGHG2	F	CTTDLGHRPSSAWLGIAFDLW	in-frame	190	0	0	0	0	0	0	190	0	0	0
IGHV3-11	F	x	x	IGHJ5	F	IGHG2	F	CARDRTPARTTWYPDSW	in-frame	190	0	0	190	0	0	0	0	0	0	0
IGHV2-5	F	x	x	IGHJ4	F	IGHG2	F	CARKGLRGLFEHW	in-frame	190	0	0	0	0	0	0	190	0	0	0
IGHV1-3	F	x	x	IGHJ6	F	IGHG2	F	CATNSGMDVW	in-frame	190	0	0	0	0	0	0	0	0	190	0
IGHV1-3	F	IGHD3-10	F	IGHJ6	F	IGHG2	F	CANLFYGSGGYSAMDVW	in-frame	190	0	0	0	0	0	0	0	0	0	190
IGHV4-61	F	IGHD3-10	F	IGHJ4	F	IGHG1	F	CARVPQHFYGSGNYFNDYYSDYW	in-frame	189	189	0	0	0	0	0	0	0	0	0
IGHV4-39	F	IGHD3-10	F	IGHJ4	F	IGHG3	F	CARHSGSYYVSFDHW	in-frame	189	0	0	0	0	0	0	189	0	0	0
IGHV3-7	F	x	x	IGHJ4	F	IGHG2	F	CVRTLTSRRGEEDNW	in-frame	189	0	0	0	0	0	0	0	0	189	0
IGHV3-23	F	x	x	IGHJ4	F	IGHG1	F	CAKAPSGGWCAGCYFDHW	in-frame	189	0	0	0	0	0	189	0	0	0	0
IGHV1-2	F	IGHD3-10	F	IGHJ4	F	IGHG1	F	CARDLYAPSLLWFGELFSWGNGYW	in-frame	189	0	0	189	0	0	0	0	0	0	0
IGHV1-18	F	x	x	IGHJ6	F	IGHG1	F	CARAGGDTTYYYYALDVW	in-frame	189	0	0	0	0	0	0	0	0	0	189
IGHV3-30-3	F	x	x	IGHJ4	F	IGHG2	F	CARGAGEAGLAYW	in-frame	188	188	0	0	0	0	0	0	0	0	0
IGHV3-15	F	x	x	IGHJ6	F	IGHG2	F	CVWIQRSCLTTSCPGDDSYYYYLDVW	in-frame	188	0	0	0	0	0	0	188	0	0	0
IGHV3-15	F	x	x	IGHJ6	F	IGHG2	F	CATGYFGEGTYFYHYMDVW	in-frame	188	0	0	0	0	0	188	0	0	0	0
IGHV2-70,IGHV2-5	F	IGHD3-9	F	IGHJ4	F	IGHG1	F	CAHIPQEGPYYGILTPYTYHFDYW	in-frame	188	0	0	188	0	0	0	0	0	0	0
IGHV5-51	F	IGHD2-15	F	IGHJ4	F	IGHG2	F	CARGPYCSGGSCSPFDYW	in-frame	187	0	0	187	0	0	0	0	0	0	0
IGHV3-7,IGHV3-69-1,IGHV3-48	F	x	x	IGHJ3	F	IGHG2	F	CAREAAISGDWDDAFDLW	in-frame	187	0	0	0	187	0	0	0	0	0	0
IGHV3-7	F	x	x	IGHJ6	F	IGHG2	F	CARSRFMDVW	in-frame	187	0	0	0	0	0	0	187	0	0	0
IGHV3-64	F	x	x	IGHJ5	F	IGHG2	F	CAGWSPGYYPW	in-frame	187	0	0	187	0	0	0	0	0	0	0
IGHV3-53	F	x	x	IGHJ3	F	IGHG2	F	CARPHSAAYQYSFDIW	in-frame	187	0	0	0	0	0	0	0	0	187	0
IGHV3-48	F	x	x	IGHJ6	F	IGHG2	F	CLVMGVW	in-frame	187	0	0	0	0	0	0	0	0	0	187
IGHV2-70,IGHV2-5	F	x	x	IGHJ4	F	IGHG2	F	CAHRHPSYHYDGTGYNVLLFKYW	in-frame	187	0	187	0	0	0	0	0	0	0	0
IGHV2-5	F	x	x	IGHJ4	F	IGHG1	F	CAYKGNTGGYFGYW	in-frame	187	0	0	0	0	0	0	187	0	0	0
IGHV1-3	F	x	x	IGHJ5	F	IGHG2	F	CTTKGRGMSTVWFDPW	in-frame	187	0	0	0	0	0	0	0	187	0	0
IGHV1-3	F	x	x	IGHJ4,IGHJ5	F	IGHG2	F	CARGLVTASQGSW	in-frame	187	187	0	0	0	0	0	0	0	0	0
IGHV1-18	F	IGHD6-19	F	IGHJ5	F	IGHG1	F	CARDRQWLGDNWFDPW	in-frame	187	0	0	187	0	0	0	0	0	0	0
IGHV1-18	F	IGHD3-22	F	IGHJ4	F	IGHG2	F	CARNDSSGYPYW	in-frame	187	0	0	0	0	0	187	0	0	0	0
IGHV5-51	F	IGHD6-6	F	IGHJ6	F	IGHG1	F	CARHHSSSGPHYYYGMDVW	in-frame	186	0	0	0	0	0	0	0	0	186	0
IGHV4-61	F	x	x	IGHJ3	F	IGHG4	F	CARAFPRNRHALEIW	in-frame	186	0	0	0	0	0	186	0	0	0	0
IGHV4-39	F	x	x	IGHJ3	F	IGHG1	F	CATPSGTYGGNAYDIW	in-frame	186	186	0	0	0	0	0	0	0	0	0
IGHV4-34,IGHV4-59,IGHV4-39	F	x	x	IGHJ4	F	IGHG2	F	CAASPSFVNNDRHRSPLDHW	in-frame	186	0	0	0	186	0	0	0	0	0	0
IGHV3-15	F	x	x	IGHJ4	F	IGHG1	F	CTTWATTQDQDYW	in-frame	186	186	0	0	0	0	0	0	0	0	0
IGHV2-5	F	x	x	IGHJ6	F	IGHG1	F	CAQIRGAGTEEDYNYYYYMGVW	in-frame	186	0	0	0	0	0	0	0	186	0	0
IGHV1-2,IGHV1-58	F	x	x	IGHJ4	F	IGHG1	F	CVRGGKGACSGVACYRRDYW	in-frame	186	186	0	0	0	0	0	0	0	0	0
IGHV1-18	F	x	x	IGHJ4	F	IGHG2	F	CARAGRGTYYYFDLW	in-frame	186	186	0	0	0	0	0	0	0	0	0
IGHV1-18	F	x	x	IGHJ3	F	IGHG1	F	CARVRKSGYYDHDAFDIW	in-frame	186	0	0	0	0	0	186	0	0	0	0
IGHV3-9	F	IGHD3-16	F	IGHJ4	F	IGHG1	F	CGKDINDYLWGSYRYSLDYW	in-frame	185	0	0	185	0	0	0	0	0	0	0
IGHV3-9	F	IGHD3-10	F	IGHJ4	F	IGHG1	F	CAKDGSLWFGEGIEFDYW	in-frame	185	0	0	0	0	0	0	0	0	0	185
IGHV3-74	F	x	x	IGHJ6	F	IGHG2	F	CARAGAYEYIHLYFYGMDVW	in-frame	185	185	0	0	0	0	0	0	0	0	0
IGHV3-7,IGHV3-69-1,IGHV3-48	F	IGHD3-10	F	IGHJ5	F	IGHG1	F	CARGTMVRGATLGAFDPW	in-frame	185	0	0	0	0	0	0	0	0	185	0
IGHV3-53	F	x	x	IGHJ4	F	IGHG2	F	CVRDRAGYCHGGSCRIFDYW	in-frame	185	0	0	0	0	0	185	0	0	0	0
IGHV3-53	F	x	x	IGHJ4	F	IGHG1	F	CARCSESQLLGSFDFW	in-frame	185	0	0	0	0	0	0	0	0	185	0
IGHV3-23D	F	x	x	IGHJ5	F	IGHG2	F	CAKGKSVGVLDWLDPW	in-frame	185	0	0	0	0	0	0	185	0	0	0
IGHV3-15	F	IGHD3-10	F	IGHJ6	F	IGHG3	F	CTSLVREIIISGYYYFRMDVW	in-frame	185	185	0	0	0	0	0	0	0	0	0
IGHV1-3	F	x	x	IGHJ6	F	IGHG2	F	CARSPVPWVW	in-frame	185	185	0	0	0	0	0	0	0	0	0
IGHV4-4	F	x	x	IGHJ4	F	IGHG2	F	CAKDFTASGDHYFDYW	in-frame	184	0	0	0	0	184	0	0	0	0	0
IGHV4-39	F	IGHD6-19	F	IGHJ4	F	IGHG1	F	CARQGRRIAVAGSDFDYW	in-frame	184	0	0	184	0	0	0	0	0	0	0
IGHV3-9	F	x	x	IGHJ6	F	IGHG1	F	CAKDYLVGATRFAYMDVW	in-frame	184	0	0	0	0	184	0	0	0	0	0
IGHV3-48	F	x	x	IGHJ4	F	IGHG2	F	CARRASDYSFDYW	in-frame	184	0	0	0	0	0	0	0	0	0	184
IGHV2-5	F	IGHD3/OR15-3b,IGHD3/OR15-3a	ORF	IGHJ4	F	IGHG3	F	CAHRLVGDFWTGSFDYW	in-frame	184	0	0	0	0	184	0	0	0	0	0
IGHV1-3	F	x	x	IGHJ4	F	IGHG2	F	CASGSAGGWTSSFVYW	in-frame	184	0	0	0	0	0	0	0	184	0	0
IGHV1-3	F	x	x	IGHJ3	F	IGHG2	F	CARVLLGTSWGDAFDIW	in-frame	184	0	184	0	0	0	0	0	0	0	0
IGHV1-18	F	x	x	IGHJ6	F	IGHG2	F	CARGPRLALKDSTRSIEDYYYAMDVW	in-frame	184	0	0	0	0	0	0	184	0	0	0
IGHV1-18	F	x	x	IGHJ3	F	IGHG2	F	CARDLHYSSAYYIGWDDVFDIW	in-frame	184	0	0	0	0	0	0	0	184	0	0
IGHV4-61	F	x	x	IGHJ5,IGHJ4	F	IGHG4	F	CARLKGYYSSWADYW	in-frame	183	0	0	183	0	0	0	0	0	0	0
IGHV3-74	F	x	x	IGHJ4	F	IGHG2	F	CARYRGPFDYW	in-frame	183	0	0	0	0	0	0	0	0	183	0
IGHV3-7	F	x	x	IGHJ4	F	IGHG2	F	CARALYQHLFDYW	in-frame	183	0	0	0	0	0	0	0	0	183	0
IGHV3-49	F	x	x	IGHJ6	F	IGHG2	F	CARGYDHYYCYMDVW	in-frame	183	0	0	0	0	0	0	0	183	0	0
IGHV3-30	F	x	x	IGHJ4	F	IGHG2	F	CVRDGGDGGIDYFDHW	in-frame	183	0	0	0	0	0	0	0	0	183	0
IGHV3-23D,IGHV3-23	F	IGHD6-13	F	IGHJ5	F	IGHG2	F	CVQEGGRYSSSWYISW	in-frame	183	0	0	0	183	0	0	0	0	0	0
IGHV3-23D	F	x	x	IGHJ4	F	IGHG2	F	CAKDFVSASYWFDYW	in-frame	183	0	0	0	183	0	0	0	0	0	0
IGHV2-70D,IGHV2-70	F	x	x	IGHJ5	F	IGHG1	F	CARTDSSLPAPGVDHNWFDPW	in-frame	183	0	0	183	0	0	0	0	0	0	0
IGHV1-3	F	x	x	IGHJ4	F	IGHG2	F	CARDTPYSSSYYFEYW	in-frame	183	0	0	0	0	0	0	0	0	183	0
IGHV4-61	F	x	x	IGHJ5	F	IGHG1	F	CARDVARGAAFWFDPW	in-frame	182	0	0	0	0	0	182	0	0	0	0
IGHV4-34,IGHV4-31	F	x	x	IGHJ4	F	IGHG1	F	CARDLGLRVRYFDYW	in-frame	182	0	0	0	0	0	0	182	0	0	0
IGHV4-34	F	x	x	IGHJ6	F	IGHG3	F	CARVQRASPRGAFRRKFYVYYMDVW	in-frame	182	0	182	0	0	0	0	0	0	0	0
IGHV3-9	F	x	x	IGHJ4	F	IGHG2	F	CAKDSRGSFDYW	in-frame	182	0	0	182	0	0	0	0	0	0	0
IGHV3-7	F	x	x	IGHJ4,IGHJ5	F	IGHG2	F	CMGGRSW	in-frame	182	0	0	0	182	0	0	0	0	0	0
IGHV3-23D	F	x	x	IGHJ4	F	IGHG2	F	CVKQYRGFEGEYW	in-frame	182	0	0	0	0	0	182	0	0	0	0
IGHV3-23D	F	IGHD6-13	F	IGHJ5	F	IGHG2	F	CAQEGGRYSSSWYISW	in-frame	182	0	0	0	182	0	0	0	0	0	0
IGHV3-13	F	x	x	IGHJ6	F	IGHG2	F	CARGKALWELPSRYGLAVW	in-frame	182	182	0	0	0	0	0	0	0	0	0
IGHV3-13	F	x	x	IGHJ3	F	IGHG1	F	CARALTNYYDGRGLPSMSGMAAFDIW	in-frame	182	0	0	0	0	0	182	0	0	0	0
IGHV1-46	F	x	x	IGHJ4	F	IGHG1	F	CARQVGALDSW	in-frame	182	0	0	0	0	0	182	0	0	0	0
IGHV5-51	F	IGHD6-19	F	IGHJ1	F	IGHG2	F	CARHSGSGWFGEYFQRW	in-frame	181	0	0	0	181	0	0	0	0	0	0
IGHV4-39	F	x	x	IGHJ4	F	IGHG1	F	CARLLTDSSYWNW	in-frame	181	0	0	0	0	0	0	0	181	0	0
IGHV4-39	F	IGHD3-22	F	IGHJ6	F	IGHG3	F	CARSYYYSSGWGYYYHYMDIW	in-frame	181	0	0	0	0	0	0	0	0	181	0
IGHV3-9	F	x	x	IGHJ4	F	IGHG1	F	CAKGGTNAREFDSW	in-frame	181	0	0	181	0	0	0	0	0	0	0
IGHV3-72	F	x	x	IGHJ4	F	IGHG1	F	CASKGLGVDYW	in-frame	181	0	0	0	0	0	0	0	0	181	0
IGHV3-23D	F	IGHD6-6	F	IGHJ6	F	IGHG1	F	CARADGIAARLDYYYHMDVW	in-frame	181	0	0	0	0	0	0	0	0	181	0
IGHV3-23	F	x	x	IGHJ4	F	IGHG2	F	CAKDFPSAYDSSKYHDALFAYW	in-frame	181	0	0	0	0	0	181	0	0	0	0
IGHV3-15	F	x	x	IGHJ3	F	IGHG2	F	CVKGKGDYNRGIWYEDAYDIW	in-frame	181	0	0	0	0	0	0	181	0	0	0
IGHV2-70,IGHV2-5	F	x	x	IGHJ4	F	IGHG4	F	CAHITAATAMFDYW	in-frame	181	0	0	0	0	0	181	0	0	0	0
IGHV1-69	F	x	x	IGHJ4	F	IGHG1	F	CARDFKQQLNLLRRFWYFDIW	in-frame	181	0	0	0	0	0	181	0	0	0	0
IGHV1-24	F	x	x	IGHJ2	F	IGHG2	F	CATGIPAAVAYFYFALW	in-frame	181	0	0	181	0	0	0	0	0	0	0
IGHV6-1	F	IGHD6-13	F	IGHJ4	F	IGHG1	F	CVRDAAAGPEYFDYW	in-frame	180	0	0	0	0	0	0	0	0	180	0
IGHV4-61	F	IGHD2-2	F	IGHJ4	F	IGHG1	F	CARKCSSASCSFDYW	in-frame	180	0	0	0	0	0	180	0	0	0	0
IGHV3-69-1,IGHV3-48	P	x	x	IGHJ6	F	IGHG2	F	CVKDNGRLARDSGMDVW	in-frame	180	0	0	0	0	0	0	0	0	0	180
IGHV3-49	F	x	x	IGHJ4	F	IGHG2	F	CSPWVRRSIFEYW	in-frame	180	180	0	0	0	0	0	0	0	0	0
IGHV3-23D	F	IGHD2-21	F	IGHJ4	F	IGHG1	F	CAKSGCGGDCYFDNW	in-frame	180	180	0	0	0	0	0	0	0	0	0
IGHV3-23	F	x	x	IGHJ3	F	IGHG2	F	CAKYVAAFDIW	in-frame	180	0	0	0	0	0	180	0	0	0	0
IGHV3-15	F	IGHD3-10	F	IGHJ4	F	IGHG2	F	CTGRYRYTTMVRGVIDYW	in-frame	180	180	0	0	0	0	0	0	0	0	0
IGHV2-5	F	IGHD3-10	F	IGHJ6	F	IGHG4	F	CAHRRAHYFASGSYKYDFTDVW	in-frame	180	0	0	0	0	180	0	0	0	0	0
IGHV1-24	F	IGHD2-2	F	IGHJ5	F	IGHG1	F	CATFLVPAAMDPLDWFDPW	in-frame	180	0	0	180	0	0	0	0	0	0	0
IGHV5-51	F	IGHD3-22	F	IGHJ6	F	IGHG4	F	CARGPAEYYYEDNGSRYAYSYYYFDVW	in-frame	179	0	0	0	0	179	0	0	0	0	0
IGHV4-39	F	IGHD6-6	F	IGHJ4	F	IGHG2	F	CAGSGGLWYSSSSHYFDSW	in-frame	179	0	0	0	0	0	0	0	0	179	0
IGHV3-9	F	x	x	IGHJ4	F	IGHG2	F	CAKNTAGALAPTGSLDFW	in-frame	179	179	0	0	0	0	0	0	0	0	0
IGHV3-9	F	x	x	IGHJ4	F	IGHG2	F	CAKDQDAGRTAGGSFDYW	in-frame	179	0	0	0	0	0	179	0	0	0	0
IGHV3-9	F	x	x	IGHJ4	F	IGHG1	F	CAKDVWGHGADTHYFDLW	in-frame	179	0	0	179	0	0	0	0	0	0	0
IGHV3-9	F	IGHD6-19	F	IGHJ1	F	IGHG1	F	CAKDPYSSGRSGFFQHW	in-frame	179	179	0	0	0	0	0	0	0	0	0
IGHV3-9	F	IGHD5-24	ORF	IGHJ4	F	IGHG1	F	CAKDKEMATITVFDYW	in-frame	179	0	0	179	0	0	0	0	0	0	0
IGHV3-74	F	IGHD5-12	F	IGHJ4	F	IGHG2	F	CARGTGYDSHVLFDYW	in-frame	179	0	0	0	0	0	0	0	0	0	179
IGHV3-7	F	x	x	IGHJ4	F	IGHG2	F	CAKWRWYQSEFDCW	in-frame	179	0	0	0	0	0	0	0	0	179	0
IGHV3-20	ORF	IGHD3-10	F	IGHJ4	F	IGHG1	F	CARVYGSGSYLDFW	in-frame	179	179	0	0	0	0	0	0	0	0	0
IGHV2-5	F	IGHD3-10	F	IGHJ3	F	IGHG2	F	CANRVVRGVPAFDVW	in-frame	179	0	0	179	0	0	0	0	0	0	0
IGHV1-46	F	x	x	IGHJ6	F	IGHG2	F	CARDAPDYYHYYHGMDVW	in-frame	179	0	0	0	0	0	179	0	0	0	0
IGHV1-3	F	x	x	IGHJ4	F	IGHG3	F	CATWRDGYW	in-frame	179	0	0	0	0	0	0	0	0	179	0
IGHV1-2	F	IGHD1-26	F	IGHJ1	F	IGHG2	F	CARESSGSYGIRYFQDW	in-frame	179	0	0	0	0	0	0	0	0	0	179
IGHV1-18	F	x	x	IGHJ6	F	IGHG2	F	CARDRSHGLDVW	in-frame	179	0	0	0	0	0	0	0	0	0	179
IGHV6-1	F	x	x	IGHJ3	F	IGHG2	F	CARDSGIGLDTFDMW	in-frame	178	178	0	0	0	0	0	0	0	0	0
IGHV4-59,IGHV4-4,IGHV4-39	F	x	x	IGHJ3	F	IGHG2	F	CARGVFSVTNDAFDIW	in-frame	178	0	0	0	0	0	0	0	0	0	178
IGHV4-34	F	x	x	IGHJ4	F	IGHG1	F	CVRRGPYSYGPFDYW	in-frame	178	178	0	0	0	0	0	0	0	0	0
IGHV3-7	F	x	x	IGHJ4	F	IGHG2	F	CARRGYNPDYW	in-frame	178	0	0	0	0	0	0	0	0	178	0
IGHV3-66	F	IGHD3-22	F	IGHJ4	F	IGHG4	F	CARGRYYYDSSLAYW	in-frame	178	0	0	0	178	0	0	0	0	0	0
IGHV3-53	F	x	x	IGHJ6	F	IGHG2	F	CARDTTLVNEYGMDVW	in-frame	178	0	0	0	0	0	0	0	0	178	0
IGHV3-53	F	x	x	IGHJ3	F	IGHG1	F	CATASEAVEVNGAFDFW	in-frame	178	0	0	0	0	0	0	0	178	0	0
IGHV3-49	F	x	x	IGHJ5	F	IGHG1	F	CLRGWRPGSW	in-frame	178	0	0	0	0	0	0	178	0	0	0
IGHV3-33	F	IGHD3-10	F	IGHJ5,IGHJ4	F	IGHG2	F	CARDDQWFGELLIW	in-frame	178	0	0	178	0	0	0	0	0	0	0
IGHV3-23D	F	IGHD4-17	F	IGHJ4	F	IGHG2	F	CAREDFGDYFGLW	in-frame	178	0	0	0	0	0	0	0	0	0	178
IGHV1-3	F	x	x	IGHJ4	F	IGHG2	F	CAREGQWPGLDLDYW	in-frame	178	0	0	0	0	0	0	0	178	0	0
IGHV1-18	F	x	x	IGHJ4	F	IGHG2	F	CARDRKAVAPGKNVFDSW	in-frame	178	178	0	0	0	0	0	0	0	0	0
IGHV1-18	F	x	x	IGHJ4	F	IGHG2	F	CARDRDYNTNGPDYW	in-frame	178	0	0	0	0	0	0	178	0	0	0
IGHV5-51	F	x	x	IGHJ6	F	IGHG2	F	CARYGLSGCNVVGCYQSFFYYGMDVW	in-frame	177	0	0	0	0	0	0	0	0	177	0
IGHV5-51	F	IGHD3-22	F	IGHJ6	F	IGHG2	F	CARLFGGPYESNGYFWQKQYSYGMNIW	in-frame	177	0	0	177	0	0	0	0	0	0	0
IGHV4/OR15-8,IGHV4-61,IGHV4-59,IGHV4-38-2	ORF	x	x	IGHJ5	F	IGHG2	F	CARMGAGHWFDSW	in-frame	177	0	0	0	0	0	0	0	0	0	177
IGHV4/OR15-8	ORF	x	x	IGHJ1	F	IGHG4	F	CVRERFESLRLRYFKVAGYFQNW	in-frame	177	0	0	0	177	0	0	0	0	0	0
IGHV4-61	F	x	x	IGHJ4	F	IGHG2	F	CASLSGSGPRGAFDYW	in-frame	177	0	0	177	0	0	0	0	0	0	0
IGHV4-61	F	x	x	IGHJ1	F	IGHG2	F	CANRRHMSGMGAW	in-frame	177	0	0	0	0	0	177	0	0	0	0
IGHV3-74	F	IGHD3-10	F	IGHJ4	F	IGHG1	F	CARTPDPLWFGEFSLDYW	in-frame	177	177	0	0	0	0	0	0	0	0	0
IGHV3-71	P	x	x	IGHJ4	F	IGHG2	F	CARVGGTGSGFDLW	in-frame	177	0	0	0	0	0	177	0	0	0	0
IGHV3-7,IGHV3-69-1,IGHV3-48,IGHV3-21	F	x	x	IGHJ5	F	IGHG1	F	CARGAYGDSRGWFDPW	in-frame	177	0	0	0	0	0	0	177	0	0	0
IGHV3-7,IGHV3-69-1,IGHV3-48,IGHV3-21	F	IGHD3-10	F	IGHJ4	F	IGHG1	F	CARDSVTTIRGVMSYW	in-frame	177	177	0	0	0	0	0	0	0	0	0
IGHV3-66,IGHV3-33,IGHV3-30	F	IGHD2-2	F	IGHJ4	F	IGHG2	F	CAREGIVVVPPIMHVINYFDYW	in-frame	177	0	0	0	0	0	177	0	0	0	0
IGHV3-64	F	x	x	IGHJ4	F	IGHG2	F	CARSAFNTVVPAAISLPDFW	in-frame	177	0	0	0	0	0	0	0	0	177	0
IGHV3-53	F	x	x	IGHJ2	F	IGHG1	F	CARGAGQRSSGDKNYFDLW	in-frame	177	177	0	0	0	0	0	0	0	0	0
IGHV3-23D	F	IGHD6-6	F	IGHJ4	F	IGHG2	F	CTSLPSIAPRPDYW	in-frame	177	0	0	0	0	0	0	0	0	177	0
IGHV3-21	F	x	x	IGHJ6	F	IGHG2	F	CARDSLSYYGMDVW	in-frame	177	0	0	0	0	0	0	0	0	177	0
IGHV3-11	F	x	x	IGHJ4	F	IGHG1	F	CARDPGRGIEWLPDSFDYW	in-frame	177	177	0	0	0	0	0	0	0	0	0
IGHV1-3	F	IGHD6-13	F	IGHJ4	F	IGHG1	F	CARDLDSSSWRDYW	in-frame	177	0	0	0	0	0	0	0	177	0	0
IGHV1-18	F	x	x	IGHJ4	F	IGHG1	F	CARADMFTVTSDFDYW	in-frame	177	0	177	0	0	0	0	0	0	0	0
IGHV4-4	F	x	x	IGHJ3	F	IGHG1	F	CARDRGISSDGLAFDVW	in-frame	176	0	0	176	0	0	0	0	0	0	0
IGHV4-34	F	x	x	IGHJ4	F	IGHG2	F	CARGDQANWAPIDSW	in-frame	176	0	0	0	0	0	0	176	0	0	0
IGHV4-34	F	IGHD3-16	F	IGHJ4	F	IGHG2	F	CARGYDFVWGSEGYW	in-frame	176	0	0	176	0	0	0	0	0	0	0
IGHV4-34	F	IGHD3-10	F	IGHJ5	F	IGHG1	F	CARRGLWFGDLFMWFDPW	in-frame	176	176	0	0	0	0	0	0	0	0	0
IGHV3-9	F	x	x	IGHJ6	F	IGHG1	F	CTKDIKTMTTPHYGMDVW	in-frame	176	0	0	176	0	0	0	0	0	0	0
IGHV3-74	F	x	x	IGHJ4	F	IGHG2	F	CVRDLFGADDYW	in-frame	176	0	0	0	0	0	0	0	0	0	176
IGHV3-23D,IGHV3-23	F	x	x	IGHJ4	F	IGHG1	F	CAKRSSRANYHFDYW	in-frame	176	0	0	0	0	0	0	0	0	176	0
IGHV3-23D	F	IGHD5-12	F	IGHJ3	F	IGHG1	F	CAKGLWYSGYEGGRNDAFDIW	in-frame	176	0	0	0	176	0	0	0	0	0	0
IGHV2-5	F	x	x	IGHJ4	F	IGHG2	F	CAHFSGKWLPVGYW	in-frame	176	0	0	0	0	0	0	0	176	0	0
IGHV1-18,IGHV1-46	F	x	x	IGHJ6	F	IGHG1	F	CARARRRRLYGDDTFWRGGIVEYYGLDVW	in-frame	176	0	0	0	0	0	0	0	0	176	0
IGHV1-18	F	x	x	IGHJ4	F	IGHG1	F	CARVSRSGPNGGFGGVLVPPHLDYW	in-frame	176	176	0	0	0	0	0	0	0	0	0
IGHV7-4-1	F	x	x	IGHJ4	F	IGHG1	F	CARTFCTDTNCWRYFDTW	in-frame	175	0	0	0	0	0	175	0	0	0	0
IGHV6-1	F	IGHD3-10	F	IGHJ6	F	IGHG2	F	CARGLKIGSGSRIGMDVW	in-frame	175	0	0	0	0	0	0	0	175	0	0
IGHV4-34	F	IGHD6-13	F	IGHJ1	F	IGHG3	F	CARPARRAAAGRGDFQHW	in-frame	175	175	0	0	0	0	0	0	0	0	0
IGHV3-NL1	F	x	x	IGHJ4	F	IGHG2	F	CAKEGYTSGRCGAFNYW	in-frame	175	175	0	0	0	0	0	0	0	0	0
IGHV3-9	F	x	x	IGHJ4	F	IGHG2	F	CVADRAGDLEYW	in-frame	175	0	0	0	0	0	0	0	175	0	0
IGHV3-9	F	IGHD3-10	F	IGHJ6	F	IGHG1	F	CAKDKHYSPLWSYNNGMDVW	in-frame	175	0	0	0	0	0	0	0	175	0	0
IGHV3-7	F	x	x	IGHJ4	F	IGHG2	F	CVRTARVLDFW	in-frame	175	0	0	0	0	0	0	0	0	175	0
IGHV3-66	F	x	x	IGHJ4	F	IGHG1	F	CAGSKGTYFDFW	in-frame	175	0	0	0	175	0	0	0	0	0	0
IGHV2-5	F	x	x	IGHJ6	F	IGHG1	F	CAMGTRAYGTARHLDYGMDVW	in-frame	175	0	0	175	0	0	0	0	0	0	0
IGHV1-18	F	x	x	IGHJ6	F	IGHG1	F	CARAPYSFSFFYYYYYMDVW	in-frame	175	0	175	0	0	0	0	0	0	0	0
IGHV1-18	F	x	x	IGHJ5,IGHJ4	F	IGHG3	F	CVKDLRYDSYGYYRVGAPQW	in-frame	175	175	0	0	0	0	0	0	0	0	0
IGHV1-18	F	IGHD2-15	F	IGHJ4	F	IGHG2	F	CARGLDDCSDGSCYSAEYW	in-frame	175	0	0	0	175	0	0	0	0	0	0
IGHV4-61,IGHV4-59	F	x	x	IGHJ4	F	IGHG1	F	CARSSGALHYW	in-frame	174	0	0	174	0	0	0	0	0	0	0
IGHV3-NL1,IGHV3-30-5,IGHV3-30-3,IGHV3-30	F	x	x	IGHJ4	F	IGHG4	F	CAKDKVSWVHGELANW	in-frame	174	0	0	0	174	0	0	0	0	0	0
IGHV3-7	F	IGHD6-13	F	IGHJ4	F	IGHG4	F	CARQTLRAAGTGRYFW	in-frame	174	0	0	0	174	0	0	0	0	0	0
IGHV3-53	F	IGHD3-9	F	IGHJ4	F	IGHG2	F	CAAVLRYFGPFDYW	in-frame	174	0	0	0	0	0	0	0	0	174	0
IGHV3-48	F	x	x	IGHJ4	F	IGHG2	F	CARVGGTGSGFDLW	in-frame	174	0	0	0	0	0	174	0	0	0	0
IGHV3-43	F	x	x	IGHJ4	F	IGHG2	F	CAKERRGTQWTVEEW	in-frame	174	174	0	0	0	0	0	0	0	0	0
IGHV3-43	F	x	x	IGHJ4	F	IGHG1	F	CAKGLGRAFDHW	in-frame	174	0	0	174	0	0	0	0	0	0	0
IGHV3-23D	F	x	x	IGHJ2	F	IGHG2	F	CAKGEGAMLENWFFDFW	in-frame	174	174	0	0	0	0	0	0	0	0	0
IGHV3-23D	F	IGHD3-10	F	IGHJ4	F	IGHG2	F	CAKDGYGSGSYNTLSFDHW	in-frame	174	174	0	0	0	0	0	0	0	0	0
IGHV1-18	F	x	x	IGHJ4	F	IGHG2	F	CARERGGYRHADYW	in-frame	174	0	0	0	0	0	0	0	174	0	0
IGHV4-39	F	x	x	IGHJ6	F	IGHG1	F	CARHLYGMDVW	in-frame	173	0	0	173	0	0	0	0	0	0	0
IGHV3-9	F	x	x	IGHJ4	F	IGHG2	F	CAKDYNWEFDYW	in-frame	173	0	0	173	0	0	0	0	0	0	0
IGHV3-9	F	x	x	IGHJ1	F	IGHG2	F	CAKEGGTGVHGYFQHW	in-frame	173	173	0	0	0	0	0	0	0	0	0
IGHV3-7	F	x	x	IGHJ5,IGHJ4	F	IGHG2	F	CVRDDHYCDW	in-frame	173	0	0	0	0	0	173	0	0	0	0
IGHV3-7	F	x	x	IGHJ4	F	IGHG2	F	CARDGHYADNSPFYPDYW	in-frame	173	0	0	0	173	0	0	0	0	0	0
IGHV3-66	F	IGHD3-10	F	IGHJ6	F	IGHG1	F	CARTMVREIIIVPFDYAMDVW	in-frame	173	0	0	0	173	0	0	0	0	0	0
IGHV3-48,IGHV3-7,IGHV3-69-1	F	x	x	IGHJ6	F	IGHG1	F	CARERLGYYYFYMDVW	in-frame	173	0	0	0	0	173	0	0	0	0	0
IGHV3-48	F	IGHD3-10	F	IGHJ5,IGHJ4	F	IGHG2	F	CVSSLVEGTVAW	in-frame	173	0	0	0	0	0	0	0	0	173	0
IGHV2-5	F	x	x	IGHJ4	F	IGHG2	F	CAQRPVIAPNYFEYW	in-frame	173	0	173	0	0	0	0	0	0	0	0
IGHV1-18	F	x	x	IGHJ5	F	IGHG2	F	CANLPVGSVGSW	in-frame	173	0	173	0	0	0	0	0	0	0	0
IGHV7-4-1	F	x	x	IGHJ4	F	IGHG3	F	CAREGSSSWHHVARDYW	in-frame	172	0	0	0	0	0	0	0	172	0	0
IGHV5-51	F	x	x	IGHJ2	F	IGHG1	F	CGLVVTVSGHFDLW	in-frame	172	0	0	172	0	0	0	0	0	0	0
IGHV4-61,IGHV4-59	F	x	x	IGHJ5	F	IGHG2	F	CARNPNYGDPPWVWFDPW	in-frame	172	0	0	0	0	0	0	0	172	0	0
IGHV4-61	F	x	x	IGHJ2	F	IGHG2	F	CARVGVRSGGWFFDLW	in-frame	172	172	0	0	0	0	0	0	0	0	0
IGHV4-59	F	IGHD5-12	F	IGHJ4	F	IGHG2	F	CAKRGYSGYDSGYFDYW	in-frame	172	0	0	172	0	0	0	0	0	0	0
IGHV4-59	F	IGHD3-9	F	IGHJ6	F	IGHG1	F	CARGDYDALTGYFDNGMDVW	in-frame	172	0	0	0	0	0	172	0	0	0	0
IGHV4-30-4	F	x	x	IGHJ3	F	IGHG1	F	CARGGSTRGRGAFDIW	in-frame	172	172	0	0	0	0	0	0	0	0	0
IGHV3-9	F	x	x	IGHJ6	F	IGHG1	F	CAKDRLAYYYYGMDVW	in-frame	172	0	0	172	0	0	0	0	0	0	0
IGHV3-74	F	x	x	IGHJ5	F	IGHG2	F	CARGFFDNGDFYRPSAFDPW	in-frame	172	172	0	0	0	0	0	0	0	0	0
IGHV3-23D	F	x	x	IGHJ4	F	IGHG2	F	CSTHGSTGTIYYFGNW	in-frame	172	0	0	0	0	0	0	0	0	172	0
IGHV2-5	F	x	x	IGHJ4	F	IGHG1	F	CVYSQDVLRYFDAFYW	in-frame	172	0	0	0	0	0	0	0	172	0	0
IGHV2-5	F	x	x	IGHJ3	F	IGHG1	F	CAHRQGGGSSGSNGDGFDIW	in-frame	172	0	0	172	0	0	0	0	0	0	0
IGHV1-18	F	IGHD6-13	F	IGHJ4	F	IGHG1	F	CARDGSHYSSNWLEYNFDSW	in-frame	172	172	0	0	0	0	0	0	0	0	0
IGHV7-4-1	F	x	x	IGHJ4	F	IGHG1	F	CARGARQLVLPDNW	in-frame	171	0	0	0	0	0	0	0	171	0	0
IGHV4/OR15-8,IGHV4-61,IGHV4-4	ORF	x	x	IGHJ5	F	IGHG1	F	CASLNPFGFGDPAGFDPW	in-frame	171	0	0	0	0	0	171	0	0	0	0
IGHV4-39	F	x	x	IGHJ5	F	IGHG1	F	CARQCRGGLSVTDGIGANWFDPW	in-frame	171	0	0	0	0	0	0	171	0	0	0
IGHV4-39	F	x	x	IGHJ4	F	IGHG2	F	CANIFPADYW	in-frame	171	0	0	171	0	0	0	0	0	0	0
IGHV4-39	F	IGHD6-19	F	IGHJ2	F	IGHG1	F	CARHHVAVAGPPRWCWYFDLW	in-frame	171	171	0	0	0	0	0	0	0	0	0
IGHV3-NL1,IGHV3-30-5,IGHV3-30-3,IGHV3-30	F	x	x	IGHJ6	F	IGHG1	F	CAKDIRKGSDWYELSNELYYYYYGMDLW	in-frame	171	0	0	0	171	0	0	0	0	0	0
IGHV3-7,IGHV3-69-1,IGHV3-48,IGHV3-21	F	x	x	IGHJ3	F	IGHG1	F	CARDKGADFLIDGDAFDVW	in-frame	171	0	0	0	171	0	0	0	0	0	0
IGHV3-7,IGHV3-69-1	F	IGHD5-12	F	IGHJ3	F	IGHG1	F	CARANSGYERDAFDVW	in-frame	171	0	0	0	0	0	171	0	0	0	0
IGHV3-7	F	x	x	IGHJ5,IGHJ4	F	IGHG2	F	CARGRWSLDW	in-frame	171	171	0	0	0	0	0	0	0	0	0
IGHV3-15	F	x	x	IGHJ4	F	IGHG2	F	CTTIALNLGPAYDGVFNYW	in-frame	171	0	0	0	0	0	0	171	0	0	0
IGHV3-11	F	x	x	IGHJ6	F	IGHG2	F	CARNFYSWGAGSNAMDVW	in-frame	171	171	0	0	0	0	0	0	0	0	0
IGHV1-18	F	IGHD1-26	F	IGHJ6	F	IGHG2	F	CARVRSGSYYYYYGMDVW	in-frame	171	0	0	171	0	0	0	0	0	0	0
IGHV7-4-1	F	IGHD2-15	F	IGHJ6	F	IGHG1	F	CARSDCSGGSCYSYYYYYGMDVW	in-frame	170	0	0	170	0	0	0	0	0	0	0
IGHV4-59	F	IGHD3-9	F	IGHJ4	F	IGHG2	F	CARHSYDILTGYYPEYYFDYW	in-frame	170	0	0	170	0	0	0	0	0	0	0
IGHV4-39	F	x	x	IGHJ4	F	IGHG2	F	CARVPEQFVPPYFDYW	in-frame	170	0	0	0	0	0	0	0	0	170	0
IGHV4-34	F	x	x	IGHJ5,IGHJ4	F	IGHG1	F	CATRRTGW	in-frame	170	0	0	170	0	0	0	0	0	0	0
IGHV3-7	F	x	x	IGHJ6	F	IGHG1	F	CARYRGSSYHMDVW	in-frame	170	0	0	0	0	0	170	0	0	0	0
IGHV3-49	F	x	x	IGHJ3	F	IGHG2	F	CSRDTKGGLGRTDAFDIW	in-frame	170	0	0	0	170	0	0	0	0	0	0
IGHV3-33	F	x	x	IGHJ4	F	IGHG2	F	CARRQSGDGYLIDYW	in-frame	170	0	0	0	0	0	0	0	0	0	170
IGHV2-26	F	IGHD1-26	F	IGHJ4	F	IGHG1	F	CARIPPVSGSYADYW	in-frame	170	0	0	0	0	0	0	0	0	0	170
IGHV1-18	F	IGHD3-10	F	IGHJ6	F	IGHG2	F	CARIGYYYYGSGSYYYYYYYMDVW	in-frame	170	0	0	0	0	0	170	0	0	0	0
IGHV4-61	F	x	x	IGHJ4,IGHJ1	F	IGHG2	F	CARELPADGHVQHW	in-frame	169	169	0	0	0	0	0	0	0	0	0
IGHV4-39	F	x	x	IGHJ4	F	IGHG2	F	CARRPSNGRYTFDQW	in-frame	169	0	0	0	0	0	169	0	0	0	0
IGHV4-39	F	IGHD3-22	F	IGHJ6	F	IGHG1	F	CARHNQRLYDSGGYYYYYGMDVW	in-frame	169	169	0	0	0	0	0	0	0	0	0
IGHV4-30-4	F	x	x	IGHJ5	F	IGHG2	F	CARGRRDLLVVAYFDSW	in-frame	169	0	169	0	0	0	0	0	0	0	0
IGHV3-NL1,IGHV3-30-5,IGHV3-30-3,IGHV3-30	F	IGHD3-3	F	IGHJ6	F	IGHG1	F	CAKDRDFWSGETDGMDVW	in-frame	169	0	0	0	0	0	0	0	0	169	0
IGHV3-9	F	IGHD6-19	F	IGHJ4	F	IGHG1	F	CVKDMTKFGSGWPRFPFEFW	in-frame	169	0	0	169	0	0	0	0	0	0	0
IGHV3-7	F	x	x	IGHJ5,IGHJ4	F	IGHG2	F	CVKGGWELSEW	in-frame	169	0	0	0	169	0	0	0	0	0	0
IGHV3-7	F	x	x	IGHJ4,IGHJ1	F	IGHG2	F	CASSRFLAYW	in-frame	169	0	0	0	0	0	0	169	0	0	0
IGHV3-66	F	x	x	IGHJ4	F	IGHG1	F	CARDNSAHRTYYFDSW	in-frame	169	0	0	169	0	0	0	0	0	0	0
IGHV3-23D	F	x	x	IGHJ5	F	IGHG2	F	CAKAYPGPIGGDTMNSW	in-frame	169	0	0	0	0	0	0	0	0	0	169
IGHV3-23D	F	IGHD6-19	F	IGHJ6	F	IGHG4	F	CAKDSSGWYLGVNYYYYGMDVW	in-frame	169	0	0	0	169	0	0	0	0	0	0
IGHV1-46	F	x	x	IGHJ3	F	IGHG2	F	CARDDSHWAFDIW	in-frame	169	0	0	0	0	0	0	0	0	169	0
IGHV1-18	F	x	x	IGHJ4	F	IGHG1	F	CARVVGRTLDYW	in-frame	169	0	169	0	0	0	0	0	0	0	0
IGHV1-18	F	x	x	IGHJ3	F	IGHG2	F	CAKDPMHARNWFRAGPAFDVW	in-frame	169	0	0	0	0	0	0	0	0	0	169
IGHV4-34,IGHV4-31	F	x	x	IGHJ5	F	IGHG2	F	CARGVMFYNWFDPW	in-frame	168	0	0	0	0	0	0	0	0	168	0
IGHV4-34,IGHV4-31	F	x	x	IGHJ3	F	IGHG2	F	CAREVKTAVASDAFDVW	in-frame	168	0	0	168	0	0	0	0	0	0	0
IGHV4-34,IGHV4-31	F	IGHD3-10	F	IGHJ3	F	IGHG1	F	CARRVMVRVDAFDVW	in-frame	168	0	0	0	0	0	0	0	0	168	0
IGHV3-9	F	x	x	IGHJ4	F	IGHG1	F	CAKEPHELAISALDYW	in-frame	168	0	0	0	0	0	0	0	168	0	0
IGHV3-23D	F	IGHD3-10	F	IGHJ4	F	IGHG1	F	CAKDRSRSGSGSYYTDFDYW	in-frame	168	0	0	0	168	0	0	0	0	0	0
IGHV1-3	F	IGHD3-22	F	IGHJ6	F	IGHG1	F	CAREPYDSSGYYYPSRMDVW	in-frame	168	0	0	0	0	0	0	0	168	0	0
IGHV1-18	F	IGHD6-13	F	IGHJ4	F	IGHG2	F	CARDLGQSSSWPDYW	in-frame	168	0	0	0	0	0	0	0	168	0	0
IGHV7-4-1	F	IGHD3-22	F	IGHJ6	F	IGHG1	F	CAKIGNYYDNSGYEQVYYYYYGIDVW	in-frame	167	0	0	0	0	0	0	167	0	0	0
IGHV4-61,IGHV4-59,IGHV4-4,IGHV4-39	F	IGHD5-5,IGHD3-10	F	IGHJ4	F	IGHG1	F	CARSPGRGDNYGSIYFDSW	in-frame	167	0	0	0	0	0	0	0	0	167	0
IGHV4-4,IGHV4-61,IGHV4-59	F	x	x	IGHJ5	F	IGHG1	F	CARDDVGYYYHWIDPW	in-frame	167	0	0	0	0	0	0	0	0	167	0
IGHV4-39	F	x	x	IGHJ4	F	IGHG2	F	CVRDFTSISASDYW	in-frame	167	0	0	0	0	0	0	0	0	167	0
IGHV4-39	F	x	x	IGHJ4	F	IGHG1	F	CARSDRDCTSTDCYWDQTKLDESFFDYW	in-frame	167	0	0	0	0	167	0	0	0	0	0
IGHV3-9	F	x	x	IGHJ3	F	IGHG2	F	CTRGLQWLEAFDVW	in-frame	167	0	0	167	0	0	0	0	0	0	0
IGHV3-9	F	IGHD3-22	F	IGHJ5	F	IGHG2	F	CAKAYYYDSSGYYTGLGYW	in-frame	167	0	0	167	0	0	0	0	0	0	0
IGHV3-74	F	IGHD3-22	F	IGHJ4	F	IGHG1	F	CAKDQGGGYYDTLDYW	in-frame	167	0	0	0	0	0	167	0	0	0	0
IGHV3-48	F	x	x	IGHJ3	F	IGHG2	F	CARGWRDNSFDVW	in-frame	167	0	0	0	0	167	0	0	0	0	0
IGHV3-23D	F	x	x	IGHJ4	F	IGHG2	F	CVKDVQVGAARPEYW	in-frame	167	167	0	0	0	0	0	0	0	0	0
IGHV3-23D	F	x	x	IGHJ4	F	IGHG2	F	CAKARWDSGKYNNEFGNW	in-frame	167	0	0	0	0	0	0	0	0	167	0
IGHV4-61,IGHV4-34,IGHV4-31	ORF	x	x	IGHJ3	F	IGHG2	F	CARRRCGPNIDYCGQDPFDIW	in-frame	166	0	0	0	0	0	0	0	166	0	0
IGHV4-59	F	x	x	IGHJ6	F	IGHG2	F	CARHGCSGVNCRVYYMDVW	in-frame	166	0	0	0	0	0	0	0	166	0	0
IGHV4-59	F	x	x	IGHJ1	F	IGHG3	F	CARGYTNTWTEYFQHW	in-frame	166	0	0	166	0	0	0	0	0	0	0
IGHV4-39	F	x	x	IGHJ4	F	IGHG2	F	CARHAGASLTRLPDYW	in-frame	166	0	0	0	0	0	0	0	166	0	0
IGHV4-39	F	IGHD1-26	F	IGHJ4	F	IGHG2	F	CASHSGSFPAGYFDSW	in-frame	166	0	0	0	0	0	0	166	0	0	0
IGHV3-9	F	IGHD3-10	F	IGHJ3	F	IGHG1	F	CARDIDGYYGSGTYSNDAFDIW	in-frame	166	0	0	166	0	0	0	0	0	0	0
IGHV3-7	F	x	x	IGHJ5	F	IGHG2	F	CVRGRIIFGPW	in-frame	166	0	0	0	0	0	0	166	0	0	0
IGHV3-7	F	IGHD3-22	F	IGHJ6	F	IGHG1	F	CARDFGYYYYYGMDVW	in-frame	166	166	0	0	0	0	0	0	0	0	0
IGHV3-23D	F	IGHD3-22	F	IGHJ4	F	IGHG2	F	CAKVRISMIVGVIHYFDYW	in-frame	166	0	0	0	166	0	0	0	0	0	0
IGHV2-70D,IGHV2-70	F	IGHD6-19	F	IGHJ4	F	IGHG2	F	CAREIEKQWLGGNFDYW	in-frame	166	0	0	0	0	0	0	0	0	0	166
IGHV5-51	F	x	x	IGHJ5	F	IGHG1	F	CARQPRPDISGYENWFDSW	in-frame	165	165	0	0	0	0	0	0	0	0	0
IGHV4/OR15-8,IGHV4-61,IGHV4-4	ORF	x	x	IGHJ4	F	IGHG2	F	CARHIGVSGTRGFDYW	in-frame	165	0	0	0	0	0	0	0	165	0	0
IGHV4/OR15-8	ORF	x	x	IGHJ4	F	IGHG1	F	CAKLLGGRVEYW	in-frame	165	0	0	0	0	0	0	0	0	165	0
IGHV4-61	F	IGHD2-21	F	IGHJ6	F	IGHG2	F	CASHLGWGGGDRYYYYYYMDVW	in-frame	165	0	0	0	0	0	165	0	0	0	0
IGHV4-34	F	IGHD6-13	F	IGHJ4	F	IGHG1	F	CAREVAAADIYYFDYW	in-frame	165	0	0	0	0	0	165	0	0	0	0
IGHV4-30-4	F	x	x	IGHJ3	F	IGHG1	F	CATYPQLLSAFDIW	in-frame	165	0	165	0	0	0	0	0	0	0	0
IGHV3-72	F	x	x	IGHJ4	F	IGHG2	F	CARDRRGSYFDYW	in-frame	165	0	0	165	0	0	0	0	0	0	0
IGHV3-69-1,IGHV3-48	P	x	x	IGHJ4	F	IGHG2	F	CARGGGSGSSYSVGPGDFW	in-frame	165	0	0	0	165	0	0	0	0	0	0
IGHV3-23D	F	x	x	IGHJ4	F	IGHG1	F	CAQGPQWLRFPYYFDQW	in-frame	165	0	0	0	0	0	0	165	0	0	0
IGHV3-15	F	IGHD3-3	F	IGHJ3	F	IGHG1	F	CTTLRFLEWLLWSAFDIW	in-frame	165	0	165	0	0	0	0	0	0	0	0
IGHV1-69D	F	x	x	IGHJ3	F	IGHG1	F	CAKISKVGNYYNAFDIW	in-frame	165	0	0	0	0	0	0	0	0	0	165
IGHV1-69	F	x	x	IGHJ6	F	IGHG1	F	CSRDRFSDGEPYYYYFGMDVW	in-frame	165	0	0	165	0	0	0	0	0	0	0
IGHV1-18	F	x	x	IGHJ6	F	IGHG1	F	CAKEGGSSLWGQSFDSYMDVW	in-frame	165	0	0	0	0	165	0	0	0	0	0
IGHV1-18	F	x	x	IGHJ3	F	IGHG2	F	CARDLIYYDLSDLEQWDDTFDIW	in-frame	165	0	0	0	0	0	0	0	165	0	0
IGHV1-18	F	IGHD4-23	ORF	IGHJ3	F	IGHG1	F	CAREGADDYGGDPGHFASDVW	in-frame	165	0	0	0	0	0	0	0	165	0	0
IGHV5-51	F	x	x	IGHJ5	F	IGHG1	F	CVRGLSYYFDHTGYSLFDPW	in-frame	164	0	0	0	0	0	0	0	0	164	0
IGHV4-39	F	IGHD1-26	F	IGHJ4	F	IGHG1	F	CASHSGSFPAGYFDYW	in-frame	164	0	0	0	0	0	0	164	0	0	0
IGHV3-9	F	x	x	IGHJ4	F	IGHG1	F	CIKESRPGGADHW	in-frame	164	0	0	0	0	164	0	0	0	0	0
IGHV3-9	F	IGHD4-23	ORF	IGHJ3	F	IGHG1	F	CTKDMMTTVETPHVFNMW	in-frame	164	0	0	0	0	0	0	0	164	0	0
IGHV3-7	F	x	x	IGHJ4	F	IGHG2	F	CVRDTDYW	in-frame	164	0	0	0	0	0	0	0	0	0	164
IGHV3-11	F	x	x	IGHJ4	F	IGHG2	F	CAKTARLLDYW	in-frame	164	0	0	0	0	0	0	0	0	164	0
IGHV1-18	F	x	x	IGHJ5	F	IGHG2	F	CARGPTTGLNWFDPW	in-frame	164	0	0	0	164	0	0	0	0	0	0
IGHV4-59	F	IGHD3-9	F	IGHJ4	F	IGHG2	F	CARLTDILTGYYDGGSFDYW	in-frame	163	0	0	163	0	0	0	0	0	0	0
IGHV4-39	F	x	x	IGHJ5	F	IGHG3	F	CARMTGSFGAGWFDPW	in-frame	163	0	0	0	0	0	0	163	0	0	0
IGHV4-39	F	x	x	IGHJ4	F	IGHG4	F	CASNLTRHCSDSSCTMLGRYFDSW	in-frame	163	0	0	0	0	0	163	0	0	0	0
IGHV4-39	F	IGHD6-19	F	IGHJ5	F	IGHG1	F	CVRDGSGWYEGWFDSW	in-frame	163	0	0	0	163	0	0	0	0	0	0
IGHV4-38-2	F	x	x	IGHJ5	F	IGHG2	F	CARDFTGTRLDPW	in-frame	163	0	0	0	163	0	0	0	0	0	0
IGHV3-7	F	x	x	IGHJ5	F	IGHG2	F	CAGDPAQYLRSGWFDPW	in-frame	163	0	0	0	0	163	0	0	0	0	0
IGHV3-48	F	x	x	IGHJ4	F	IGHG2	F	CARDGGWKNDYW	in-frame	163	163	0	0	0	0	0	0	0	0	0
IGHV3-23D	F	x	x	IGHJ6	F	IGHG1	F	CAKALTHYHYYGMDVW	in-frame	163	163	0	0	0	0	0	0	0	0	0
IGHV3-23D	F	IGHD6-19	F	IGHJ4	F	IGHG2	F	CAKAVGRGAGWQWLAQFEYW	in-frame	163	163	0	0	0	0	0	0	0	0	0
IGHV1-3	F	x	x	IGHJ4	F	IGHG2	F	CVRRGDGAKYDYW	in-frame	163	0	0	0	0	0	0	0	163	0	0
IGHV1-18	F	x	x	IGHJ4	F	IGHG1	F	CGRDARDSDYNPVTDYW	in-frame	163	0	1	0	0	0	0	162	0	0	0
IGHV1-18	F	IGHD2-15	F	IGHJ5	F	IGHG2	F	CARSARGGSCDKCFDIW	in-frame	163	163	0	0	0	0	0	0	0	0	0
IGHV7-4-1	F	x	x	IGHJ4	F	IGHG2	F	CARVRSPEKAAALYW	in-frame	162	162	0	0	0	0	0	0	0	0	0
IGHV5-51	F	x	x	IGHJ3	F	IGHG2	F	CARPLMRDEDDAFGIW	in-frame	162	0	0	0	0	162	0	0	0	0	0
IGHV4-61	F	IGHD6-19	F	IGHJ3	F	IGHG1	F	CARRGSGWSGDPWPFDIW	in-frame	162	0	0	0	0	0	0	0	0	162	0
IGHV4-59	F	IGHD3-22	F	IGHJ3	F	IGHG1	F	CARPQGAYYDSSGYRIDAFDIW	in-frame	162	0	0	162	0	0	0	0	0	0	0
IGHV4-39	F	IGHD4-17	F	IGHJ3	F	IGHG4	F	CARQVRHGDYVDAFDFW	in-frame	162	0	0	0	0	0	162	0	0	0	0
IGHV4-39	F	IGHD3-22	F	IGHJ3	F	IGHG1	F	CAGDADSSGRRRAPQAFDLW	in-frame	162	0	0	0	0	0	0	0	0	162	0
IGHV3-NL1,IGHV3-30-5,IGHV3-30-3,IGHV3-30	F	x	x	IGHJ4	F	IGHG2	F	CAKDGSGGFTENYYLDYW	in-frame	162	0	0	0	0	0	0	0	0	162	0
IGHV3-9	F	x	x	IGHJ6	F	IGHG1	F	CVKDIRAGYFYYGLDVW	in-frame	162	0	0	162	0	0	0	0	0	0	0
IGHV3-9	F	x	x	IGHJ4	F	IGHG1	F	CAKAAGEWVWDYFDYW	in-frame	162	0	0	162	0	0	0	0	0	0	0
IGHV3-9	F	IGHD5-5,IGHD5-18	F	IGHJ4	F	IGHG1	F	CAKDIEYSYGFDYW	in-frame	162	0	0	162	0	0	0	0	0	0	0
IGHV3-66,IGHV3-30-3,IGHV3-30	F	x	x	IGHJ4	F	IGHG2	F	CARGVGEAGLVNW	in-frame	162	162	0	0	0	0	0	0	0	0	0
IGHV3-33	F	x	x	IGHJ4	F	IGHG2	F	CASEPVAGKDYW	in-frame	162	0	0	0	0	0	162	0	0	0	0
IGHV3-23D	F	x	x	IGHJ6	F	IGHG1	F	CAKVAGDTIAYFHYFYHFIDVW	in-frame	162	0	0	0	0	162	0	0	0	0	0
IGHV3-23D	F	IGHD6-13,IGHD6-19	F	IGHJ5	F	IGHG2	F	CAQEGGRYSSAWYISW	in-frame	162	0	0	0	162	0	0	0	0	0	0
IGHV3-15	F	IGHD5-12	F	IGHJ4	F	IGHG1	F	CTTDLIVATIQAITPDDYW	in-frame	162	0	0	0	0	0	0	0	0	0	162
IGHV2-70,IGHV2-5	F	IGHD3-10	F	IGHJ3	F	IGHG2	F	CAHKRNPVVRGVIPDGFDIW	in-frame	162	162	0	0	0	0	0	0	0	0	0
IGHV1-46	F	x	x	IGHJ3	F	IGHG2	F	CATSLPTSSPAGAIWGDALDTW	in-frame	162	0	0	0	0	0	162	0	0	0	0
IGHV1-24	F	x	x	IGHJ4	F	IGHG1	F	CATFSASSAAHYFDVW	in-frame	162	0	0	0	0	162	0	0	0	0	0
IGHV4/OR15-8,IGHV4-61,IGHV4-4	ORF	x	x	IGHJ4	F	IGHG2	F	CARHQAGTNAFDFW	in-frame	161	0	0	0	0	0	0	0	0	161	0
IGHV4/OR15-8,IGHV4-4,IGHV4-39	ORF	x	x	IGHJ4	F	IGHG2	F	CARGPQNAASFYGYW	in-frame	161	0	0	0	0	0	0	0	0	161	0
IGHV4-61,IGHV4-59	F	x	x	IGHJ3	F	IGHG1	F	CARDYGLTQPNSKGWKVDAFDLW	in-frame	161	0	161	0	0	0	0	0	0	0	0
IGHV4-61	F	x	x	IGHJ3	F	IGHG2	F	CATADLYNGDPFDAFDIW	in-frame	161	0	0	0	161	0	0	0	0	0	0
IGHV4-59	F	x	x	IGHJ5,IGHJ4	F	IGHG1	F	CARHYRGSPAGSWLW	in-frame	161	0	0	161	0	0	0	0	0	0	0
IGHV4-59	F	x	x	IGHJ4	F	IGHG2	F	CARGRRVGSTTGERLEYW	in-frame	161	0	0	0	0	0	0	161	0	0	0
IGHV4-4	F	IGHD2-2	F	IGHJ4	F	IGHG2	F	CAREDLAIVPAALSNW	in-frame	161	0	0	0	0	0	0	0	0	0	161
IGHV4-34,IGHV4-31	F	IGHD2-8	F	IGHJ4	F	IGHG1	F	CARSPIVLVPAAYYDVW	in-frame	161	0	0	0	0	0	0	0	0	161	0
IGHV3-7	F	x	x	IGHJ4	F	IGHG2	F	CARDIGPNTFDYW	in-frame	161	0	0	161	0	0	0	0	0	0	0
IGHV3-23	F	x	x	IGHJ6	F	IGHG2	F	CARFLFGDLRSGLDVW	in-frame	161	0	0	161	0	0	0	0	0	0	0
IGHV3-15	F	IGHD5-5,IGHD5-18	F	IGHJ4	F	IGHG2	F	CTTGGDEGGYSYGYNYW	in-frame	161	0	0	161	0	0	0	0	0	0	0
IGHV3-11	F	x	x	IGHJ4	F	IGHG2	F	CARLGYGDPEDYW	in-frame	161	0	0	0	161	0	0	0	0	0	0
IGHV1-3	F	x	x	IGHJ3	F	IGHG2	F	CARDDPYMNGWPVYFW	in-frame	161	0	0	161	0	0	0	0	0	0	0
IGHV1-3	F	IGHD6-19	F	IGHJ4	F	IGHG2	F	CAREGGYSSGCNYW	in-frame	161	0	0	161	0	0	0	0	0	0	0
IGHV1-2	F	x	x	IGHJ4	F	IGHG1	F	CARDFAVAGNIAIDYW	in-frame	161	0	0	161	0	0	0	0	0	0	0
IGHV7-4-1	F	IGHD3/OR15-3b,IGHD3/OR15-3a	ORF	IGHJ4	F	IGHG2	F	CARVVDYLDTSGYYTILDSW	in-frame	160	0	0	0	0	0	0	0	160	0	0
IGHV5-51	F	x	x	IGHJ4	F	IGHG1	F	CVKLGGETAMERGYFDYW	in-frame	160	0	0	160	0	0	0	0	0	0	0
IGHV4-61	F	x	x	IGHJ4	F	IGHG1	F	CAGRHTGSYFFDYW	in-frame	160	0	0	0	0	0	160	0	0	0	0
IGHV4-59	F	IGHD3-9	F	IGHJ6	F	IGHG1	F	CTRSLFTIFPVGGRSYYGMDVW	in-frame	160	0	0	160	0	0	0	0	0	0	0
IGHV4-39	F	x	x	IGHJ5	F	IGHG3	F	CARMSGSYGAGWFDPW	in-frame	160	0	0	0	0	0	0	160	0	0	0
IGHV4-34	F	x	x	IGHJ3	F	IGHG1	F	CARTSPYHDAFDIW	in-frame	160	0	0	160	0	0	0	0	0	0	0
IGHV4-30-4,IGHV4-30-2	F	x	x	IGHJ5	F	IGHG1	F	CARAEGYSGVGAFVRWFDPW	in-frame	160	0	0	0	0	0	0	160	0	0	0
IGHV3-73	F	x	x	IGHJ5,IGHJ4	F	IGHG1	F	CTSGLPGI*W	out-of-frame	160	0	0	0	0	0	0	0	0	160	0
IGHV3-7,IGHV3-69-1,IGHV3-48	F	x	x	IGHJ5	F	IGHG2	F	CARGLGASWLYSW	in-frame	160	0	0	0	160	0	0	0	0	0	0
IGHV3-23D	F	IGHD3-16	F	IGHJ4	F	IGHG2	F	CAKSYEFIWGSHRSVFDYW	in-frame	160	0	0	0	0	0	160	0	0	0	0
IGHV3-23	F	IGHD3-22	F	IGHJ3	F	IGHG1	F	CAKWSDYYDSSGYSSFAFDIW	in-frame	160	0	0	0	0	0	160	0	0	0	0
IGHV1-18	F	x	x	IGHJ4	F	IGHG2	F	CARDQGWCSGPNCYFNYW	in-frame	160	0	0	0	160	0	0	0	0	0	0
IGHV1-18	F	x	x	IGHJ3	F	IGHG3	F	CARGRAYDRDGAFDIW	in-frame	160	0	0	0	0	0	0	0	160	0	0
IGHV1-18	F	IGHD6-13	F	IGHJ4	F	IGHG1	F	CARDVYSSSWYSPYFFDYW	in-frame	160	160	0	0	0	0	0	0	0	0	0
IGHV1-18	F	IGHD3-9	F	IGHJ6	F	IGHG1	F	CAREKKPRKYDILTASYYYYYGMDVW	in-frame	160	0	0	160	0	0	0	0	0	0	0
IGHV4-59	F	x	x	IGHJ3	F	IGHG1	F	CARHTPGEGAFDIW	in-frame	159	0	0	159	0	0	0	0	0	0	0
IGHV4-59	F	IGHD3-10	F	IGHJ3	F	IGHG1	F	CARLEHITIVRGVIIGAFDIW	in-frame	159	0	0	159	0	0	0	0	0	0	0
IGHV4-39	F	x	x	IGHJ5	F	IGHG1	F	CTRDVGPGRSGRGFFGSW	in-frame	159	0	0	0	0	0	0	0	0	159	0
IGHV4-39	F	x	x	IGHJ4	F	IGHG2	F	CASHGGSFPAGYLDYW	in-frame	159	0	0	0	0	0	0	159	0	0	0
IGHV4-39	F	x	x	IGHJ4	F	IGHG2	F	CARHVHAGNVPDFFDYW	in-frame	159	0	0	0	159	0	0	0	0	0	0
IGHV3-9	F	x	x	IGHJ5	F	IGHG1	F	CAKASGAAVTYNWFDPW	in-frame	159	0	0	0	0	0	0	0	0	159	0
IGHV7-4-1	F	x	x	IGHJ4	F	IGHG2	F	CATADSAVEDPGFDFW	in-frame	158	0	0	0	0	0	0	0	158	0	0
IGHV4-61	ORF	IGHD2-2	F	IGHJ3	F	IGHG1	F	CARGPYCSSVSCNTFGFDAW	in-frame	158	0	0	0	0	0	0	0	0	158	0
IGHV4-39	F	x	x	IGHJ5	F	IGHG2	F	CAKFWAAGADPW	in-frame	158	0	0	0	0	0	158	0	0	0	0
IGHV4-39	F	x	x	IGHJ2	F	IGHG2	F	CARLWGGSNWYFDLW	in-frame	158	0	0	158	0	0	0	0	0	0	0
IGHV4-34,IGHV4-31	F	IGHD3-22	F	IGHJ4	F	IGHG2	F	CATGGGYYSPFDYW	in-frame	158	158	0	0	0	0	0	0	0	0	0
IGHV4-34	F	x	x	IGHJ2	F	IGHG2	F	CARMELGQHWYFDLW	in-frame	158	0	0	0	0	0	0	158	0	0	0
IGHV3-9	F	IGHD3-10	F	IGHJ5,IGHJ4	F	IGHG2	F	CAKAPYGSGSYLFHW	in-frame	158	0	0	158	0	0	0	0	0	0	0
IGHV3-7,IGHV3-69-1,IGHV3-48,IGHV3-21	F	IGHD2-8	F	IGHJ4	F	IGHG2	F	CARGKCTDGVCLGDYW	in-frame	158	0	0	0	0	0	0	0	0	158	0
IGHV3-69-1,IGHV3-48	P	IGHD2-21	F	IGHJ5	F	IGHG2	F	CARERPNCAGDCLDQW	in-frame	158	0	0	158	0	0	0	0	0	0	0
IGHV3-64D	F	x	x	IGHJ6	F	IGHG2	F	CVKDRSGSTYSGPIYGMDVW	in-frame	158	0	0	0	0	0	0	0	0	0	158
IGHV3-48	F	x	x	IGHJ4	F	IGHG2	F	CARERTTMVEFDYW	in-frame	158	0	0	158	0	0	0	0	0	0	0
IGHV3-33	F	x	x	IGHJ4	F	IGHG1	F	CARDPGHSRVGSMGYFDNW	in-frame	158	0	0	0	0	0	0	0	0	158	0
IGHV3-23D	F	x	x	IGHJ6	F	IGHG1	F	CAKLGFQGYYIHVW	in-frame	158	0	0	0	0	0	0	0	0	158	0
IGHV3-23D	F	IGHD1-26	F	IGHJ6	F	IGHG1	F	CAKEGSGSFYGFDVW	in-frame	158	0	0	0	158	0	0	0	0	0	0
IGHV2-70,IGHV2-5	F	IGHD3-10	F	IGHJ4	F	IGHG1	F	CTHRVTYYSGSGTSEEYYFDYW	in-frame	158	0	0	0	0	0	158	0	0	0	0
IGHV2-5	F	x	x	IGHJ1	F	IGHG2	F	CAHRSDFTGWYRYFQHW	in-frame	158	0	0	158	0	0	0	0	0	0	0
IGHV2-5	F	IGHD5-5,IGHD5-18	F	IGHJ4	F	IGHG1	F	CAHRRGYSSTFDYW	in-frame	158	0	0	0	0	158	0	0	0	0	0
IGHV1-3	F	IGHD3-10	F	IGHJ3	F	IGHG1	F	CARDLSYYASGENDVLDIW	in-frame	158	0	0	158	0	0	0	0	0	0	0
IGHV1-18	F	x	x	IGHJ4	F	IGHG2	F	CARVGAAPGTISRLHDSW	in-frame	158	0	0	158	0	0	0	0	0	0	0
IGHV1-18	F	x	x	IGHJ4	F	IGHG1	F	CARVRRPDFDYW	in-frame	158	0	0	158	0	0	0	0	0	0	0
IGHV4-34,IGHV4-31	F	IGHD6-19	F	IGHJ5	F	IGHG1	F	CARDRSGGHSSGWNWFDPW	in-frame	157	0	0	0	0	0	157	0	0	0	0
IGHV3-NL1,IGHV3-30-5,IGHV3-30-3,IGHV3-30	F	x	x	IGHJ4	F	IGHG2	F	CAKGADWPSSPLRYW	in-frame	157	0	0	0	0	0	0	0	0	157	0
IGHV3-9	F	x	x	IGHJ4	F	IGHG2	F	CAADTRGGADYW	in-frame	157	0	0	0	0	0	0	0	157	0	0
IGHV3-74	F	x	x	IGHJ4	F	IGHG2	F	CARDRWVPQLGSDFFDFW	in-frame	157	157	0	0	0	0	0	0	0	0	0
IGHV3-7,IGHV3-69-1,IGHV3-48	F	x	x	IGHJ5,IGHJ4	F	IGHG4	F	CTRQALRAAGTGRFHW	in-frame	157	0	0	0	157	0	0	0	0	0	0
IGHV3-53	F	x	x	IGHJ4	F	IGHG2	F	CARAIFPGGDFPFNSW	in-frame	157	0	0	0	0	0	0	0	0	157	0
IGHV3-30-3,IGHV3-30	F	x	x	IGHJ3	F	IGHG2	F	CARIGHGFSYGNGLDIW	in-frame	157	0	0	0	0	0	0	157	0	0	0
IGHV3-23D	F	x	x	IGHJ6	F	IGHG1	F	CAKVNDDWYDSRLYNYYYYAMDVW	in-frame	157	157	0	0	0	0	0	0	0	0	0
IGHV3-11	F	x	x	IGHJ6	F	IGHG1	F	CAKDRVPFGMLNSYFGMDVW	in-frame	157	0	0	0	0	0	0	0	0	157	0
IGHV2-5	F	x	x	IGHJ6	F	IGHG2	F	CAQIRGAGTEEDYNYYYYMGVW	in-frame	157	0	0	0	0	0	0	0	157	0	0
IGHV1-2	F	x	x	IGHJ5,IGHJ4	F	IGHG1	F	CARDGGLKGW	in-frame	157	0	0	0	0	0	0	0	0	0	157
IGHV7-4-1	F	IGHD3-9	F	IGHJ6	F	IGHG1	F	CARAGYYDILPYEHYYYYYGMDVW	in-frame	156	0	0	156	0	0	0	0	0	0	0
IGHV5-51	F	x	x	IGHJ4	F	IGHG1	F	CVRHVTAYTTPRDW	in-frame	156	156	0	0	0	0	0	0	0	0	0
IGHV4-61,IGHV4-59	F	x	x	IGHJ2	F	IGHG4	F	CAREEFTTSSIGGYFDLW	in-frame	156	0	0	0	0	0	0	0	156	0	0
IGHV4-30-4	F	x	x	IGHJ5	F	IGHG3	F	CARIPIVAGVFGWFDPW	in-frame	156	0	0	0	1	0	0	0	155	0	0
IGHV3-NL1	F	x	x	IGHJ4	F	IGHG1	F	CAKELGPADYFDYW	in-frame	156	156	0	0	0	0	0	0	0	0	0
IGHV3-74	F	x	x	IGHJ3	F	IGHG2	F	CARDDDRDDNALDIW	in-frame	156	0	0	0	0	0	0	0	156	0	0
IGHV3-74	F	IGHD3-10	F	IGHJ4	F	IGHG1	F	CVGGLLWFGELFYW	in-frame	156	0	0	0	0	0	0	0	0	156	0
IGHV3-73	F	x	x	IGHJ3	F	IGHG1	F	CVGRQDSDTFDMW	in-frame	156	156	0	0	0	0	0	0	0	0	0
IGHV3-7	F	x	x	IGHJ4	F	IGHG1	F	CARAAATDYW	in-frame	156	0	0	0	0	0	0	0	0	156	0
IGHV3-49	F	x	x	IGHJ3	F	IGHG1	F	CTREKWETGGGAFDIW	in-frame	156	0	0	156	0	0	0	0	0	0	0
IGHV3-43	F	x	x	IGHJ3	F	IGHG1	F	CAKEMRGTRWITFDFW	in-frame	156	156	0	0	0	0	0	0	0	0	0
IGHV3-23D	F	x	x	IGHJ4,IGHJ5	F	IGHG2	F	CAKLDGRVISTWACDRW	in-frame	156	0	0	0	0	0	0	0	156	0	0
IGHV3-23D	F	x	x	IGHJ4	F	IGHG2	F	CAKDYPWPSELGIPIFDHW	in-frame	156	0	0	0	0	156	0	0	0	0	0
IGHV3-23D	F	IGHD3-22	F	IGHJ4	F	IGHG2	F	CARGGKSSGYSFDSW	in-frame	156	156	0	0	0	0	0	0	0	0	0
IGHV3-23	F	IGHD3-10	F	IGHJ4	F	IGHG1	F	CSNSAFGELLSNW	in-frame	156	0	0	0	0	0	156	0	0	0	0
IGHV3-15	F	x	x	IGHJ4	F	IGHG1	F	CTPRRGYSNSLDINYW	in-frame	156	156	0	0	0	0	0	0	0	0	0
IGHV3-11	F	x	x	IGHJ4	F	IGHG1	F	CARANNWRGFDYW	in-frame	156	0	0	0	0	0	0	0	0	156	0
IGHV3-11	F	IGHD3-10	F	IGHJ5	F	IGHG2	F	CARDKSGFGEFGNWFDSW	in-frame	156	0	0	0	0	0	0	0	0	156	0
IGHV1-3	F	x	x	IGHJ5,IGHJ4	F	IGHG1	F	CARDRTTVPRSQGLLMW	in-frame	156	0	0	0	0	156	0	0	0	0	0
IGHV5-51	F	x	x	IGHJ6	F	IGHG1	F	CARHFFGATHYYYGMDVW	in-frame	155	0	0	155	0	0	0	0	0	0	0
IGHV4-61	F	IGHD3/OR15-3b,IGHD3/OR15-3a	ORF	IGHJ3	F	IGHG1	F	CAREMGGEGYFGLVAGAFDIW	in-frame	155	0	0	155	0	0	0	0	0	0	0
IGHV4-55	P	x	x	IGHJ6	F	IGHG2	F	CGRAGTSSHPFFSMGPTSFFMDVW	in-frame	155	0	0	0	0	155	0	0	0	0	0
IGHV4-55	P	x	x	IGHJ5	F	IGHG1	F	CATLRVPGWFDPW	in-frame	155	0	0	0	0	0	0	0	0	0	155
IGHV4-34,IGHV4-31	F	IGHD2-21	F	IGHJ4	F	IGHG1	F	CARSAVTAIRGFDYW	in-frame	155	0	0	155	0	0	0	0	0	0	0
IGHV3-7,IGHV3-74	F	x	x	IGHJ4	F	IGHG2	F	CVRLQQGGLSDFW	in-frame	155	0	0	0	0	0	0	0	0	155	0
IGHV3-7	F	x	x	IGHJ5,IGHJ4	F	IGHG1	F	CARGRWLAF*W	out-of-frame	155	0	0	0	0	0	0	0	0	155	0
IGHV3-66	F	x	x	IGHJ5	F	IGHG2	F	CATPGYFSGSWRFDLW	in-frame	155	0	0	155	0	0	0	0	0	0	0
IGHV3-53	F	x	x	IGHJ6	F	IGHG1	F	CTRDRAIPEVGTSYGMDVW	in-frame	155	155	0	0	0	0	0	0	0	0	0
IGHV3-23D	F	x	x	IGHJ4	F	IGHG3	F	CAKDDSANWIYYFDYW	in-frame	155	155	0	0	0	0	0	0	0	0	0
IGHV3-23D	F	x	x	IGHJ4	F	IGHG2	F	CVKQYVRDW	in-frame	155	0	0	0	155	0	0	0	0	0	0
IGHV3-15	F	x	x	IGHJ6	F	IGHG4	F	CTVRPTVIKRDYDYYYMDVW	in-frame	155	0	0	0	0	0	0	0	0	155	0
IGHV3-11	F	IGHD3-10	F	IGHJ4	F	IGHG3	F	CARDGSGSYFYFDYW	in-frame	155	0	0	0	0	0	0	155	0	0	0
IGHV2-5	F	x	x	IGHJ5,IGHJ4	F	IGHG1	F	CVYQFRPTRDALSSRW	in-frame	155	0	0	0	0	155	0	0	0	0	0
IGHV1-69D,IGHV1-69	F	IGHD5-12	F	IGHJ4	F	IGHG1	F	CARVGWSGYDPPFDYW	in-frame	155	155	0	0	0	0	0	0	0	0	0
IGHV1-3	F	x	x	IGHJ4	F	IGHG2	F	CARRGGGNNYDYW	in-frame	155	0	0	0	0	0	0	0	155	0	0
IGHV1-24	F	x	x	IGHJ2	F	IGHG1	F	CTTTSGFPSWYFDLW	in-frame	155	155	0	0	0	0	0	0	0	0	0
IGHV1-18	F	x	x	IGHJ4	F	IGHG2	F	CARGEFPGYGVTSDYW	in-frame	155	0	155	0	0	0	0	0	0	0	0
IGHV4-61	F	x	x	IGHJ4	F	IGHG2	F	CARGEIGWELPYFDYW	in-frame	154	0	0	0	0	0	154	0	0	0	0
IGHV4-61	F	IGHD3-10	F	IGHJ4	F	IGHG1	F	CARHQFGELMKGLDYW	in-frame	154	154	0	0	0	0	0	0	0	0	0
IGHV4-4,IGHV4-39	F	x	x	IGHJ3	F	IGHG2	F	CARDSPWIAGFDVW	in-frame	154	0	0	0	0	0	0	0	0	154	0
IGHV4-4,IGHV4-39	F	IGHD5-24	ORF	IGHJ2	F	IGHG1	F	CARAIRDGYHQTHEPTYWYFDLW	in-frame	154	0	0	0	0	0	0	0	0	154	0
IGHV4-34,IGHV4-59,IGHV4-39	F	x	x	IGHJ4	F	IGHG2	F	CAASPSFVTSDSHRSPLDFW	in-frame	154	0	0	0	154	0	0	0	0	0	0
IGHV3-9	F	x	x	IGHJ6	F	IGHG1	F	CAKDMASGVYYMDVW	in-frame	154	0	0	0	0	154	0	0	0	0	0
IGHV3-74	F	x	x	IGHJ4	F	IGHG2	F	CAGFGLAWGRADW	in-frame	154	0	0	0	0	0	0	0	0	154	0
IGHV3-7,IGHV3-69-1,IGHV3-48	F	x	x	IGHJ5,IGHJ4	F	IGHG1	F	CARELIGRYKASGTLFFW	in-frame	154	0	0	0	0	0	0	0	0	154	0
IGHV3-7	F	x	x	IGHJ4	F	IGHG2	F	CATTRGTDYW	in-frame	154	0	0	0	0	0	0	0	0	154	0
IGHV3-43	F	IGHD5-5,IGHD5-18	F	IGHJ4	F	IGHG1	F	CAKDRRGYTYAFDHW	in-frame	154	0	0	0	0	0	154	0	0	0	0
IGHV3-15	F	x	x	IGHJ6	F	IGHG2	F	CTADLRQKSYYYYMDVW	in-frame	154	0	0	0	0	154	0	0	0	0	0
IGHV3-11	F	x	x	IGHJ4	F	IGHG2	F	CTRGNYGLDYW	in-frame	154	0	0	0	154	0	0	0	0	0	0
IGHV1-69D	F	x	x	IGHJ4	F	IGHG1	F	CTRGTREQLARDSFDYW	in-frame	154	0	0	0	0	0	0	0	0	154	0
IGHV4-59	F	IGHD2-15	F	IGHJ4	F	IGHG1	F	CTRGILGVVVAAPDYW	in-frame	153	0	0	0	0	0	0	0	0	153	0
IGHV4-39	F	x	x	IGHJ4	F	IGHG2	F	CARHRIDRSVNRRHFDFW	in-frame	153	153	0	0	0	0	0	0	0	0	0
IGHV3-9	F	x	x	IGHJ4	F	IGHG2	F	CTKDTTPGGTDYW	in-frame	153	0	0	0	0	0	153	0	0	0	0
IGHV3-23D	F	x	x	IGHJ4	F	IGHG2	F	CAKDLRGPMAGTWYFDYW	in-frame	153	0	0	0	0	0	0	0	153	0	0
IGHV3-15	F	x	x	IGHJ4	F	IGHG2	F	CTRVMQHAVVETNFQYW	in-frame	153	0	0	0	0	0	0	0	153	0	0
IGHV3-15	F	IGHD3-22	F	IGHJ4	F	IGHG2	F	CTTGAQPGTRTSGYLDFW	in-frame	153	0	0	153	0	0	0	0	0	0	0
IGHV1-18	F	x	x	IGHJ4	F	IGHG1	F	CARDRHPLVGAAYFSDFW	in-frame	153	0	0	0	0	0	0	0	153	0	0
IGHV4-61,IGHV4-59	F	x	x	IGHJ6	F	IGHG1	F	CARVSSNMVRAAPRTTYYHYYMDVW	in-frame	152	0	0	0	0	152	0	0	0	0	0
IGHV4-59	F	x	x	IGHJ6	F	IGHG2	F	CARGLGVNWDYYYGMDVW	in-frame	152	0	0	0	0	0	0	0	0	0	152
IGHV4-59	F	x	x	IGHJ4	F	IGHG2	F	CARHGGLYGFNSVDYW	in-frame	152	0	0	0	0	0	0	0	152	0	0
IGHV4-39	F	IGHD3/OR15-3b,IGHD3/OR15-3a	ORF	IGHJ5	F	IGHG1	F	CARYSETTYYDVSTSFGGWFDPW	in-frame	152	0	0	152	0	0	0	0	0	0	0
IGHV3-74	F	x	x	IGHJ5,IGHJ4	F	IGHG2	F	CARDVAGAGSSW	in-frame	152	0	0	152	0	0	0	0	0	0	0
IGHV3-74	F	x	x	IGHJ3	F	IGHG3	F	CARAPGYSSAFDIW	in-frame	152	0	0	0	0	152	0	0	0	0	0
IGHV3-74	F	x	x	IGHJ3	F	IGHG2	F	CARDDARDDNAFDLW	in-frame	152	0	0	0	0	0	0	0	152	0	0
IGHV3-7	F	x	x	IGHJ5,IGHJ4	F	IGHG2	F	CTRDPLVW	in-frame	152	0	0	0	0	0	152	0	0	0	0
IGHV3-64	F	IGHD1-26	F	IGHJ4	F	IGHG1	F	CAKGLFSGSYYEVIDW	in-frame	152	0	0	0	0	0	152	0	0	0	0
IGHV3-23D	F	x	x	IGHJ6	F	IGHG2	F	CAKVFGFGGADYGMDVW	in-frame	152	0	0	0	0	0	0	152	0	0	0
IGHV3-23D	F	IGHD3-10	F	IGHJ4	F	IGHG2	F	CAKARGSGSHRNYYFDYW	in-frame	152	0	0	0	0	0	0	0	152	0	0
IGHV2-70D,IGHV2-70	F	x	x	IGHJ4	F	IGHG2	F	CARTTTGGDFKFDSW	in-frame	152	0	0	0	0	152	0	0	0	0	0
IGHV2-70,IGHV2-5	F	IGHD3-3	F	IGHJ4	F	IGHG4	F	CAHTKLPMTFGVVMSESGYLDHW	in-frame	152	0	0	0	0	152	0	0	0	0	0
IGHV2-70,IGHV2-5	F	IGHD3-22	F	IGHJ4	F	IGHG1	F	CAHSWSTHYFDSSGYYYGGPFFW	in-frame	152	0	0	0	0	0	0	152	0	0	0
IGHV2-5	F	x	x	IGHJ5	F	IGHG1	F	CAHRPVAGNNWFDPW	in-frame	152	0	0	0	0	0	0	152	0	0	0
IGHV2-26	F	IGHD6-13	F	IGHJ6	F	IGHG2	F	CARIREAAGTSYYYGMDVW	in-frame	152	0	0	152	0	0	0	0	0	0	0
IGHV1-69	F	IGHD6-19	F	IGHJ6	F	IGHG2	F	CARVGGSGWSYGMDVW	in-frame	152	0	0	152	0	0	0	0	0	0	0
IGHV7-4-1	F	x	x	IGHJ4	F	IGHG3	F	CARPTRQCPYSTCFSSFDYW	in-frame	151	151	0	0	0	0	0	0	0	0	0
IGHV5-51	F	IGHD2-2	F	IGHJ6	F	IGHG1	F	CARPRYLCSSTSCTNYGMDVW	in-frame	151	0	0	0	0	0	0	0	0	151	0
IGHV4-61	F	x	x	IGHJ2	F	IGHG1	F	CARTPPSVTSDWYFDLW	in-frame	151	0	151	0	0	0	0	0	0	0	0
IGHV4-59	F	x	x	IGHJ6	F	IGHG1	F	CARGGRGMDVW	in-frame	151	0	0	0	0	0	0	0	0	151	0
IGHV4-39	F	x	x	IGHJ6	F	IGHG2	F	CARYQSLTSGGMDVW	in-frame	151	0	0	151	0	0	0	0	0	0	0
IGHV3-74	F	x	x	IGHJ4,IGHJ5	F	IGHG2	F	CVREDCHVANCDRPNHFDHW	in-frame	151	0	0	0	0	0	0	0	0	151	0
IGHV3-53	F	x	x	IGHJ5	F	IGHG2	F	CAREGKIIGGGWFAPW	in-frame	151	0	0	0	0	0	0	0	0	151	0
IGHV3-53	F	x	x	IGHJ4	F	IGHG2	F	CARGFIGGYYFHHW	in-frame	151	0	0	0	0	0	0	0	0	151	0
IGHV3-30-3,IGHV3-30	F	IGHD5-5,IGHD5-18	F	IGHJ3	F	IGHG2	F	CARIGHGYSYGNGLDIW	in-frame	151	0	0	0	0	0	0	151	0	0	0
IGHV3-30-3	F	IGHD3-22	F	IGHJ4	F	IGHG1	F	CARGYDNSGYYSPLFDLW	in-frame	151	0	0	0	0	0	0	0	0	151	0
IGHV3-23D	F	x	x	IGHJ6	F	IGHG2	F	CAKPMSGSSSWYVWDGLDVW	in-frame	151	0	0	0	0	0	0	0	151	0	0
IGHV3-15	F	IGHD3-10	F	IGHJ4	F	IGHG1	F	CTTIFGSGSPGYW	in-frame	151	0	0	0	0	0	0	151	0	0	0
IGHV3-11	F	x	x	IGHJ6	F	IGHG1	F	CAKDRVPIGMVNSYYGMDVW	in-frame	151	0	0	0	0	0	0	0	0	151	0
IGHV3-11	F	IGHD3-10	F	IGHJ4	F	IGHG1	F	CARVWNIYDGSGRPPDYW	in-frame	151	0	0	0	0	0	151	0	0	0	0
IGHV1-3	F	x	x	IGHJ4	F	IGHG2	F	CVRALCNNAKCYSFDYW	in-frame	151	0	0	0	0	0	0	0	151	0	0
IGHV1-3	F	IGHD6-13	F	IGHJ6	F	IGHG2	F	CARDSVAAPGCYMDVW	in-frame	151	0	0	0	0	0	0	0	0	151	0
IGHV1-3	F	IGHD3-10	F	IGHJ4	F	IGHG2	F	CARKDYYGSGTYHFDYW	in-frame	151	0	0	0	0	0	0	0	151	0	0
IGHV4-39	F	IGHD6-13	F	IGHJ6	F	IGHG1	F	CVRETSSSWVLGGMDVW	in-frame	150	0	0	0	150	0	0	0	0	0	0
IGHV3-NL1,IGHV3-66,IGHV3-33	F	IGHD3-22	F	IGHJ4	F	IGHG2	F	CATDLRQDSSGIMEYW	in-frame	150	0	0	0	0	0	150	0	0	0	0
IGHV3-NL1,IGHV3-30-5,IGHV3-30-3,IGHV3-30	F	x	x	IGHJ4	F	IGHG1	F	CAKDVQNLYFFDYW	in-frame	150	0	0	150	0	0	0	0	0	0	0
IGHV3-73	F	IGHD6-19	F	IGHJ4	F	IGHG1	F	CTSPQAVADRYFDYW	in-frame	150	0	150	0	0	0	0	0	0	0	0
IGHV3-72	F	IGHD3-22	F	IGHJ3	F	IGHG2	F	CARVGDYFDTSGYSLDAIDMW	in-frame	150	0	0	0	0	0	0	0	150	0	0
IGHV3-33	F	x	x	IGHJ4	F	IGHG2	F	CARGHGVGRVYFDSW	in-frame	150	0	0	0	150	0	0	0	0	0	0
IGHV3-23D	F	IGHD5-24	ORF	IGHJ4	F	IGHG1	F	CTKEGRWLQSDYW	in-frame	150	0	0	150	0	0	0	0	0	0	0
IGHV3-15	F	x	x	IGHJ5,IGHJ4	F	IGHG1	F	CTTLGKIVW	in-frame	150	150	0	0	0	0	0	0	0	0	0
IGHV3-15	F	IGHD2-2	F	IGHJ6	F	IGHG2	F	CVWIKRYCLTTSCHGDDSFYYYLDVW	in-frame	150	0	0	0	0	0	0	150	0	0	0
IGHV3-11	F	x	x	IGHJ4	F	IGHG2	F	CARGYYGYDFFDSW	in-frame	150	0	0	0	0	0	0	0	150	0	0
IGHV3-11	F	x	x	IGHJ2	F	IGHG1	F	CTRRRQFDLW	in-frame	150	0	0	0	0	0	0	0	0	150	0
IGHV3-11	F	IGHD6-6	F	IGHJ4	F	IGHG2	F	CASSIAVPPRYW	in-frame	150	0	0	0	0	0	0	0	0	150	0
IGHV5-51	F	IGHD2-15	F	IGHJ4	F	IGHG2	F	CARHRHGYCSGGSCYHPFDYW	in-frame	149	0	0	0	0	149	0	0	0	0	0
IGHV4-61	F	x	x	IGHJ6	F	IGHG2	F	CARERAKVATSGVYYYMDVW	in-frame	149	0	0	0	0	0	0	0	149	0	0
IGHV4-59,IGHV4-39	F	x	x	IGHJ4	F	IGHG2	F	CAASPSYVDSDSYRSPLDFW	in-frame	149	0	0	0	149	0	0	0	0	0	0
IGHV4-34	F	x	x	IGHJ4	F	IGHG1	F	CARGARWAVTQRGRYFDYW	in-frame	149	0	0	0	0	149	0	0	0	0	0
IGHV3-NL1,IGHV3-30-5,IGHV3-30-3,IGHV3-30	F	IGHD5-12	F	IGHJ4	F	IGHG2	F	CAKTPNSGYVFNYFDYW	in-frame	149	0	0	149	0	0	0	0	0	0	0
IGHV3-9	F	x	x	IGHJ4	F	IGHG1	F	CVKDIGDAPLHYFDHW	in-frame	149	0	0	0	0	0	0	0	149	0	0
IGHV3-7,IGHV3-69-1,IGHV3-48	F	x	x	IGHJ3	F	IGHG2	F	CVRDETHGYRAFDLW	in-frame	149	0	0	0	0	0	0	0	149	0	0
IGHV3-7,IGHV3-21,IGHV3-11	F	x	x	IGHJ4	F	IGHG1	F	CARVGARVEARYFDYW	in-frame	149	0	0	0	0	0	0	149	0	0	0
IGHV3-7	F	x	x	IGHJ3	F	IGHG1	F	CVRRGGAFDVW	in-frame	149	0	0	0	0	0	0	0	0	149	0
IGHV3-66	F	x	x	IGHJ4	F	IGHG2	F	CAKGPIVSRRTASFDQW	in-frame	149	0	0	0	0	0	0	0	149	0	0
IGHV3-66	F	x	x	IGHJ4	F	IGHG2	F	CAKGPIVSRKTASFDQW	in-frame	149	0	0	0	0	0	0	0	149	0	0
IGHV3-43D	F	x	x	IGHJ4,IGHJ5	F	IGHG1	F	CAKAQYGYSLYFDSW	in-frame	149	0	0	0	0	0	0	0	0	149	0
IGHV3-43	F	x	x	IGHJ4	F	IGHG2	F	CAKEADYTYPPLIDW	in-frame	149	0	0	0	0	149	0	0	0	0	0
IGHV3-23D	F	x	x	IGHJ4	F	IGHG2	F	CAKLQGRVISDWSCDQW	in-frame	149	0	0	0	0	0	0	0	149	0	0
IGHV3-15	F	x	x	IGHJ5	F	IGHG1	F	CTADQRITGTIDSW	in-frame	149	0	0	0	0	149	0	0	0	0	0
IGHV3-13	F	IGHD4-17	F	IGHJ1	F	IGHG2	F	CARGPRYGDYGSYFQHW	in-frame	149	149	0	0	0	0	0	0	0	0	0
IGHV1-18	F	IGHD6-13	F	IGHJ4	F	IGHG1	F	CASSHSIVAAGTGFDYW	in-frame	149	0	0	0	149	0	0	0	0	0	0
IGHV7-4-1	F	IGHD6-19	F	IGHJ1	F	IGHG1	F	CARDLVNSGWSPGTEYFQHW	in-frame	148	148	0	0	0	0	0	0	0	0	0
IGHV4-61,IGHV4-59	F	IGHD5-12	F	IGHJ4	F	IGHG2	F	CAREPTYSGYFESW	in-frame	148	0	0	0	0	0	0	0	148	0	0
IGHV3-NL1,IGHV3-30-5,IGHV3-30-3,IGHV3-30	F	x	x	IGHJ6	F	IGHG1	F	CAKDMDYAAPGYFLYGMDVW	in-frame	148	0	0	0	0	0	0	0	0	148	0
IGHV3-9	F	x	x	IGHJ6	F	IGHG2	F	CAKDLGYSRGGGMDVW	in-frame	148	0	148	0	0	0	0	0	0	0	0
IGHV3-9	F	x	x	IGHJ6	F	IGHG2	F	CAKAWSRHNSWYYFNTAMDVW	in-frame	148	148	0	0	0	0	0	0	0	0	0
IGHV3-74	F	x	x	IGHJ5	F	IGHG2	F	CAGGIYTTSRFDPW	in-frame	148	0	0	0	0	0	0	0	0	148	0
IGHV3-73	F	x	x	IGHJ4	F	IGHG1	F	CRWGSGPDYDYW	in-frame	148	0	0	0	0	0	148	0	0	0	0
IGHV3-7	F	x	x	IGHJ4	F	IGHG2	F	CARHAGHFTDYVHPYYFDSW	in-frame	148	0	0	0	0	0	0	148	0	0	0
IGHV3-7	F	IGHD1-26	F	IGHJ5	F	IGHG2	F	CARPYSGSHPLRSW	in-frame	148	148	0	0	0	0	0	0	0	0	0
IGHV3-23D	F	x	x	IGHJ4	F	IGHG2	F	CAKGGFDYW	in-frame	148	0	0	0	0	0	0	0	148	0	0
IGHV3-15	F	IGHD3-22	F	IGHJ4	F	IGHG2	F	CTVGLYDSGGVDQW	in-frame	148	0	0	0	0	0	0	0	148	0	0
IGHV2-70D,IGHV2-70	F	x	x	IGHJ4	F	IGHG2	F	CARIEQAAYDYW	in-frame	148	0	0	0	0	0	0	0	0	0	148
IGHV1-69D	F	x	x	IGHJ4	F	IGHG2	F	CARTYIKRCFAYW	in-frame	148	0	0	0	0	148	0	0	0	0	0
IGHV1-46	F	x	x	IGHJ4	F	IGHG1	F	CATGGPTGTPHVYW	in-frame	148	0	0	0	0	0	0	0	0	148	0
IGHV7-4-1	F	x	x	IGHJ4	F	IGHG1	F	CSRVGDYADYTNYW	in-frame	147	147	0	0	0	0	0	0	0	0	0
IGHV4-39	F	x	x	IGHJ4	F	IGHG2	F	CARLRITGNEGRGYFDY*W	out-of-frame	147	0	0	0	0	0	0	0	147	0	0
IGHV4-39	F	x	x	IGHJ4	F	IGHG2	F	CARILWHYDDLIDSW	in-frame	147	0	0	0	0	147	0	0	0	0	0
IGHV4-34	F	IGHD2-8	F	IGHJ5	F	IGHG2	F	CARGGRFCTGDGCHHNWFDPW	in-frame	147	0	147	0	0	0	0	0	0	0	0
IGHV3-9	F	x	x	IGHJ6	F	IGHG2	F	CAKVTRGGSGAYYYYGMDVW	in-frame	147	0	0	0	0	0	0	0	147	0	0
IGHV3-9	F	IGHD4-17	F	IGHJ4	F	IGHG1	F	CAKDDYGDPSLFDYW	in-frame	147	0	147	0	0	0	0	0	0	0	0
IGHV3-74	F	x	x	IGHJ4	F	IGHG2	F	CVRGGDPPDYW	in-frame	147	0	147	0	0	0	0	0	0	0	0
IGHV3-74	F	x	x	IGHJ4	F	IGHG2	F	CSRGPRDWRDVGDYW	in-frame	147	0	0	0	0	0	0	0	0	0	147
IGHV3-69-1	P	x	x	IGHJ5	F	IGHG2	F	CARDVEDTSLDNFFAPW	in-frame	147	0	0	0	0	0	0	0	0	147	0
IGHV3-23D	F	x	x	IGHJ4	F	IGHG1	F	CVNVGSLGRFYW	in-frame	147	0	0	0	0	0	147	0	0	0	0
IGHV3-23D	F	IGHD3-10	F	IGHJ4	F	IGHG2	F	CAKGHILGSYSFDSW	in-frame	147	0	0	0	147	0	0	0	0	0	0
IGHV3-23,IGHV3-33	F	x	x	IGHJ3	F	IGHG2	F	CAKYEGRLSAFDIW	in-frame	147	0	0	0	0	0	147	0	0	0	0
IGHV3-15	F	x	x	IGHJ6	F	IGHG1	F	CTTVSHTYYYYYYMDVW	in-frame	147	0	0	0	0	0	0	147	0	0	0
IGHV3-15	F	x	x	IGHJ4	F	IGHG1	F	CTTSCWRPPCYW	in-frame	147	0	0	0	0	0	0	0	0	147	0
IGHV3-11	F	x	x	IGHJ4	F	IGHG1	F	CARDPRPSGYASPFDYW	in-frame	147	0	0	0	0	0	147	0	0	0	0
IGHV2-5	F	x	x	IGHJ3	F	IGHG1	F	CAHTNGIVGTMAAFDIW	in-frame	147	0	0	147	0	0	0	0	0	0	0
IGHV2-26	F	x	x	IGHJ4	F	IGHG1	F	CARIQFGRSTHYFDYW	in-frame	147	0	0	0	0	0	0	0	0	0	147
IGHV1-18	F	x	x	IGHJ4	F	IGHG2	F	CARHVEAWAKTLLFDFW	in-frame	147	0	0	0	0	0	0	147	0	0	0
IGHV4-61	F	x	x	IGHJ2	F	IGHG1	F	CARPPDRRYWKFDLW	in-frame	146	0	0	0	0	0	146	0	0	0	0
IGHV3/OR16-9	ORF	x	x	IGHJ1	F	IGHG2	F	CVTRDCATSICYGEKYFKYW	in-frame	146	146	0	0	0	0	0	0	0	0	0
IGHV3-9	F	x	x	IGHJ4	F	IGHG1	F	CAKDIGDGALHYFDYW	in-frame	146	0	0	0	0	0	0	0	146	0	0
IGHV3-74	F	x	x	IGHJ6	F	IGHG2	F	CARDRVYALDVW	in-frame	146	0	0	0	146	0	0	0	0	0	0
IGHV3-74	F	x	x	IGHJ4	F	IGHG2	F	CARDRGAGTPFDYW	in-frame	146	0	0	0	0	0	0	0	146	0	0
IGHV3-74	F	x	x	IGHJ3	F	IGHG1	F	CARDQARAFDIW	in-frame	146	0	0	0	0	146	0	0	0	0	0
IGHV3-73	F	IGHD4-23	ORF	IGHJ4	F	IGHG1	F	CTSSTTVVTPTHFDYW	in-frame	146	0	0	0	0	0	146	0	0	0	0
IGHV3-33	F	x	x	IGHJ5	F	IGHG2	F	CVQDGLRKSYGRWFGPW	in-frame	146	0	0	0	0	0	0	0	0	146	0
IGHV3-33	F	x	x	IGHJ4	F	IGHG2	F	CVRGSYGSSGRFDYW	in-frame	146	0	0	0	146	0	0	0	0	0	0
IGHV3-15	F	IGHD2-15	F	IGHJ6	F	IGHG2	F	CTADCDSSGGSCYILGNYYYGMDVW	in-frame	146	0	0	0	0	0	0	0	146	0	0
IGHV2-5,IGHV2-70	F	x	x	IGHJ6	F	IGHG1	F	CARCPFDYFYKEGMDVW	in-frame	146	0	0	146	0	0	0	0	0	0	0
IGHV1-69D,IGHV1-69	F	x	x	IGHJ4	F	IGHG1	F	CARDLGVRTERGDYW	in-frame	146	146	0	0	0	0	0	0	0	0	0
IGHV1-69	F	x	x	IGHJ6	F	IGHG1	F	CARVGRPNDYYYYMDIW	in-frame	146	0	0	0	0	146	0	0	0	0	0
IGHV1-69	F	IGHD6-25	F	IGHJ4	F	IGHG4	F	CATSGRSSGWNAEIYFDFW	in-frame	146	0	0	0	146	0	0	0	0	0	0
IGHV1-3	F	x	x	IGHJ4	F	IGHG1	F	CARNIPRTIHFDYW	in-frame	146	0	0	0	0	0	0	0	0	146	0
IGHV1-24	F	x	x	IGHJ4	F	IGHG2	F	CATSGTYYFLHFW	in-frame	146	146	0	0	0	0	0	0	0	0	0
IGHV1-18	F	x	x	IGHJ4	F	IGHG3	F	CARDAPRIRITFGEIGLDYW	in-frame	146	146	0	0	0	0	0	0	0	0	0
IGHV4-39,IGHV4-61,IGHV4-4	F	x	x	IGHJ4	F	IGHG1	F	CAREGLCGIAACAFDYW	in-frame	145	0	145	0	0	0	0	0	0	0	0
IGHV4-39	F	x	x	IGHJ4	F	IGHG1	F	CAGLPAGGLSARSPDGFW	in-frame	145	0	0	0	0	0	145	0	0	0	0
IGHV4-34,IGHV4-31	F	IGHD3-9	F	IGHJ6	F	IGHG1	F	CARDYDILTGYGMDVW	in-frame	145	0	0	0	0	0	0	0	0	0	145
IGHV4-30-4	F	x	x	IGHJ5	F	IGHG2	F	CARIPIVAAVFGWFDPW	in-frame	145	0	0	0	0	0	0	0	145	0	0
IGHV3-9	F	x	x	IGHJ4	F	IGHG2	F	CVKEPHTYGYSPFFDSW	in-frame	145	0	0	145	0	0	0	0	0	0	0
IGHV3-9	F	IGHD3-10	F	IGHJ6	F	IGHG2	F	CTKEGFGSGNYYYFYYYMDVW	in-frame	145	0	0	0	0	0	0	0	145	0	0
IGHV3-9	F	IGHD3-10	F	IGHJ6	F	IGHG1	F	CAKDGSGSYGMDVW	in-frame	145	0	0	145	0	0	0	0	0	0	0
IGHV3-73	F	x	x	IGHJ4	F	IGHG2	F	CIGHVEWVRPYW	in-frame	145	0	0	0	0	0	0	0	145	0	0
IGHV3-49	F	IGHD2-15	F	IGHJ5	F	IGHG1	F	CSSIDCSGGSCYIEGWFDPW	in-frame	145	0	0	145	0	0	0	0	0	0	0
IGHV2-5	F	x	x	IGHJ5	F	IGHG2	F	CAYRLSANYIIPGRYPDWFGPW	in-frame	145	0	0	0	0	0	0	0	145	0	0
IGHV2-5	F	IGHD2-2	F	IGHJ6	F	IGHG2	F	CAHLVVPAARVYYYYGMDVW	in-frame	145	0	0	145	0	0	0	0	0	0	0
IGHV2-5	F	IGHD1-26	F	IGHJ5	F	IGHG1	F	CGHTNGSYWFVWFDPW	in-frame	145	0	0	145	0	0	0	0	0	0	0
IGHV1-3	F	x	x	IGHJ6	F	IGHG2	F	CARGHYDSSANYRSSGYFLDVW	in-frame	145	0	0	0	0	0	0	0	145	0	0
IGHV1-2	F	x	x	IGHJ6	F	IGHG1	F	CARIMLNNWYSYFALDVW	in-frame	145	0	145	0	0	0	0	0	0	0	0
IGHV5-51	F	IGHD6-19	F	IGHJ4	F	IGHG2	F	CARQRQWLADNW	in-frame	144	0	0	0	0	0	0	0	0	0	144
IGHV5-10-1	F	x	x	IGHJ6	F	IGHG2	F	CARYMSFPGVPGFHYYMDVW	in-frame	144	0	144	0	0	0	0	0	0	0	0
IGHV4-61,IGHV4-59	F	IGHD1-26	F	IGHJ4	F	IGHG2	F	CTRASGRYYGGGDSDFW	in-frame	144	0	0	0	0	0	0	0	144	0	0
IGHV4-61	F	x	x	IGHJ4	F	IGHG1	F	CARRTTFFDYW	in-frame	144	0	0	0	0	144	0	0	0	0	0
IGHV4-59	F	x	x	IGHJ6	F	IGHG2	F	CAKLSPLQYTNPYYYHSMDVW	in-frame	144	0	0	144	0	0	0	0	0	0	0
IGHV4-39	F	IGHD6-13	F	IGHJ5	F	IGHG2	F	CARAPGIAAAGTRW	in-frame	144	144	0	0	0	0	0	0	0	0	0
IGHV3-71	P	x	x	IGHJ4	F	IGHG2	F	CARAAAAWWWTDYW	in-frame	144	0	0	0	0	0	144	0	0	0	0
IGHV3-7	F	x	x	IGHJ4	F	IGHG2	F	CAKAPGNRWPLDYW	in-frame	144	144	0	0	0	0	0	0	0	0	0
IGHV3-30-3	F	x	x	IGHJ4	F	IGHG2	F	CASVGLVKLLRVPIVYW	in-frame	144	144	0	0	0	0	0	0	0	0	0
IGHV3-23D	F	x	x	IGHJ6	F	IGHG2	F	CARRIGYHGSGLMDVW	in-frame	144	0	0	0	0	144	0	0	0	0	0
IGHV3-23D	F	IGHD6-19	F	IGHJ4	F	IGHG2	F	CATGVGRGGGWQWLVQFDYW	in-frame	144	144	0	0	0	0	0	0	0	0	0
IGHV3-23D	F	IGHD3-10	F	IGHJ4	F	IGHG2	F	CASRPDDYFGSGIDFW	in-frame	144	144	0	0	0	0	0	0	0	0	0
IGHV3-15	F	x	x	IGHJ3	F	IGHG2	F	CTTDLGHRPSFAWVGIAFDFW	in-frame	144	0	0	0	0	0	0	144	0	0	0
IGHV1-69D	F	x	x	IGHJ5	F	IGHG2	F	CARGLSGSYKWFDPW	in-frame	144	0	0	0	0	144	0	0	0	0	0
IGHV1-3	F	x	x	IGHJ4	F	IGHG2	F	CARDMYGDNSRVTELVDW	in-frame	144	144	0	0	0	0	0	0	0	0	0
IGHV1-18	F	x	x	IGHJ6	F	IGHG1	F	CARDGEYNFVFSYSGMDVW	in-frame	144	0	0	144	0	0	0	0	0	0	0
IGHV1-18	F	IGHD3-10	F	IGHJ6	F	IGHG3	F	CAREPYSYYGSGSYQGRYYYYGMDVW	in-frame	144	0	0	0	0	0	144	0	0	0	0
IGHV4-59	F	IGHD2-2	F	IGHJ4	F	IGHG1	F	CARHGPDIVPAVFDYW	in-frame	143	0	0	143	0	0	0	0	0	0	0
IGHV4-34	F	x	x	IGHJ6	F	IGHG3	F	CARGILDVW	in-frame	143	0	0	0	0	143	0	0	0	0	0
IGHV3-9	F	x	x	IGHJ4	F	IGHG1	F	CAKASPSVTYIDHW	in-frame	143	0	0	0	0	0	0	143	0	0	0
IGHV3-9	F	IGHD3-22	F	IGHJ6	F	IGHG1	F	CWINLPSHYDSLYMDVW	in-frame	143	0	0	0	0	0	0	0	0	143	0
IGHV3-74	F	x	x	IGHJ3	F	IGHG1	F	CARDGTHGAFDVW	in-frame	143	0	0	0	0	143	0	0	0	0	0
IGHV3-7	F	x	x	IGHJ5,IGHJ4	F	IGHG2	F	CATGHWRDSSGW	in-frame	143	0	0	0	0	0	0	0	0	0	143
IGHV3-49	F	x	x	IGHJ3	F	IGHG2	F	CTNYRDAFGIW	in-frame	143	0	0	0	0	0	0	0	143	0	0
IGHV3-23D	F	IGHD4-17	F	IGHJ6	F	IGHG2	F	CAKSDGDYYYFAMDVW	in-frame	143	0	0	0	0	0	0	0	0	0	143
IGHV3-15	F	IGHD2-21	F	IGHJ4	F	IGHG1	F	CTTLGCGGDCYVNDYW	in-frame	143	0	0	143	0	0	0	0	0	0	0
IGHV2-5	F	x	x	IGHJ4	F	IGHG1	F	CAQSFYRNFVSPDYFDYW	in-frame	143	0	0	0	0	143	0	0	0	0	0
IGHV1-8	F	IGHD6-13	F	IGHJ5	F	IGHG1	F	CARGDDWQQLVVKYLSWFDPW	in-frame	143	143	0	0	0	0	0	0	0	0	0
IGHV1-69D	F	IGHD3-10	F	IGHJ4	F	IGHG2	F	CASNFYFGSEAYYALLYW	in-frame	143	0	0	0	0	0	0	143	0	0	0
IGHV1-46	F	x	x	IGHJ4	F	IGHG1	F	CARDRSTLTTYYFDYW	in-frame	143	0	0	143	0	0	0	0	0	0	0
IGHV1-3	F	x	x	IGHJ3	F	IGHG2	F	CARVVGPMLRAFDIW	in-frame	143	0	0	0	0	0	0	0	0	0	143
IGHV1-24	F	IGHD4-17	F	IGHJ4	F	IGHG1	F	CATTRETTVTEFDYW	in-frame	143	0	0	0	0	0	143	0	0	0	0
IGHV1-2	F	x	x	IGHJ5	F	IGHG2	F	CANWRASIGNKYFDPW	in-frame	143	0	0	143	0	0	0	0	0	0	0
IGHV5-51	F	x	x	IGHJ4	F	IGHG1	F	CARRKEVITSGELDYW	in-frame	142	0	0	0	0	142	0	0	0	0	0
IGHV4-61,IGHV4-59	F	IGHD3-10	F	IGHJ6	F	IGHG1	F	CARDYYGSGTGSRWNYYHGMDVW	in-frame	142	0	0	142	0	0	0	0	0	0	0
IGHV4-61	F	IGHD4-17	F	IGHJ6	F	IGHG2	F	CARVAYGDYGHYYYYYYMDVW	in-frame	142	0	0	0	0	0	142	0	0	0	0
IGHV4-61	F	IGHD3-10	F	IGHJ3	F	IGHG2	F	CARNRPHFYGSGSRGNDACDIW	in-frame	142	0	0	142	0	0	0	0	0	0	0
IGHV4-61	F	IGHD3-10	F	IGHJ3	F	IGHG1	F	CARFGSSGSYYGIHAFDIW	in-frame	142	0	0	142	0	0	0	0	0	0	0
IGHV4-30-4	F	x	x	IGHJ6	F	IGHG1	F	CTGSKSSSWPYYYSGLDVW	in-frame	142	0	0	0	0	0	0	0	142	0	0
IGHV3-9	F	x	x	IGHJ4	F	IGHG1	F	CAKVGSTWPTDYDNW	in-frame	142	0	0	0	0	0	0	0	0	142	0
IGHV3-73	F	x	x	IGHJ6	F	IGHG2	F	CRLATSNMDVW	in-frame	142	0	0	0	142	0	0	0	0	0	0
IGHV3-72	F	IGHD6-13	F	IGHJ4	F	IGHG1	F	CASGKDSSSWSFFDYW	in-frame	142	142	0	0	0	0	0	0	0	0	0
IGHV6-1	F	x	x	IGHJ6	F	IGHG2	F	CVRGTWHYGLDVW	in-frame	141	141	0	0	0	0	0	0	0	0	0
IGHV4-61	F	x	x	IGHJ6	F	IGHG2	F	CARLNEEVLISNFHFRGMDVW	in-frame	141	0	0	141	0	0	0	0	0	0	0
IGHV4-61	F	IGHD6-19	F	IGHJ2	F	IGHG2	F	CARVPFSPSSSDWYWYFDVW	in-frame	141	0	0	141	0	0	0	0	0	0	0
IGHV4-39	F	IGHD3-16	F	IGHJ4	F	IGHG2	F	CARRPAGDYVWGKSRTDFDSW	in-frame	141	0	0	0	141	0	0	0	0	0	0
IGHV4-30-4	F	IGHD3-10	F	IGHJ4	F	IGHG2	F	CARVPVIRGVIDYW	in-frame	141	141	0	0	0	0	0	0	0	0	0
IGHV3-9	F	x	x	IGHJ3	F	IGHG1	F	CAKDKFVQGAFDIW	in-frame	141	0	0	0	0	0	0	0	141	0	0
IGHV3-9	F	IGHD3-22	F	IGHJ3	F	IGHG1	F	CAKDIGNYYDSSGYRAFDIW	in-frame	141	0	0	141	0	0	0	0	0	0	0
IGHV3-74	F	x	x	IGHJ6	F	IGHG2	F	CARDIGYYYMDVW	in-frame	141	0	0	0	0	141	0	0	0	0	0
IGHV3-72	F	IGHD1-26	F	IGHJ5,IGHJ4	F	IGHG2	F	CSRLWVVGATVGLDHW	in-frame	141	0	0	141	0	0	0	0	0	0	0
IGHV3-48	F	x	x	IGHJ5	F	IGHG1	F	CARAGGSGVANWFDPW	in-frame	141	0	0	0	0	0	0	0	0	141	0
IGHV3-48	F	x	x	IGHJ4	F	IGHG2	F	CAKDLWEHHPLPQPFDYW	in-frame	141	0	0	141	0	0	0	0	0	0	0
IGHV3-43	F	x	x	IGHJ4	F	IGHG1	F	CANHGSSVAFESW	in-frame	141	0	0	0	0	0	0	0	141	0	0
IGHV3-23D	F	x	x	IGHJ3	F	IGHG2	F	CAKDAIVGDGEYAVDIW	in-frame	141	0	0	0	0	0	141	0	0	0	0
IGHV3-23D	F	IGHD2-2	F	IGHJ5	F	IGHG2	F	CATSPVPGAINWFDPW	in-frame	141	0	0	0	141	0	0	0	0	0	0
IGHV3-13	F	x	x	IGHJ6	F	IGHG2	F	CLGSRSAWFGQSRGMDVW	in-frame	141	0	0	141	0	0	0	0	0	0	0
IGHV2-5	F	x	x	IGHJ5,IGHJ4	F	IGHG1	F	CAHRPGYGESFFDSW	in-frame	141	0	0	0	0	0	0	0	141	0	0
IGHV1-69	F	x	x	IGHJ6	F	IGHG2	F	CARGVAGADSRPYYYYGMDVW	in-frame	141	0	0	141	0	0	0	0	0	0	0
IGHV4-59	F	IGHD3-22	F	IGHJ4	F	IGHG1	F	CARQRGHLYDSSGYPFDYW	in-frame	140	0	140	0	0	0	0	0	0	0	0
IGHV4-39	F	x	x	IGHJ4	F	IGHG1	F	CARRAAPRAFGAEPYYFDYW	in-frame	140	140	0	0	0	0	0	0	0	0	0
IGHV4-39	F	IGHD3-22	F	IGHJ3	F	IGHG1	F	CARRDYYDSSGYYSNAFDIW	in-frame	140	0	0	140	0	0	0	0	0	0	0
IGHV3-7	F	x	x	IGHJ6	F	IGHG1	F	CAANEYYHYYYYYMDVW	in-frame	140	0	0	0	0	0	0	0	0	140	0
IGHV3-69-1,IGHV3-48	P	x	x	IGHJ4	F	IGHG2	F	CARDSGDSAHCTGERCHHFDYW	in-frame	140	0	0	140	0	0	0	0	0	0	0
IGHV3-53	F	x	x	IGHJ6	F	IGHG1	F	CARVGLAGTGAPAFFYYMDIW	in-frame	140	0	0	0	0	140	0	0	0	0	0
IGHV3-33,IGHV3-NL1	F	x	x	IGHJ5	F	IGHG2	F	CVQDGLRKSYGRWFGPW	in-frame	140	0	0	0	0	0	0	0	0	140	0
IGHV3-30-3,IGHV3-30	F	x	x	IGHJ4	F	IGHG2	F	CARETTTHFELQYW	in-frame	140	0	0	0	0	0	0	0	0	140	0
IGHV3-23D	F	x	x	IGHJ4	F	IGHG1	F	CATVKRNYNYFDYW	in-frame	140	0	140	0	0	0	0	0	0	0	0
IGHV3-23D	F	x	x	IGHJ2	F	IGHG1	F	CARDSGPIPDWYFDLW	in-frame	140	0	0	0	140	0	0	0	0	0	0
IGHV2-70D,IGHV2-70	F	IGHD3-16	F	IGHJ6	F	IGHG1	F	CARISGEQKYDYVGGNFRSTYQYHYMDVW	in-frame	140	0	0	0	0	0	140	0	0	0	0
IGHV2-5	F	x	x	IGHJ2	F	IGHG1	F	CAHTAGRLGIGGRYWHFDLW	in-frame	140	0	0	0	0	0	140	0	0	0	0
IGHV1-69D	F	x	x	IGHJ6	F	IGHG1	F	CATAPPSGSADRHTTYYNMAVW	in-frame	140	0	0	0	0	140	0	0	0	0	0
IGHV1-3	F	IGHD1-26	F	IGHJ4	F	IGHG1	F	CAPELSGSYVFDFW	in-frame	140	0	0	0	0	0	0	140	0	0	0
IGHV1-2	F	x	x	IGHJ4	F	IGHG2	F	CAREGMYSRNYYRACDYW	in-frame	140	0	0	0	0	0	0	0	0	0	140
IGHV4-59	F	IGHD2-8	F	IGHJ5	F	IGHG2	F	CARHAHCTNGACYWFDPW	in-frame	139	0	0	0	0	0	0	0	139	0	0
IGHV4-39	F	x	x	IGHJ5,IGHJ4	F	IGHG2	F	CASPGTVYCVNGVCPSLHW	in-frame	139	0	0	0	0	0	0	0	139	0	0
IGHV4-34,IGHV4-31	F	x	x	IGHJ6	F	IGHG1	F	CAREPPPGTNYGMDVW	in-frame	139	0	0	139	0	0	0	0	0	0	0
IGHV3-NL1,IGHV3-30-5,IGHV3-30-3	F	x	x	IGHJ4	F	IGHG2	F	CATGCSATSCRVFEYW	in-frame	139	0	139	0	0	0	0	0	0	0	0
IGHV3-7,IGHV3-74	F	IGHD5-5,IGHD5-18	F	IGHJ4	F	IGHG2	F	CVRSGPSYAYDFW	in-frame	139	0	0	139	0	0	0	0	0	0	0
IGHV3-7,IGHV3-69-1,IGHV3-48,IGHV3-21	F	x	x	IGHJ3	F	IGHG2	F	CVGSLLRGANPHFEALHLW	in-frame	139	0	0	0	0	0	0	0	139	0	0
IGHV3-7,IGHV3-69-1,IGHV3-48,IGHV3-21	F	x	x	IGHJ3	F	IGHG2	F	CARDRSKVLRAYDVW	in-frame	139	0	0	0	0	0	0	0	139	0	0
IGHV3-69-1,IGHV3-48	P	IGHD6-13	F	IGHJ5	F	IGHG2	F	CARTSPPERSWYVSW	in-frame	139	0	0	0	0	0	139	0	0	0	0
IGHV3-49	F	x	x	IGHJ6	F	IGHG2	F	CTRCPRFNTWVAGMDVW	in-frame	139	0	0	0	139	0	0	0	0	0	0
IGHV3-30-3	F	x	x	IGHJ4	F	IGHG1	F	CARGGCSHVSCSPFDSW	in-frame	139	0	0	0	0	0	0	0	0	139	0
IGHV3-23D	F	x	x	IGHJ4	F	IGHG2	F	CAKVRQTTGPFDYW	in-frame	139	0	0	0	0	139	0	0	0	0	0
IGHV3-23D	F	IGHD3-22	F	IGHJ4	F	IGHG2	F	CVKESTQAGGGGYYYPDYW	in-frame	139	0	0	139	0	0	0	0	0	0	0
IGHV3-15	F	x	x	IGHJ3	F	IGHG2	F	CSTGHDLW	in-frame	139	0	0	139	0	0	0	0	0	0	0
IGHV3-11	F	x	x	IGHJ1,IGHJ4	F	IGHG1	F	CARGEIIYAHW	in-frame	139	0	0	0	0	0	0	0	139	0	0
IGHV1-3	F	x	x	IGHJ5	F	IGHG1	F	CTRSESGSFGFYWFDPW	in-frame	139	0	0	139	0	0	0	0	0	0	0
IGHV1-3	F	IGHD3-10	F	IGHJ4	F	IGHG1	F	CAWGSGSYYNLGDYW	in-frame	139	0	0	0	0	0	0	0	139	0	0
IGHV1-18	F	IGHD6-6	F	IGHJ5	F	IGHG3	F	CARDTSSSSSWSW	in-frame	139	0	0	0	0	139	0	0	0	0	0
IGHV1-18	F	IGHD6-19	F	IGHJ5	F	IGHG1	F	CARDDPHSSGWPDCW	in-frame	139	0	0	0	139	0	0	0	0	0	0
IGHV1-18	F	IGHD3-10	F	IGHJ4	F	IGHG1	F	CARPDYYGSGSYGYW	in-frame	139	0	0	139	0	0	0	0	0	0	0
IGHV5-51	F	x	x	IGHJ3	F	IGHG1	F	CARPSSDPDLEVAGLDDLFDIW	in-frame	138	0	0	0	0	138	0	0	0	0	0
IGHV4-61,IGHV4-59	F	IGHD3-9	F	IGHJ6	F	IGHG1	F	CAREDNYDALTGYYYVGGGMAVW	in-frame	138	138	0	0	0	0	0	0	0	0	0
IGHV3-NL1,IGHV3-30-5,IGHV3-30-3,IGHV3-30	F	x	x	IGHJ4	F	IGHG2	F	CAKDRMTTVPNDVGCW	in-frame	138	138	0	0	0	0	0	0	0	0	0
IGHV3-9	F	IGHD6-19	F	IGHJ5	F	IGHG2	F	CVKDSFRLIAVAAFDHW	in-frame	138	0	0	0	0	0	0	0	138	0	0
IGHV3-9	F	IGHD3-10	F	IGHJ6	F	IGHG1	F	CAKDISGPGFGEPWYYNGMDVW	in-frame	138	0	0	138	0	0	0	0	0	0	0
IGHV3-74	F	x	x	IGHJ3	F	IGHG2	F	CVRSLGAGTFDIW	in-frame	138	0	0	0	0	0	0	0	0	138	0
IGHV3-74	F	IGHD2-8	F	IGHJ3	F	IGHG2	F	CTRSGLCPNGGCPLTFDIW	in-frame	138	0	0	0	0	138	0	0	0	0	0
IGHV3-7	F	x	x	IGHJ4	F	IGHG2	F	CVGTWNYAYW	in-frame	138	0	0	0	0	0	0	138	0	0	0
IGHV3-69-1,IGHV3-48	P	IGHD4-17	F	IGHJ6	F	IGHG1	F	CASKPGALDYGYYYYGMDVW	in-frame	138	0	0	138	0	0	0	0	0	0	0
IGHV3-49	F	x	x	IGHJ4	F	IGHG1	F	CTRDIADSVTGYSFYFASW	in-frame	138	0	138	0	0	0	0	0	0	0	0
IGHV3-49	F	x	x	IGHJ3	F	IGHG2	F	CTRDISPTARGSDIW	in-frame	138	0	0	0	0	0	0	0	138	0	0
IGHV3-30	F	x	x	IGHJ4	F	IGHG2	F	CVRDGGGGYNQVDYW	in-frame	138	138	0	0	0	0	0	0	0	0	0
IGHV2-70D,IGHV2-70	F	IGHD5-12	F	IGHJ5	F	IGHG1	F	CAREEWLRTNYNWFDPW	in-frame	138	0	0	138	0	0	0	0	0	0	0
IGHV1-69D	F	x	x	IGHJ4	F	IGHG1	F	CARAADVNLAPYYFDHW	in-frame	138	0	0	0	0	0	0	138	0	0	0
IGHV1-46	F	IGHD2-2	F	IGHJ4	F	IGHG1	F	CARDRCISSTCYDYFDYW	in-frame	138	138	0	0	0	0	0	0	0	0	0
IGHV1-3	F	x	x	IGHJ3	F	IGHG1	F	CARDLDYGVDLKHLGYAFDIW	in-frame	138	0	0	0	0	0	138	0	0	0	0
IGHV1-18	F	IGHD6-13	F	IGHJ6	F	IGHG1	F	CARDLIAAAVPYYYYAMDVW	in-frame	138	0	0	0	0	0	0	0	0	0	138
IGHV1-18	F	IGHD3-10	F	IGHJ3	F	IGHG1	F	CARDEDTMVREDAFDIW	in-frame	138	0	0	138	0	0	0	0	0	0	0
IGHV4-59,IGHV4-39	F	IGHD4-23	ORF	IGHJ3	F	IGHG2	F	CAQRGASGGNSLGAFDIW	in-frame	137	0	0	0	137	0	0	0	0	0	0
IGHV4-30-2	F	x	x	IGHJ3	F	IGHG1	F	CARRGPFLAFDIW	in-frame	137	0	137	0	0	0	0	0	0	0	0
IGHV3-9	F	x	x	IGHJ5	F	IGHG2	F	CAKGPSIVVAPNAW	in-frame	137	0	0	0	0	0	0	0	137	0	0
IGHV3-9	F	x	x	IGHJ5	F	IGHG1	F	CAKDINLGASRW	in-frame	137	0	0	0	0	137	0	0	0	0	0
IGHV3-74	F	x	x	IGHJ4	F	IGHG2	F	CTRDLSGPVDW	in-frame	137	0	0	0	137	0	0	0	0	0	0
IGHV3-53	F	x	x	IGHJ4	F	IGHG1	F	CARHASSSPFDYW	in-frame	137	0	0	0	0	0	0	0	0	137	0
IGHV3-33	F	IGHD3-22	F	IGHJ5,IGHJ4	F	IGHG1	F	CAREYHYYDSSGYFPGGSW	in-frame	137	137	0	0	0	0	0	0	0	0	0
IGHV3-23D	F	x	x	IGHJ5	F	IGHG2	F	CAKDGDFGVGYAWAW	in-frame	137	0	0	137	0	0	0	0	0	0	0
IGHV3-23D	F	IGHD3-9	F	IGHJ4	F	IGHG2	F	CAKSENDILTGYWGLFDYW	in-frame	137	0	0	0	0	0	137	0	0	0	0
IGHV2-5	F	x	x	IGHJ4	F	IGHG1	F	CARSSDTYGGVFFAYW	in-frame	137	0	0	0	0	0	0	137	0	0	0
IGHV2-5	F	IGHD3-9	F	IGHJ4	F	IGHG1	F	CAHYYDILTGDVDYW	in-frame	137	0	0	0	0	0	0	0	137	0	0
IGHV1-3	F	x	x	IGHJ4	F	IGHG2	F	CARGIDTTSWITDYW	in-frame	137	0	0	0	0	137	0	0	0	0	0
IGHV4-61	F	x	x	IGHJ4	F	IGHG2	F	CARDTPENAVAASFDYW	in-frame	136	136	0	0	0	0	0	0	0	0	0
IGHV4-39	F	x	x	IGHJ5	F	IGHG4	F	CARNRTGAARRTQPVITATKWFDPW	in-frame	136	0	0	0	0	0	136	0	0	0	0
IGHV3-74	F	x	x	IGHJ4	F	IGHG2	F	CARDVSGGGRYGPDYW	in-frame	136	0	0	0	0	0	0	0	136	0	0
IGHV3-7,IGHV3-69-1,IGHV3-48	F	IGHD6-13	F	IGHJ6	F	IGHG4	F	CAREIQQLVDATRKAYYLDVW	in-frame	136	0	0	0	0	0	0	0	0	136	0
IGHV3-64D	F	x	x	IGHJ4	F	IGHG2	F	CVKDRRGTYSFDYW	in-frame	136	0	0	0	0	0	0	0	0	0	136
IGHV3-23D	F	IGHD4-17	F	IGHJ4	F	IGHG1	F	CAKMTSLYGDYAGFYFDSW	in-frame	136	0	0	0	0	0	0	136	0	0	0
IGHV3-23D	F	IGHD3-10	F	IGHJ6	F	IGHG2	F	CAKRGVITIIRGPSGMDVW	in-frame	136	136	0	0	0	0	0	0	0	0	0
IGHV3-23D	F	IGHD2-2	F	IGHJ6	F	IGHG1	F	CAKVGVVPAARYYYYGMDVW	in-frame	136	136	0	0	0	0	0	0	0	0	0
IGHV3-23D	F	IGHD2-2	F	IGHJ4	F	IGHG2	F	CAKWDSVVEPAAILFDYW	in-frame	136	0	0	0	0	0	0	0	0	136	0
IGHV3-23	F	IGHD6-19	F	IGHJ4	F	IGHG2	F	CAKDRGDSSGWPIFDYW	in-frame	136	0	0	0	0	0	136	0	0	0	0
IGHV2-70	F	x	x	IGHJ5	F	IGHG1	F	CARISTGELMTLAFDSW	in-frame	136	0	0	136	0	0	0	0	0	0	0
IGHV2-5	F	IGHD6-19	F	IGHJ6	F	IGHG1	F	CAHSPPLAVAGISYYYTMDVW	in-frame	136	0	0	136	0	0	0	0	0	0	0
IGHV1-18	F	x	x	IGHJ4	F	IGHG2	F	CARDLEGHISAPPGYW	in-frame	136	0	0	0	0	0	0	136	0	0	0
IGHV6-1	F	x	x	IGHJ4	F	IGHG2	F	CGRDFSYGKTIAYW	in-frame	135	0	0	0	0	0	0	0	135	0	0
IGHV4-61	F	x	x	IGHJ4	F	IGHG1	F	CARERLDLFDFW	in-frame	135	0	0	135	0	0	0	0	0	0	0
IGHV4-61	F	IGHD6-19	F	IGHJ3	F	IGHG1	F	CAREPPQQWLPGYAFDIW	in-frame	135	0	0	0	0	0	135	0	0	0	0
IGHV4-59	F	x	x	IGHJ4	F	IGHG2	F	CAGGLGWLPEYW	in-frame	135	0	0	0	0	0	0	0	135	0	0
IGHV4-39	F	x	x	IGHJ4	F	IGHG3	F	CARHSGSFPAGYFDKW	in-frame	135	0	0	0	0	0	0	135	0	0	0
IGHV3-9	F	x	x	IGHJ4	F	IGHG2	F	CARDIKRDGSTHLYYFDSW	in-frame	135	135	0	0	0	0	0	0	0	0	0
IGHV3-9	F	IGHD1-1	F	IGHJ3	F	IGHG1	F	CAKATYTTTGTSGFNVW	in-frame	135	135	0	0	0	0	0	0	0	0	0
IGHV3-74	F	x	x	IGHJ4	F	IGHG2	F	CARPYFGSNGAYGYW	in-frame	135	0	0	0	0	0	0	0	0	0	135
IGHV3-7	F	x	x	IGHJ4	F	IGHG2	F	CARDPGSSSWDYW	in-frame	135	135	0	0	0	0	0	0	0	0	0
IGHV3-49	F	x	x	IGHJ5,IGHJ4	F	IGHG1	F	CSRGGGTIYVRQDIW	in-frame	135	0	0	0	0	0	0	135	0	0	0
IGHV3-48	F	x	x	IGHJ5	F	IGHG1	F	CVRYIAGNWFDPW	in-frame	135	0	0	0	0	0	0	0	0	135	0
IGHV3-48	F	IGHD4-4,IGHD4-11	F	IGHJ5	F	IGHG1	F	CARGMATVTNNWFDPW	in-frame	135	0	0	0	0	0	0	0	0	135	0
IGHV2-5	F	x	x	IGHJ4	F	IGHG1	F	CAHSARWLAFDYW	in-frame	135	0	0	0	0	0	0	0	0	0	135
IGHV7-4-1	F	x	x	IGHJ4	F	IGHG2	F	CVRDRYSDTTGSVLDCW	in-frame	134	0	0	0	0	0	0	0	134	0	0
IGHV5-51	F	x	x	IGHJ6	F	IGHG2	F	CARGYFTDASGYMDVW	in-frame	134	0	0	0	0	0	0	0	134	0	0
IGHV4-61	F	x	x	IGHJ4	F	IGHG2	F	CARPAGGDYAFDYW	in-frame	134	0	0	0	134	0	0	0	0	0	0
IGHV4-59,IGHV4-4	F	IGHD5-12	F	IGHJ4	F	IGHG1	F	CARLYSGDDYYFDYW	in-frame	134	0	0	134	0	0	0	0	0	0	0
IGHV4-55	P	x	x	IGHJ5	F	IGHG1	F	CARVENTGYHTLFDSW	in-frame	134	0	0	0	0	0	134	0	0	0	0
IGHV4-34	F	IGHD3-22	F	IGHJ5	F	IGHG1	F	CARGKDYYDSSGYWFDPW	in-frame	134	0	0	134	0	0	0	0	0	0	0
IGHV3-NL1	F	IGHD4-17	F	IGHJ4	F	IGHG2	F	CAKILGDGDYVELVDYW	in-frame	134	0	0	0	0	0	0	0	0	134	0
IGHV3-9	F	x	x	IGHJ6	F	IGHG2	F	CVKDRGVVGESVYGMDVW	in-frame	134	0	0	0	0	0	0	0	0	0	134
IGHV3-9	F	x	x	IGHJ6	F	IGHG2	F	CIAEMTNGGAGVW	in-frame	134	0	0	0	0	0	0	0	0	0	134
IGHV3-9	F	x	x	IGHJ4	F	IGHG2	F	CVRDVHGTPYYFDFW	in-frame	134	0	0	0	0	0	0	0	0	134	0
IGHV3-9	F	IGHD6-19,IGHD3-22	F	IGHJ5	F	IGHG1	F	CVKDSSGWWGVTQRFDPW	in-frame	134	0	0	134	0	0	0	0	0	0	0
IGHV3-9	F	IGHD6-19	F	IGHJ4	F	IGHG4	F	CAKDITSSGFSTPDYW	in-frame	134	0	0	0	0	0	0	0	134	0	0
IGHV3-74	F	x	x	IGHJ4	F	IGHG2	F	CSRDTFGKYDQW	in-frame	134	134	0	0	0	0	0	0	0	0	0
IGHV3-7,IGHV3-69-1,IGHV3-48,IGHV3-21	F	x	x	IGHJ6	F	IGHG2	F	CARVLAAGRDSYYMDVW	in-frame	134	0	0	0	0	0	0	0	0	134	0
IGHV3-7,IGHV3-69-1,IGHV3-48,IGHV3-21	F	x	x	IGHJ4	F	IGHG2	F	CAIKWPGRGYYFDYW	in-frame	134	0	0	0	0	0	134	0	0	0	0
IGHV3-7	F	x	x	IGHJ4	F	IGHG2	F	CARHAGHFGDYVHPYHFDSW	in-frame	134	0	0	0	0	0	0	134	0	0	0
IGHV3-69-1,IGHV3-48	P	IGHD2-21	F	IGHJ4	F	IGHG2	F	CAREVPSCGGDCLDYW	in-frame	134	0	0	0	0	0	0	0	134	0	0
IGHV3-64	F	IGHD3-22	F	IGHJ6	F	IGHG2	F	CARVQLDYYDSSGYYYYYYGMDVW	in-frame	134	0	0	134	0	0	0	0	0	0	0
IGHV3-48	F	x	x	IGHJ6	F	IGHG1	F	CARERLGYYYFYMDVW	in-frame	134	0	0	0	0	134	0	0	0	0	0
IGHV3-33	F	x	x	IGHJ5,IGHJ4	F	IGHG2	F	CARGGGAQYQMLIW	in-frame	134	0	0	0	0	0	0	0	0	134	0
IGHV3-33	F	x	x	IGHJ5	F	IGHG1	F	CARDLAWGGSSIDSW	in-frame	134	0	0	0	0	0	0	0	0	134	0
IGHV3-33	F	IGHD6-19	F	IGHJ6	F	IGHG1	F	CARDRDSSGWYDYYGMDVW	in-frame	134	0	134	0	0	0	0	0	0	0	0
IGHV3-23D	F	x	x	IGHJ5,IGHJ4	F	IGHG2	F	CAKDHSNWGWSW	in-frame	134	0	134	0	0	0	0	0	0	0	0
IGHV3-23D	F	x	x	IGHJ4	F	IGHG2	F	CAKVWQLKSGYFDYW	in-frame	134	134	0	0	0	0	0	0	0	0	0
IGHV3-15	F	x	x	IGHJ5,IGHJ4	F	IGHG2	F	CGFTSANYYEGHW	in-frame	134	0	0	0	0	0	0	0	0	134	0
IGHV3-15	F	IGHD3-3	F	IGHJ5	F	IGHG2	F	CTANLPLAPYYDFWSGYYSDHW	in-frame	134	0	0	0	0	134	0	0	0	0	0
IGHV2-5	F	x	x	IGHJ4	F	IGHG2	F	CAHRDSQLGYFDYW	in-frame	134	134	0	0	0	0	0	0	0	0	0
IGHV7-4-1	F	IGHD3-10	F	IGHJ5	F	IGHG1	F	CAREKAYYYGSGERIRWFDPW	in-frame	133	133	0	0	0	0	0	0	0	0	0
IGHV5-51	F	x	x	IGHJ4	F	IGHG1	F	CARQQWLFMNYFDYW	in-frame	133	0	0	0	0	0	0	0	0	133	0
IGHV4-61,IGHV4-59,IGHV4-38-2,IGHV4-30-2	F	IGHD5-12	F	IGHJ4	F	IGHG2	F	CAKRGYSGYDSGYFDDW	in-frame	133	0	0	133	0	0	0	0	0	0	0
IGHV4-39	F	x	x	IGHJ3	F	IGHG2	F	CATGSHEKGDGVDAFDIW	in-frame	133	0	0	0	0	0	0	0	0	133	0
IGHV4-39	F	IGHD5-12	F	IGHJ4	F	IGHG2	F	CARHLYSGYDFYYFDYW	in-frame	133	0	0	133	0	0	0	0	0	0	0
IGHV4-39	F	IGHD4-17	F	IGHJ4	F	IGHG2	F	CASLYDYGDYWDHW	in-frame	133	0	0	0	0	0	0	0	0	0	133
IGHV4-34	F	x	x	IGHJ4	F	IGHG1	F	CARGATLVFDYW	in-frame	133	0	0	0	133	0	0	0	0	0	0
IGHV4-34	F	IGHD6-19	F	IGHJ6	F	IGHG1	F	CARGTPLYQQQWLGRTPEDPPYPSYYYIDVW	in-frame	133	0	0	0	0	0	133	0	0	0	0
IGHV4-34	F	IGHD3-10	F	IGHJ4	F	IGHG2	F	CARVPRSFYYGSETDPGDPLSNFDFW	in-frame	133	0	0	0	0	133	0	0	0	0	0
IGHV4-30-4	F	x	x	IGHJ5	F	IGHG3	F	CARAEGYFGVGAFVRWFDTW	in-frame	133	0	0	0	0	0	0	133	0	0	0
IGHV3-74	F	x	x	IGHJ4	F	IGHG1	F	CVRDSSLTYW	in-frame	133	0	0	0	0	0	0	0	133	0	0
IGHV3-66,IGHV3-30-3,IGHV3-30	F	x	x	IGHJ5	F	IGHG4	F	CARAGSTVAVGHLDSW	in-frame	133	0	0	0	133	0	0	0	0	0	0
IGHV3-53	F	x	x	IGHJ5	F	IGHG2	F	CASGRGNSW	in-frame	133	133	0	0	0	0	0	0	0	0	0
IGHV3-48	F	x	x	IGHJ5	F	IGHG2	F	CVRDSGVGGSVDLW	in-frame	133	133	0	0	0	0	0	0	0	0	0
IGHV3-23	F	x	x	IGHJ2	F	IGHG1	F	CAKSHNWIFDLW	in-frame	133	0	0	0	0	0	133	0	0	0	0
IGHV3-23	F	IGHD3-10	F	IGHJ4	F	IGHG2	F	CAKDRMARGVIHFDHW	in-frame	133	0	0	0	0	0	133	0	0	0	0
IGHV2-5	F	x	x	IGHJ4	F	IGHG1	F	CAHRHELRNDYSDFW	in-frame	133	0	0	0	0	0	0	133	0	0	0
IGHV1-69D	F	x	x	IGHJ3	F	IGHG2	F	CAYQMGTRDTAW	in-frame	133	0	0	0	0	0	0	0	0	133	0
IGHV1-69	F	x	x	IGHJ6	F	IGHG1	F	CARDGDYGMDVW	in-frame	133	0	0	133	0	0	0	0	0	0	0
IGHV1-2	F	IGHD3-10	F	IGHJ4	F	IGHG1	F	CARGSTTMVRGVTQYW	in-frame	133	0	0	133	0	0	0	0	0	0	0
IGHV1-18	F	IGHD3-22	F	IGHJ5	F	IGHG1	F	CARVDYDSSGYAWFDPW	in-frame	133	0	0	133	0	0	0	0	0	0	0
IGHV7-4-1	F	x	x	IGHJ4	F	IGHG2	F	CARAVPSADATPPFDYW	in-frame	132	0	0	0	0	0	0	132	0	0	0
IGHV4-61,IGHV4-59	F	x	x	IGHJ6	F	IGHG1	F	CARVKPARAGTYSYYGLDVW	in-frame	132	0	0	0	0	0	0	0	0	132	0
IGHV4-34	F	IGHD3-10	F	IGHJ6	F	IGHG1	F	CASLWFGARDGDYYYGMDVW	in-frame	132	0	0	132	0	0	0	0	0	0	0
IGHV4-34	F	IGHD3-10	F	IGHJ5	F	IGHG1	F	CARGPSLRLLWFGFNPW	in-frame	132	0	0	0	0	0	132	0	0	0	0
IGHV3-NL1,IGHV3-33,IGHV3-30-5,IGHV3-30-3	F	x	x	IGHJ3	F	IGHG1	F	CAKWDRRNDAFDNW	in-frame	132	0	0	0	0	0	132	0	0	0	0
IGHV3-NL1	F	IGHD3-3	F	IGHJ6	F	IGHG1	F	CAKDRDFWSGETDGMDVW	in-frame	132	0	0	0	0	0	0	0	0	132	0
IGHV3-9	F	x	x	IGHJ3	F	IGHG2	F	CANMASGPYAFDIW	in-frame	132	0	0	132	0	0	0	0	0	0	0
IGHV3-9	F	x	x	IGHJ2	F	IGHG3	F	CARIYYDTTGAHWYFDVW	in-frame	132	0	0	0	0	0	0	0	132	0	0
IGHV3-9	F	IGHD6-13	F	IGHJ5	F	IGHG1	F	CAKDISLAPAGTW	in-frame	132	0	0	0	0	132	0	0	0	0	0
IGHV3-73	F	x	x	IGHJ3	F	IGHG2	F	CVGRQDSDTFDMW	in-frame	132	132	0	0	0	0	0	0	0	0	0
IGHV3-7,IGHV3-69-1,IGHV3-48,IGHV3-21	F	IGHD6-6	F	IGHJ6	F	IGHG1	F	CARDPGWYSSSYYYYYYMDVW	in-frame	132	0	0	0	0	0	0	0	0	132	0
IGHV3-7	F	x	x	IGHJ4	F	IGHG2	F	CASAYGMSSDYW	in-frame	132	0	0	132	0	0	0	0	0	0	0
IGHV3-7	F	x	x	IGHJ4	F	IGHG1	F	CARNRYYHDYW	in-frame	132	0	0	0	0	0	0	0	0	132	0
IGHV3-33	F	IGHD6-13,IGHD6-19	F	IGHJ5	F	IGHG2	F	CVQEGGRYSSAWYISW	in-frame	132	0	0	0	132	0	0	0	0	0	0
IGHV3-33	F	IGHD4-17	F	IGHJ4	F	IGHG2	F	CARGSTVTTTPLDFW	in-frame	132	0	0	0	0	0	132	0	0	0	0
IGHV3-23D	F	x	x	IGHJ4	F	IGHG2	F	CAKDGMVRSDRPLENW	in-frame	132	132	0	0	0	0	0	0	0	0	0
IGHV3-23	F	IGHD6-13	F	IGHJ5	F	IGHG1	F	CAKIPSPYYSSWYGVHW	in-frame	132	0	0	132	0	0	0	0	0	0	0
IGHV2-5	F	x	x	IGHJ4	F	IGHG1	F	CAHRGVLYFDYW	in-frame	132	0	0	0	0	0	0	0	132	0	0
IGHV1-2	F	x	x	IGHJ4	F	IGHG4	F	CARVGVSAAVADYW	in-frame	132	0	0	0	0	0	0	0	0	0	132
IGHV1-18	F	x	x	IGHJ4	F	IGHG2	F	CARDLGQTSSWPHYW	in-frame	132	0	0	0	0	0	0	0	132	0	0
IGHV1-18	F	IGHD6-13	F	IGHJ4	F	IGHG2	F	CAREPPSTTAAGTLDYW	in-frame	132	0	0	0	0	132	0	0	0	0	0
IGHV5-51	F	x	x	IGHJ6	F	IGHG1	F	CASSSELYSYYYYGMDVW	in-frame	131	0	0	0	0	0	0	0	0	131	0
IGHV5-51	F	IGHD5-24	ORF	IGHJ4	F	IGHG1	F	CARRGDGYNYGYFDYW	in-frame	131	0	0	0	0	0	0	0	0	131	0
IGHV4-4	F	x	x	IGHJ5,IGHJ4	F	IGHG2	F	CSRDTQYQLEW	in-frame	131	0	0	0	131	0	0	0	0	0	0
IGHV4-39	F	x	x	IGHJ4	F	IGHG2	F	CARHWHNHHYDYW	in-frame	131	0	0	0	0	0	0	0	131	0	0
IGHV3-74	F	x	x	IGHJ6	F	IGHG2	F	CARAGGYEFIHYYFYGMDIW	in-frame	131	131	0	0	0	0	0	0	0	0	0
IGHV3-74	F	IGHD3-22	F	IGHJ1,IGHJ4	F	IGHG2	F	CARASMGEYDTSGYYLHW	in-frame	131	0	0	0	0	0	0	0	0	131	0
IGHV3-7,IGHV3-69-1,IGHV3-48	F	x	x	IGHJ4	F	IGHG2	F	CARQNPRIGREVTVIDFW	in-frame	131	0	0	131	0	0	0	0	0	0	0
IGHV3-64,IGHV3-30-3,IGHV3-30	F	IGHD6-13	F	IGHJ4	F	IGHG2	F	CARDRRIAAADLKYYFDYW	in-frame	131	0	0	0	0	0	0	0	0	131	0
IGHV3-49	F	x	x	IGHJ2	F	IGHG2	F	CSRIDHCSATRCYNHYYSDFW	in-frame	131	0	0	0	0	131	0	0	0	0	0
IGHV3-49	F	IGHD3-10	F	IGHJ4	F	IGHG2	F	CARRAYGSGRYSGRYFDSW	in-frame	131	131	0	0	0	0	0	0	0	0	0
IGHV3-33	F	IGHD6-19	F	IGHJ4	F	IGHG2	F	CAKSSGWYHALMDFW	in-frame	131	0	0	0	0	131	0	0	0	0	0
IGHV3-30-3	F	IGHD6-19	F	IGHJ4	F	IGHG2	F	CARGGSGWSFHYW	in-frame	131	131	0	0	0	0	0	0	0	0	0
IGHV3-23D	F	x	x	IGHJ4	F	IGHG1	F	CAKETKLIPAAGHFDFW	in-frame	131	131	0	0	0	0	0	0	0	0	0
IGHV3-15	F	x	x	IGHJ5,IGHJ4	F	IGHG2	F	CTTRSGFW	in-frame	131	131	0	0	0	0	0	0	0	0	0
IGHV1-69D,IGHV1-69	F	x	x	IGHJ4	F	IGHG2	F	CARTYIKRCFAYW	in-frame	131	0	0	0	0	131	0	0	0	0	0
IGHV1-69D	F	IGHD4-17	F	IGHJ6	F	IGHG1	F	CAKDEYGDYPTYRYYGMDVW	in-frame	131	0	0	131	0	0	0	0	0	0	0
IGHV7-4-1	F	x	x	IGHJ4	F	IGHG2	F	CARTLSGVTAPYFGFW	in-frame	130	0	0	130	0	0	0	0	0	0	0
IGHV6-1	F	x	x	IGHJ4	F	IGHG2	F	CVRTHWLDYFDYW	in-frame	130	0	0	0	0	0	0	0	130	0	0
IGHV5-51	F	x	x	IGHJ4	F	IGHG1	F	CATVRIGDANNWYTEGNYFAHW	in-frame	130	130	0	0	0	0	0	0	0	0	0
IGHV4-61,IGHV4-59	F	x	x	IGHJ6	F	IGHG2	F	CARSRRFSGPYYGLDVW	in-frame	130	0	0	0	0	0	0	0	0	0	130
IGHV4-39	F	IGHD3-22	F	IGHJ4	F	IGHG1	F	CARLLNTMIVEVGFDYW	in-frame	130	0	0	130	0	0	0	0	0	0	0
IGHV4-39	F	IGHD3-10	F	IGHJ5	F	IGHG3	F	CARQQGTYYYGSRSPPNWFDPW	in-frame	130	0	0	0	0	130	0	0	0	0	0
IGHV3-9	F	IGHD6-13	F	IGHJ4	F	IGHG1	F	CAKIIAAAGTRYFDYW	in-frame	130	0	130	0	0	0	0	0	0	0	0
IGHV3-7,IGHV3-69-1,IGHV3-48	F	x	x	IGHJ5	F	IGHG2	F	CATVTGFHVWSDPW	in-frame	130	0	0	0	130	0	0	0	0	0	0
IGHV3-7	F	x	x	IGHJ3	F	IGHG2	F	CATSFEHYNGHAGDGFDLW	in-frame	130	0	0	130	0	0	0	0	0	0	0
IGHV3-49	F	x	x	IGHJ6	F	IGHG2	F	CATVLIDSIRAVPSLVYHGMDVW	in-frame	130	0	1	129	0	0	0	0	0	0	0
IGHV3-48	F	x	x	IGHJ4	F	IGHG2	F	CARVFTSGYTLDYW	in-frame	130	0	0	0	0	130	0	0	0	0	0
IGHV3-48	F	x	x	IGHJ3	F	IGHG2	F	CARDRFWAFDMW	in-frame	130	130	0	0	0	0	0	0	0	0	0
IGHV3-23D	F	x	x	IGHJ6	F	IGHG2	F	CARRVGFLGSGLHGSGLMDVW	in-frame	130	0	0	0	0	130	0	0	0	0	0
IGHV3-23D	F	x	x	IGHJ4	F	IGHG3	F	CAKGRPLSNGFPTEKLDYW	in-frame	130	0	130	0	0	0	0	0	0	0	0
IGHV3-23D	F	IGHD6-19	F	IGHJ6	F	IGHG1	F	CAKDSSGWYLGVNYYYYGMDVW	in-frame	130	0	0	0	130	0	0	0	0	0	0
IGHV3-15	F	x	x	IGHJ5,IGHJ4	F	IGHG2	F	CATDDSKKDLGELSW	in-frame	130	0	0	0	0	0	0	0	0	0	130
IGHV3-11	F	x	x	IGHJ4	F	IGHG2	F	CARDPSGYGGDFDYW	in-frame	130	0	0	0	130	0	0	0	0	0	0
IGHV2-70D,IGHV2-70	F	x	x	IGHJ6	F	IGHG1	F	CARMAVDLPYYYYGMDVW	in-frame	130	0	0	0	0	0	0	0	0	0	130
IGHV1-8	F	x	x	IGHJ5,IGHJ4	F	IGHG1	F	CARVGYGARW	in-frame	130	0	0	0	0	0	0	0	130	0	0
IGHV1-69	F	IGHD2/OR15-2b,IGHD2/OR15-2a	ORF	IGHJ4	F	IGHG1	F	CARGVDGMFEKYYFDYW	in-frame	130	0	0	130	0	0	0	0	0	0	0
IGHV1-46	F	x	x	IGHJ4	F	IGHG2	F	CARDAWGPEYW	in-frame	130	0	0	0	0	0	0	0	0	0	130
IGHV1-3	F	x	x	IGHJ6	F	IGHG2	F	CAGPKAFSNTWWDGMDVW	in-frame	130	0	0	0	0	0	0	0	0	0	130
IGHV1-3	F	IGHD3-16	F	IGHJ6	F	IGHG3	F	CARDRYYGWGSYNYMDVW	in-frame	130	0	130	0	0	0	0	0	0	0	0
IGHV1-18	F	x	x	IGHJ6	F	IGHG2	F	CARVRGRNSYGDRGYYYGMDVW	in-frame	130	0	0	130	0	0	0	0	0	0	0
IGHV1-18	F	x	x	IGHJ6	F	IGHG1	F	CASSHGSYYYYGMDVW	in-frame	130	0	130	0	0	0	0	0	0	0	0
IGHV1-18	F	IGHD6-19	F	IGHJ4	F	IGHG2	F	CVRDRLTDSRGWFEEGRGYW	in-frame	130	0	0	0	0	0	0	0	130	0	0
IGHV5-51	F	x	x	IGHJ4	F	IGHG1	F	CARRSPGMWLDYW	in-frame	129	0	0	129	0	0	0	0	0	0	0
IGHV4/OR15-8	ORF	IGHD5-24	ORF	IGHJ2	F	IGHG1	F	CARAIRDGYHQTHEPTYWYFDLW	in-frame	129	0	0	0	0	0	0	0	0	129	0
IGHV4-61	F	IGHD4-23	ORF	IGHJ4	F	IGHG1	F	CASLSHGGNWGTFDFW	in-frame	129	0	0	0	0	0	0	0	0	129	0
IGHV4-61	F	IGHD3-10	F	IGHJ3	F	IGHG2	F	CARDTYYSGSGSYFHDVFDIW	in-frame	129	129	0	0	0	0	0	0	0	0	0
IGHV4-34	F	IGHD3-10	F	IGHJ6	F	IGHG2	F	CARALWFGELSHQWYYYYGMDVW	in-frame	129	0	0	0	0	0	0	0	0	0	129
IGHV3-9	F	x	x	IGHJ6	F	IGHG2	F	CTRDITPGGADVW	in-frame	129	129	0	0	0	0	0	0	0	0	0
IGHV3-9	F	x	x	IGHJ5	F	IGHG2	F	CVIGKPGGWFAW	in-frame	129	0	0	0	0	129	0	0	0	0	0
IGHV3-33	F	x	x	IGHJ6	F	IGHG2	F	CARERRWAAAGWGYGMDVW	in-frame	129	0	0	0	0	0	0	0	0	129	0
IGHV3-23D	F	x	x	IGHJ6	F	IGHG1	F	CAKDMFWFTAMVNEPMDVW	in-frame	129	0	0	0	0	129	0	0	0	0	0
IGHV3-23D	F	IGHD6-13	F	IGHJ6	F	IGHG1	F	CAKGGQQLVRTYYMDVW	in-frame	129	0	0	0	0	129	0	0	0	0	0
IGHV3-21	F	x	x	IGHJ5	F	IGHG2	F	CARAYDDMSWLGFW	in-frame	129	0	0	0	0	0	0	0	0	129	0
IGHV3-20	ORF	IGHD6-13	F	IGHJ5	F	IGHG1	F	CAREGVIAAAGLTLWFDPW	in-frame	129	0	0	0	0	0	0	0	129	0	0
IGHV3-20	ORF	IGHD6-13	F	IGHJ3	F	IGHG1	F	CARVEIRGGIAAAAFDIW	in-frame	129	0	0	129	0	0	0	0	0	0	0
IGHV3-15	F	IGHD3-10	F	IGHJ4	F	IGHG4	F	CTTDLGGYLGSVRYFNRPYW	in-frame	129	0	0	0	0	129	0	0	0	0	0
IGHV3-13	F	x	x	IGHJ6	F	IGHG2	F	CARSYSTRFGQSHGMDVW	in-frame	129	0	0	129	0	0	0	0	0	0	0
IGHV2-70D,IGHV2-70	F	x	x	IGHJ6	F	IGHG2	F	CARMKAGGAKGGYFYFYNGMDVW	in-frame	129	0	0	0	0	0	0	0	129	0	0
IGHV2-5	F	x	x	IGHJ5	F	IGHG1	F	CVHRAQDPRVRSAGYDSW	in-frame	129	0	0	0	0	0	0	129	0	0	0
IGHV1-69D,IGHV1-69	F	x	x	IGHJ6	F	IGHG2	F	CVRDYGGAAPIKSYHYGLDVW	in-frame	129	129	0	0	0	0	0	0	0	0	0
IGHV1-69	F	x	x	IGHJ4	F	IGHG1	F	CAREGLRRLGYFDYW	in-frame	129	0	0	129	0	0	0	0	0	0	0
IGHV1-18	F	IGHD1-26	F	IGHJ3	F	IGHG1	F	CAREDLRGSYDAFDIW	in-frame	129	0	0	0	0	0	0	0	129	0	0
IGHV4-59,IGHV4-39	F	x	x	IGHJ4	F	IGHG2	F	CAASPSFVNSDSHRSPLDYW	in-frame	128	0	0	0	128	0	0	0	0	0	0
IGHV4-59	F	IGHD6-13	F	IGHJ3	F	IGHG1	F	CAKGHSSSWYHAFDIW	in-frame	128	0	0	128	0	0	0	0	0	0	0
IGHV4-4	F	x	x	IGHJ4	F	IGHG2	F	CAREDLAIIPAALSNW	in-frame	128	0	0	0	0	0	0	0	0	0	128
IGHV4-39	F	x	x	IGHJ3	F	IGHG2	F	CARNWGNAFDIW	in-frame	128	0	0	0	0	0	0	0	128	0	0
IGHV4-34,IGHV4-31	F	x	x	IGHJ4	F	IGHG1	F	CATTRNWNDRAIDNW	in-frame	128	0	0	128	0	0	0	0	0	0	0
IGHV3-9	F	x	x	IGHJ4	F	IGHG1	F	CAKASPMVTYIDSW	in-frame	128	0	0	0	0	0	0	128	0	0	0
IGHV3-74	F	IGHD2-2	F	IGHJ6	F	IGHG1	F	CARGVVVPAAMHDYYYYMDVW	in-frame	128	0	0	0	0	0	0	0	0	128	0
IGHV3-66	F	x	x	IGHJ5,IGHJ4	F	IGHG2	F	CATNRGVGAPVDFW	in-frame	128	0	0	0	0	0	0	0	128	0	0
IGHV3-43	F	IGHD2-15	F	IGHJ4	F	IGHG1	F	CARGNYCSGSACFVIDYW	in-frame	128	0	0	0	128	0	0	0	0	0	0
IGHV3-33	F	IGHD3-10	F	IGHJ4	F	IGHG1	F	CARVRLWFGELSAQYYFDYW	in-frame	128	0	0	0	0	0	0	0	0	128	0
IGHV3-23D	F	IGHD5-12	F	IGHJ4	F	IGHG2	F	CVKVVDGRYSGYAFDYW	in-frame	128	0	0	0	0	0	0	0	0	0	128
IGHV3-15	F	x	x	IGHJ6	F	IGHG1	F	CATVGFCDSATWSGAGSCSYFYYYMDAW	in-frame	128	0	0	0	0	0	0	128	0	0	0
IGHV3-11	F	x	x	IGHJ4	F	IGHG2	F	CASASKTAAGTSYDYW	in-frame	128	0	0	0	0	0	0	0	0	128	0
IGHV2-5	F	x	x	IGHJ4	F	IGHG2	F	CAHTVGKWLGPDYW	in-frame	128	0	0	0	0	0	0	0	128	0	0
IGHV1-3	F	x	x	IGHJ4	F	IGHG1	F	CTRLSLSFGKVRGYEYW	in-frame	128	0	0	0	0	0	128	0	0	0	0
IGHV1-18	F	IGHD5-12	F	IGHJ6	F	IGHG1	F	CARDPSIGYSGYGRYYYLDVW	in-frame	128	0	0	0	0	0	0	0	128	0	0
IGHV5-51	F	x	x	IGHJ6	F	IGHG2	F	CARRNMVYFHYMDVW	in-frame	127	0	0	0	0	127	0	0	0	0	0
IGHV4-61,IGHV4-59	F	x	x	IGHJ5	F	IGHG2	F	CVIGVGWQHDAW	in-frame	127	0	0	0	0	127	0	0	0	0	0
IGHV4-59	F	IGHD3-22	F	IGHJ6	F	IGHG1	F	CARHQTGYYYDSSGYYRDYYYMDVW	in-frame	127	0	0	0	0	0	0	0	127	0	0
IGHV4-30-2	F	x	x	IGHJ3	F	IGHG2	F	CARDAWHINEGHQTDDAFDFW	in-frame	127	0	0	0	0	0	0	0	0	0	127
IGHV3-9	F	IGHD4-17	F	IGHJ4	F	IGHG1	F	CVKGSTVTTGYFDSW	in-frame	127	0	0	127	0	0	0	0	0	0	0
IGHV3-74	F	x	x	IGHJ6	F	IGHG2	F	CARAGGYDFIHRYFYGLDVW	in-frame	127	127	0	0	0	0	0	0	0	0	0
IGHV3-74	F	x	x	IGHJ6	F	IGHG2	F	CARAGAYAFIHRYLYGLDVW	in-frame	127	127	0	0	0	0	0	0	0	0	0
IGHV3-74	F	x	x	IGHJ3	F	IGHG1	F	CVRSLGAGTFDIW	in-frame	127	0	0	0	0	0	0	0	0	127	0
IGHV3-74	F	IGHD3-10	F	IGHJ5,IGHJ4	F	IGHG2	F	CARDLGGLGSSW	in-frame	127	0	0	127	0	0	0	0	0	0	0
IGHV3-73	F	x	x	IGHJ4	F	IGHG1	F	CTRHMKDYW	in-frame	127	0	0	0	0	0	0	0	0	127	0
IGHV3-69-1	P	IGHD3-9	F	IGHJ5	F	IGHG2	F	CARVHYDILTGSDNWFDPW	in-frame	127	0	0	0	0	0	127	0	0	0	0
IGHV3-53	F	IGHD4-17	F	IGHJ1,IGHJ4	F	IGHG2	F	CAREGNDYGDYFRYW	in-frame	127	0	0	0	0	0	0	0	127	0	0
IGHV3-49	F	x	x	IGHJ4	F	IGHG1	F	CGREGVLLHADYVDYW	in-frame	127	0	0	127	0	0	0	0	0	0	0
IGHV3-49	F	IGHD3-10	F	IGHJ3	F	IGHG2	F	CARGNYGVPHPDAFDIW	in-frame	127	0	0	0	127	0	0	0	0	0	0
IGHV3-23D	F	x	x	IGHJ4	F	IGHG4	F	CAKNSTDSYYGNLDSW	in-frame	127	0	0	0	0	127	0	0	0	0	0
IGHV3-23D	F	IGHD2-21	F	IGHJ4	F	IGHG3	F	CAKGAYCGGDCYRQLDSW	in-frame	127	127	0	0	0	0	0	0	0	0	0
IGHV3-23	F	IGHD3-10	F	IGHJ4	F	IGHG1	F	CAKSRWFGESMDFDYW	in-frame	127	0	0	127	0	0	0	0	0	0	0
IGHV3-15	F	x	x	IGHJ4	F	IGHG2	F	CATSISPVGGNYW	in-frame	127	0	0	0	0	0	0	0	127	0	0
IGHV1-46	F	IGHD6-13	F	IGHJ4	F	IGHG1	F	CTKPLIAAAGRGFDFW	in-frame	127	0	127	0	0	0	0	0	0	0	0
IGHV1-18	F	x	x	IGHJ4	F	IGHG1	F	CTSSYYANPYYFDYW	in-frame	127	0	0	127	0	0	0	0	0	0	0
IGHV1-18	F	IGHD4-17	F	IGHJ4	F	IGHG1	F	CARDGRVDYGDSPGDYW	in-frame	127	0	127	0	0	0	0	0	0	0	0
IGHV1-18	F	IGHD3-3	F	IGHJ4	F	IGHG2	F	CARDRGSRGFGVVMPVGFW	in-frame	127	0	0	0	0	0	0	127	0	0	0
IGHV7-4-1	F	x	x	IGHJ4	F	IGHG2	F	CVRWFFSAGRGVGFDSW	in-frame	126	126	0	0	0	0	0	0	0	0	0
IGHV7-4-1	F	IGHD3-22	F	IGHJ6	F	IGHG1	F	CAKIGNYYDNSGYEQVYYYYYGIDIW	in-frame	126	0	0	0	0	0	0	126	0	0	0
IGHV5-51	F	IGHD6-19	F	IGHJ4	F	IGHG2	F	CARFLTYSSAWYFDLW	in-frame	126	0	0	0	0	126	0	0	0	0	0
IGHV4-61,IGHV4-59	F	x	x	IGHJ4	F	IGHG2	F	CARWPSVGATPFFDYW	in-frame	126	0	0	126	0	0	0	0	0	0	0
IGHV4-61,IGHV4-59	F	x	x	IGHJ3	F	IGHG1	F	CARDHHTVTNIW	in-frame	126	0	0	0	0	126	0	0	0	0	0
IGHV4-59	F	x	x	IGHJ3	F	IGHG2	F	CAGGGGVFSYAFDVW	in-frame	126	126	0	0	0	0	0	0	0	0	0
IGHV4-4	F	x	x	IGHJ3	F	IGHG2	F	CVRGTSGSIW	in-frame	126	0	126	0	0	0	0	0	0	0	0
IGHV4-34,IGHV4-31	F	IGHD5-5,IGHD5-18	F	IGHJ4	F	IGHG2	F	CARGDSYGYGNFDYW	in-frame	126	0	0	0	0	0	0	0	0	126	0
IGHV4-34	F	IGHD3-10	F	IGHJ3	F	IGHG1	F	CARVPRQYYGSGNYYYDAFDIW	in-frame	126	126	0	0	0	0	0	0	0	0	0
IGHV3-9	F	x	x	IGHJ6	F	IGHG1	F	CTRHQGLGYRWGYMDVW	in-frame	126	0	0	0	0	126	0	0	0	0	0
IGHV3-9	F	IGHD5-24	ORF	IGHJ4	F	IGHG2	F	CAKDKEMATITVFDYW	in-frame	126	0	0	126	0	0	0	0	0	0	0
IGHV3-7,IGHV3-69-1,IGHV3-48	F	x	x	IGHJ5	F	IGHG2	F	CVRGSHNIAWYWAPGADNWFDLW	in-frame	126	0	0	0	0	0	126	0	0	0	0
IGHV3-69-1,IGHV3-48	P	x	x	IGHJ5,IGHJ4	F	IGHG1	F	CARGHPDTAMVLQFW	in-frame	126	0	0	126	0	0	0	0	0	0	0
IGHV3-66	F	IGHD6-6	F	IGHJ5	F	IGHG1	F	CARERGREYSSHGGYFDPW	in-frame	126	0	0	0	126	0	0	0	0	0	0
IGHV3-48	F	x	x	IGHJ5	F	IGHG1	F	CARGKTGSNWFDPW	in-frame	126	0	0	126	0	0	0	0	0	0	0
IGHV3-48	F	IGHD3-3	F	IGHJ4	F	IGHG2	F	CVIGWLWPLGVYW	in-frame	126	0	0	0	126	0	0	0	0	0	0
IGHV3-33	F	IGHD3-10	F	IGHJ5,IGHJ4	F	IGHG1	F	CARDRGFYGSGSVAFW	in-frame	126	0	0	126	0	0	0	0	0	0	0
IGHV3-23D	F	x	x	IGHJ5,IGHJ4	F	IGHG2	F	CAMGNNWKCEGW	in-frame	126	0	0	0	0	126	0	0	0	0	0
IGHV3-23D	F	x	x	IGHJ3	F	IGHG1	F	CAKSHCDTGSCFCAFDVW	in-frame	126	0	0	0	0	0	126	0	0	0	0
IGHV3-15	F	IGHD4-17	F	IGHJ3	F	IGHG2	F	CATDWGTVTTYVRAFDVW	in-frame	126	0	0	0	0	0	0	0	126	0	0
IGHV1-3	F	IGHD3-10	F	IGHJ4	F	IGHG1	F	CAREYGYYYGSGSYPGYW	in-frame	126	0	0	0	0	0	0	0	0	0	126
IGHV1-18	F	x	x	IGHJ4	F	IGHG3	F	CARDQNQGVGANEFDYW	in-frame	126	0	0	0	126	0	0	0	0	0	0
IGHV1-18	F	x	x	IGHJ1	F	IGHG1	F	CARDVGQYEARHW	in-frame	126	0	0	126	0	0	0	0	0	0	0
IGHV5-51	F	x	x	IGHJ4	F	IGHG1	F	CARFLTYSSAWYFDHW	in-frame	125	0	0	0	0	125	0	0	0	0	0
IGHV4-59,IGHV4-39	F	x	x	IGHJ4	F	IGHG2	F	CARSGGYDQTQYYLDYW	in-frame	125	125	0	0	0	0	0	0	0	0	0
IGHV4-59	F	IGHD6-13	F	IGHJ6	F	IGHG1	F	CARGPRYSSSCSHGMDVW	in-frame	125	125	0	0	0	0	0	0	0	0	0
IGHV3-9	F	IGHD3-22	F	IGHJ5	F	IGHG1	F	CAKSYDSSGLYPGRPFDPW	in-frame	125	0	0	125	0	0	0	0	0	0	0
IGHV3-9	F	IGHD3-22	F	IGHJ4	F	IGHG1	F	CARLTGGNYDSSHYYSYW	in-frame	125	0	0	125	0	0	0	0	0	0	0
IGHV3-9	F	IGHD3-10	F	IGHJ3	F	IGHG1	F	CVKDFYNSGSSPRNAFHIW	in-frame	125	0	0	125	0	0	0	0	0	0	0
IGHV3-7	F	x	x	IGHJ4	F	IGHG1	F	CAREKPRSGSLDFW	in-frame	125	0	0	0	0	0	0	0	0	125	0
IGHV3-64	F	x	x	IGHJ3	F	IGHG2	F	CARENYYITDTKIIGALDIW	in-frame	125	0	0	0	0	0	0	0	0	125	0
IGHV3-23	F	x	x	IGHJ4	F	IGHG2	F	CAKGGWGDYW	in-frame	125	0	0	125	0	0	0	0	0	0	0
IGHV3-15	F	x	x	IGHJ5,IGHJ4	F	IGHG2	F	CATDDSKKDLGELRW	in-frame	125	0	0	0	0	0	0	0	0	0	125
IGHV3-15	F	x	x	IGHJ4	F	IGHG2	F	CTADVPRSRRYSHDFW	in-frame	125	125	0	0	0	0	0	0	0	0	0
IGHV3-15	F	IGHD4-17	F	IGHJ4	F	IGHG2	F	CTTDGLRGDYGDYHPNW	in-frame	125	0	0	0	0	0	0	125	0	0	0
IGHV3-11	F	x	x	IGHJ4	F	IGHG2	F	CARGRGVGGTPYYFDYW	in-frame	125	0	0	0	0	0	0	0	125	0	0
IGHV2-5	F	IGHD3-22,IGHD3-3	F	IGHJ5	F	IGHG4	F	CAQLRSYYATGGYYYDHW	in-frame	125	0	0	0	0	0	0	125	0	0	0
IGHV1-46	F	x	x	IGHJ6	F	IGHG2	F	CARDLGGVLDYYYGMDVW	in-frame	125	125	0	0	0	0	0	0	0	0	0
IGHV1-46	F	x	x	IGHJ4	F	IGHG2	F	CARELRGGYFDYW	in-frame	125	125	0	0	0	0	0	0	0	0	0
IGHV1-18	F	x	x	IGHJ4	F	IGHG1	F	CARGGVFSGATLAFFW	in-frame	125	0	0	125	0	0	0	0	0	0	0
IGHV1-18	F	IGHD3-22	F	IGHJ6	F	IGHG1	F	CARVGHYYDRSGYYILPGMDVW	in-frame	125	0	0	125	0	0	0	0	0	0	0
IGHV7-4-1	F	IGHD3-10	F	IGHJ4	F	IGHG2	F	CARSLVGSGSRRPYYFDSW	in-frame	124	124	0	0	0	0	0	0	0	0	0
IGHV6-1	F	x	x	IGHJ5	F	IGHG2	F	CARVINGRPLDSW	in-frame	124	0	0	0	0	0	0	0	0	124	0
IGHV4/OR15-8	ORF	IGHD6-13	F	IGHJ6	F	IGHG2	F	CARDGGAAAGTDYYYYGMDVW	in-frame	124	0	0	0	0	0	124	0	0	0	0
IGHV4-61	F	IGHD3-10	F	IGHJ6	F	IGHG1	F	CAREVHASTYYYGSGSYYNHNYYYYYMDVW	in-frame	124	0	0	0	0	0	124	0	0	0	0
IGHV4-59	F	x	x	IGHJ6	F	IGHG1	F	CARQPPPPWLKRGDYYYYGLDVW	in-frame	124	0	0	124	0	0	0	0	0	0	0
IGHV4-39	F	IGHD4-17	F	IGHJ4	F	IGHG2	F	CARRRLGYGDYGGGWDYW	in-frame	124	0	0	124	0	0	0	0	0	0	0
IGHV4-34	F	x	x	IGHJ6	F	IGHG3	F	CARVQRASPRGAFRRRFYDYYLDVW	in-frame	124	0	124	0	0	0	0	0	0	0	0
IGHV4-34	F	x	x	IGHJ6	F	IGHG1	F	CARALVTTTMVKRPAGAPHYYMDVW	in-frame	124	0	0	0	0	0	124	0	0	0	0
IGHV4-34	F	x	x	IGHJ4	F	IGHG1	F	CARCGGGSEGSFDSW	in-frame	124	0	0	0	0	124	0	0	0	0	0
IGHV3-9	F	x	x	IGHJ4	F	IGHG1	F	CAKDTNWGPRYFYFDYW	in-frame	124	0	0	0	124	0	0	0	0	0	0
IGHV3-74	F	IGHD5-24	ORF	IGHJ4	F	IGHG1	F	CARGYNYRFDLW	in-frame	124	124	0	0	0	0	0	0	0	0	0
IGHV3-7	F	x	x	IGHJ4	F	IGHG2	F	CARDSGNYYIDYW	in-frame	124	124	0	0	0	0	0	0	0	0	0
IGHV3-64D	F	IGHD6-13	F	IGHJ5	F	IGHG2	F	CVQEGGRYSSSWYISW	in-frame	124	0	0	0	124	0	0	0	0	0	0
IGHV3-64,IGHV3-30-3,IGHV3-30	F	IGHD2-21	F	IGHJ4	F	IGHG1	F	CARDPTLYCGGDCGRYYFDYW	in-frame	124	0	0	0	0	0	0	0	0	124	0
IGHV3-49	F	IGHD3-10	F	IGHJ3	F	IGHG2	F	CTCGFGSGTYYNEGFDIW	in-frame	124	124	0	0	0	0	0	0	0	0	0
IGHV3-48	F	x	x	IGHJ4	F	IGHG1	F	CARVGIEKPFDYW	in-frame	124	0	0	124	0	0	0	0	0	0	0
IGHV3-30-3	F	IGHD2-15	F	IGHJ2	F	IGHG2	F	CARGTVVAGHWYFDLW	in-frame	124	124	0	0	0	0	0	0	0	0	0
IGHV3-23D	F	x	x	IGHJ6	F	IGHG2	F	CVKDTDPSYFYPYMDVW	in-frame	124	0	0	0	0	0	0	0	124	0	0
IGHV3-23D	F	x	x	IGHJ4	F	IGHG1	F	CARGGALTGYLNYYFDSW	in-frame	124	0	0	0	0	0	124	0	0	0	0
IGHV3-23	F	x	x	IGHJ4	F	IGHG2	F	CVKMEGQIMNTWTFEYW	in-frame	124	0	0	124	0	0	0	0	0	0	0
IGHV2-70D,IGHV2-70	F	IGHD6-13	F	IGHJ4	F	IGHG1	F	CARIMLGSSWYSIDYW	in-frame	124	0	0	124	0	0	0	0	0	0	0
IGHV2-5	F	x	x	IGHJ5	F	IGHG2	F	CVHTQGSMIRAW	in-frame	124	0	0	0	124	0	0	0	0	0	0
IGHV2-26	F	IGHD6-19	F	IGHJ4	F	IGHG1	F	CARLTSSDWLNFDFW	in-frame	124	0	124	0	0	0	0	0	0	0	0
IGHV1-69-2	F	x	x	IGHJ5	F	IGHG1	F	CATDSRLTCNPW	in-frame	124	0	124	0	0	0	0	0	0	0	0
IGHV1-18	F	x	x	IGHJ4	F	IGHG4	F	CARGRGPVRGTFDNW	in-frame	124	0	0	0	0	124	0	0	0	0	0
IGHV4-61,IGHV4-59	F	IGHD3-9	F	IGHJ4	F	IGHG1	F	CAKAKFAKTYFDGLTGYSNLYYFDSW	in-frame	123	0	0	0	0	0	0	0	123	0	0
IGHV4-61,IGHV4-30-4,IGHV4-30-2	ORF	x	x	IGHJ6	F	IGHG2	F	CTREKVTPVGNEFYYYGMDVW	in-frame	123	123	0	0	0	0	0	0	0	0	0
IGHV4-61	F	x	x	IGHJ4	F	IGHG2	F	CAGQTGGIPYYFDYW	in-frame	123	123	0	0	0	0	0	0	0	0	0
IGHV4-39	F	x	x	IGHJ4	F	IGHG1	F	CARPLYYPTLFDYW	in-frame	123	0	0	123	0	0	0	0	0	0	0
IGHV4-34,IGHV4-31	F	x	x	IGHJ4	F	IGHG1	F	CARAAAVGTNYFCDSW	in-frame	123	0	0	0	0	0	0	0	123	0	0
IGHV4-34	F	IGHD4-17	F	IGHJ4	F	IGHG1	F	CARCFDYGDHTAFDYW	in-frame	123	0	0	123	0	0	0	0	0	0	0
IGHV4-34	F	IGHD1-26	F	IGHJ3	F	IGHG1	F	CARGPSGSYSRAFDIW	in-frame	123	0	0	123	0	0	0	0	0	0	0
IGHV3-9	F	IGHD6-13	F	IGHJ4	F	IGHG1	F	CAKDTSSSWYSFGSW	in-frame	123	0	0	123	0	0	0	0	0	0	0
IGHV3-74	F	x	x	IGHJ3	F	IGHG2	F	CARGGLDHGFDVW	in-frame	123	123	0	0	0	0	0	0	0	0	0
IGHV3-49	F	x	x	IGHJ3	F	IGHG2	F	CTRDISPTARGFDIW	in-frame	123	0	0	0	0	0	0	0	123	0	0
IGHV3-30-3,IGHV3-30	F	x	x	IGHJ4	F	IGHG2	F	CARDHNFDGDYW	in-frame	123	0	0	0	0	0	0	0	0	123	0
IGHV3-30	F	x	x	IGHJ5	F	IGHG1	F	CARGTGSRSSWLDPW	in-frame	123	0	0	0	123	0	0	0	0	0	0
IGHV3-23D	F	IGHD2-21,IGHD2-15	F	IGHJ4	F	IGHG2	F	CAKRSCSGDSCYFFDYW	in-frame	123	123	0	0	0	0	0	0	0	0	0
IGHV3-20	ORF	IGHD6-13	F	IGHJ5	F	IGHG1	F	CARFRAGSWYVYW	in-frame	123	0	123	0	0	0	0	0	0	0	0
IGHV1-69D	F	x	x	IGHJ4	F	IGHG1	F	CARDLGVRTERGDYW	in-frame	123	123	0	0	0	0	0	0	0	0	0
IGHV1-69-2	F	IGHD6-19	F	IGHJ4	F	IGHG1	F	CAKSSSGWYFGWVGGDNFFDYW	in-frame	123	0	123	0	0	0	0	0	0	0	0
IGHV1-69	F	x	x	IGHJ4	F	IGHG1	F	CARGRPKFYPYYFDFW	in-frame	123	0	0	0	123	0	0	0	0	0	0
IGHV1-3	F	x	x	IGHJ5	F	IGHG2	F	CARGGLISIIRGIIVPVNWFDPW	in-frame	123	0	0	0	0	123	0	0	0	0	0
IGHV1-3	F	x	x	IGHJ4	F	IGHG2	F	CARNKAHTIDLDYW	in-frame	123	0	0	0	123	0	0	0	0	0	0
IGHV1-3	F	x	x	IGHJ4	F	IGHG2	F	CARGSRNWNPDYW	in-frame	123	0	123	0	0	0	0	0	0	0	0
IGHV1-3	F	x	x	IGHJ3	F	IGHG2	F	CARDLPGWSIDDAFEIW	in-frame	123	0	0	123	0	0	0	0	0	0	0
IGHV1-18	F	x	x	IGHJ6	F	IGHG1	F	CARVGDFWGGAFSFRQFYYYYVDVW	in-frame	123	0	0	0	0	0	0	0	123	0	0
IGHV1-18	F	IGHD6-13	F	IGHJ4	F	IGHG2	F	CAREPPSTTAAGTLDFW	in-frame	123	0	0	0	0	123	0	0	0	0	0
IGHV4-61,IGHV4-59	F	IGHD6-19	F	IGHJ5	F	IGHG2	F	CAREGSRSSSGWYSNWFDPW	in-frame	122	0	0	0	0	0	0	0	0	122	0
IGHV4-61	F	IGHD6-13	F	IGHJ3	F	IGHG2	F	CARVGSSWPPDALDFW	in-frame	122	0	0	0	0	0	0	0	0	0	122
IGHV4-39	F	x	x	IGHJ3	F	IGHG1	F	CARPSEAAAAYDAFDIW	in-frame	122	0	0	0	122	0	0	0	0	0	0
IGHV4-39	F	IGHD5-12	F	IGHJ4	F	IGHG1	F	CARPRYSGYDWDYW	in-frame	122	0	0	0	0	0	0	0	122	0	0
IGHV4-34,IGHV4-31	F	IGHD6-13	F	IGHJ3	F	IGHG1	F	CARDPGGGIAAAGQARAFDIW	in-frame	122	0	0	122	0	0	0	0	0	0	0
IGHV4-34	F	x	x	IGHJ5,IGHJ4	F	IGHG1	F	CARDSTGLW	in-frame	122	0	0	122	0	0	0	0	0	0	0
IGHV4-30-2	F	IGHD3-3	F	IGHJ4	F	IGHG1	F	CASSLRFLEWLIDW	in-frame	122	0	122	0	0	0	0	0	0	0	0
IGHV3-9	F	x	x	IGHJ5	F	IGHG2	F	CARSKTATAPLDHW	in-frame	122	0	0	0	0	122	0	0	0	0	0
IGHV3-9	F	x	x	IGHJ3	F	IGHG2	F	CAKKDMSVPTTNAFHLW	in-frame	122	0	0	0	122	0	0	0	0	0	0
IGHV3-71	P	x	x	IGHJ5	F	IGHG2	F	CAKEGLRIGGGWFDPW	in-frame	122	0	0	0	0	0	0	0	0	122	0
IGHV3-7,IGHV3-69-1,IGHV3-48,IGHV3-21	F	x	x	IGHJ4	F	IGHG2	F	CARDGHYSENSPFYPDYW	in-frame	122	0	0	0	122	0	0	0	0	0	0
IGHV3-53	F	x	x	IGHJ4	F	IGHG2	F	CARDSAHSGTYFDYW	in-frame	122	0	0	0	0	0	0	0	0	0	122
IGHV3-23D	F	x	x	IGHJ1	F	IGHG2	F	CAGDWAW	in-frame	122	0	0	0	0	0	0	0	122	0	0
IGHV3-23D	F	IGHD6-19	F	IGHJ4	F	IGHG1	F	CAREVAVAGSFDSW	in-frame	122	0	0	122	0	0	0	0	0	0	0
IGHV3-23D	F	IGHD2-15	F	IGHJ2	F	IGHG1	F	CAKTYCSGGSCYYIYWYFDLW	in-frame	122	0	0	122	0	0	0	0	0	0	0
IGHV3-20	ORF	IGHD3-22	F	IGHJ6	F	IGHG1	F	CARVKKRDGYDNNGYYYGYYGMDVW	in-frame	122	0	0	122	0	0	0	0	0	0	0
IGHV3-13	F	x	x	IGHJ4	F	IGHG1	F	CVRATGKGLGNYFPYYFDYW	in-frame	122	0	0	0	0	0	0	0	0	0	122
IGHV1-69	F	IGHD6-25	F	IGHJ4	F	IGHG4	F	CATSGRSSGWNTEIYFDFW	in-frame	122	0	0	0	122	0	0	0	0	0	0
IGHV1-3	F	x	x	IGHJ4	F	IGHG2	F	CARDVVAGTPSPNDYW	in-frame	122	0	0	0	0	122	0	0	0	0	0
IGHV5-51	F	x	x	IGHJ5	F	IGHG2	F	CTRREEEGFDPW	in-frame	121	0	0	0	0	0	0	0	0	0	121
IGHV4/OR15-8,IGHV4-55,IGHV4-4	ORF	x	x	IGHJ4	F	IGHG2	F	CARGPQNAASFYGYW	in-frame	121	0	0	0	0	0	0	0	0	121	0
IGHV4-61,IGHV4-59	F	x	x	IGHJ4	F	IGHG1	F	CARDPVAAPFDFW	in-frame	121	0	0	0	0	0	0	0	121	0	0
IGHV3-9	F	x	x	IGHJ4	F	IGHG2	F	CAKGEGLDYW	in-frame	121	0	0	0	121	0	0	0	0	0	0
IGHV3-9	F	IGHD6-13	F	IGHJ6	F	IGHG1	F	CAGDIAAAGTPYYYGMDVW	in-frame	121	0	0	121	0	0	0	0	0	0	0
IGHV3-74	F	x	x	IGHJ2	F	IGHG2	F	CARGLLMNWYLDLW	in-frame	121	0	121	0	0	0	0	0	0	0	0
IGHV3-74	F	IGHD4-17	F	IGHJ5	F	IGHG2	F	CARDKLSYSDYPW	in-frame	121	0	0	0	0	0	0	121	0	0	0
IGHV3-71	P	IGHD3-10	F	IGHJ4	F	IGHG2	F	CARESPRDYGSGADFDYW	in-frame	121	0	0	0	0	0	0	0	0	121	0
IGHV3-7,IGHV3-69-1,IGHV3-48	F	x	x	IGHJ4	F	IGHG1	F	CARALLHLSERAVGGPIKSYYLDSW	in-frame	121	0	0	0	0	0	121	0	0	0	0
IGHV3-7	F	x	x	IGHJ6	F	IGHG2	F	CGRPGRGGPADVW	in-frame	121	0	0	0	0	0	0	0	0	121	0
IGHV3-64D	F	x	x	IGHJ4	F	IGHG2	F	CVRLDGGSYRGAYW	in-frame	121	0	0	0	0	0	0	121	0	0	0
IGHV3-53	F	x	x	IGHJ4	F	IGHG2	F	CARDTHSYMRADYW	in-frame	121	121	0	0	0	0	0	0	0	0	0
IGHV3-33,IGHV3-30	F	x	x	IGHJ3	F	IGHG1	F	CARASRAAGDTLDLW	in-frame	121	0	0	121	0	0	0	0	0	0	0
IGHV2-5	F	IGHD6-19	F	IGHJ4	F	IGHG2	F	CAHGSGWLSDYW	in-frame	121	0	0	0	121	0	0	0	0	0	0
IGHV1-69D	F	x	x	IGHJ6	F	IGHG1	F	CARCRYSVIVAGTRPSYYYMDVW	in-frame	121	0	0	0	0	0	0	0	0	121	0
IGHV1-69D	F	IGHD6-19	F	IGHJ6	F	IGHG1	F	CTNTEGAVAADRYYYMDVW	in-frame	121	0	0	0	0	0	121	0	0	0	0
IGHV1-18	F	x	x	IGHJ5	F	IGHG1	F	CATLQLAGTGWFDPW	in-frame	121	0	0	0	0	0	0	0	121	0	0
IGHV5-51	F	IGHD6-19	F	IGHJ3	F	IGHG1	F	CARPNPEKHSSGWYDAVDIW	in-frame	120	0	0	120	0	0	0	0	0	0	0
IGHV4/OR15-8	ORF	x	x	IGHJ4	F	IGHG1	F	CARGQADSKYFDYW	in-frame	120	0	0	0	0	0	0	120	0	0	0
IGHV4-61	F	x	x	IGHJ4	F	IGHG2	F	CARARSWLPFEYW	in-frame	120	0	120	0	0	0	0	0	0	0	0
IGHV4-59,IGHV4-34,IGHV4-31	F	x	x	IGHJ5	F	IGHG2	F	CAGAPGWGTSFGWFDPW	in-frame	120	120	0	0	0	0	0	0	0	0	0
IGHV4-4	F	x	x	IGHJ4	F	IGHG1	F	CARGGLTKFDYW	in-frame	120	0	0	0	0	120	0	0	0	0	0
IGHV4-39	F	x	x	IGHJ4	F	IGHG2	F	CARRTPGYYLDFW	in-frame	120	120	0	0	0	0	0	0	0	0	0
IGHV3-NL1,IGHV3-30-5,IGHV3-30-3,IGHV3-30	F	x	x	IGHJ4	F	IGHG2	F	CGKESHNNGYGSYFDHW	in-frame	120	0	0	0	0	0	0	0	0	120	0
IGHV3-9	F	IGHD6-13	F	IGHJ4	F	IGHG2	F	CVKGPTTAAGAKFGSW	in-frame	120	120	0	0	0	0	0	0	0	0	0
IGHV3-7,IGHV3-69-1,IGHV3-48,IGHV3-21	F	IGHD2-2	F	IGHJ6	F	IGHG2	F	CARNIDCSSTSCYLYYYYGMDVW	in-frame	120	0	0	0	0	0	0	0	0	120	0
IGHV3-66	F	x	x	IGHJ5,IGHJ4	F	IGHG2	F	CTREPTFW	in-frame	120	0	0	0	0	0	0	0	120	0	0
IGHV3-64	F	x	x	IGHJ4	F	IGHG3	F	CARDNTGFGEPFDYW	in-frame	120	0	0	0	0	0	0	0	0	120	0
IGHV3-53,IGHV3-33	F	x	x	IGHJ4	F	IGHG1	F	CAREGPHGTSHMFLDYW	in-frame	120	120	0	0	0	0	0	0	0	0	0
IGHV3-33	F	IGHD4/OR15-4b,IGHD3-10	ORF	IGHJ4	F	IGHG2	F	CARGLLYYYGTDYW	in-frame	120	0	0	120	0	0	0	0	0	0	0
IGHV3-23D	F	x	x	IGHJ6	F	IGHG2	F	CVKAAGLRIYHYYMDVW	in-frame	120	0	0	0	0	0	0	120	0	0	0
IGHV3-23D	F	x	x	IGHJ6	F	IGHG2	F	CANVPLAATVGYYYTMDVW	in-frame	120	0	0	0	0	0	0	0	120	0	0
IGHV3-23D	F	x	x	IGHJ5	F	IGHG2	F	CAKDKGNTYGYEKWFGPW	in-frame	120	0	0	0	0	0	0	0	0	0	120
IGHV3-23D	F	x	x	IGHJ2	F	IGHG2	F	CAKGRGIRWENWSFDLW	in-frame	120	0	0	0	0	0	0	120	0	0	0
IGHV3-23	F	IGHD2-2	F	IGHJ4	F	IGHG1	F	CAKADAPVVPAAMVYW	in-frame	120	0	0	0	0	0	120	0	0	0	0
IGHV2-26	F	x	x	IGHJ4	F	IGHG1	F	CARGMYDTSGFAFDLW	in-frame	120	0	0	0	0	0	0	0	120	0	0
IGHV2-26	F	IGHD3-22	F	IGHJ5	F	IGHG2	F	CARLNYYDTTGYYYYRGVVWFDPW	in-frame	120	0	0	0	0	0	0	0	0	120	0
IGHV1-69D	F	x	x	IGHJ1	F	IGHG1	F	CARAAEGVYGGNLQGLDFFHHW	in-frame	120	0	0	120	0	0	0	0	0	0	0
IGHV1-46	F	x	x	IGHJ4	F	IGHG1	F	CATAGNYGSFDYW	in-frame	120	0	0	120	0	0	0	0	0	0	0
IGHV1-3	F	x	x	IGHJ4	F	IGHG2	F	CVRKDFYASGTYHFDYW	in-frame	120	0	0	0	0	0	0	0	120	0	0
IGHV1-18	F	x	x	IGHJ6	F	IGHG2	F	CARVPVKLFPQGYYGMDVW	in-frame	120	0	0	0	0	0	0	0	0	0	120
IGHV1-18	F	x	x	IGHJ6	F	IGHG1	F	CARAGGDTTYFYYAMDVW	in-frame	120	0	0	0	0	0	0	0	0	0	120
IGHV1-18	F	IGHD5-5,IGHD5-18	F	IGHJ1	F	IGHG1	F	CARDTAMVSLGYFQHW	in-frame	120	0	0	0	0	0	0	0	0	0	120
IGHV1-18	F	IGHD3-22	F	IGHJ5	F	IGHG1	F	CARDSTYYYDSSGYYSNWFDPW	in-frame	120	0	0	120	0	0	0	0	0	0	0
IGHV5-51	F	x	x	IGHJ3	F	IGHG3	F	CARLRLGPSGAFLGDGFDVW	in-frame	119	0	0	0	0	0	0	0	0	119	0
IGHV4-61	F	x	x	IGHJ4	F	IGHG2	F	CVRRSRMSTATTGEFDYW	in-frame	119	0	0	0	0	0	119	0	0	0	0
IGHV4-61	F	IGHD1-26	F	IGHJ4	F	IGHG2	F	CASYIVGAGGPGFW	in-frame	119	0	0	0	0	0	0	0	0	119	0
IGHV4-59	F	IGHD1-20	F	IGHJ3	F	IGHG2	F	CARLNWNDPNDAFDIW	in-frame	119	0	0	119	0	0	0	0	0	0	0
IGHV4-39	F	x	x	IGHJ4	F	IGHG1	F	CARVREYNFDLW	in-frame	119	0	0	0	0	0	0	119	0	0	0
IGHV4-34,IGHV4-31	F	IGHD2-15	F	IGHJ4	F	IGHG1	F	CARGNVVVSAPLDYW	in-frame	119	0	0	0	0	0	0	0	0	0	119
IGHV3-NL1,IGHV3-30-5,IGHV3-30-3,IGHV3-30	F	IGHD4-4,IGHD4-11	F	IGHJ6	F	IGHG2	F	CAKDSNDYSNYYHYYMDLW	in-frame	119	0	0	0	0	0	0	119	0	0	0
IGHV3-9	F	x	x	IGHJ6	F	IGHG1	F	CAKAGALFRYQWYYYAMDVW	in-frame	119	0	0	0	0	0	0	0	119	0	0
IGHV3-72	F	IGHD3-3	F	IGHJ3	F	IGHG2	F	CTRGWGTAKYYAFDQW	in-frame	119	119	0	0	0	0	0	0	0	0	0
IGHV3-7	F	x	x	IGHJ4	F	IGHG1	F	CASPKRLPGYW	in-frame	119	119	0	0	0	0	0	0	0	0	0
IGHV3-7	F	x	x	IGHJ3	F	IGHG2	F	CARDRTSYDGSYYYDAFDIW	in-frame	119	0	0	0	0	0	0	0	0	119	0
IGHV3-23D	F	x	x	IGHJ4	F	IGHG2	F	CAKRDTSGWMHYW	in-frame	119	0	0	0	0	0	0	0	119	0	0
IGHV3-15	F	x	x	IGHJ3	F	IGHG2	F	CTTPRDNCGWSCGFGVW	in-frame	119	0	0	0	0	0	0	0	119	0	0
IGHV2-70D,IGHV2-70	F	IGHD3-3	F	IGHJ5	F	IGHG1	F	CARTRMTISGVAKYYTWFDPW	in-frame	119	0	0	0	0	119	0	0	0	0	0
IGHV2-5	F	x	x	IGHJ4	F	IGHG2	F	CTHSGGSGLYPGRGLKPLDSW	in-frame	119	0	0	0	0	0	0	0	119	0	0
IGHV1-69	F	x	x	IGHJ4	F	IGHG1	F	CARGRPKFYPYYFDYW	in-frame	119	0	0	0	119	0	0	0	0	0	0
IGHV1-2	F	x	x	IGHJ5	F	IGHG1	F	CARDLGDPLLVSGNWFDPW	in-frame	119	0	0	119	0	0	0	0	0	0	0
IGHV1-2	F	x	x	IGHJ4	F	IGHG2	F	CAREGMYSRAYYRACDYW	in-frame	119	0	0	0	0	0	0	0	0	0	119
IGHV1-18	F	x	x	IGHJ6	F	IGHG1	F	CAREELALFRGIASWGRVDFYNNGMDVW	in-frame	119	119	0	0	0	0	0	0	0	0	0
IGHV1-18	F	IGHD6-13	F	IGHJ6	F	IGHG1	F	CARDLIAAAVPYYYYAFDVW	in-frame	119	0	0	0	0	0	0	0	0	0	119
[truncated: 238,248+ more rows]
